# Supplementary material for: Exploring Sea Lice Vaccines against Early Stages of Infestation in Atlantic Salmon (Salmo salar)
Source: MDPI journal article supplement (doi:10.3390/vaccines10071063), 2022-07-01
Supplement: s1 [file s1]

**Table S1.** Primers list used for RT-qPCR analysis.

| Primer Name    | Gene                                               | Sequence 5'-3'           | Tm | Efficiency (%) | Reference |
|----------------|----------------------------------------------------|--------------------------|----|----------------|-----------|
| EF $\alpha$ _F | <i>Elongation factor-<br/>(reference gene)</i>     | TGCTGGTGGTGTGGGTGAGT     | 60 | 95,18          | [41]      |
| EF $\alpha$ _R |                                                    | CCTCAAACCGCTTCTGGCTGT    |    |                |           |
| IgM_F          | <i>Immunoglobulin M</i>                            | TGAGGAGAACTGTGGGCTACACT  | 60 | 99,98          | [38]      |
| IgM_R          |                                                    | TGTTAATGACCACTGAATGTGCAT |    |                |           |
| IgM_Prove      |                                                    | CATCAGATGCAGGTCC         |    |                |           |
| IgT_F          | <i>Immunoglobulin T</i>                            | CAACACTGACTGGAACAACAAGGT | 60 | 107,77         | [38]      |
| IgT_R          |                                                    | CGTCAGCGGTTCTGTTTTGGA    |    |                |           |
| IgT_Prove      |                                                    | AGTACAGCTGTGTGGTGCA      |    |                |           |
| COX-2_F        | <i>Cyclooxygenase 2</i>                            | CAGTGCTCCCAGATGCCAAG     | 60 | 102,34         | [41]      |
| COX-2_R        |                                                    | GCGAAGAAGGCGAACATGAG     |    |                |           |
| IL1B_F6        | <i>Interleukin-1B</i>                              | GATCTGGAGGTATCCCATCA     | 60 | 122,36         | [41]      |
| IL1B_R6        |                                                    | CACAGCACTCTCCAGCAAGA     |    |                |           |
| MHCII_F        | <i>Major<br/>histocompatibility<br/>complex II</i> | CTCCTCAAAGGACCTGCAGG     | 60 | 104,72         | [41]      |
| MHCII_R        |                                                    | TCAGGACCTTTGTTCCAGGC     |    |                |           |
| TLR22_3_F      | <i>Toll-like recePtor<br/>22</i>                   | TGCCTTCTAACCCTCTCCCT     | 61 | 91,36          | [41]      |
| TLR22_3_R      |                                                    | CGCTGCTCTCAGACAGGAAG     |    |                |           |
| FerritinM_F1   | <i>Ferritin M</i>                                  | TATCACCACGATTGCGAAGC     | 60 | 102,66         | [41]      |
| FerritinM_R1   |                                                    | CTCGTCGCTGTTCTCCTTGA     |    |                |           |
| GSHPx_F1       | <i>Glutathione<br/>peroxidase</i>                  | TAAAGTGGTGCTGATCGAGA     | 54 | 100,23         | [41]      |
| GSHPx_R1       |                                                    | GTTCTCCTGATGTCCGAAC      |    |                |           |
| Blv r_F1       | <i>Biliverdin reductase</i>                        | AAACAGATCCACCAGCCAGG     | 59 | 106,7          | [41]      |
| Blv r_R1       |                                                    | ACAGCCGACTTTAAGCAGCT     |    |                |           |
| Hep_F1         | <i>Hepcidin</i>                                    | GCTGTTCCTTTCTCCGAGGTGC   | 59 | 111,07         | [41]      |
| Hep_R1         |                                                    | GTGACAGCAGTTGCAGCACCA    |    |                |           |
| HO_F2          | <i>Heme oxygenase</i>                              | GTCCTCTCGAGTGGTGAAGC     | 61 | 94,21          | [41]      |
| HO_R2          |                                                    | ATCTCTGAGTCCCTGGCCAA     |    |                |           |
| ALA s_F1       | <i>Aminolevulinate<br/>synthase</i>                | GGTAGGATGCCTGCTGACTG     | 63 | 105,52         | [41]      |
| ALA s_R1       |                                                    | CCCCAAGCCTGTTTTGCTGA     |    |                |           |
| ALA d_F2       | <i>Aminolevulinate<br/>dehydratase</i>             | CCACTCGCCCATCCATCATA     | 59 | 126,72         | [41]      |
| ALA d_R2       |                                                    | ACACCTCACATGGACACTGT     |    |                |           |
| SOD_F1         | <i>Superoxide<br/>dismutase</i>                    | CCGTATTCTTTGAGCAGGAG     | 54 | 104,98         | [41]      |
| SOD_R1         |                                                    | AGCCGTTGGTGTGTCTC        |    |                |           |
