# Supplementary material for: Exploring Sea Lice Vaccines against Early Stages of Infestation in Atlantic Salmon (Salmo salar)
Source: MDPI journal article supplement (doi:10.3390/vaccines10071063), 2022-07-01

## Supplementary figure

**Figure S1.** Experimental design of vaccination trial. A: Experimental groups were used in the trial. B: Temporary work line and sample analysis methods. Each circle represents a tank.

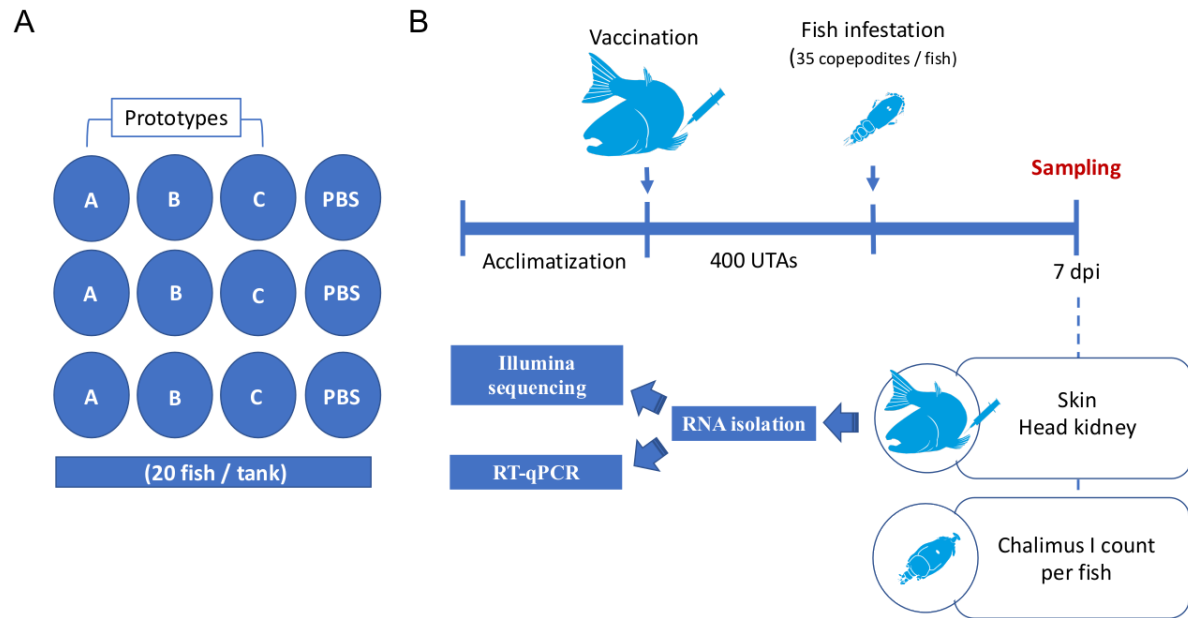

Supplement: s1 [file s1]
