# Supplementary material for: Exploring Sea Lice Vaccines against Early Stages of Infestation in Atlantic Salmon (Salmo salar)
Source: Vaccines (Basel). 2022 Jul 1;10(7):1063. doi: 10.3390/vaccines10071063 (PMC9324576; doi:10.3390/vaccines10071063)
Supplement: Supplementary file 1 [file vaccines-10-01063-s001.zip › Supplementary TableS2_Cluster analysis.xlsx]

## Sheet: Head kidney_Cluster1
Cluster analysis
Cluster 1	E-value	Description
contig_7dpi0000405	0.704867	CP192_CARAU Ovarian aromatase OS=Carassius auratus OX=7957 GN=cyp19a2 PE=2 SV=1
contig_7dpi0001888	4.59589	XKR8_GASAC XK-related protein 8 OS=Gasterosteus aculeatus OX=69293 GN=xkr8 PE=2 SV=1
contig_7dpi0048700	0.24126	CYB_DANRE Cytochrome b OS=Danio rerio OX=7955 GN=mt-cyb PE=3 SV=1
contig_7dpi0003057	0.0343036	MUCM_ICTPU Ig mu chain C region membrane-bound form OS=Ictalurus punctatus OX=7998 PE=2 SV=2
contig_7dpi0357393	2.22031	RT35_DANRE 28S ribosomal protein S35, mitochondrial OS=Danio rerio OX=7955 GN=mrps35 PE=2 SV=1
contig_7dpi0078470	0.854784	ADAL_DANRE Adenosine deaminase-like protein OS=Danio rerio OX=7955 GN=adal PE=2 SV=1
contig_7dpi0002300	0.841126	DBR1_DANRE Lariat debranching enzyme OS=Danio rerio OX=7955 GN=dbr1 PE=1 SV=1
contig_7dpi0000529	6.08525	CEP76_DANRE Centrosomal protein of 76 kDa OS=Danio rerio OX=7955 GN=cep76 PE=2 SV=1
contig_7dpi0018863	2.9457	WSB1_TAKRU WD repeat and SOCS box-containing protein 1 OS=Takifugu rubripes OX=31033 GN=wsb1 PE=2 SV=1
contig_7dpi0001670	0.862956	NLRC5_ICTPU Protein NLRC5 OS=Ictalurus punctatus OX=7998 GN=nlrc5 PE=2 SV=1
contig_7dpi0028473	2.4794	RFP4A_DANRE Rab11 family-interacting protein 4A OS=Danio rerio OX=7955 GN=rab11fip4a PE=2 SV=1
contig_7dpi0001359	1.52771	INT3_DANRE Integrator complex subunit 3 OS=Danio rerio OX=7955 GN=ints3 PE=2 SV=1
contig_7dpi0206189	1.70791	LDHC_FUNHE L-lactate dehydrogenase C chain OS=Fundulus heteroclitus OX=8078 GN=ldhc PE=2 SV=3
contig_7dpi0001776	2.79843	CFA36_DANRE Cilia- and flagella-associated protein 36 OS=Danio rerio OX=7955 GN=cfap36 PE=2 SV=2
contig_7dpi0000721	1.82126	PHF2_DANRE Lysine-specific demethylase phf2 OS=Danio rerio OX=7955 GN=phf2 PE=2 SV=3
contig_7dpi0024307	1.80274	NOC4L_DANRE Nucleolar complex protein 4 homolog OS=Danio rerio OX=7955 GN=noc4l PE=2 SV=1
contig_7dpi0231745	1.44718	PXYP1_DANRE 2-phosphoxylose phosphatase 1 OS=Danio rerio OX=7955 GN=pxylp1 PE=2 SV=1
contig_7dpi0190482		not available
contig_7dpi0044602		not available
contig_7dpi0048232	2.05355	C1GTB_DANRE Glycoprotein-N-acetylgalactosamine 3-beta-galactosyltransferase 1-B OS=Danio rerio OX=7955 GN=c1galt1b PE=2 SV=1
contig_7dpi0066695	7.13647	INTU_DANRE Protein inturned OS=Danio rerio OX=7955 GN=intu PE=3 SV=1
contig_7dpi0005128	8.37198e-14	COL11_DANRE Collectin-11 OS=Danio rerio OX=7955 GN=colec11 PE=2 SV=1
contig_7dpi0000040	3.0601	WSB1_DANRE WD repeat and SOCS box-containing protein 1 OS=Danio rerio OX=7955 GN=wsb1 PE=2 SV=1
contig_7dpi0010397	0.00854962	NLRC5_ICTPU Protein NLRC5 OS=Ictalurus punctatus OX=7998 GN=nlrc5 PE=2 SV=1
contig_7dpi0015223		not available
contig_7dpi0685668	2.56144	MINY3_DANRE Ubiquitin carboxyl-terminal hydrolase MINDY-3 OS=Danio rerio OX=7955 GN=mindy3 PE=2 SV=1
contig_7dpi0159850	7.56197	ACES_ELEEL Acetylcholinesterase OS=Electrophorus electricus OX=8005 GN=ache PE=3 SV=1
contig_7dpi0002106	1.3746	CCNB2_ANGJA G2/mitotic-specific cyclin-B2 OS=Anguilla japonica OX=7937 GN=ccnb2 PE=2 SV=1
contig_7dpi0016305	4.86881	TE2IP_DANRE Telomeric repeat-binding factor 2-interacting protein 1 OS=Danio rerio OX=7955 GN=terf2ip PE=2 SV=2
contig_7dpi0026031		not available
contig_7dpi0135963	1.10903	IPRI_TAKRU Inositol 1,4,5-trisphosphate receptor-interacting protein OS=Takifugu rubripes OX=31033 GN=itprip PE=3 SV=1
contig_7dpi0008085	0.202396	SMS2_ONCMY Somatostatin-2 OS=Oncorhynchus mykiss OX=8022 GN=sst2 PE=3 SV=1
contig_7dpi0198666	2.70731	FAD1_DANRE FAD synthase OS=Danio rerio OX=7955 GN=flad1 PE=2 SV=1
contig_7dpi0003829	0.823532	DLG1L_DANRE Discs large homolog 1-like protein OS=Danio rerio OX=7955 GN=dlg1l PE=2 SV=1
contig_7dpi0122236	2.39229	MED27_DANRE Mediator of RNA polymerase II transcription subunit 27 OS=Danio rerio OX=7955 GN=med27 PE=2 SV=1
contig_7dpi0003645	5.1446	DLLC_DANRE Delta-like protein C OS=Danio rerio OX=7955 GN=dlc PE=2 SV=1
contig_7dpi0014424	0.270866	MFD4A_DANRE Major facilitator superfamily domain-containing protein 4A OS=Danio rerio OX=7955 GN=mfsd4a PE=2 SV=1
contig_7dpi0201729	0.802286	JMY_DANRE Junction-mediating and -regulatory protein OS=Danio rerio OX=7955 GN=jmy PE=2 SV=1
contig_7dpi0045560	1.02714	PDE11_TAKRU Dual 3',5'-cyclic-AMP and -GMP phosphodiesterase 11A OS=Takifugu rubripes OX=31033 GN=pde11a PE=3 SV=1
contig_7dpi0168140	5.03307	TPC11_DANRE Trafficking protein particle complex subunit 11 OS=Danio rerio OX=7955 GN=trappc11 PE=2 SV=1
contig_7dpi0042058	1.38679	NU4M_FORLA NADH-ubiquinone oxidoreductase chain 4 OS=Formosania lacustris OX=7980 GN=MT-ND4 PE=3 SV=1
contig_7dpi0079037	0.136911	COQ6_DANRE Ubiquinone biosynthesis monooxygenase COQ6, mitochondrial OS=Danio rerio OX=7955 GN=coq6 PE=2 SV=1
contig_7dpi0335878	0.236555	RELCH_DANRE RAB11-binding protein RELCH homolog OS=Danio rerio OX=7955 GN=relch PE=2 SV=1
contig_7dpi0093076	0.100599	PP4R3_DANRE Serine/threonine-protein phosphatase 4 regulatory subunit 3 OS=Danio rerio OX=7955 GN=smek1 PE=1 SV=1
contig_7dpi0127825	1.26612	S39A1_DANRE Zinc transporter ZIP1 OS=Danio rerio OX=7955 GN=slc39a1 PE=2 SV=1
contig_7dpi0001001	0.380868	TSN33_DANRE Tetraspanin-33 OS=Danio rerio OX=7955 GN=tspan33 PE=2 SV=1
contig_7dpi0119084	0.0694313	HPPD_DANRE 4-hydroxyphenylpyruvate dioxygenase OS=Danio rerio OX=7955 GN=hpd PE=2 SV=1
contig_7dpi0026920	3.59962	JMJD4_DANRE 2-oxoglutarate and iron-dependent oxygenase JMJD4 OS=Danio rerio OX=7955 GN=jmjd4 PE=2 SV=1
contig_7dpi0026472		not available
contig_7dpi0003162	1.88119	AP2D_DANRE Transcription factor AP-2-delta OS=Danio rerio OX=7955 GN=tfap2d PE=2 SV=1
contig_7dpi0373271	1.08733	LYSM4_DANRE LysM and putative peptidoglycan-binding domain-containing protein 4 OS=Danio rerio OX=7955 GN=lysmd4 PE=2 SV=2
contig_7dpi0026912	2.5084	FGFR4_DANRE Fibroblast growth factor receptor 4 OS=Danio rerio OX=7955 GN=fgfr4 PE=1 SV=1
contig_7dpi0033389	0.771227	KEP1A_DANRE Kelch-like ECH-associated protein 1A OS=Danio rerio OX=7955 GN=keap1a PE=1 SV=1
contig_7dpi0090138	0.243863	SMR8A_DANRE Guanine nucleotide exchange protein smcr8a OS=Danio rerio OX=7955 GN=smcr8a PE=3 SV=1
contig_7dpi0052960	3.3034	GARE1_DANRE GRB2-associated and regulator of MAPK protein 1 OS=Danio rerio OX=7955 GN=garem1 PE=2 SV=1
contig_7dpi0268005	0.923105	HIUH_DANRE 5-hydroxyisourate hydrolase OS=Danio rerio OX=7955 GN=urah PE=1 SV=1
contig_7dpi0181500	9.63255	HXB3A_DANRE Homeobox protein Hox-B3a OS=Danio rerio OX=7955 GN=hoxb3a PE=2 SV=3
contig_7dpi0007355	0.502096	WN10A_DANRE Protein Wnt-10a OS=Danio rerio OX=7955 GN=wnt10a PE=1 SV=1
contig_7dpi0103677	0.949467	S38A9_DANRE Sodium-coupled neutral amino acid transporter 9 OS=Danio rerio OX=7955 GN=slc38a9 PE=1 SV=1
contig_7dpi0009374	0.477566	TEN3_DANRE Teneurin-3 OS=Danio rerio OX=7955 GN=tenm3 PE=2 SV=2
contig_7dpi0018222	7.26041	PK1IP_DANRE p21-activated protein kinase-interacting protein 1-like OS=Danio rerio OX=7955 GN=pak1ip1 PE=2 SV=1
contig_7dpi0062653	0.228278	AGRV1_DANRE Adhesion G-protein coupled receptor V1 OS=Danio rerio OX=7955 GN=adgrv1 PE=2 SV=1
contig_7dpi0008155		not available
contig_7dpi0335159	0.23758	DISP2_DANRE Protein dispatched homolog 2 OS=Danio rerio OX=7955 GN=disp2 PE=2 SV=1
contig_7dpi0001210	1.11015	GILT_CARAU Gamma-interferon-inducible lysosomal thiol reductase OS=Carassius auratus OX=7957 GN=ifi30 PE=1 SV=1
contig_7dpi0053668	1.98739	TPST1_DANRE Protein-tyrosine sulfotransferase 1 OS=Danio rerio OX=7955 GN=tpst1 PE=2 SV=2
contig_7dpi0027327	0.283936	ILVBL_DANRE Acetolactate synthase-like protein OS=Danio rerio OX=7955 GN=ilvbl PE=2 SV=1
contig_7dpi0021375	0.237236	TRIO_DANRE Triple functional domain protein OS=Danio rerio OX=7955 GN=trio PE=3 SV=1
contig_7dpi0008156	6.21749	NOL11_DANRE Nucleolar protein 11-like OS=Danio rerio OX=7955 GN=nol11 PE=2 SV=1
contig_7dpi0029095	0.630547	S38A9_DANRE Sodium-coupled neutral amino acid transporter 9 OS=Danio rerio OX=7955 GN=slc38a9 PE=1 SV=1
contig_7dpi0000196	0.802856	NUP35_DANRE Nucleoporin NUP35 OS=Danio rerio OX=7955 GN=nup35 PE=1 SV=1
contig_7dpi0061858	2.15496	CRA1A_DANRE Collagen alpha-1(XXVII) chain A OS=Danio rerio OX=7955 GN=col27a1a PE=2 SV=1
contig_7dpi0009913	1.00974	NSMF_DANRE NMDA receptor synaptonuclear signaling and neuronal migration factor OS=Danio rerio OX=7955 GN=nsmf PE=2 SV=1
contig_7dpi0000099	5.60743	MFS6L_DANRE Major facilitator superfamily domain-containing protein 6-like OS=Danio rerio OX=7955 GN=mfsd6l PE=2 SV=1
contig_7dpi0038890	2.49381	SSRL_TAKRU Somatostatin-like receptor F_48D10.1 OS=Takifugu rubripes OX=31033 GN=F_48D10.1 PE=3 SV=1
contig_7dpi0011908	0.30249	EGR1_DANRE Early growth response protein 1 OS=Danio rerio OX=7955 GN=egr1 PE=2 SV=2
contig_7dpi0006546	3.08154	PTPRU_DANRE Receptor-type tyrosine-protein phosphatase U OS=Danio rerio OX=7955 GN=ptpru PE=2 SV=1
contig_7dpi0346451	3.50385	DLX4A_DANRE Homeobox protein Dlx4a OS=Danio rerio OX=7955 GN=dlx4a PE=2 SV=1
contig_7dpi0001044	1.38584	SPEG_DANRE Striated muscle preferentially expressed protein kinase OS=Danio rerio OX=7955 GN=speg PE=2 SV=1
contig_7dpi0095972	1.91753	P4K2B_DANRE Phosphatidylinositol 4-kinase type 2-beta OS=Danio rerio OX=7955 GN=pi4k2b PE=2 SV=1
contig_7dpi0003742	1.33119	NOC4L_DANRE Nucleolar complex protein 4 homolog OS=Danio rerio OX=7955 GN=noc4l PE=2 SV=1
contig_7dpi0061778	0.850086	ACY3B_DANRE N-acyl-aromatic-L-amino acid amidohydrolase (carboxylate-forming) B OS=Danio rerio OX=7955 GN=acy3.2 PE=2 SV=1
contig_7dpi0075162	0.0357705	KLHL3_DANRE Kelch-like protein 3 OS=Danio rerio OX=7955 GN=klhl3 PE=3 SV=1
contig_7dpi0016181	3.1728	NUP88_DANRE Nucleoporin 88 OS=Danio rerio OX=7955 GN=nup88 PE=1 SV=1
contig_7dpi0005100	0.217792	NLRC5_ICTPU Protein NLRC5 OS=Ictalurus punctatus OX=7998 GN=nlrc5 PE=2 SV=1
contig_7dpi0043403	7.10327	NR2F5_DANRE Nuclear receptor subfamily 2 group F member 5 OS=Danio rerio OX=7955 GN=nr2f5 PE=2 SV=1
contig_7dpi0002569	1.96441	SCAR5_DANRE Scavenger receptor class A member 5 OS=Danio rerio OX=7955 GN=scara5 PE=3 SV=1
contig_7dpi0138293	0.395859	CELF4_DANRE CUGBP Elav-like family member 4 OS=Danio rerio OX=7955 GN=celf4 PE=2 SV=1
contig_7dpi0246900	1.2597	SAND_TAKRU Protein SAND OS=Takifugu rubripes OX=31033 GN=sand PE=3 SV=1
contig_7dpi0008467	0.263539	TRI13_DANRE Tripartite motif-containing 13 OS=Danio rerio OX=7955 GN=trim13 PE=2 SV=1
contig_7dpi0029659	2.95342	FAN1_DANRE Fanconi-associated nuclease 1 OS=Danio rerio OX=7955 GN=fan1 PE=2 SV=2
contig_7dpi0111075		not available
contig_7dpi0002053	0.383609	SPF27_DANRE Pre-mRNA-splicing factor SPF27 OS=Danio rerio OX=7955 GN=bcas2 PE=2 SV=1
contig_7dpi0409271	0.631973	AT2A1_MAKNI Sarcoplasmic/endoplasmic reticulum calcium ATPase 1 OS=Makaira nigricans OX=13604 GN=atp2a1 PE=2 SV=2
contig_7dpi0019604	1.28007	SPEG_DANRE Striated muscle preferentially expressed protein kinase OS=Danio rerio OX=7955 GN=speg PE=2 SV=1
contig_7dpi0069434	2.59753	ASCC3_DANRE Activating signal cointegrator 1 complex subunit 3 OS=Danio rerio OX=7955 GN=ascc3 PE=3 SV=2
contig_7dpi0008076	4.69986e-124	MYSS_CYPCA Myosin heavy chain, fast skeletal muscle OS=Cyprinus carpio OX=7962 PE=2 SV=2
contig_7dpi0008874	1.20754	ZN423_DANRE Zinc finger protein 423 OS=Danio rerio OX=7955 GN=znf423 PE=2 SV=1
contig_7dpi0142860	0.30182	VPS25_DANRE Vacuolar protein-sorting-associated protein 25 OS=Danio rerio OX=7955 GN=vps25 PE=2 SV=2
contig_7dpi0021081	0.00248618	TXB1B_DANRE Tax1-binding protein 1 homolog B OS=Danio rerio OX=7955 GN=tax1bp1b PE=2 SV=3
contig_7dpi0044582	0.425416	WDR75_DANRE WD repeat-containing protein 75 OS=Danio rerio OX=7955 GN=wdr75 PE=2 SV=2
contig_7dpi0010663	0.401948	NLRC5_ICTPU Protein NLRC5 OS=Ictalurus punctatus OX=7998 GN=nlrc5 PE=2 SV=1
contig_7dpi0018291	0.148878	FEM1C_DANRE Protein fem-1 homolog C OS=Danio rerio OX=7955 GN=fem1c PE=2 SV=2
contig_7dpi0022528	2.10761	STXA_SYNVE Neoverrucotoxin subunit alpha OS=Synanceia verrucosa OX=51996 PE=1 SV=1
contig_7dpi0066564		not available
contig_7dpi0160700	0.882913	TMC2A_DANRE Transmembrane channel-like protein 2-A OS=Danio rerio OX=7955 GN=tmc2a PE=1 SV=2
contig_7dpi0030512	0.171545	MFSD8_DANRE Major facilitator superfamily domain-containing protein 8 OS=Danio rerio OX=7955 GN=mfsd8 PE=2 SV=1
contig_7dpi0056335	3.70061	PPR21_DANRE Protein phosphatase 1 regulatory subunit 21 OS=Danio rerio OX=7955 GN=ppp1r21 PE=2 SV=1
contig_7dpi0015854	1.06481	HEPC1_SALSA Hepcidin-1 OS=Salmo salar OX=8030 GN=hamp1 PE=3 SV=1
contig_7dpi0004599	0.000919972	B2MG_PAROL Beta-2-microglobulin OS=Paralichthys olivaceus OX=8255 GN=b2m PE=3 SV=1
contig_7dpi0000212	7.96831e-75	AGRL4_DANRE Adhesion G protein-coupled receptor L4 OS=Danio rerio OX=7955 GN=adgrl4 PE=2 SV=2
contig_7dpi0009616	6.0125e-74	DDIT4_DANRE DNA damage-inducible transcript 4 protein OS=Danio rerio OX=7955 GN=ddit4 PE=2 SV=1
contig_7dpi0406791	0.580048	PHOP1_DANRE Probable phosphatase phospho1 OS=Danio rerio OX=7955 GN=phospho1 PE=2 SV=1
contig_7dpi0392739	0.191294	PCX1_TAKRU Pecanex-like protein 1 OS=Takifugu rubripes OX=31033 GN=pcnx1 PE=3 SV=1
contig_7dpi0028853		not available
contig_7dpi0045147	2.85129	DND1_DANRE Dead end protein 1 OS=Danio rerio OX=7955 GN=dnd PE=1 SV=1
contig_7dpi0163036	1.05451	ZNRF3_DANRE E3 ubiquitin-protein ligase znrf3 OS=Danio rerio OX=7955 GN=znrf3 PE=1 SV=2
contig_7dpi0685317	0.0896171	EPB4B_DANRE Ephrin type-B receptor 4b OS=Danio rerio OX=7955 GN=ephb4b PE=2 SV=2
contig_7dpi0004178	1.38789e-56	CADH2_DANRE Cadherin-2 OS=Danio rerio OX=7955 GN=cdh2 PE=1 SV=2
contig_7dpi0268802		not available
contig_7dpi0005511	8.5032	GDF6A_DANRE Growth/differentiation factor 6-A OS=Danio rerio OX=7955 GN=gdf6a PE=1 SV=1
contig_7dpi0058927	1.10269	SSRL_TAKRU Somatostatin-like receptor F_48D10.1 OS=Takifugu rubripes OX=31033 GN=F_48D10.1 PE=3 SV=1
contig_7dpi0118713	0.0598629	ZNT6_DANRE Zinc transporter 6 OS=Danio rerio OX=7955 GN=slc30a6 PE=2 SV=1
contig_7dpi0000256	6.02548e-09	DLLD_DANRE Delta-like protein D OS=Danio rerio OX=7955 GN=dld PE=1 SV=2
contig_7dpi0008195	0	ARP2A_DANRE Actin-related protein 2-A OS=Danio rerio OX=7955 GN=actr2a PE=2 SV=1
contig_7dpi0042586	0.232145	RFA1_DANRE Replication protein A 70 kDa DNA-binding subunit OS=Danio rerio OX=7955 GN=rpa1 PE=1 SV=1
contig_7dpi0086244	0.901995	LNPB_TAKRU Endoplasmic reticulum junction formation protein lunapark-B OS=Takifugu rubripes OX=31033 GN=lnpkb PE=3 SV=1
contig_7dpi0125950	0.0690005	YAP1_DANRE Transcriptional coactivator YAP1 OS=Danio rerio OX=7955 GN=yap1 PE=2 SV=2
contig_7dpi0254139	1.06399	XMRK_XIPMA Melanoma receptor tyrosine-protein kinase OS=Xiphophorus maculatus OX=8083 GN=xmrk PE=2 SV=2
contig_7dpi0020421	9.20253e-09	MYSS_CYPCA Myosin heavy chain, fast skeletal muscle OS=Cyprinus carpio OX=7962 PE=2 SV=2
contig_7dpi0001503	7.19839	HACD3_DANRE Very-long-chain (3R)-3-hydroxyacyl-CoA dehydratase OS=Danio rerio OX=7955 GN=hacd3 PE=2 SV=2
contig_7dpi0034188	1.71507	WNT2_DANRE Protein Wnt-2 OS=Danio rerio OX=7955 GN=wnt2 PE=2 SV=1
contig_7dpi0062022		not available
contig_7dpi0023871	0.295474	PIWL1_DANRE Piwi-like protein 1 OS=Danio rerio OX=7955 GN=piwil1 PE=1 SV=1
contig_7dpi0011323	1.4725	PLCX1_DANRE PI-PLC X domain-containing protein 1 OS=Danio rerio OX=7955 GN=plcxd1 PE=2 SV=1
contig_7dpi0021199		not available
contig_7dpi0015675	0.850086	ACY3B_DANRE N-acyl-aromatic-L-amino acid amidohydrolase (carboxylate-forming) B OS=Danio rerio OX=7955 GN=acy3.2 PE=2 SV=1
contig_7dpi0123842	3.80219	2ABD_DANRE Serine/threonine-protein phosphatase 2A 55 kDa regulatory subunit B delta isoform OS=Danio rerio OX=7955 GN=ppp2r2d PE=2 SV=1
contig_7dpi0018768		not available
contig_7dpi0138395	3.95048	PZR3B_DANRE E3 ubiquitin-protein ligase PDZRN3-B OS=Danio rerio OX=7955 GN=pdzrn3b PE=1 SV=1
contig_7dpi0025691	0.000936383	INVS_DANRE Inversin OS=Danio rerio OX=7955 GN=invs PE=2 SV=1
contig_7dpi0014384	2.17073e-15	TEN4_DANRE Teneurin-4 OS=Danio rerio OX=7955 GN=tenm4 PE=2 SV=1
contig_7dpi0025177		not available
contig_7dpi0076025	0.808259	EPA4A_DANRE Ephrin type-A receptor 4a (Fragment) OS=Danio rerio OX=7955 GN=epha4a PE=2 SV=1
contig_7dpi0016599	4.1346	AUP1_DANRE Ancient ubiquitous protein 1 OS=Danio rerio OX=7955 GN=aup1 PE=2 SV=2
contig_7dpi0024752	2.75367	RARA_TAKRU Retinoic acid receptor alpha OS=Takifugu rubripes OX=31033 GN=rara PE=2 SV=1
contig_7dpi0002264	1.93602e-76	MYSS_CYPCA Myosin heavy chain, fast skeletal muscle OS=Cyprinus carpio OX=7962 PE=2 SV=2
contig_7dpi0001024	2.26802	AT2B2_OREMO Plasma membrane calcium-transporting ATPase 2 (Fragment) OS=Oreochromis mossambicus OX=8127 GN=atp2b2 PE=2 SV=1
contig_7dpi0110553	2.77465	CHY1_PAGMA Chrysophsin-1 OS=Pagrus major OX=143350 PE=1 SV=1
contig_7dpi0028855	5.10067	LDB1A_DANRE LIM domain-binding protein 1-A OS=Danio rerio OX=7955 GN=ldb1a PE=2 SV=1
contig_7dpi0009513	0.429178	LRWD1_DANRE Leucine-rich repeat and WD repeat-containing protein 1 OS=Danio rerio OX=7955 GN=lrwd1 PE=1 SV=1
contig_7dpi0016208	1.39583	RL13A_SALTR 60S ribosomal protein L13a (Fragment) OS=Salmo trutta OX=8032 GN=rpl13a PE=2 SV=1
contig_7dpi0165876	2.00735	MYRIP_DANRE Rab effector MyRIP OS=Danio rerio OX=7955 GN=myrip PE=1 SV=1
contig_7dpi0015444	1.6588	THIL_DANRE Acetyl-CoA acetyltransferase, mitochondrial OS=Danio rerio OX=7955 GN=acat1 PE=2 SV=1
contig_7dpi0125302	0.0558838	CYB_SYNMA Cytochrome b OS=Synbranchus marmoratus OX=181452 GN=mt-cyb PE=3 SV=1
contig_7dpi0100812	2.73749	DBX1A_DANRE Homeobox protein DBX1-A OS=Danio rerio OX=7955 GN=dbx1a PE=2 SV=1
contig_7dpi0000301	6.50865e-11	FSD1_DANRE Fibronectin type III and SPRY domain-containing protein 1 OS=Danio rerio OX=7955 GN=fsd1 PE=3 SV=1
contig_7dpi0017850	3.98808	PTPRC_CYPCA Receptor-type tyrosine-protein phosphatase C OS=Cyprinus carpio OX=7962 GN=ptprc PE=2 SV=1
contig_7dpi0074048	3.01712	PPR37_DANRE Protein phosphatase 1 regulatory subunit 37 OS=Danio rerio OX=7955 GN=ppp1r37 PE=2 SV=1
contig_7dpi0014989	7.75893	MBB1A_DANRE Myb-binding protein 1A-like protein OS=Danio rerio OX=7955 GN=mybbp1a PE=1 SV=1
contig_7dpi0023372		not available
contig_7dpi0009159	1.10048	RADIL_DANRE Ras-associating and dilute domain-containing protein OS=Danio rerio OX=7955 GN=radil PE=2 SV=1
contig_7dpi0015479	7.85168e-17	CNT1A_DANRE Contactin-1a OS=Danio rerio OX=7955 GN=cntn1a PE=2 SV=1
contig_7dpi0022269	7.10001e-11	APJB_DANRE Apelin receptor B OS=Danio rerio OX=7955 GN=aplnrb PE=1 SV=1
contig_7dpi0070628	0.365558	TIM13_DANRE Mitochondrial import inner membrane translocase subunit Tim13 OS=Danio rerio OX=7955 GN=timm13 PE=3 SV=1
contig_7dpi0042422	0.767352	CLP1_DANRE Polyribonucleotide 5'-hydroxyl-kinase Clp1 OS=Danio rerio OX=7955 GN=clp1 PE=1 SV=1
contig_7dpi0028841	0.308557	GRID2_DANRE Glutamate receptor ionotropic, delta-2 OS=Danio rerio OX=7955 GN=grid2 PE=2 SV=1
contig_7dpi0077246	0.247481	UBP44_DANRE Ubiquitin carboxyl-terminal hydrolase 44 OS=Danio rerio OX=7955 GN=usp44 PE=2 SV=1
contig_7dpi0011699	0.602103	HBB1_ONCMY Hemoglobin subunit beta-1 OS=Oncorhynchus mykiss OX=8022 GN=hbb1 PE=1 SV=1
contig_7dpi0009231	1.38868e-115	MBN2A_TAKRU Muscleblind-like protein 2a OS=Takifugu rubripes OX=31033 GN=mbnl2a PE=2 SV=1
contig_7dpi0038831	7.23358	NIPLA_DANRE Nipped-B-like protein A OS=Danio rerio OX=7955 GN=nipbla PE=2 SV=1
contig_7dpi0061742	0.321105	NDUA4_DANRE Cytochrome c oxidase subunit NDUFA4 OS=Danio rerio OX=7955 GN=ndufa4 PE=3 SV=1
contig_7dpi0070409	1.59398	EDC3_DANRE Enhancer of mRNA-decapping protein 3 OS=Danio rerio OX=7955 GN=edc3 PE=1 SV=1
contig_7dpi0088783	6.18244	CCND1_DANRE G1/S-specific cyclin-D1 OS=Danio rerio OX=7955 GN=ccnd1 PE=2 SV=1
contig_7dpi0031198	1.22242e-71	NR2F5_DANRE Nuclear receptor subfamily 2 group F member 5 OS=Danio rerio OX=7955 GN=nr2f5 PE=2 SV=1
contig_7dpi0029081	0.065338	EFGM_DANRE Elongation factor G, mitochondrial OS=Danio rerio OX=7955 GN=gfm1 PE=2 SV=1
contig_7dpi0054697	0.972373	ANS1B_DANRE Ankyrin repeat and sterile alpha motif domain-containing protein 1B OS=Danio rerio OX=7955 GN=anks1b PE=3 SV=1
contig_7dpi0037568	1.42437e-19	MYSS_CYPCA Myosin heavy chain, fast skeletal muscle OS=Cyprinus carpio OX=7962 PE=2 SV=2
contig_7dpi0014071	9.58943e-54	SRS1A_DANRE Serine/arginine-rich splicing factor 1A OS=Danio rerio OX=7955 GN=srsf1a PE=2 SV=2
contig_7dpi0030208	1.07898	LS12B_DANRE Protein LSM12 homolog B OS=Danio rerio OX=7955 GN=lsm12b PE=2 SV=1
contig_7dpi0078169	0.403629	FCHO1_DANRE F-BAR domain only protein 1 OS=Danio rerio OX=7955 GN=fcho1 PE=1 SV=2
contig_7dpi0033179	1.7314	CBPE_LOPAM Carboxypeptidase E OS=Lophius americanus OX=8073 GN=cpe PE=2 SV=1
contig_7dpi0229339	0.119841	UN45B_DANRE Protein unc-45 homolog B OS=Danio rerio OX=7955 GN=unc45b PE=1 SV=2
contig_7dpi0034404	0.481438	ARCH_DANRE Protein archease OS=Danio rerio OX=7955 GN=zbtb8os PE=2 SV=2
contig_7dpi0016633	8.60473e-10	NPHP3_DANRE Nephrocystin-3 OS=Danio rerio OX=7955 GN=nphp3 PE=3 SV=1
contig_7dpi0000320	0.212579	PKD2_ORYLA Polycystin-2 OS=Oryzias latipes OX=8090 GN=pkd2 PE=1 SV=2
contig_7dpi0155213		not available
contig_7dpi0006739	1.69748	IQCH_DANRE IQ motif-containing protein H OS=Danio rerio OX=7955 GN=iqch PE=4 SV=1
contig_7dpi0046081	0.666213	ZPLD1_SALSA Zona pellucida-like domain-containing protein 1 OS=Salmo salar OX=8030 GN=zpld1 PE=1 SV=1
contig_7dpi0117141	0.267008	RHG29_DANRE Rho GTPase-activating protein 29 OS=Danio rerio OX=7955 GN=arhgap29 PE=2 SV=1
contig_7dpi0024123	1.92992	MB211_DANRE Putative nucleotidyltransferase MAB21L1 OS=Danio rerio OX=7955 GN=mab21l1 PE=2 SV=1
contig_7dpi0011624	0.0253381	RS3_ICTPU 40S ribosomal protein S3 OS=Ictalurus punctatus OX=7998 GN=rps3 PE=2 SV=1
contig_7dpi0016859		not available
contig_7dpi0111965	1.18062	PTCD3_DANRE Pentatricopeptide repeat domain-containing protein 3, mitochondrial OS=Danio rerio OX=7955 GN=ptcd3 PE=2 SV=1
contig_7dpi0146049		not available
contig_7dpi0306751	0.144104	NOL10_DANRE Nucleolar protein 10 OS=Danio rerio OX=7955 GN=nol10 PE=2 SV=1
contig_7dpi0008491	1.16632	DCA13_DANRE DDB1- and CUL4-associated factor 13 OS=Danio rerio OX=7955 GN=dcaf13 PE=2 SV=1
contig_7dpi0123734		not available
contig_7dpi0028565	0.0365524	TRIPC_DANRE E3 ubiquitin-protein ligase TRIP12 OS=Danio rerio OX=7955 GN=trip12 PE=3 SV=1
contig_7dpi0168169	5.06933	MSTO1_DANRE Protein misato homolog 1 OS=Danio rerio OX=7955 GN=msto1 PE=2 SV=1
contig_7dpi0008880	0.654137	HBB_SILAS Hemoglobin subunit beta OS=Silurus asotus OX=30991 GN=hbb PE=2 SV=2
contig_7dpi0050175		not available
contig_7dpi0111179	0.838421	KDISB_DANRE Kinase D-interacting substrate of 220 kDa B OS=Danio rerio OX=7955 GN=kidins220b PE=1 SV=3
contig_7dpi0019371	1.16027e-30	HV05_CARAU Ig heavy chain V region 5A OS=Carassius auratus OX=7957 PE=4 SV=1
contig_7dpi0021071	1.97333e-29	KERA_DANRE Keratocan OS=Danio rerio OX=7955 GN=kera PE=1 SV=1
contig_7dpi0004116	0.00137413	DNMBP_DANRE Dynamin-binding protein OS=Danio rerio OX=7955 GN=dnmbp PE=2 SV=1
contig_7dpi0077222	0.634854	CP11A_ONCMY Cholesterol side-chain cleavage enzyme, mitochondrial OS=Oncorhynchus mykiss OX=8022 GN=cyp11a1 PE=2 SV=1
contig_7dpi0019503	9.59691	MINY3_DANRE Ubiquitin carboxyl-terminal hydrolase MINDY-3 OS=Danio rerio OX=7955 GN=mindy3 PE=2 SV=1
contig_7dpi0046556	0.00837814	CYB_INDPA Cytochrome b OS=Indostomus paradoxus OX=181450 GN=mt-cyb PE=3 SV=1
contig_7dpi0013184	1.24899e-06	NECT3_DANRE Nectin-3-like protein OS=Danio rerio OX=7955 GN=nectin3 PE=2 SV=2
contig_7dpi0021882	8.87188e-72	BI1_PAROL Probable Bax inhibitor 1 OS=Paralichthys olivaceus OX=8255 GN=tmbim6 PE=2 SV=1
contig_7dpi0038643	0.25961	COPG2_TAKRU Coatomer subunit gamma-2 OS=Takifugu rubripes OX=31033 GN=copg2 PE=3 SV=1
contig_7dpi0078880	0.270201	PTPRF_DANRE Receptor-type tyrosine-protein phosphatase F OS=Danio rerio OX=7955 GN=ptprf PE=2 SV=1
contig_7dpi0035745	2.17352	AEP1_DANRE Aerolysin-like protein OS=Danio rerio OX=7955 GN=aep1 PE=1 SV=1
contig_7dpi0005698	2.81861e-108	CCND1_DANRE G1/S-specific cyclin-D1 OS=Danio rerio OX=7955 GN=ccnd1 PE=2 SV=1
contig_7dpi0021625	0.720223	EXT1B_DANRE Exostosin-1b OS=Danio rerio OX=7955 GN=ext1b PE=2 SV=1
contig_7dpi0054801		not available
contig_7dpi0050946	3.12625e-07	NLRC5_ICTPU Protein NLRC5 OS=Ictalurus punctatus OX=7998 GN=nlrc5 PE=2 SV=1
contig_7dpi0046846	0.000270902	TYRO3_DANRE Tyrosine-protein kinase receptor TYRO3 OS=Danio rerio OX=7955 GN=tyro3 PE=2 SV=1
contig_7dpi0061133	0.621534	S38A9_DANRE Sodium-coupled neutral amino acid transporter 9 OS=Danio rerio OX=7955 GN=slc38a9 PE=1 SV=1
contig_7dpi0158493		not available
contig_7dpi0035766	1.17052	DEP1A_DANRE DEP domain-containing protein 1A OS=Danio rerio OX=7955 GN=depdc1a PE=2 SV=1
contig_7dpi0012461	3.56913	NXPE3_DANRE NXPE family member 3 OS=Danio rerio OX=7955 GN=nxpe3 PE=2 SV=1
contig_7dpi0001397	1.78817e-47	PTPRC_CYPCA Receptor-type tyrosine-protein phosphatase C OS=Cyprinus carpio OX=7962 GN=ptprc PE=2 SV=1
contig_7dpi0050740	0.400916	PGFRB_TAKRU Platelet-derived growth factor receptor beta OS=Takifugu rubripes OX=31033 GN=pdgfrb PE=3 SV=1
contig_7dpi0023433	1.38515	KFA_DANRE Kynurenine formamidase OS=Danio rerio OX=7955 GN=afmid PE=2 SV=2
contig_7dpi0037581	0.872278	OPA1_ONCMA Dynamin-like 120 kDa protein, mitochondrial OS=Oncorhynchus masou OX=8020 GN=opa1 PE=2 SV=1
contig_7dpi0028608	0.929269	APMAP_DANRE Adipocyte plasma membrane-associated protein OS=Danio rerio OX=7955 GN=apmap PE=2 SV=1
contig_7dpi0031227	1.34273e-126	MBN2A_TAKRU Muscleblind-like protein 2a OS=Takifugu rubripes OX=31033 GN=mbnl2a PE=2 SV=1
contig_7dpi0009849	0.769985	DIX1A_DANRE Dixin-A OS=Danio rerio OX=7955 GN=dixdc1a PE=1 SV=1
contig_7dpi0012527	9.02979e-08	UN93A_DANRE Protein unc-93 homolog A OS=Danio rerio OX=7955 GN=unc93a PE=3 SV=1
contig_7dpi0014823	0.532598	KBP_DANRE KIF-binding protein OS=Danio rerio OX=7955 GN=kifbp PE=2 SV=1
contig_7dpi0025228	0.813158	DEN5B_DANRE DENN domain-containing protein 5B OS=Danio rerio OX=7955 GN=dennd5b PE=2 SV=2
contig_7dpi0108964	2.81529	GPRX_ORYLA Probable G-protein coupled receptor (Fragment) OS=Oryzias latipes OX=8090 PE=3 SV=1
contig_7dpi0040983	0.781827	FX1AA_DANRE Forkhead box protein O1-A OS=Danio rerio OX=7955 GN=foxo1a PE=2 SV=1
contig_7dpi0028211		not available
contig_7dpi0048621	1.28928e-20	OPTN_DANRE Optineurin OS=Danio rerio OX=7955 GN=optn PE=2 SV=2
contig_7dpi0025497	4.20164e-09	GPR54_ORENI G-protein coupled receptor 54 OS=Oreochromis niloticus OX=8128 GN=gpr54 PE=2 SV=1
contig_7dpi0017392	5.63956	NLS1A_DANRE Sodium-dependent lysophosphatidylcholine symporter 1-A OS=Danio rerio OX=7955 GN=mfsd2aa PE=2 SV=1
contig_7dpi0020641	1.4346e-69	STK3_DANRE Serine/threonine-protein kinase 3 OS=Danio rerio OX=7955 GN=stk3 PE=2 SV=1
contig_7dpi0022880	0.419587	ENDOU_PAROL Poly(U)-specific endoribonuclease OS=Paralichthys olivaceus OX=8255 GN=endou PE=2 SV=1
contig_7dpi0047737	1.14733e-05	FGR1A_DANRE Fibroblast growth factor receptor 1-A OS=Danio rerio OX=7955 GN=fgfr1a PE=1 SV=2
contig_7dpi0044581	0.248873	WDR92_DANRE WD repeat-containing protein 92 OS=Danio rerio OX=7955 GN=wdr92 PE=2 SV=1
contig_7dpi0047160	1.25521e-06	IMA6_DANRE Importin subunit alpha-6 OS=Danio rerio OX=7955 GN=kpna5 PE=2 SV=2
contig_7dpi0108167	2.92876	FIGN_DANRE Fidgetin OS=Danio rerio OX=7955 GN=fign PE=2 SV=1
contig_7dpi0055729		not available
contig_7dpi0076711	5.30018	T179A_DANRE Transmembrane protein 179 OS=Danio rerio OX=7955 GN=tmem179 PE=2 SV=1
contig_7dpi0023878	0.161186	ZWILC_DANRE Protein zwilch homolog OS=Danio rerio OX=7955 GN=zwilch PE=2 SV=1
contig_7dpi0196483	1.40321	BABA2_DANRE BRISC and BRCA1-A complex member 2 OS=Danio rerio OX=7955 GN=babam2 PE=2 SV=1
contig_7dpi0047725	9.31085e-168	BRD9_DANRE Bromodomain-containing protein 9 OS=Danio rerio OX=7955 GN=brd9 PE=2 SV=1
contig_7dpi0018322	1.09206	GLUC2_ONCMY Glucagon-2 OS=Oncorhynchus mykiss OX=8022 GN=gcg2 PE=2 SV=1
contig_7dpi0011872	3.38189	CXR32_DANRE C-X-C chemokine receptor type 3-2 OS=Danio rerio OX=7955 GN=cxcr3.2 PE=2 SV=2
contig_7dpi0101855	0.0277455	VANG2_DANRE Vang-like protein 2 OS=Danio rerio OX=7955 GN=vangl2 PE=1 SV=1
contig_7dpi0027294		not available
contig_7dpi0132816	0.704667	FBLN1_DANRE Fibulin-1 OS=Danio rerio OX=7955 GN=fbln1 PE=2 SV=1
contig_7dpi0051194	0.325698	TM201_DANRE Transmembrane protein 201 OS=Danio rerio OX=7955 GN=tmem201 PE=2 SV=1
contig_7dpi0035394	0.216539	EX3L1_DANRE Exocyst complex component 3-like protein OS=Danio rerio OX=7955 GN=exoc3l1 PE=2 SV=1
contig_7dpi0068595	4.657	SCRIB_DANRE Protein scribble homolog OS=Danio rerio OX=7955 GN=scrib PE=1 SV=1
contig_7dpi0039768	3.08191	COX1_GADMO Cytochrome c oxidase subunit 1 OS=Gadus morhua OX=8049 GN=mt-co1 PE=3 SV=1
contig_7dpi0063902		not available
contig_7dpi0073688	0.173825	S61A1_ONCMY Protein transport protein Sec61 subunit alpha isoform A OS=Oncorhynchus mykiss OX=8022 GN=sec61aa PE=2 SV=3
contig_7dpi0339014	0.627327	UBA5_DANRE Ubiquitin-like modifier-activating enzyme 5 OS=Danio rerio OX=7955 GN=uba5 PE=3 SV=2
contig_7dpi0033151	1.34153	F155B_DANRE Transmembrane protein FAM155B OS=Danio rerio OX=7955 GN=fam155b PE=2 SV=1
contig_7dpi0048903	1.14162	ANGE2_DANRE Protein angel homolog 2 OS=Danio rerio OX=7955 GN=angel2 PE=2 SV=1
contig_7dpi0017434	8.13564e-149	PACN1_DANRE Protein kinase C and casein kinase substrate in neurons protein 1 OS=Danio rerio OX=7955 GN=pacsin1b PE=1 SV=1
contig_7dpi0015577	2.72581	ZRN1B_DANRE Ubiquitin thioesterase zranb1-B OS=Danio rerio OX=7955 GN=zranb1b PE=2 SV=1
contig_7dpi0055884	9.68277	ERGI2_DANRE Endoplasmic reticulum-Golgi intermediate compartment protein 2 OS=Danio rerio OX=7955 GN=ergic2 PE=2 SV=1
contig_7dpi0048233	2.66211	H6ST2_DANRE Heparan-sulfate 6-O-sulfotransferase 2 OS=Danio rerio OX=7955 GN=hs6st2 PE=2 SV=2
contig_7dpi0111107	0.176323	PIHD1_DANRE PIH1 domain-containing protein 1 OS=Danio rerio OX=7955 GN=pih1d1 PE=2 SV=2
contig_7dpi0035391	0.241461	LYSM4_DANRE LysM and putative peptidoglycan-binding domain-containing protein 4 OS=Danio rerio OX=7955 GN=lysmd4 PE=2 SV=2
contig_7dpi0063755	0.000140139	UN93A_DANRE Protein unc-93 homolog A OS=Danio rerio OX=7955 GN=unc93a PE=3 SV=1
contig_7dpi0050362	2.69154	DRS7B_DANRE Dehydrogenase/reductase SDR family member 7B OS=Danio rerio OX=7955 GN=dhrs7b PE=2 SV=1
contig_7dpi0152171	3.19256	UBP33_DANRE Ubiquitin carboxyl-terminal hydrolase 33 OS=Danio rerio OX=7955 GN=usp33 PE=2 SV=1
contig_7dpi0145956	3.04384	GDF2_DANRE Growth/differentiation factor 2 OS=Danio rerio OX=7955 GN=gdf2 PE=2 SV=1
contig_7dpi0058787	0.976998	HD_TAKRU Huntingtin OS=Takifugu rubripes OX=31033 GN=htt PE=3 SV=1
contig_7dpi0070490		not available
contig_7dpi0002038	1.59809e-89	S38A2_DANRE Sodium-coupled neutral amino acid transporter 2 OS=Danio rerio OX=7955 GN=slc38a2 PE=3 SV=1
contig_7dpi0079079	0.00496837	KTU_DANRE Protein kintoun OS=Danio rerio OX=7955 GN=dnaaf2 PE=2 SV=1
contig_7dpi0013813	6.91074e-37	HV03_CARAU Ig heavy chain V region 3 OS=Carassius auratus OX=7957 PE=4 SV=1
contig_7dpi0046742	0	AT2A1_MAKNI Sarcoplasmic/endoplasmic reticulum calcium ATPase 1 OS=Makaira nigricans OX=13604 GN=atp2a1 PE=2 SV=2
contig_7dpi0099936	0.274755	TBA_ONCKE Tubulin alpha chain OS=Oncorhynchus keta OX=8018 PE=2 SV=2
contig_7dpi0012328	1.91002	ZN598_DANRE E3 ubiquitin-protein ligase ZNF598 OS=Danio rerio OX=7955 GN=znf598 PE=1 SV=2
contig_7dpi0105874		not available
contig_7dpi0038068	0.246622	XPO6_DANRE Exportin-6 OS=Danio rerio OX=7955 GN=xpo6 PE=2 SV=1
contig_7dpi0022095	2.80403e-05	CNT1A_DANRE Contactin-1a OS=Danio rerio OX=7955 GN=cntn1a PE=2 SV=1
contig_7dpi0061485	0.777765	LRIT2_DANRE Leucine-rich repeat, immunoglobulin-like domain and transmembrane domain-containing protein 2 OS=Danio rerio OX=7955 GN=lrit2 PE=2 SV=2
contig_7dpi0045496	0.0426117	NLRC5_ICTPU Protein NLRC5 OS=Ictalurus punctatus OX=7998 GN=nlrc5 PE=2 SV=1
contig_7dpi0008884	1.20312e-65	DDX46_DANRE Probable ATP-dependent RNA helicase DDX46 OS=Danio rerio OX=7955 GN=ddx46 PE=2 SV=1
contig_7dpi0230101	7.18872	CDHR1_DANRE Cadherin-related family member 1 OS=Danio rerio OX=7955 GN=cdhr1 PE=2 SV=1
contig_7dpi0328835	1.97743	HSP7C_ICTPU Heat shock cognate 71 kDa protein OS=Ictalurus punctatus OX=7998 GN=hsc70 PE=2 SV=1
contig_7dpi0092936	0.665446	R213B_DANRE E3 ubiquitin-protein ligase rnf213-beta OS=Danio rerio OX=7955 GN=rnf213b PE=3 SV=1
contig_7dpi0018305	3.96139	MTMRC_DANRE Myotubularin-related protein 12 OS=Danio rerio OX=7955 GN=mtmr12 PE=1 SV=1
contig_7dpi0021314	1.41923	DYTN_DANRE Dystrotelin OS=Danio rerio OX=7955 GN=dytn PE=2 SV=1
contig_7dpi0015892	3.3614e-05	B2MG_PAROL Beta-2-microglobulin OS=Paralichthys olivaceus OX=8255 GN=b2m PE=3 SV=1
contig_7dpi0004688	2.86619	PTER_TETNG Phosphotriesterase-related protein OS=Tetraodon nigroviridis OX=99883 GN=pter PE=3 SV=1
contig_7dpi0071765	0.11505	AGRV1_DANRE Adhesion G-protein coupled receptor V1 OS=Danio rerio OX=7955 GN=adgrv1 PE=2 SV=1
contig_7dpi0050826	1.55234	CR3L2_DANRE Cyclic AMP-responsive element-binding protein 3-like protein 2 OS=Danio rerio OX=7955 GN=creb3l2 PE=2 SV=1
contig_7dpi0013186	4.11664	SPEG_DANRE Striated muscle preferentially expressed protein kinase OS=Danio rerio OX=7955 GN=speg PE=2 SV=1
contig_7dpi0074917	0.0352804	S39A1_DANRE Zinc transporter ZIP1 OS=Danio rerio OX=7955 GN=slc39a1 PE=2 SV=1
contig_7dpi0021522	8.26752e-25	TMC2A_DANRE Transmembrane channel-like protein 2-A OS=Danio rerio OX=7955 GN=tmc2a PE=1 SV=2
contig_7dpi0001362	4.2606e-13	GULP1_DANRE PTB domain-containing engulfment adapter protein 1 OS=Danio rerio OX=7955 GN=gulp1 PE=2 SV=1
contig_7dpi0028857	3.26671	FGR1A_DANRE Fibroblast growth factor receptor 1-A OS=Danio rerio OX=7955 GN=fgfr1a PE=1 SV=2
contig_7dpi0051192	0.245995	CNR1B_TAKRU Cannabinoid receptor type 1B OS=Takifugu rubripes OX=31033 GN=cnr1b PE=3 SV=1
contig_7dpi0064006	2.70101	TBA_ONCKE Tubulin alpha chain OS=Oncorhynchus keta OX=8018 PE=2 SV=2
contig_7dpi0047471	1.26882	TGFB1_CYPCA Transforming growth factor beta-1 proprotein OS=Cyprinus carpio OX=7962 GN=tgfb1 PE=2 SV=1
contig_7dpi0013520	0.123962	MFD6A_DANRE Major facilitator superfamily domain-containing protein 6-A OS=Danio rerio OX=7955 GN=mfsd6a PE=3 SV=1
contig_7dpi0113595	0.0878586	OPSR2_DANRE Red-sensitive opsin-2 OS=Danio rerio OX=7955 GN=opn1lw2 PE=1 SV=1
contig_7dpi0076863	2.98439	STB1A_DANRE Histone-lysine N-methyltransferase SETDB1-A OS=Danio rerio OX=7955 GN=setdb1a PE=3 SV=1
contig_7dpi0141282	1.51691	ELAV4_DANRE ELAV-like protein 4 OS=Danio rerio OX=7955 GN=elavl4 PE=1 SV=2
contig_7dpi0035859	2.575	SF3B3_DANRE Splicing factor 3B subunit 3 OS=Danio rerio OX=7955 GN=sf3b3 PE=2 SV=1
contig_7dpi0001820	1.70009e-29	DDX46_DANRE Probable ATP-dependent RNA helicase DDX46 OS=Danio rerio OX=7955 GN=ddx46 PE=2 SV=1
contig_7dpi0011701	2.6102	BICL2_DANRE BICD family-like cargo adapter 2 OS=Danio rerio OX=7955 GN=bicdl2 PE=2 SV=1
contig_7dpi0010457	3.53445e-26	ANR52_DANRE Serine/threonine-protein phosphatase 6 regulatory ankyrin repeat subunit C OS=Danio rerio OX=7955 GN=ankrd52 PE=2 SV=1
contig_7dpi0018904	0.46267	ITLN_ONCMY Intelectin OS=Oncorhynchus mykiss OX=8022 GN=itln PE=1 SV=1
contig_7dpi0047520	1.82554	PIS4A_DANRE E3 SUMO-protein ligase PIAS4-A OS=Danio rerio OX=7955 GN=pias4a PE=2 SV=2
contig_7dpi0046992	1.69222	ESR22_CARAU Estrogen receptor beta-2 OS=Carassius auratus OX=7957 GN=esr2b PE=2 SV=1
contig_7dpi0009984	0.203895	MELT_DANRE Ventricular zone-expressed PH domain-containing protein OS=Danio rerio OX=7955 GN=veph PE=2 SV=1
contig_7dpi0021392	9.39785e-46	RA21A_DANRE Double-strand-break repair protein rad21 homolog A OS=Danio rerio OX=7955 GN=rad21a PE=1 SV=1
contig_7dpi0016619	1.29565	AACS_DANRE Acetoacetyl-CoA synthetase OS=Danio rerio OX=7955 GN=aacs PE=2 SV=1
contig_7dpi0027122	0.873846	CXAR_DANRE Coxsackievirus and adenovirus receptor homolog OS=Danio rerio OX=7955 GN=cxadr PE=2 SV=1
contig_7dpi0030981	9.20355e-48	DDX46_DANRE Probable ATP-dependent RNA helicase DDX46 OS=Danio rerio OX=7955 GN=ddx46 PE=2 SV=1
contig_7dpi0000357	0.116729	CP135_DANRE Centrosomal protein of 135 kDa OS=Danio rerio OX=7955 GN=cep135 PE=3 SV=2
contig_7dpi0012276		not available
contig_7dpi0008150	3.39134	HBAP1_DANRE HSPB1-associated protein 1 homolog OS=Danio rerio OX=7955 GN=hspbap1 PE=2 SV=2
contig_7dpi0027426	2.55873	MRP2A_DANRE Melanocortin-2 receptor accessory protein 2A OS=Danio rerio OX=7955 GN=mrap2a PE=1 SV=1
contig_7dpi0018537	0.346132	PTPRF_DANRE Receptor-type tyrosine-protein phosphatase F OS=Danio rerio OX=7955 GN=ptprf PE=2 SV=1
contig_7dpi0053115	0.266447	M10B1_DANRE Putative helicase mov-10-B.1 OS=Danio rerio OX=7955 GN=mov10b.1 PE=2 SV=2
contig_7dpi0014449	0.870469	ITLN_ONCMY Intelectin OS=Oncorhynchus mykiss OX=8022 GN=itln PE=1 SV=1
contig_7dpi0004476	6.2439e-09	RXRBA_DANRE Retinoic acid receptor RXR-beta-A OS=Danio rerio OX=7955 GN=rxrba PE=2 SV=1
contig_7dpi0057677	1.91467	EIF3A_DANRE Eukaryotic translation initiation factor 3 subunit A OS=Danio rerio OX=7955 GN=eif3a PE=2 SV=1
contig_7dpi0030540	0.132197	MYNN_DANRE Myoneurin OS=Danio rerio OX=7955 GN=mynn PE=2 SV=1
contig_7dpi0029419	0.149329	PLXA3_DANRE Plexin A3 OS=Danio rerio OX=7955 GN=plxna3 PE=2 SV=2
contig_7dpi0051459	3.91269e-06	SH3R1_DANRE E3 ubiquitin-protein ligase SH3RF1 OS=Danio rerio OX=7955 GN=sh3rf1 PE=2 SV=2
contig_7dpi0078309	1.05659	JAK1_DANRE Tyrosine-protein kinase JAK1 OS=Danio rerio OX=7955 GN=jak1 PE=1 SV=1
contig_7dpi0018808	1.82194	PTPRC_CYPCA Receptor-type tyrosine-protein phosphatase C OS=Cyprinus carpio OX=7962 GN=ptprc PE=2 SV=1
contig_7dpi0003922	0.219452	TERB1_DANRE Telomere repeats-binding bouquet formation protein 1 OS=Danio rerio OX=7955 GN=ccdc79 PE=3 SV=2
contig_7dpi0109305	4.3056	MYLIB_DANRE E3 ubiquitin-protein ligase MYLIP-B OS=Danio rerio OX=7955 GN=mylipb PE=2 SV=1
contig_7dpi0009190	8.40247e-119	PRP39_DANRE Pre-mRNA-processing factor 39 OS=Danio rerio OX=7955 GN=prpf39 PE=2 SV=2
contig_7dpi0100139	1.24429	NAGS_DANRE N-acetylglutamate synthase, mitochondrial OS=Danio rerio OX=7955 GN=nags PE=1 SV=1
contig_7dpi0113648	8.80087	SAC1A_DANRE Phosphatidylinositide phosphatase SAC1-A OS=Danio rerio OX=7955 GN=sacm1la PE=2 SV=2
contig_7dpi0001052	3.14078	T178B_DANRE Transmembrane protein 178B OS=Danio rerio OX=7955 GN=tmem178b PE=2 SV=1
contig_7dpi0043635	3.40365e-05	MCA3A_DANRE Protein-methionine sulfoxide oxidase mical3a OS=Danio rerio OX=7955 GN=mical3a PE=2 SV=2
contig_7dpi0053445	3.71856	SIK3_DANRE Serine/threonine-protein kinase SIK3 homolog OS=Danio rerio OX=7955 GN=zgc:66101 PE=2 SV=1
contig_7dpi0125173	1.51573	GPT3L_DANRE Glycerol-3-phosphate acyltransferase 3-like OS=Danio rerio OX=7955 GN=agpat9l PE=3 SV=1
contig_7dpi0000821	7.50901e-14	GULP1_DANRE PTB domain-containing engulfment adapter protein 1 OS=Danio rerio OX=7955 GN=gulp1 PE=2 SV=1
contig_7dpi0043431	0.0109567	L1CAM_TAKRU Neural cell adhesion molecule L1 OS=Takifugu rubripes OX=31033 GN=l1cam PE=3 SV=1
contig_7dpi0024873	8.86952	S49A3_DANRE Solute carrier family 49 member A3 OS=Danio rerio OX=7955 GN=slc49a3 PE=2 SV=1
contig_7dpi0021381	0	PTPRF_DANRE Receptor-type tyrosine-protein phosphatase F OS=Danio rerio OX=7955 GN=ptprf PE=2 SV=1
contig_7dpi0012685	0.798019	PELO_DANRE Protein pelota homolog OS=Danio rerio OX=7955 GN=pelo PE=2 SV=1
contig_7dpi0011828	6.73852	AXIN1_DANRE Axin-1 OS=Danio rerio OX=7955 GN=axin1 PE=1 SV=2
contig_7dpi0026039	0.346959	ENDOU_PAROL Poly(U)-specific endoribonuclease OS=Paralichthys olivaceus OX=8255 GN=endou PE=2 SV=1
contig_7dpi0070362	4.509	RFX2_DANRE DNA-binding protein RFX2 OS=Danio rerio OX=7955 GN=rfx2 PE=2 SV=1
contig_7dpi0102114	1.46495	HXABB_TAKRU Homeobox protein Hox-A11b OS=Takifugu rubripes OX=31033 GN=hoxa11b PE=3 SV=1
contig_7dpi0200159	0.372298	TSP4B_DANRE Thrombospondin-4-B OS=Danio rerio OX=7955 GN=thbs4b PE=2 SV=1
contig_7dpi0020205	2.84036e-06	TTC33_DANRE Tetratricopeptide repeat protein 33 OS=Danio rerio OX=7955 GN=ttc33 PE=2 SV=1
contig_7dpi0018384	1.93843	GMPPB_DANRE Mannose-1-phosphate guanyltransferase beta OS=Danio rerio OX=7955 GN=gmppb PE=2 SV=1
contig_7dpi0103459	1.35897	PDS5A_DANRE Sister chromatid cohesion protein PDS5 homolog A OS=Danio rerio OX=7955 GN=pds5a PE=2 SV=1
contig_7dpi0024754	1.98667	SC4AB_DANRE Sodium channel protein type 4 subunit alpha B OS=Danio rerio OX=7955 GN=scn4ab PE=2 SV=1
contig_7dpi0001536	5.1744	PKHH1_DANRE Pleckstrin homology domain-containing family H member 1 OS=Danio rerio OX=7955 GN=plekhh1 PE=2 SV=1
contig_7dpi0113819	1.27039	P53_ONCMY Cellular tumor antigen p53 OS=Oncorhynchus mykiss OX=8022 GN=tp53 PE=2 SV=1
contig_7dpi0055342	0.669744	SOML_SOLSE Somatolactin OS=Solea senegalensis OX=28829 PE=2 SV=1
contig_7dpi0032574	0.0370692	TYRO3_DANRE Tyrosine-protein kinase receptor TYRO3 OS=Danio rerio OX=7955 GN=tyro3 PE=2 SV=1
contig_7dpi0072505	1.35706	TRIPC_DANRE E3 ubiquitin-protein ligase TRIP12 OS=Danio rerio OX=7955 GN=trip12 PE=3 SV=1
contig_7dpi0027190	0.163206	HD_TAKRU Huntingtin OS=Takifugu rubripes OX=31033 GN=htt PE=3 SV=1
contig_7dpi0021807	3.46267e-05	STXA_SYNVE Neoverrucotoxin subunit alpha OS=Synanceia verrucosa OX=51996 PE=1 SV=1
contig_7dpi0181323	0.0458443	GATB_DANRE Glutamyl-tRNA(Gln) amidotransferase subunit B, mitochondrial OS=Danio rerio OX=7955 GN=gatb PE=3 SV=2
contig_7dpi0065208	1.06728	VGFR3_DANRE Vascular endothelial growth factor receptor 3 OS=Danio rerio OX=7955 GN=flt4 PE=2 SV=1
contig_7dpi0039729	1.52251	NCLDB_DANRE Neurocalcin-delta B OS=Danio rerio OX=7955 GN=ncaldb PE=2 SV=1
contig_7dpi0114163	2.81596	NIPLA_DANRE Nipped-B-like protein A OS=Danio rerio OX=7955 GN=nipbla PE=2 SV=1
contig_7dpi0096249	8.1573	CHD1L_DANRE Chromodomain-helicase-DNA-binding protein 1-like OS=Danio rerio OX=7955 GN=chd1l PE=2 SV=1
contig_7dpi0006569	0.617154	MK08_DANRE Mitogen-activated protein kinase 8 OS=Danio rerio OX=7955 GN=mapk8 PE=2 SV=1
contig_7dpi0040520	0.676914	NR1AA_DANRE Neurexin-1a OS=Danio rerio OX=7955 GN=nrxn1a PE=2 SV=1
contig_7dpi0047446	0.0250642	CSN2_DANRE COP9 signalosome complex subunit 2 OS=Danio rerio OX=7955 GN=cops2 PE=2 SV=1
contig_7dpi0064278	1.51641	CTNA2_DANRE Catenin alpha-2 OS=Danio rerio OX=7955 GN=Ctnna2 PE=3 SV=1
contig_7dpi0007952	1.5781	KBTB8_DANRE Kelch repeat and BTB domain-containing protein 8 OS=Danio rerio OX=7955 GN=kbtbd8 PE=2 SV=1
contig_7dpi0003707	1.54957	STXB_SYNHO Stonustoxin subunit beta OS=Synanceia horrida OX=13279 PE=1 SV=3
contig_7dpi0031943	2.05946e-10	STXB_SYNHO Stonustoxin subunit beta OS=Synanceia horrida OX=13279 PE=1 SV=3
contig_7dpi0066993	1.17967	CCNF_DANRE Cyclin-F OS=Danio rerio OX=7955 GN=ccnf PE=2 SV=1
contig_7dpi0023990	5.34724e-16	CTL2_SALSA Choline transporter-like protein 2 OS=Salmo salar OX=8030 GN=slc44a2 PE=2 SV=1
contig_7dpi0023053	2.14662	STB5L_DANRE Syntaxin-binding protein 5-like OS=Danio rerio OX=7955 GN=stxbp5l PE=3 SV=1
contig_7dpi0022119	3.84539	PIWL2_ONCMY Piwi-like protein 2 OS=Oncorhynchus mykiss OX=8022 GN=piwil2 PE=2 SV=1
contig_7dpi0042162	0.955988	TIM14_DANRE Mitochondrial import inner membrane translocase subunit TIM14 OS=Danio rerio OX=7955 GN=dnajc19 PE=3 SV=1
contig_7dpi0007633	0.735405	HELT_DANRE Hairy and enhancer of split-related protein helt OS=Danio rerio OX=7955 GN=helt PE=2 SV=1
contig_7dpi0026397	5.41582e-17	NLRC5_ICTPU Protein NLRC5 OS=Ictalurus punctatus OX=7998 GN=nlrc5 PE=2 SV=1
contig_7dpi0020676	2.67412e-05	CHFR_DANRE E3 ubiquitin-protein ligase CHFR OS=Danio rerio OX=7955 GN=chfr PE=2 SV=1
contig_7dpi0026858	0.964248	PP1RB_DANRE E3 ubiquitin-protein ligase PPP1R11 OS=Danio rerio OX=7955 GN=ppp1r11 PE=1 SV=1
contig_7dpi0053840	8.46571	PIHD2_DANRE PIH1 domain-containing protein 2 OS=Danio rerio OX=7955 GN=pih1d2 PE=2 SV=1
contig_7dpi0057011	2.09551	LRWD1_DANRE Leucine-rich repeat and WD repeat-containing protein 1 OS=Danio rerio OX=7955 GN=lrwd1 PE=1 SV=1
contig_7dpi0011616	0.0476381	PAX2A_DANRE Paired box protein Pax-2a OS=Danio rerio OX=7955 GN=pax2a PE=2 SV=2
contig_7dpi0021195	0.000436687	LAMP5_DANRE Lysosome-associated membrane glycoprotein 5 OS=Danio rerio OX=7955 GN=lamp5 PE=2 SV=1
contig_7dpi0044020		not available
contig_7dpi0075805	0.168327	FOS_TAKRU Proto-oncogene c-Fos OS=Takifugu rubripes OX=31033 GN=fos PE=3 SV=1
contig_7dpi0029078	0	SAMH1_DANRE Deoxynucleoside triphosphate triphosphohydrolase SAMHD1 OS=Danio rerio OX=7955 GN=samhd1 PE=2 SV=2
contig_7dpi0070284	0.0167314	E2F8_DANRE Transcription factor E2F8 OS=Danio rerio OX=7955 GN=e2f8 PE=3 SV=1
contig_7dpi0023172	5.81866	SIAT2_DANRE Beta-galactoside alpha-2,6-sialyltransferase 2 OS=Danio rerio OX=7955 GN=st6gal2 PE=2 SV=1
contig_7dpi0029908	3.22794	STAU2_DANRE Double-stranded RNA-binding protein Staufen homolog 2 OS=Danio rerio OX=7955 GN=stau2 PE=2 SV=2
contig_7dpi0096308	1.17158	PCX4_DANRE Pecanex-like protein 4 OS=Danio rerio OX=7955 GN=pcnx4 PE=2 SV=1
contig_7dpi0017272	8.46711	SC4AA_TAKRU Sodium channel protein type 4 subunit alpha A OS=Takifugu rubripes OX=31033 GN=scn4aa PE=3 SV=1
contig_7dpi0037271	0	SRBP2_DANRE Sterol regulatory element-binding protein 2 OS=Danio rerio OX=7955 GN=srebf2 PE=2 SV=1
contig_7dpi0053792	7.49452e-19	LENG8_DANRE Leukocyte receptor cluster member 8 homolog OS=Danio rerio OX=7955 GN=leng8 PE=2 SV=1
contig_7dpi0088119	0.259186	KLH36_DANRE Kelch-like protein 36 OS=Danio rerio OX=7955 GN=klhl36 PE=2 SV=1
contig_7dpi0008261		not available
contig_7dpi0007273	2.27028e-24	ETV4_DANRE ETS translocation variant 4 OS=Danio rerio OX=7955 GN=etv4 PE=1 SV=2
contig_7dpi0001113	0.0175949	DYHC_ONCMY Dynein heavy chain (Fragment) OS=Oncorhynchus mykiss OX=8022 PE=2 SV=1
contig_7dpi0047492	2.23756	AGO3_DANRE Protein argonaute-3 OS=Danio rerio OX=7955 GN=ago3 PE=3 SV=1
contig_7dpi0005424	0.533524	MNAR1_DANRE Major intrinsically disordered Notch2-binding receptor 1 OS=Danio rerio OX=7955 GN=minar1 PE=2 SV=3
contig_7dpi0007570	1.75855	MYO1C_DANRE Unconventional myosin-Ic OS=Danio rerio OX=7955 GN=myo1c PE=3 SV=1
contig_7dpi0027362	0.084568	ACSF2_DANRE Medium-chain acyl-CoA ligase ACSF2, mitochondrial OS=Danio rerio OX=7955 GN=acsf2 PE=2 SV=1
contig_7dpi0168821	0.806623	PLXA4_DANRE Plexin-A4 OS=Danio rerio OX=7955 GN=plxna4 PE=2 SV=1
contig_7dpi0064528	0.166301	HV03_CARAU Ig heavy chain V region 3 OS=Carassius auratus OX=7957 PE=4 SV=1
contig_7dpi0225452	0.3238	CNDH2_DANRE Condensin-2 complex subunit H2 OS=Danio rerio OX=7955 GN=ncaph2 PE=2 SV=1
contig_7dpi0027751	0.927934	KCNA2_ONCMY Potassium voltage-gated channel subfamily A member 2 OS=Oncorhynchus mykiss OX=8022 GN=kcna2 PE=2 SV=1
contig_7dpi0006036	9.1656	L3BPB_DANRE Galectin-3-binding protein B OS=Danio rerio OX=7955 GN=lgals3bpb PE=2 SV=1
contig_7dpi0015656	1.94878e-13	DDX46_DANRE Probable ATP-dependent RNA helicase DDX46 OS=Danio rerio OX=7955 GN=ddx46 PE=2 SV=1
contig_7dpi0017929	0.832355	NBN_DANRE Nibrin OS=Danio rerio OX=7955 GN=nbn PE=2 SV=2
contig_7dpi0037686	0.0944583	AGRV1_DANRE Adhesion G-protein coupled receptor V1 OS=Danio rerio OX=7955 GN=adgrv1 PE=2 SV=1
contig_7dpi0026270	1.85733	HEY2_DANRE Hairy/enhancer-of-split related with YRPW motif protein 2 OS=Danio rerio OX=7955 GN=hey2 PE=2 SV=2
contig_7dpi0021428	0.939634	UB2V2_DANRE Ubiquitin-conjugating enzyme E2 variant 2 OS=Danio rerio OX=7955 GN=ube2v2 PE=2 SV=1
contig_7dpi0015499	1.49828	KAZRA_DANRE Kazrin-A OS=Danio rerio OX=7955 GN=kazna PE=3 SV=1
contig_7dpi0108203		not available
contig_7dpi0036037	0.00688381	SLX4I_DANRE Protein SLX4IP OS=Danio rerio OX=7955 GN=slx4ip PE=2 SV=1
contig_7dpi0029071	0.39058	LFN1L_DANRE Leucine-rich repeat and fibronectin type III domain-containing protein 1-like protein OS=Danio rerio OX=7955 GN=lrfn1l PE=2 SV=1
contig_7dpi0010827	0.0269097	CRA1A_DANRE Collagen alpha-1(XXVII) chain A OS=Danio rerio OX=7955 GN=col27a1a PE=2 SV=1
contig_7dpi0017051	4.76243	PUS7L_DANRE Pseudouridylate synthase 7 homolog-like protein OS=Danio rerio OX=7955 GN=pus7l PE=2 SV=1
contig_7dpi0049104	8.37849e-09	SEM4E_DANRE Semaphorin-4E OS=Danio rerio OX=7955 GN=sema4e PE=2 SV=1
contig_7dpi0007763	0.515503	SAS6_DANRE Spindle assembly abnormal protein 6 homolog OS=Danio rerio OX=7955 GN=sass6 PE=1 SV=1
contig_7dpi0017163	1.15268e-29	SEM4E_DANRE Semaphorin-4E OS=Danio rerio OX=7955 GN=sema4e PE=2 SV=1
contig_7dpi0033809	7.34416e-07	NLRC5_ICTPU Protein NLRC5 OS=Ictalurus punctatus OX=7998 GN=nlrc5 PE=2 SV=1
contig_7dpi0104355	8.74528	NDUF3_DANRE NADH dehydrogenase [ubiquinone] 1 alpha subcomplex assembly factor 3 OS=Danio rerio OX=7955 GN=ndufaf3 PE=2 SV=1
contig_7dpi0024759	1.37779	NUP35_DANRE Nucleoporin NUP35 OS=Danio rerio OX=7955 GN=nup35 PE=1 SV=1
contig_7dpi0030939	6.37139	HXC6A_DANRE Homeobox protein Hox-C6a OS=Danio rerio OX=7955 GN=hoxc6a PE=2 SV=2
contig_7dpi0042552	0.00927649	CD166_CARAU CD166 antigen homolog OS=Carassius auratus OX=7957 GN=alcam PE=1 SV=2
contig_7dpi0046482	2.52159	AL9A1_GADMC 4-trimethylaminobutyraldehyde dehydrogenase OS=Gadus morhua subsp. callarias OX=8053 GN=aldh9A1 PE=1 SV=1
contig_7dpi0035393	7.55283e-158	SEPT3_DANRE Neuronal-specific septin-3 OS=Danio rerio OX=7955 GN=septin3 PE=2 SV=1
contig_7dpi0012507	0	KPCB_DANRE Protein kinase C beta type OS=Danio rerio OX=7955 GN=prkcbb PE=2 SV=1
contig_7dpi0030256	8.39706	DI2BA_DANRE Disco-interacting protein 2 homolog B-A OS=Danio rerio OX=7955 GN=dip2ba PE=2 SV=1
contig_7dpi0047466	2.66151	RIPR2_DANRE Rho family-interacting cell polarization regulator 2 OS=Danio rerio OX=7955 GN=ripor2 PE=2 SV=1
contig_7dpi0047068	0.03788	TRI33_DANRE E3 ubiquitin-protein ligase TRIM33 OS=Danio rerio OX=7955 GN=trim33 PE=2 SV=1
contig_7dpi0078003	0.339596	TM38B_DANRE Trimeric intracellular cation channel type B OS=Danio rerio OX=7955 GN=tmem38b PE=2 SV=1
contig_7dpi0002230	5.84825	DEFI6_DANRE Differentially expressed in FDCP 6 homolog OS=Danio rerio OX=7955 GN=def6 PE=2 SV=1
contig_7dpi0030633	7.76476e-06	CD166_CARAU CD166 antigen homolog OS=Carassius auratus OX=7957 GN=alcam PE=1 SV=2
contig_7dpi0029236	1.31565	ZNT9_DANRE Zinc transporter 9 OS=Danio rerio OX=7955 GN=slc30a9 PE=2 SV=1
contig_7dpi0062009	0.0917557	HME1A_DANRE Homeobox protein engrailed-1a OS=Danio rerio OX=7955 GN=eng1a PE=2 SV=1
contig_7dpi0048509	0.42057	CYTSA_TETNG Cytospin-A OS=Tetraodon nigroviridis OX=99883 GN=specc1l PE=2 SV=1
contig_7dpi0034563	2.49744	LAMB4_DANRE Laminin subunit beta-4 OS=Danio rerio OX=7955 GN=lamb4 PE=2 SV=1
contig_7dpi0013329	0.00416548	FGFR4_DANRE Fibroblast growth factor receptor 4 OS=Danio rerio OX=7955 GN=fgfr4 PE=1 SV=1
contig_7dpi0015058		not available
contig_7dpi0077074	1.66127	SAC2_DANRE Phosphatidylinositide phosphatase SAC2 OS=Danio rerio OX=7955 GN=inpp5f PE=3 SV=1
contig_7dpi0058909	5.79238e-110	R213A_DANRE E3 ubiquitin-protein ligase rnf213-alpha OS=Danio rerio OX=7955 GN=rnf213a PE=3 SV=1
contig_7dpi0000035	0.47048	QTRT2_DANRE Queuine tRNA-ribosyltransferase accessory subunit 2 OS=Danio rerio OX=7955 GN=qtrt2 PE=2 SV=2
contig_7dpi0019425	5.95858	LAMB4_DANRE Laminin subunit beta-4 OS=Danio rerio OX=7955 GN=lamb4 PE=2 SV=1
contig_7dpi0013046	0.425288	UQCC3_DANRE Ubiquinol-cytochrome-c reductase complex assembly factor 3 OS=Danio rerio OX=7955 GN=uqcc3 PE=3 SV=2
contig_7dpi0061992	4.46327	NU1M_FORLA NADH-ubiquinone oxidoreductase chain 1 OS=Formosania lacustris OX=7980 GN=MT-ND1 PE=3 SV=1
contig_7dpi0018617	1.09367	LDHA_FUNHE L-lactate dehydrogenase A chain OS=Fundulus heteroclitus OX=8078 GN=ldha PE=2 SV=3
contig_7dpi0066949	1.65066	K1109_DANRE Transmembrane protein KIAA1109 homolog OS=Danio rerio OX=7955 GN=si:ch211-233a24.2 PE=3 SV=1
contig_7dpi0001221	1.56574	TMM71_DANRE Transmembrane protein 71 OS=Danio rerio OX=7955 GN=tmem71 PE=3 SV=1
contig_7dpi0002594	1.54845e-07	PKHH1_DANRE Pleckstrin homology domain-containing family H member 1 OS=Danio rerio OX=7955 GN=plekhh1 PE=2 SV=1
contig_7dpi0008831	0.0123968	DDX46_DANRE Probable ATP-dependent RNA helicase DDX46 OS=Danio rerio OX=7955 GN=ddx46 PE=2 SV=1
contig_7dpi0027840	2.49642	KEP1B_DANRE Kelch-like ECH-associated protein 1B OS=Danio rerio OX=7955 GN=keap1b PE=1 SV=1
contig_7dpi0061018	0.788345	LTV1_DANRE Protein LTV1 homolog OS=Danio rerio OX=7955 GN=ltv1 PE=2 SV=1
contig_7dpi0026793	0.871756	BBS2_DANRE Bardet-Biedl syndrome 2 protein homolog OS=Danio rerio OX=7955 GN=bbs2 PE=2 SV=1
contig_7dpi0018895	6.84587e-15	BRD9_DANRE Bromodomain-containing protein 9 OS=Danio rerio OX=7955 GN=brd9 PE=2 SV=1
contig_7dpi0008625	0.000179963	ALDOA_SALSA Fructose-bisphosphate aldolase A OS=Salmo salar OX=8030 PE=1 SV=1
contig_7dpi0042495	6.30587e-08	SEM4E_DANRE Semaphorin-4E OS=Danio rerio OX=7955 GN=sema4e PE=2 SV=1
contig_7dpi0005032	2.9262e-44	MYSS_CYPCA Myosin heavy chain, fast skeletal muscle OS=Cyprinus carpio OX=7962 PE=2 SV=2
contig_7dpi0037373	7.85652	TRFE1_SALSA Serotransferrin-1 OS=Salmo salar OX=8030 GN=tf1 PE=1 SV=1
contig_7dpi0046697	0.710227	CYGB1_DANRE Cytoglobin-1 OS=Danio rerio OX=7955 GN=cygb1 PE=2 SV=2
contig_7dpi0003952	1.4527	VA0D1_DANRE V-type proton ATPase subunit d 1 OS=Danio rerio OX=7955 GN=atp6v0d1 PE=1 SV=1
contig_7dpi0028014	2.03225	GPN3_DANRE GPN-loop GTPase 3 OS=Danio rerio OX=7955 GN=gpn3 PE=2 SV=2
contig_7dpi0041589	4.15907	CAM1B_DANRE Calmodulin-regulated spectrin-associated protein 1-B OS=Danio rerio OX=7955 GN=camsap1b PE=3 SV=1
contig_7dpi0091006	0.0874139	CCD22_DANRE Coiled-coil domain-containing protein 22 OS=Danio rerio OX=7955 GN=ccdc22 PE=2 SV=1
contig_7dpi0000347	1.01161	GRB1L_DANRE GREB1-like protein OS=Danio rerio OX=7955 GN=greb1l PE=2 SV=2
contig_7dpi0036723	2.16048	CYC_CYPCA Cytochrome c iso-1/iso-2 OS=Cyprinus carpio OX=7962 GN=cyc PE=1 SV=3
contig_7dpi0023778	4.25946	UBP20_DANRE Ubiquitin carboxyl-terminal hydrolase 20 OS=Danio rerio OX=7955 GN=usp20 PE=3 SV=1
contig_7dpi0025184	1.96075	VIT1_FUNHE Vitellogenin-1 OS=Fundulus heteroclitus OX=8078 GN=vtg1 PE=1 SV=2
contig_7dpi0391921	1.19635	NIPLA_DANRE Nipped-B-like protein A OS=Danio rerio OX=7955 GN=nipbla PE=2 SV=1
contig_7dpi0207739	2.5828	PTC1_DANRE Protein patched homolog 1 OS=Danio rerio OX=7955 GN=ptch1 PE=2 SV=1
contig_7dpi0064915	0.800745	GLRA1_DANRE Glycine receptor subunit alphaZ1 OS=Danio rerio OX=7955 GN=glra1 PE=1 SV=1
contig_7dpi0067198	3.75813	INS2_BATSP Insulin 2 OS=Batrachoididae sp. OX=8066 GN=ins2 PE=1 SV=1
contig_7dpi0062529	1.53397	YJU2_DANRE Splicing factor YJU2 OS=Danio rerio OX=7955 GN=yju2 PE=1 SV=1
contig_7dpi0022049	1.22839	DMTF1_DANRE Cyclin-D-binding Myb-like transcription factor 1 OS=Danio rerio OX=7955 GN=dmtf1 PE=2 SV=1
contig_7dpi0022576	1.80698	PLST_CARAU Plasticin OS=Carassius auratus OX=7957 PE=2 SV=1
contig_7dpi0038720	0.967103	LGR4_DANRE Leucine-rich repeat-containing G-protein coupled receptor 4 OS=Danio rerio OX=7955 GN=lgr4 PE=2 SV=1
contig_7dpi0009896	3.15691	SMY2B_DANRE N-lysine methyltransferase SMYD2-B OS=Danio rerio OX=7955 GN=smyd2b PE=2 SV=2
contig_7dpi0016458	2.43255	KD5BB_DANRE Lysine-specific demethylase 5B-B OS=Danio rerio OX=7955 GN=kdm5bb PE=2 SV=2
contig_7dpi0036535	1.51972	TYRP1_CARAU 5,6-dihydroxyindole-2-carboxylic acid oxidase OS=Carassius auratus OX=7957 GN=tyrp1 PE=2 SV=1
contig_7dpi0003842	0	RIR1_DANRE Ribonucleoside-diphosphate reductase large subunit OS=Danio rerio OX=7955 GN=rrm1 PE=2 SV=1
contig_7dpi0019329	1.13947	MYCB_DANRE Transcriptional regulator Myc-B OS=Danio rerio OX=7955 GN=mycb PE=2 SV=1
contig_7dpi0112945	1.0647	KAZRA_DANRE Kazrin-A OS=Danio rerio OX=7955 GN=kazna PE=3 SV=1
contig_7dpi0100057	0.00848664	NLRC5_ICTPU Protein NLRC5 OS=Ictalurus punctatus OX=7998 GN=nlrc5 PE=2 SV=1
contig_7dpi0096358	1.01323	PGFRA_DANRE Platelet-derived growth factor receptor alpha OS=Danio rerio OX=7955 GN=pdgfra PE=2 SV=1
contig_7dpi0020206	2.91927e-06	TTC33_DANRE Tetratricopeptide repeat protein 33 OS=Danio rerio OX=7955 GN=ttc33 PE=2 SV=1
contig_7dpi0037269	0.212984	FBXL5_SALSA F-box/LRR-repeat protein 5 OS=Salmo salar OX=8030 GN=fbxl5 PE=2 SV=1
contig_7dpi0095038	0.0050821	ERAL1_SALSA GTPase Era, mitochondrial OS=Salmo salar OX=8030 GN=eral1 PE=2 SV=1
contig_7dpi0036970	0.39622	RD10A_DANRE Retinol dehydrogenase 10-A OS=Danio rerio OX=7955 GN=rdh10a PE=2 SV=1
contig_7dpi0077831	0.625673	AT2A1_MAKNI Sarcoplasmic/endoplasmic reticulum calcium ATPase 1 OS=Makaira nigricans OX=13604 GN=atp2a1 PE=2 SV=2
contig_7dpi0012348	0.00195289	GDAP2_DANRE Ganglioside-induced differentiation-associated protein 2 OS=Danio rerio OX=7955 GN=gdap2 PE=2 SV=1
contig_7dpi0198209	1.4025	SMR8B_DANRE Guanine nucleotide exchange protein smcr8b OS=Danio rerio OX=7955 GN=smcr8b PE=2 SV=1
contig_7dpi0007830	1.55435	GFAP_DANRE Glial fibrillary acidic protein OS=Danio rerio OX=7955 GN=gfap PE=1 SV=2
contig_7dpi0048598	8.40929	CCD22_DANRE Coiled-coil domain-containing protein 22 OS=Danio rerio OX=7955 GN=ccdc22 PE=2 SV=1
contig_7dpi0172931	8.54685	JAK1_DANRE Tyrosine-protein kinase JAK1 OS=Danio rerio OX=7955 GN=jak1 PE=1 SV=1
contig_7dpi0001036	0	NCPR_SALTR NADPH--cytochrome P450 reductase (Fragments) OS=Salmo trutta OX=8032 GN=por PE=1 SV=1
contig_7dpi0102061	0.578786	NELL2_DANRE Protein kinase C-binding protein NELL2 OS=Danio rerio OX=7955 GN=nell2 PE=2 SV=1
contig_7dpi0068703	3.24111e-114	EZH2_DANRE Histone-lysine N-methyltransferase EZH2 OS=Danio rerio OX=7955 GN=ezh2 PE=2 SV=1
contig_7dpi0019212	7.13508	RANB9_DANRE Ran-binding protein 9 OS=Danio rerio OX=7955 GN=ranbp9 PE=2 SV=1
contig_7dpi0023952	1.47503e-99	YIPF5_DANRE Protein YIPF5 OS=Danio rerio OX=7955 GN=yipf5 PE=2 SV=1
contig_7dpi0006738	1.12059	HXB3A_DANRE Homeobox protein Hox-B3a OS=Danio rerio OX=7955 GN=hoxb3a PE=2 SV=3
contig_7dpi0010494	0.836906	ILVBL_DANRE Acetolactate synthase-like protein OS=Danio rerio OX=7955 GN=ilvbl PE=2 SV=1
contig_7dpi0011206	0.545029	FIBP_DANRE Acidic fibroblast growth factor intracellular-binding protein B OS=Danio rerio OX=7955 GN=fibpb PE=1 SV=1
contig_7dpi0047913	4.80707e-05	ANS1B_DANRE Ankyrin repeat and sterile alpha motif domain-containing protein 1B OS=Danio rerio OX=7955 GN=anks1b PE=3 SV=1
contig_7dpi0066990	2.9749e-40	SEM4E_DANRE Semaphorin-4E OS=Danio rerio OX=7955 GN=sema4e PE=2 SV=1
contig_7dpi0006905	0.207922	CP192_CARAU Ovarian aromatase OS=Carassius auratus OX=7957 GN=cyp19a2 PE=2 SV=1
contig_7dpi0030424	0.880787	ARMD3_DANRE Armadillo-like helical domain-containing protein 3 OS=Danio rerio OX=7955 GN=armh3 PE=2 SV=2
contig_7dpi0138972	0.443809	CYTSA_DANRE Cytospin-A OS=Danio rerio OX=7955 GN=specc1la PE=2 SV=2
contig_7dpi0016459	1.48448	PTPRU_DANRE Receptor-type tyrosine-protein phosphatase U OS=Danio rerio OX=7955 GN=ptpru PE=2 SV=1
contig_7dpi0024394	0.918567	R213A_DANRE E3 ubiquitin-protein ligase rnf213-alpha OS=Danio rerio OX=7955 GN=rnf213a PE=3 SV=1
contig_7dpi0008734	8.81115	Z687A_DANRE Zinc finger protein 687a OS=Danio rerio OX=7955 GN=znf687a PE=2 SV=1
contig_7dpi0027974	1.03096	TRH_DANRE Pro-thyrotropin-releasing hormone OS=Danio rerio OX=7955 GN=trh PE=2 SV=1
contig_7dpi0038816	7.96455e-108	WDR26_DANRE WD repeat-containing protein 26 OS=Danio rerio OX=7955 GN=wdr26 PE=1 SV=1
contig_7dpi0047036	1.61367	ARP8_SALSA Actin-related protein 8 OS=Salmo salar OX=8030 GN=actr8 PE=2 SV=1
contig_7dpi0064095	3.3815	GATB_DANRE Glutamyl-tRNA(Gln) amidotransferase subunit B, mitochondrial OS=Danio rerio OX=7955 GN=gatb PE=3 SV=2
contig_7dpi0003180	7.24458e-100	CELF2_DANRE CUGBP Elav-like family member 2 OS=Danio rerio OX=7955 GN=celf2 PE=2 SV=1
contig_7dpi0011097	1.97106	3HAO_DANRE 3-hydroxyanthranilate 3,4-dioxygenase OS=Danio rerio OX=7955 GN=haao PE=2 SV=1
contig_7dpi0069712	1.62428	COG4_DANRE Conserved oligomeric Golgi complex subunit 4 OS=Danio rerio OX=7955 GN=cog4 PE=1 SV=1
contig_7dpi0118253	4.70707	CALRL_PAROL Calcitonin gene-related peptide type 1 receptor OS=Paralichthys olivaceus OX=8255 GN=calcrl PE=2 SV=1
contig_7dpi0069071	9.50801	MTND_DANRE 1,2-dihydroxy-3-keto-5-methylthiopentene dioxygenase OS=Danio rerio OX=7955 GN=adi1 PE=2 SV=2
contig_7dpi0016767	6.06507e-21	ETV4_DANRE ETS translocation variant 4 OS=Danio rerio OX=7955 GN=etv4 PE=1 SV=2
contig_7dpi0059576	1.46821	CE290_DANRE Centrosomal protein of 290 kDa OS=Danio rerio OX=7955 GN=cep290 PE=2 SV=1
contig_7dpi0050676	1.28526	GOGA5_DANRE Golgin subfamily A member 5 OS=Danio rerio OX=7955 GN=golga5 PE=2 SV=1
contig_7dpi0015661	2.73179	NR3AA_DANRE Neurexin-3a OS=Danio rerio OX=7955 GN=nrxn3a PE=2 SV=1
contig_7dpi0012099	2.2355	RX2_DANRE Retinal homeobox protein Rx2 OS=Danio rerio OX=7955 GN=rx2 PE=2 SV=1
contig_7dpi0038194	0.000204304	PLK4_DANRE Serine/threonine-protein kinase PLK4 OS=Danio rerio OX=7955 GN=plk4 PE=2 SV=2
contig_7dpi0096399	2.60846	TAM41_DANRE Phosphatidate cytidylyltransferase, mitochondrial OS=Danio rerio OX=7955 GN=tamm41 PE=2 SV=1
contig_7dpi0002184	8.83777e-24	T106B_DANRE Transmembrane protein 106B OS=Danio rerio OX=7955 GN=tmem106b PE=3 SV=1
contig_7dpi0061741	2.02675	RGN_DANRE Regucalcin OS=Danio rerio OX=7955 GN=rgn PE=2 SV=1
contig_7dpi0014371	1.95315e-46	ZN12_MICSA Zinc finger protein ZFMSA12A OS=Micropterus salmoides OX=27706 PE=2 SV=1
contig_7dpi0335298	1.80344	REST_DANRE RE1-silencing transcription factor OS=Danio rerio OX=7955 GN=rest PE=2 SV=1
contig_7dpi0071464	1.73033	CCNB1_ANGJA G2/mitotic-specific cyclin-B1 OS=Anguilla japonica OX=7937 GN=ccnb1 PE=2 SV=1
contig_7dpi0043659	2.52291	TM258_DANRE Transmembrane protein 258 OS=Danio rerio OX=7955 GN=tmem258 PE=3 SV=1
contig_7dpi0013909		not available
contig_7dpi0018221	0.216249	LEG1A_DANRE Protein leg1a OS=Danio rerio OX=7955 GN=leg1a PE=1 SV=1
contig_7dpi0113813	7.78778	DRC2_DANRE Dynein regulatory complex subunit 2 OS=Danio rerio OX=7955 GN=ccdc65 PE=2 SV=2
contig_7dpi0025836	2.26067	CBR4_DANRE Carbonyl reductase family member 4 OS=Danio rerio OX=7955 GN=cbr4 PE=2 SV=1
contig_7dpi0062569	0.95714	HDAC3_DANRE Histone deacetylase 3 OS=Danio rerio OX=7955 GN=hdac3 PE=2 SV=1
contig_7dpi0019389	1.49078e-55	A4_TAKRU Amyloid-beta A4 protein OS=Takifugu rubripes OX=31033 GN=app PE=3 SV=1
contig_7dpi0046944	0.0711852	R213B_DANRE E3 ubiquitin-protein ligase rnf213-beta OS=Danio rerio OX=7955 GN=rnf213b PE=3 SV=1
contig_7dpi0063400	0.995089	VIME_ONCMY Vimentin OS=Oncorhynchus mykiss OX=8022 GN=vim PE=2 SV=1
contig_7dpi0038777	0.00125111	SMC5_TAKRU Structural maintenance of chromosomes protein 5 OS=Takifugu rubripes OX=31033 GN=smc5 PE=2 SV=1
contig_7dpi0074842	3.69419	F214A_DANRE Protein FAM214A OS=Danio rerio OX=7955 GN=fam214a PE=2 SV=2
contig_7dpi0002568	0.530159	NTM1B_DANRE Alpha N-terminal protein methyltransferase 1B OS=Danio rerio OX=7955 GN=mettl11b PE=3 SV=2
contig_7dpi0001944	6.42073e-19	GP83A_DANRE G-protein coupled receptor 183-A OS=Danio rerio OX=7955 GN=gpr183a PE=2 SV=1
contig_7dpi0024421	0.320485	MYCB2_DANRE E3 ubiquitin-protein ligase MYCBP2 OS=Danio rerio OX=7955 GN=mycbp2 PE=2 SV=1
contig_7dpi0003410	2.55884	TYW3_DANRE tRNA wybutosine-synthesizing protein 3 homolog OS=Danio rerio OX=7955 GN=tyw3 PE=2 SV=1
contig_7dpi0002388	5.72911e-09	LARP7_DANRE La-related protein 7 OS=Danio rerio OX=7955 GN=larp7 PE=2 SV=1
contig_7dpi0054110	0.0320936	UBR3_DANRE E3 ubiquitin-protein ligase ubr3 OS=Danio rerio OX=7955 GN=ubr3 PE=2 SV=2
contig_7dpi0049037	0.00789643	CD166_CARAU CD166 antigen homolog OS=Carassius auratus OX=7957 GN=alcam PE=1 SV=2
contig_7dpi0047757	0.056361	LIG1B_DANRE Leucine-rich repeat and immunoglobulin-like domain-containing nogo receptor-interacting protein 1-B OS=Danio rerio OX=7955 GN=lingo1b PE=1 SV=1
contig_7dpi0044943	0.110801	WDR26_DANRE WD repeat-containing protein 26 OS=Danio rerio OX=7955 GN=wdr26 PE=1 SV=1
contig_7dpi0047523	4.34471	JAG1A_DANRE Protein jagged-1a OS=Danio rerio OX=7955 GN=jag1a PE=2 SV=1
contig_7dpi0009848	2.268	SMU1_DANRE WD40 repeat-containing protein SMU1 OS=Danio rerio OX=7955 GN=smu1 PE=2 SV=1
contig_7dpi0017814	1.07739e-105	TM39A_DANRE Transmembrane protein 39A OS=Danio rerio OX=7955 GN=tmem39a PE=2 SV=1
contig_7dpi0011856	0.218064	C42S2_DANRE CDC42 small effector protein 2 OS=Danio rerio OX=7955 GN=cdc42se2 PE=3 SV=1
contig_7dpi0017846	0.2882	PABPA_DANRE Polyadenylate-binding protein 1A OS=Danio rerio OX=7955 GN=pabpc1a PE=1 SV=1
contig_7dpi0023158	0.0973219	WDR18_DANRE WD repeat-containing protein 18 OS=Danio rerio OX=7955 GN=wdr18 PE=2 SV=1
contig_7dpi0033814	1.74697e-11	HARB1_DANRE Putative nuclease HARBI1 OS=Danio rerio OX=7955 GN=harbi1 PE=2 SV=1
contig_7dpi0124271	0.101479	TRPM2_DANRE Transient receptor potential cation channel subfamily M member 2 OS=Danio rerio OX=7955 GN=trpm2 PE=1 SV=2
contig_7dpi0102540	0.302437	TMEDA_TAKRU Transmembrane emp24 domain-containing protein 10 OS=Takifugu rubripes OX=31033 GN=tmed10 PE=3 SV=1
contig_7dpi0052698	2.30568	NEPRO_DANRE Nucleolus and neural progenitor protein OS=Danio rerio OX=7955 GN=nepro PE=2 SV=1
contig_7dpi0001821	6.24337e-10	DDX46_DANRE Probable ATP-dependent RNA helicase DDX46 OS=Danio rerio OX=7955 GN=ddx46 PE=2 SV=1
contig_7dpi0019211	1.86706	R9BP_DANRE Regulator of G-protein signaling 9-binding protein OS=Danio rerio OX=7955 GN=rgs9bp PE=2 SV=1
contig_7dpi0041607	5.2823	R213A_DANRE E3 ubiquitin-protein ligase rnf213-alpha OS=Danio rerio OX=7955 GN=rnf213a PE=3 SV=1
contig_7dpi0012743	5.95171e-69	COR1C_DANRE Coronin-1C-A OS=Danio rerio OX=7955 GN=coro1ca PE=2 SV=1
contig_7dpi0033882	1.34601	MYG_THUAA Myoglobin OS=Thunnus alalunga OX=8235 GN=mb PE=2 SV=3
contig_7dpi0105496	1.74934e-36	ANR52_DANRE Serine/threonine-protein phosphatase 6 regulatory ankyrin repeat subunit C OS=Danio rerio OX=7955 GN=ankrd52 PE=2 SV=1
contig_7dpi0034276	5.59539	ACH92_ONCMY Neuronal acetylcholine receptor subunit alpha-9-II OS=Oncorhynchus mykiss OX=8022 PE=2 SV=1
contig_7dpi0019541	5.7608	PTCD3_DANRE Pentatricopeptide repeat domain-containing protein 3, mitochondrial OS=Danio rerio OX=7955 GN=ptcd3 PE=2 SV=1
contig_7dpi0021198	1.77107	TEN4_DANRE Teneurin-4 OS=Danio rerio OX=7955 GN=tenm4 PE=2 SV=1
contig_7dpi0004276	4.07307	COBL_DANRE Protein cordon-bleu OS=Danio rerio OX=7955 GN=cobl PE=1 SV=2
contig_7dpi0086462	6.45369	SGMR1_DANRE Sigma non-opioid intracellular receptor 1 OS=Danio rerio OX=7955 GN=sigmar1 PE=2 SV=1
contig_7dpi0062782	1.71422e-80	CELF2_DANRE CUGBP Elav-like family member 2 OS=Danio rerio OX=7955 GN=celf2 PE=2 SV=1
contig_7dpi0052530	0.107926	SMR8A_DANRE Guanine nucleotide exchange protein smcr8a OS=Danio rerio OX=7955 GN=smcr8a PE=3 SV=1
contig_7dpi0072308	2.10761e-180	ARNT_ONCMY Aryl hydrocarbon receptor nuclear translocator OS=Oncorhynchus mykiss OX=8022 GN=arnt PE=1 SV=1
contig_7dpi0044158	0.279678	CHAC2_DANRE Putative glutathione-specific gamma-glutamylcyclotransferase 2 OS=Danio rerio OX=7955 GN=chac2 PE=2 SV=1
contig_7dpi0006087	0.0667491	STB5L_DANRE Syntaxin-binding protein 5-like OS=Danio rerio OX=7955 GN=stxbp5l PE=3 SV=1
contig_7dpi0017240	0.349391	LAMC1_DANRE Laminin subunit gamma-1 OS=Danio rerio OX=7955 GN=lamc1 PE=2 SV=2
contig_7dpi0045439	3.7465	EPB4B_DANRE Ephrin type-B receptor 4b OS=Danio rerio OX=7955 GN=ephb4b PE=2 SV=2
contig_7dpi0017069		not available
contig_7dpi0036861	0	NR2F5_DANRE Nuclear receptor subfamily 2 group F member 5 OS=Danio rerio OX=7955 GN=nr2f5 PE=2 SV=1
contig_7dpi0037411		not available
contig_7dpi0454033	0.337602	KDM7A_DANRE Lysine-specific demethylase 7A OS=Danio rerio OX=7955 GN=kdm7a PE=2 SV=2
contig_7dpi0157761	2.40715	TYRO3_DANRE Tyrosine-protein kinase receptor TYRO3 OS=Danio rerio OX=7955 GN=tyro3 PE=2 SV=1
contig_7dpi0093979	0.326694	TDRD9_DANRE ATP-dependent RNA helicase TDRD9 OS=Danio rerio OX=7955 GN=tdrd9 PE=2 SV=1
contig_7dpi0022575	0.212828	PLST_CARAU Plasticin OS=Carassius auratus OX=7957 PE=2 SV=1
contig_7dpi0026012	1.81964e-18	TSN9_DANRE Tetraspanin-9 OS=Danio rerio OX=7955 GN=tspan9 PE=2 SV=1
contig_7dpi0025336	1.04	SRBP2_DANRE Sterol regulatory element-binding protein 2 OS=Danio rerio OX=7955 GN=srebf2 PE=2 SV=1
contig_7dpi0264054	0.966216	RN19B_DANRE E3 ubiquitin-protein ligase RNF19B OS=Danio rerio OX=7955 GN=rnf19b PE=3 SV=2
contig_7dpi0014615	4.12334	OP1S2_DANRE Opsin-1, short-wave-sensitive 2 OS=Danio rerio OX=7955 GN=opn1sw2 PE=1 SV=1
contig_7dpi0009617	4.52091	CYP51_DANRE Lanosterol 14-alpha demethylase OS=Danio rerio OX=7955 GN=cyp51 PE=1 SV=1
contig_7dpi0049229	2.57386	S2539_DANRE Solute carrier family 25 member 39 OS=Danio rerio OX=7955 GN=slc25a39 PE=2 SV=1
contig_7dpi0003303	8.5668e-78	MGT4B_DANRE Alpha-1,3-mannosyl-glycoprotein 4-beta-N-acetylglucosaminyltransferase B OS=Danio rerio OX=7955 GN=mgat4b PE=2 SV=1
contig_7dpi0048011	0.347995	FNDC5_DANRE Fibronectin type III domain-containing protein 5 OS=Danio rerio OX=7955 GN=fndc5 PE=3 SV=1
contig_7dpi0061237	0.409927	COBL_DANRE Protein cordon-bleu OS=Danio rerio OX=7955 GN=cobl PE=1 SV=2
contig_7dpi0037170	0.132648	SAMH1_DANRE Deoxynucleoside triphosphate triphosphohydrolase SAMHD1 OS=Danio rerio OX=7955 GN=samhd1 PE=2 SV=2
contig_7dpi0087338	2.88413	PLXA3_DANRE Plexin A3 OS=Danio rerio OX=7955 GN=plxna3 PE=2 SV=2
contig_7dpi0016010	4.074	PRP39_DANRE Pre-mRNA-processing factor 39 OS=Danio rerio OX=7955 GN=prpf39 PE=2 SV=2
contig_7dpi0035084	0	CSF11_TAKRU Macrophage colony-stimulating factor 1 receptor 1 OS=Takifugu rubripes OX=31033 GN=csf1r1 PE=3 SV=1
contig_7dpi0015490	3.96105	TRIPC_DANRE E3 ubiquitin-protein ligase TRIP12 OS=Danio rerio OX=7955 GN=trip12 PE=3 SV=1
contig_7dpi0017726	0.00105737	CR3LA_DANRE Cyclic AMP-responsive element-binding protein 3-like protein 3-A OS=Danio rerio OX=7955 GN=creb3l3a PE=2 SV=1
contig_7dpi0068989	1.74947	PTPRC_CYPCA Receptor-type tyrosine-protein phosphatase C OS=Cyprinus carpio OX=7962 GN=ptprc PE=2 SV=1
contig_7dpi0033982	0.000888473	OTOF_DANRE Otoferlin OS=Danio rerio OX=7955 GN=otof PE=3 SV=1
contig_7dpi0079193	0.416944	P53_ORYLA Cellular tumor antigen p53 OS=Oryzias latipes OX=8090 GN=tp53 PE=2 SV=2
contig_7dpi0014573	2.38638e-28	PNRC2_SALSA Proline-rich nuclear receptor coactivator 2 OS=Salmo salar OX=8030 GN=pnrc2 PE=2 SV=1
contig_7dpi0000272	1.40693e-33	FMNL3_DANRE Formin-like protein 3 OS=Danio rerio OX=7955 GN=fmnl3 PE=2 SV=2
contig_7dpi0005253	1.13472	HIF1N_DANRE Hypoxia-inducible factor 1-alpha inhibitor OS=Danio rerio OX=7955 GN=hif1an PE=2 SV=2
contig_7dpi0007749	1.93828	CING_DANRE Cingulin OS=Danio rerio OX=7955 GN=cgn PE=2 SV=1
contig_7dpi0068194	0.593831	MYD88_DANRE Myeloid differentiation primary response protein MyD88 OS=Danio rerio OX=7955 GN=myd88 PE=2 SV=2
contig_7dpi0154306	0.953731	PPR3C_CLABA Protein phosphatase 1 regulatory subunit 3C OS=Clarias batrachus OX=59899 GN=PPP1R3C PE=2 SV=1
contig_7dpi0051259	0.510877	GTHB2_ONCTS Gonadotropin subunit beta-2 OS=Oncorhynchus tshawytscha OX=74940 GN=cgbb PE=2 SV=1
contig_7dpi0040499	0.0827318	GP83A_DANRE G-protein coupled receptor 183-A OS=Danio rerio OX=7955 GN=gpr183a PE=2 SV=1
contig_7dpi0005283	8.11497e-13	SPAG1_DANRE Sperm-associated antigen 1A OS=Danio rerio OX=7955 GN=spag1a PE=2 SV=1
contig_7dpi0042432	2.7504	PLXA4_DANRE Plexin-A4 OS=Danio rerio OX=7955 GN=plxna4 PE=2 SV=1
contig_7dpi0050309	4.24411	HYCCI_DANRE Hyccin OS=Danio rerio OX=7955 GN=fam126a PE=2 SV=1
contig_7dpi0036041	0.882917	SERHL_DANRE Serine hydrolase-like protein OS=Danio rerio OX=7955 GN=serhl PE=2 SV=1
contig_7dpi0039482	3.05131	NAA60_DANRE N-alpha-acetyltransferase 60 OS=Danio rerio OX=7955 GN=naa60 PE=2 SV=1
contig_7dpi0002923	1.39089e-05	TRIO_DANRE Triple functional domain protein OS=Danio rerio OX=7955 GN=trio PE=3 SV=1
contig_7dpi0023027	3.04247	MFRN1_DANRE Mitoferrin-1 OS=Danio rerio OX=7955 GN=slc25a37 PE=1 SV=1
contig_7dpi0180425	2.5513	CK053_DANRE Uncharacterized protein C11orf53 homolog OS=Danio rerio OX=7955 GN=zgc:158412 PE=2 SV=1
contig_7dpi0044579	3.81427	AB17C_DANRE Alpha/beta hydrolase domain-containing protein 17C OS=Danio rerio OX=7955 GN=abhd17c PE=2 SV=1
contig_7dpi0056460	1.56256e-25	MYSS_CYPCA Myosin heavy chain, fast skeletal muscle OS=Cyprinus carpio OX=7962 PE=2 SV=2
contig_7dpi0005057	1.0275e-08	MYD88_TAKRU Myeloid differentiation primary response protein MyD88 OS=Takifugu rubripes OX=31033 GN=myd88 PE=2 SV=1
contig_7dpi0020685	0.464234	WN10A_DANRE Protein Wnt-10a OS=Danio rerio OX=7955 GN=wnt10a PE=1 SV=1
contig_7dpi0122017	0.87821	R213B_DANRE E3 ubiquitin-protein ligase rnf213-beta OS=Danio rerio OX=7955 GN=rnf213b PE=3 SV=1
contig_7dpi0018842	0.0562913	FUCL_ANGAN Fucolectin OS=Anguilla anguilla OX=7936 PE=1 SV=1
contig_7dpi0033283	4.24327	MZT2_DANRE Mitotic-spindle organizing protein 2 OS=Danio rerio OX=7955 GN=mzt2 PE=2 SV=1
contig_7dpi0027036	0	LENG8_DANRE Leukocyte receptor cluster member 8 homolog OS=Danio rerio OX=7955 GN=leng8 PE=2 SV=1
contig_7dpi0042433	0.159833	PLXA4_DANRE Plexin-A4 OS=Danio rerio OX=7955 GN=plxna4 PE=2 SV=1
contig_7dpi0070584	0.163416	TTC17_DANRE Tetratricopeptide repeat protein 17 OS=Danio rerio OX=7955 GN=ttc17 PE=3 SV=1
contig_7dpi0010496	0.0765393	PP4R3_TETNG Serine/threonine-protein phosphatase 4 regulatory subunit 3 OS=Tetraodon nigroviridis OX=99883 GN=smek1 PE=3 SV=1
contig_7dpi0025587		not available
contig_7dpi0002947	5.27922e-21	GP83A_DANRE G-protein coupled receptor 183-A OS=Danio rerio OX=7955 GN=gpr183a PE=2 SV=1
contig_7dpi0038846	0.258353	EPB4A_DANRE Ephrin type-B receptor 4a OS=Danio rerio OX=7955 GN=ephb4a PE=2 SV=3
contig_7dpi0128306	1.25162	SGMR1_DANRE Sigma non-opioid intracellular receptor 1 OS=Danio rerio OX=7955 GN=sigmar1 PE=2 SV=1
contig_7dpi0058955	5.49652	RBP10_DANRE Ran-binding protein 10 OS=Danio rerio OX=7955 GN=ranbp10 PE=3 SV=1
contig_7dpi0113370	3.29731	EDC4_DANRE Enhancer of mRNA-decapping protein 4 OS=Danio rerio OX=7955 GN=edc4 PE=3 SV=1
contig_7dpi0096351	2.58678	MD19A_DANRE Mediator of RNA polymerase II transcription subunit 19-A OS=Danio rerio OX=7955 GN=med19a PE=2 SV=1
contig_7dpi0010746	0.165207	SRC_DANRE Proto-oncogene tyrosine-protein kinase Src OS=Danio rerio OX=7955 GN=src PE=1 SV=2
contig_7dpi0039643	0.452143	SF3B3_DANRE Splicing factor 3B subunit 3 OS=Danio rerio OX=7955 GN=sf3b3 PE=2 SV=1
contig_7dpi0016225		not available
contig_7dpi0047565	0.19087	HD_TAKRU Huntingtin OS=Takifugu rubripes OX=31033 GN=htt PE=3 SV=1
contig_7dpi0012280	1.25558	TRAF6_DANRE TNF receptor-associated factor 6 OS=Danio rerio OX=7955 GN=traf6 PE=1 SV=2
contig_7dpi0011942	1.26789	MED23_DANRE Mediator of RNA polymerase II transcription subunit 23 OS=Danio rerio OX=7955 GN=med23 PE=2 SV=2
contig_7dpi0020045	1.57477e-71	B4GT5_DANRE Beta-1,4-galactosyltransferase 5 OS=Danio rerio OX=7955 GN=b4galt5 PE=2 SV=2
contig_7dpi0013366	1.51391e-06	PLXA3_DANRE Plexin A3 OS=Danio rerio OX=7955 GN=plxna3 PE=2 SV=2
contig_7dpi0072290	5.22071	SF3B3_DANRE Splicing factor 3B subunit 3 OS=Danio rerio OX=7955 GN=sf3b3 PE=2 SV=1
contig_7dpi0143848	0.873771	ISP2_HEMAM Type-2 ice-structuring protein OS=Hemitripterus americanus OX=8094 PE=1 SV=2
contig_7dpi0056795	2.17846	HBA1_COTGO Hemoglobin subunit alpha-1 OS=Cottoperca gobio OX=56716 GN=hba1 PE=1 SV=2
contig_7dpi0016129	3.80402e-56	MYLK3_DANRE Myosin light chain kinase 3 OS=Danio rerio OX=7955 GN=mylk3 PE=2 SV=1
contig_7dpi0026647	1.01507	RCC2_DANRE Protein RCC2 homolog OS=Danio rerio OX=7955 GN=rcc2 PE=2 SV=1
contig_7dpi0040870	0.140421	APOA1_SALSA Apolipoprotein A-I OS=Salmo salar OX=8030 GN=apoa1 PE=2 SV=1
contig_7dpi0118058	0.419918	SH34A_DANRE SH3 domain-binding protein 4-A OS=Danio rerio OX=7955 GN=sh3bp4a PE=2 SV=1
contig_7dpi0036536	4.52614	CYHR1_DANRE Cysteine and histidine-rich protein 1 OS=Danio rerio OX=7955 GN=cyhr1 PE=2 SV=1
contig_7dpi0024879	4.74639	NBAS_DANRE Neuroblastoma-amplified sequence OS=Danio rerio OX=7955 GN=nbas PE=2 SV=1
contig_7dpi0036656	0.437825	CNR1B_TAKRU Cannabinoid receptor type 1B OS=Takifugu rubripes OX=31033 GN=cnr1b PE=3 SV=1
contig_7dpi0059235	1.36856	KIF7_DANRE Kinesin-like protein kif7 OS=Danio rerio OX=7955 GN=kif7 PE=1 SV=1
contig_7dpi0016291	0.473712	RL13A_SALTR 60S ribosomal protein L13a (Fragment) OS=Salmo trutta OX=8032 GN=rpl13a PE=2 SV=1
contig_7dpi0027580	1.31075	SART3_DANRE Squamous cell carcinoma antigen recognized by T-cells 3 OS=Danio rerio OX=7955 GN=sart3 PE=2 SV=1
contig_7dpi0020331		not available
contig_7dpi0007605	3.46357	ACES_ELEEL Acetylcholinesterase OS=Electrophorus electricus OX=8005 GN=ache PE=3 SV=1
contig_7dpi0022101	2.39177e-22	CXR32_DANRE C-X-C chemokine receptor type 3-2 OS=Danio rerio OX=7955 GN=cxcr3.2 PE=2 SV=2
contig_7dpi0048735	1.85871e-25	RHG29_DANRE Rho GTPase-activating protein 29 OS=Danio rerio OX=7955 GN=arhgap29 PE=2 SV=1
contig_7dpi0047978	5.91362	S29A4_DANRE Equilibrative nucleoside transporter 4 OS=Danio rerio OX=7955 GN=slc29a4 PE=2 SV=1
contig_7dpi0002310	1.40234	CRGNA_DANRE Gamma-crystallin N-A OS=Danio rerio OX=7955 GN=crygna PE=2 SV=1
contig_7dpi0071017	0.472401	PRVB3_MERHU Parvalbumin beta 3 (Fragments) OS=Merluccius hubbsi OX=89949 PE=1 SV=1
contig_7dpi0116987	1.12519	PP4R3_TETNG Serine/threonine-protein phosphatase 4 regulatory subunit 3 OS=Tetraodon nigroviridis OX=99883 GN=smek1 PE=3 SV=1
contig_7dpi0069078	0.542958	MZT1_DANRE Mitotic-spindle organizing protein 1 OS=Danio rerio OX=7955 GN=mzt1 PE=3 SV=1
contig_7dpi0026268	0.00363191	HELZ_DANRE Probable helicase with zinc finger domain OS=Danio rerio OX=7955 GN=helz PE=2 SV=1
contig_7dpi0005936	8.8167e-16	CALM_ELEEL Calmodulin OS=Electrophorus electricus OX=8005 GN=calm PE=2 SV=2
contig_7dpi0006962	4.18946e-61	CIP4_DANRE Cdc42-interacting protein 4 homolog OS=Danio rerio OX=7955 GN=trip10 PE=2 SV=1
contig_7dpi0017418	2.02978	PI4KB_DANRE Phosphatidylinositol 4-kinase beta OS=Danio rerio OX=7955 GN=pi4kb PE=2 SV=2
contig_7dpi0001299	0.238138	LR14B_DANRE Leucine-rich repeat-containing protein 14B OS=Danio rerio OX=7955 GN=lrrc14b PE=3 SV=1
contig_7dpi0019992	1.85409e-55	LENG8_DANRE Leukocyte receptor cluster member 8 homolog OS=Danio rerio OX=7955 GN=leng8 PE=2 SV=1
contig_7dpi0012145	0.0206985	SPRE2_DANRE Sprouty-related, EVH1 domain-containing protein 2 OS=Danio rerio OX=7955 GN=spred2 PE=2 SV=1
contig_7dpi0031964	3.44741e-12	NECT3_DANRE Nectin-3-like protein OS=Danio rerio OX=7955 GN=nectin3 PE=2 SV=2
contig_7dpi0050658	1.18827	FOXH1_DANRE Forkhead box protein H1 OS=Danio rerio OX=7955 GN=foxh1 PE=1 SV=1
contig_7dpi0019889	0.225909	AGRA2_DANRE Adhesion G protein-coupled receptor A2 OS=Danio rerio OX=7955 GN=adgra2 PE=1 SV=2
contig_7dpi0166384	7.90868	RSAD2_DANRE Radical S-adenosyl methionine domain-containing protein 2 OS=Danio rerio OX=7955 GN=rsad2 PE=2 SV=1
contig_7dpi0049089	1.92481	ZWILC_DANRE Protein zwilch homolog OS=Danio rerio OX=7955 GN=zwilch PE=2 SV=1
contig_7dpi0041283	3.51451	SKR1B_DANRE SKI family transcriptional corepressor 1 homolog-B OS=Danio rerio OX=7955 GN=skor1b PE=2 SV=1
contig_7dpi0021014	0	PALD_DANRE Paladin OS=Danio rerio OX=7955 GN=pald1 PE=2 SV=1
contig_7dpi0023401	8.53397	KIF7_DANRE Kinesin-like protein kif7 OS=Danio rerio OX=7955 GN=kif7 PE=1 SV=1
contig_7dpi0081959	7.12443e-21	GLYR1_DANRE Putative oxidoreductase GLYR1 OS=Danio rerio OX=7955 GN=glyr1 PE=2 SV=1
contig_7dpi0025182	0.0204572	KRIT1_DANRE Krev interaction trapped protein 1 OS=Danio rerio OX=7955 GN=krit1 PE=1 SV=1
contig_7dpi0122789	1.41071	TMX2B_DANRE Thioredoxin-related transmembrane protein 2-B OS=Danio rerio OX=7955 GN=tmx2b PE=2 SV=1
contig_7dpi0047470	1.59066	DUPD1_DANRE Dual specificity phosphatase DUPD1 OS=Danio rerio OX=7955 GN=dupd1 PE=2 SV=1
contig_7dpi0047961	1.09187	RAG2_DANRE V(D)J recombination-activating protein 2 OS=Danio rerio OX=7955 GN=rag2 PE=1 SV=1
contig_7dpi0011096	0.0768231	RGPS1_DANRE Ras-specific guanine nucleotide-releasing factor RalGPS1 OS=Danio rerio OX=7955 GN=ralgps1 PE=2 SV=1
contig_7dpi0025473	6.20822e-09	UBP20_DANRE Ubiquitin carboxyl-terminal hydrolase 20 OS=Danio rerio OX=7955 GN=usp20 PE=3 SV=1
contig_7dpi0023746	0.417693	GP173_DANRE Probable G-protein coupled receptor 173 OS=Danio rerio OX=7955 GN=gpr173 PE=3 SV=1
contig_7dpi0001455	2.63967e-68	HELZ_DANRE Probable helicase with zinc finger domain OS=Danio rerio OX=7955 GN=helz PE=2 SV=1
contig_7dpi0134515	0.664527	NAT14_DANRE N-acetyltransferase 14 OS=Danio rerio OX=7955 GN=nat14 PE=2 SV=1
contig_7dpi0011308	2.25758e-16	MYSS_CYPCA Myosin heavy chain, fast skeletal muscle OS=Cyprinus carpio OX=7962 PE=2 SV=2
contig_7dpi0005435		not available
contig_7dpi0018962	2.71535	HXCCB_DANRE Homeobox protein Hox-C12b OS=Danio rerio OX=7955 GN=hoxc12b PE=2 SV=1
contig_7dpi0015057		not available
contig_7dpi0135826	1.55507	TEN4_DANRE Teneurin-4 OS=Danio rerio OX=7955 GN=tenm4 PE=2 SV=1
contig_7dpi0058089	0	SYVC_TAKRU Valine--tRNA ligase OS=Takifugu rubripes OX=31033 GN=vars PE=3 SV=1
contig_7dpi0002863	4.7884	NCBP1_SALSA Nuclear cap-binding protein subunit 1 OS=Salmo salar OX=8030 GN=ncbp1 PE=2 SV=1
contig_7dpi0007803	0.467931	KITA_DANRE Mast/stem cell growth factor receptor kita OS=Danio rerio OX=7955 GN=kita PE=2 SV=2
contig_7dpi0076137	0.295697	KLH36_DANRE Kelch-like protein 36 OS=Danio rerio OX=7955 GN=klhl36 PE=2 SV=1
contig_7dpi0022204	2.82931e-08	SRBP2_DANRE Sterol regulatory element-binding protein 2 OS=Danio rerio OX=7955 GN=srebf2 PE=2 SV=1
contig_7dpi0089722	1.57204	MIB1_DANRE E3 ubiquitin-protein ligase mib1 OS=Danio rerio OX=7955 GN=mib1 PE=1 SV=1
contig_7dpi0095836	0.705502	HBB2_DANRE Hemoglobin subunit beta-2 OS=Danio rerio OX=7955 GN=ba2 PE=1 SV=3
contig_7dpi0065269	1.70725	LAMB4_DANRE Laminin subunit beta-4 OS=Danio rerio OX=7955 GN=lamb4 PE=2 SV=1
contig_7dpi0055039	2.8493e-08	SRC_DANRE Proto-oncogene tyrosine-protein kinase Src OS=Danio rerio OX=7955 GN=src PE=1 SV=2
contig_7dpi0023905	2.85756	BAF_DANRE Barrier-to-autointegration factor OS=Danio rerio OX=7955 GN=banf1 PE=1 SV=1
contig_7dpi0044068	2.99882	R213B_DANRE E3 ubiquitin-protein ligase rnf213-beta OS=Danio rerio OX=7955 GN=rnf213b PE=3 SV=1
contig_7dpi0031086	7.85322	WASC5_DANRE WASH complex subunit 5 OS=Danio rerio OX=7955 GN=washc5 PE=2 SV=1
contig_7dpi0074665	1.37873	IL6_PAROL Interleukin-6 OS=Paralichthys olivaceus OX=8255 GN=il6 PE=2 SV=1
contig_7dpi0013674	4.22948e-06	UBP20_DANRE Ubiquitin carboxyl-terminal hydrolase 20 OS=Danio rerio OX=7955 GN=usp20 PE=3 SV=1
contig_7dpi0098227	8.4406e-13	RA21A_DANRE Double-strand-break repair protein rad21 homolog A OS=Danio rerio OX=7955 GN=rad21a PE=1 SV=1
contig_7dpi0054655	1.60905e-07	KPCB_DANRE Protein kinase C beta type OS=Danio rerio OX=7955 GN=prkcbb PE=2 SV=1
contig_7dpi0026735	0.998491	IF43B_SALSA Intraflagellar transport protein 43 homolog B OS=Salmo salar OX=8030 GN=ift43b PE=2 SV=1
contig_7dpi0056230	0.0568536	KTU_DANRE Protein kintoun OS=Danio rerio OX=7955 GN=dnaaf2 PE=2 SV=1
contig_7dpi0022490	1.54353	PCX4_DANRE Pecanex-like protein 4 OS=Danio rerio OX=7955 GN=pcnx4 PE=2 SV=1
contig_7dpi0008875	3.63093	ARNT2_DANRE Aryl hydrocarbon receptor nuclear translocator 2 OS=Danio rerio OX=7955 GN=arnt2 PE=1 SV=2
contig_7dpi0018700	0.638987	CAPAM_DANRE mRNA (2'-O-methyladenosine-N(6)-)-methyltransferase OS=Danio rerio OX=7955 GN=pcif1 PE=1 SV=1
contig_7dpi0011167	0.00508905	DDX20_DANRE Probable ATP-dependent RNA helicase DDX20 OS=Danio rerio OX=7955 GN=ddx20 PE=3 SV=1
contig_7dpi0011382	7.61465e-50	TOLIP_SALSA Toll-interacting protein OS=Salmo salar OX=8030 GN=tollip PE=2 SV=1
contig_7dpi0018001	1.40766e-10	TEN3_DANRE Teneurin-3 OS=Danio rerio OX=7955 GN=tenm3 PE=2 SV=2
contig_7dpi0034060	3.50069	AOF_ONCMY Amine oxidase [flavin-containing] OS=Oncorhynchus mykiss OX=8022 GN=mao PE=2 SV=2
contig_7dpi0063595	1.47327	HGH1_DANRE Protein HGH1 homolog OS=Danio rerio OX=7955 GN=hgh1 PE=2 SV=1
contig_7dpi0106975	0.10842	DTD2_DANRE D-aminoacyl-tRNA deacylase 2 OS=Danio rerio OX=7955 GN=dtd2 PE=1 SV=1
contig_7dpi0020260	4.0575	DUS27_DANRE Inactive dual specificity phosphatase 27 OS=Danio rerio OX=7955 GN=dusp27 PE=1 SV=1
contig_7dpi0086109	4.27555	SHP2B_DANRE Phosphatidylinositol 3,4,5-trisphosphate 5-phosphatase 2B OS=Danio rerio OX=7955 GN=inppl1b PE=2 SV=1
contig_7dpi0055755	0.288692	EFC4A_DANRE EF-hand calcium-binding domain-containing protein 4A OS=Danio rerio OX=7955 GN=cracr2b PE=2 SV=2
contig_7dpi0053213	1.16021e-08	PKHA7_DANRE Pleckstrin homology domain-containing family A member 7 OS=Danio rerio OX=7955 GN=plekha7 PE=2 SV=2
contig_7dpi0096234		not available
contig_7dpi0148895	0.115516	KIF22_DANRE Kinesin-like protein KIF22 OS=Danio rerio OX=7955 GN=kif22 PE=2 SV=1
contig_7dpi0008837	0.0156924	DHTK1_DANRE Probable 2-oxoglutarate dehydrogenase E1 component DHKTD1, mitochondrial OS=Danio rerio OX=7955 GN=dhtkd1 PE=2 SV=2
contig_7dpi0165752	0.715964	ZN423_DANRE Zinc finger protein 423 OS=Danio rerio OX=7955 GN=znf423 PE=2 SV=1
contig_7dpi0024523	1.04349	SRGP2_DANRE SLIT-ROBO Rho GTPase-activating protein 2 OS=Danio rerio OX=7955 GN=srgap2 PE=2 SV=1
contig_7dpi0057429	1.21477	VPS25_DANRE Vacuolar protein-sorting-associated protein 25 OS=Danio rerio OX=7955 GN=vps25 PE=2 SV=2
contig_7dpi0079221	2.94876	MGP_ARGRE Matrix Gla protein OS=Argyrosomus regius OX=172269 GN=mgp PE=1 SV=1
contig_7dpi0007138	6.02946	LACB2_DANRE Endoribonuclease LACTB2 OS=Danio rerio OX=7955 GN=lactb2 PE=2 SV=1
contig_7dpi0190382	6.72307	POMT2_DANRE Protein O-mannosyl-transferase 2 OS=Danio rerio OX=7955 GN=pomt2 PE=1 SV=1
contig_7dpi0008953	1.34413	AGO3_DANRE Protein argonaute-3 OS=Danio rerio OX=7955 GN=ago3 PE=3 SV=1
contig_7dpi0032929	0.377421	KBP_DANRE KIF-binding protein OS=Danio rerio OX=7955 GN=kifbp PE=2 SV=1
contig_7dpi0053955	1.13053	MPP7_DANRE MAGUK p55 subfamily member 7 OS=Danio rerio OX=7955 GN=mpp7 PE=1 SV=1
contig_7dpi0064159	0.0344817	NIPLB_DANRE Nipped-B-like protein B OS=Danio rerio OX=7955 GN=nipblb PE=2 SV=1
contig_7dpi0002466	0.487368	IFNG1_CARAU Interferon gamma 1 OS=Carassius auratus OX=7957 GN=ifng1 PE=1 SV=1
contig_7dpi0028100	0.420893	MIGA1_DANRE Mitoguardin 1 OS=Danio rerio OX=7955 GN=miga1 PE=2 SV=1
contig_7dpi0007750	4.77532	SUV3_DANRE ATP-dependent RNA helicase SUPV3L1, mitochondrial OS=Danio rerio OX=7955 GN=supv3l1 PE=2 SV=1
contig_7dpi0019328	2.42618	TRFE_GADMO Serotransferrin (Fragment) OS=Gadus morhua OX=8049 GN=tf PE=2 SV=1
contig_7dpi0010574	4.2166e-05	UCP2_CYPCA Mitochondrial uncoupling protein 2 OS=Cyprinus carpio OX=7962 GN=ucp2 PE=2 SV=1
contig_7dpi0061722	7.83838	K1109_DANRE Transmembrane protein KIAA1109 homolog OS=Danio rerio OX=7955 GN=si:ch211-233a24.2 PE=3 SV=1
contig_7dpi0015371	9.05131	TDT_ONCMY DNA nucleotidylexotransferase OS=Oncorhynchus mykiss OX=8022 GN=dntt PE=2 SV=1
contig_7dpi0043310	0.492579	EMC7_DANRE ER membrane protein complex subunit 7 OS=Danio rerio OX=7955 GN=emc7 PE=2 SV=1
contig_7dpi0071697	1.20377	CNT1A_DANRE Contactin-1a OS=Danio rerio OX=7955 GN=cntn1a PE=2 SV=1
contig_7dpi0013020	7.40376	SERC5_DANRE Serine incorporator 5 OS=Danio rerio OX=7955 GN=serinc5 PE=2 SV=1
contig_7dpi0013450	1.39616e-17	RGRF2_DANRE Ras-specific guanine nucleotide-releasing factor 2 OS=Danio rerio OX=7955 GN=rasgrf2 PE=3 SV=1
contig_7dpi0030958	2.54118	ATOH7_DANRE Protein atonal homolog 7 OS=Danio rerio OX=7955 GN=atoh7 PE=1 SV=1
contig_7dpi0048774	0.198712	VP33B_DANRE Vacuolar protein sorting-associated protein 33B OS=Danio rerio OX=7955 GN=vps33b PE=2 SV=1
contig_7dpi0060802	0.614301	UHRF1_DANRE E3 ubiquitin-protein ligase UHRF1 OS=Danio rerio OX=7955 GN=uhrf1 PE=1 SV=1
contig_7dpi0046073	0.641688	IL1B_ONCMY Interleukin-1 beta OS=Oncorhynchus mykiss OX=8022 GN=il1b PE=2 SV=1
contig_7dpi0000590	9.00911	CP1A1_MICTO Cytochrome P450 1A1 OS=Microgadus tomcod OX=34823 GN=cyp1a1 PE=2 SV=1
contig_7dpi0152009	1.67843	DIX1A_DANRE Dixin-A OS=Danio rerio OX=7955 GN=dixdc1a PE=1 SV=1
contig_7dpi0017176	0.564666	R213B_DANRE E3 ubiquitin-protein ligase rnf213-beta OS=Danio rerio OX=7955 GN=rnf213b PE=3 SV=1
contig_7dpi0049932	1.75474e-08	GULP1_DANRE PTB domain-containing engulfment adapter protein 1 OS=Danio rerio OX=7955 GN=gulp1 PE=2 SV=1
contig_7dpi0071271	0.0261094	SUSD4_DANRE Sushi domain-containing protein 4 OS=Danio rerio OX=7955 GN=susd4 PE=3 SV=1
contig_7dpi0005722	1.79904	ESRP2_DANRE Epithelial splicing regulatory protein 2 OS=Danio rerio OX=7955 GN=esrp2 PE=2 SV=2
contig_7dpi0096884	1.26851	GLPK5_DANRE Putative glycerol kinase 5 OS=Danio rerio OX=7955 GN=gk5 PE=2 SV=1
contig_7dpi0110472	0.123422	NATT4_THANI Natterin-4 OS=Thalassophryne nattereri OX=289382 PE=2 SV=1
contig_7dpi0049019	3.40487	AP2D_DANRE Transcription factor AP-2-delta OS=Danio rerio OX=7955 GN=tfap2d PE=2 SV=1
contig_7dpi0127467	3.37781	ENDUC_DANRE Poly(U)-specific endoribonuclease-C OS=Danio rerio OX=7955 GN=endouc PE=2 SV=1
contig_7dpi0090692	2.51507	XIRP1_DANRE Xin actin-binding repeat-containing protein 1 OS=Danio rerio OX=7955 GN=xirp1 PE=1 SV=1
contig_7dpi0113457	1.07805e-30	HELZ_DANRE Probable helicase with zinc finger domain OS=Danio rerio OX=7955 GN=helz PE=2 SV=1
contig_7dpi0197219	0.400013	TRIPC_DANRE E3 ubiquitin-protein ligase TRIP12 OS=Danio rerio OX=7955 GN=trip12 PE=3 SV=1
contig_7dpi0022733	3.28827	H2A_HIPHI Histone H2A (Fragment) OS=Hippoglossus hippoglossus OX=8267 PE=1 SV=2
contig_7dpi0013427	8.81916	KEP1B_DANRE Kelch-like ECH-associated protein 1B OS=Danio rerio OX=7955 GN=keap1b PE=1 SV=1
contig_7dpi0064804	0.0141528	MBN2A_TAKRU Muscleblind-like protein 2a OS=Takifugu rubripes OX=31033 GN=mbnl2a PE=2 SV=1
contig_7dpi0114113	3.87388	TRD7A_DANRE Tudor domain-containing protein 7A OS=Danio rerio OX=7955 GN=tdrd7a PE=2 SV=2
contig_7dpi0021287	7.13876	FOS_TETFL Proto-oncogene c-Fos OS=Tetraodon fluviatilis OX=47145 GN=fos PE=3 SV=1
contig_7dpi0092850	1.87382	HV05_CARAU Ig heavy chain V region 5A OS=Carassius auratus OX=7957 PE=4 SV=1
contig_7dpi0055083	0.47904	OLF3B_DANRE Olfactomedin-like protein 3B OS=Danio rerio OX=7955 GN=olfml3b PE=2 SV=1
contig_7dpi0015372	0.179403	T168A_DANRE Transmembrane protein 168-A OS=Danio rerio OX=7955 GN=tmem168a PE=3 SV=1
contig_7dpi0036798	2.01632	SELO1_DANRE Protein adenylyltransferase SelO-1, mitochondrial OS=Danio rerio OX=7955 GN=selenoo1 PE=3 SV=2
contig_7dpi0022768	1.16907	KANL3_DANRE KAT8 regulatory NSL complex subunit 3 OS=Danio rerio OX=7955 GN=kansl3 PE=2 SV=1
contig_7dpi0308502	6.10114	SNF5_TETFL SWI/SNF-related matrix-associated actin-dependent regulator of chromatin subfamily B member 1 OS=Tetraodon fluviatilis OX=47145 GN=smarcb1 PE=3 SV=1
contig_7dpi0036042	0.469019	ESR1_ORYLA Estrogen receptor OS=Oryzias latipes OX=8090 GN=esr1 PE=2 SV=2
contig_7dpi0130426	1.85042	PLPP7_DANRE Inactive phospholipid phosphatase 7 OS=Danio rerio OX=7955 GN=plpp7 PE=2 SV=1
contig_7dpi0096943	4.0216	WASC3_DANRE WASH complex subunit 3 OS=Danio rerio OX=7955 GN=washc3 PE=2 SV=1
contig_7dpi0084767	5.46088	MRM3B_DANRE rRNA methyltransferase 3B, mitochondrial OS=Danio rerio OX=7955 GN=rnmtl1b PE=2 SV=2
contig_7dpi0068774	1.43596	CRA1A_DANRE Collagen alpha-1(XXVII) chain A OS=Danio rerio OX=7955 GN=col27a1a PE=2 SV=1
contig_7dpi0033531	0.0300727	EPO_TETNG Erythropoietin OS=Tetraodon nigroviridis OX=99883 GN=epo PE=2 SV=1
contig_7dpi0219012	2.59732	SMY2A_DANRE N-lysine methyltransferase SMYD2-A OS=Danio rerio OX=7955 GN=smyd2a PE=2 SV=1
contig_7dpi0060163	1.61367e-109	STK3_DANRE Serine/threonine-protein kinase 3 OS=Danio rerio OX=7955 GN=stk3 PE=2 SV=1
contig_7dpi0040807	2.00913	DECR2_DANRE Peroxisomal 2,4-dienoyl-CoA reductase OS=Danio rerio OX=7955 GN=decr2 PE=2 SV=1
contig_7dpi0064992	7.02137	SPT4H_DANRE Transcription elongation factor SPT4 OS=Danio rerio OX=7955 GN=supt4h1 PE=3 SV=1
contig_7dpi0056991	0.831122	NIPLB_DANRE Nipped-B-like protein B OS=Danio rerio OX=7955 GN=nipblb PE=2 SV=1
contig_7dpi0037626	1.78019e-07	E4F1_DANRE Transcription factor E4F1 OS=Danio rerio OX=7955 GN=e4f1 PE=2 SV=1
contig_7dpi0007312	0	K1109_DANRE Transmembrane protein KIAA1109 homolog OS=Danio rerio OX=7955 GN=si:ch211-233a24.2 PE=3 SV=1
contig_7dpi0113806	1.11003	EM55_TAKRU 55 kDa erythrocyte membrane protein OS=Takifugu rubripes OX=31033 GN=mpp1 PE=3 SV=1
contig_7dpi0042901	5.18836e-28	AP2MA_DANRE AP-2 complex subunit mu-A OS=Danio rerio OX=7955 GN=ap2m1a PE=2 SV=1
contig_7dpi0039107	0	NR2F5_DANRE Nuclear receptor subfamily 2 group F member 5 OS=Danio rerio OX=7955 GN=nr2f5 PE=2 SV=1
contig_7dpi0040364	2.96703	MSMO1_DANRE Methylsterol monooxygenase 1 OS=Danio rerio OX=7955 GN=msmo1 PE=2 SV=1
contig_7dpi0008171	2.31703e-14	A1AT_CYPCA Alpha-1-antitrypsin homolog OS=Cyprinus carpio OX=7962 PE=2 SV=1
contig_7dpi0004696	0.304133	SAMH1_DANRE Deoxynucleoside triphosphate triphosphohydrolase SAMHD1 OS=Danio rerio OX=7955 GN=samhd1 PE=2 SV=2
contig_7dpi0091582	3.61712	CCNE1_DANRE G1/S-specific cyclin-E1 OS=Danio rerio OX=7955 GN=ccne1 PE=2 SV=1
contig_7dpi0119007	4.56657	GRT1A_DANRE Growth hormone-regulated TBC protein 1-A OS=Danio rerio OX=7955 GN=grtp1a PE=2 SV=1
contig_7dpi0008490		not available
contig_7dpi0068438	0.0345139	CNEPB_DANRE CTD nuclear envelope phosphatase 1B OS=Danio rerio OX=7955 GN=ctdnep1b PE=2 SV=1
contig_7dpi0029124	1.79927	PTPRC_CYPCA Receptor-type tyrosine-protein phosphatase C OS=Cyprinus carpio OX=7962 GN=ptprc PE=2 SV=1
contig_7dpi0013360	6.71944	OPSG1_ASTFA Green-sensitive opsin-1 OS=Astyanax fasciatus OX=223369 GN=G103 PE=1 SV=1
contig_7dpi0007802	1.31381	PUT2_TAKRU Putative protein 2 (Fragment) OS=Takifugu rubripes OX=31033 PE=3 SV=1
contig_7dpi0030432	3.10246	ELP4_DANRE Elongator complex protein 4 OS=Danio rerio OX=7955 GN=elp4 PE=2 SV=2
contig_7dpi0040084	1.08479	SHA9B_DANRE Protein shisa-9B OS=Danio rerio OX=7955 GN=shisa9b PE=2 SV=1
contig_7dpi0002175	4.26026	GGACB_DANRE Gamma-glutamylaminecyclotransferase B OS=Danio rerio OX=7955 GN=ggact.2 PE=2 SV=1
contig_7dpi0280203	0.117729	SMAD5_DANRE Mothers against decapentaplegic homolog 5 OS=Danio rerio OX=7955 GN=smad5 PE=2 SV=1
contig_7dpi0007804	0.457679	KITA_DANRE Mast/stem cell growth factor receptor kita OS=Danio rerio OX=7955 GN=kita PE=2 SV=2
contig_7dpi0165836	6.30644	TM147_DANRE Transmembrane protein 147 OS=Danio rerio OX=7955 GN=tmem147 PE=2 SV=1
contig_7dpi0024472	1.16326	ENPP6_DANRE Ectonucleotide pyrophosphatase/phosphodiesterase family member 6 OS=Danio rerio OX=7955 GN=enpp6 PE=2 SV=1
contig_7dpi0015982	0.00228657	CALRL_ONCGO Calcitonin gene-related peptide type 1 receptor OS=Oncorhynchus gorbuscha OX=8017 GN=calcrl PE=2 SV=1
contig_7dpi0088052	0.857465	R1442_DANRE Probable E3 ubiquitin-protein ligase RNF144A-B OS=Danio rerio OX=7955 GN=rnf144ab PE=2 SV=1
contig_7dpi0024314	1.1295	TEN4_DANRE Teneurin-4 OS=Danio rerio OX=7955 GN=tenm4 PE=2 SV=1
contig_7dpi0128170	1.17202	PATL1_DANRE Protein PAT1 homolog 1 OS=Danio rerio OX=7955 GN=patl1 PE=1 SV=1
contig_7dpi0099888	3.76601	DCR1C_DANRE Protein artemis OS=Danio rerio OX=7955 GN=dclre1c PE=2 SV=1
contig_7dpi0019665	7.26391	NANO1_DANRE Nanos homolog 1 OS=Danio rerio OX=7955 GN=nanos1 PE=2 SV=1
contig_7dpi0064820	3.54368	LFN1L_DANRE Leucine-rich repeat and fibronectin type III domain-containing protein 1-like protein OS=Danio rerio OX=7955 GN=lrfn1l PE=2 SV=1
contig_7dpi0006742	3.12404	AOF_DANRE Amine oxidase [flavin-containing] OS=Danio rerio OX=7955 GN=mao PE=1 SV=1
contig_7dpi0001669	5.41141e-26	NLRC5_ICTPU Protein NLRC5 OS=Ictalurus punctatus OX=7998 GN=nlrc5 PE=2 SV=1
contig_7dpi0058469	0.155954	TBC23_DANRE TBC1 domain family member 23 OS=Danio rerio OX=7955 GN=tbc1d23 PE=2 SV=1
contig_7dpi0011249	0.960326	SEM3D_DANRE Semaphorin-3D OS=Danio rerio OX=7955 GN=sema3d PE=2 SV=1
contig_7dpi0108838	0.505272	EFNA5_DANRE Ephrin-A5b OS=Danio rerio OX=7955 GN=efna5b PE=2 SV=1
contig_7dpi0105909	0.194889	RN145_DANRE RING finger protein 145 OS=Danio rerio OX=7955 GN=rnf145 PE=2 SV=1
contig_7dpi0094448	3.48636	CEIP2_DANRE Cell surface hyaluronidase OS=Danio rerio OX=7955 GN=cemip2 PE=1 SV=1
contig_7dpi0025074		not available
contig_7dpi0009738	6.17157e-49	A4_TAKRU Amyloid-beta A4 protein OS=Takifugu rubripes OX=31033 GN=app PE=3 SV=1
contig_7dpi0005026	0	JAK1_DANRE Tyrosine-protein kinase JAK1 OS=Danio rerio OX=7955 GN=jak1 PE=1 SV=1
contig_7dpi0074698	2.56582	UFL1_DANRE E3 UFM1-protein ligase 1 OS=Danio rerio OX=7955 GN=ufl1 PE=2 SV=1
contig_7dpi0014419	3.35529e-06	TMX2A_DANRE Thioredoxin-related transmembrane protein 2-A OS=Danio rerio OX=7955 GN=tmx2a PE=2 SV=1
contig_7dpi0065316	1.45706e-157	COPB_DANRE Coatomer subunit beta OS=Danio rerio OX=7955 GN=copb1 PE=2 SV=1
contig_7dpi0034713	5.3943e-07	GTR12_DANRE Solute carrier family 2, facilitated glucose transporter member 12 OS=Danio rerio OX=7955 GN=slc2a12 PE=2 SV=2
contig_7dpi0058536	0.132962	P2R3C_DANRE Serine/threonine-protein phosphatase 2A regulatory subunit B'' subunit gamma OS=Danio rerio OX=7955 GN=ppp2r3c PE=2 SV=1
contig_7dpi0342236		not available
contig_7dpi0050319	0.988403	NLS1B_DANRE Sodium-dependent lysophosphatidylcholine symporter 1-B OS=Danio rerio OX=7955 GN=mfsd2ab PE=2 SV=1
contig_7dpi0048012	0.0470296	PA24A_DANRE Cytosolic phospholipase A2 OS=Danio rerio OX=7955 GN=pla2g4a PE=2 SV=1
contig_7dpi0024304	0.108922	SOX3_DANRE Transcription factor Sox-3 OS=Danio rerio OX=7955 GN=sox3 PE=1 SV=1
contig_7dpi0017957	1.52932e-26	APJA_DANRE Apelin receptor A OS=Danio rerio OX=7955 GN=aplnra PE=1 SV=2
contig_7dpi0041505	0.137227	GBB1_DANRE Guanine nucleotide-binding protein G(I)/G(S)/G(T) subunit beta-1 OS=Danio rerio OX=7955 GN=gnb1 PE=2 SV=1
contig_7dpi0105409	2.0423e-08	GTR12_DANRE Solute carrier family 2, facilitated glucose transporter member 12 OS=Danio rerio OX=7955 GN=slc2a12 PE=2 SV=2
contig_7dpi0026335	7.60014e-153	TGT_DANRE Queuine tRNA-ribosyltransferase catalytic subunit 1 OS=Danio rerio OX=7955 GN=qtrt1 PE=2 SV=1
contig_7dpi0105677	2.28169	PK1L1_ORYLA Polycystic kidney disease 1 like 1 OS=Oryzias latipes OX=8090 GN=pkd1l1 PE=1 SV=2
contig_7dpi0023149	0.750783	CHRD_DANRE Chordin OS=Danio rerio OX=7955 GN=chd PE=2 SV=1
contig_7dpi0025747	3.25602e-08	KPCB_DANRE Protein kinase C beta type OS=Danio rerio OX=7955 GN=prkcbb PE=2 SV=1
contig_7dpi0013708	0.0338793	APOA1_DANRE Apolipoprotein A-I OS=Danio rerio OX=7955 GN=apoa1 PE=2 SV=1
contig_7dpi0014330	0	AT2B2_OREMO Plasma membrane calcium-transporting ATPase 2 (Fragment) OS=Oreochromis mossambicus OX=8127 GN=atp2b2 PE=2 SV=1
contig_7dpi0009914	4.80772	R213B_DANRE E3 ubiquitin-protein ligase rnf213-beta OS=Danio rerio OX=7955 GN=rnf213b PE=3 SV=1
contig_7dpi0019641	5.47757e-92	A4_TAKRU Amyloid-beta A4 protein OS=Takifugu rubripes OX=31033 GN=app PE=3 SV=1
contig_7dpi0051144	1.0561e-45	RAP1B_CYPCA Ras-related protein Rap-1b OS=Cyprinus carpio OX=7962 GN=rap1b PE=2 SV=1
contig_7dpi0193811	0.207104	WN10A_DANRE Protein Wnt-10a OS=Danio rerio OX=7955 GN=wnt10a PE=1 SV=1
contig_7dpi0022694	0.812209	BCL9L_DANRE B-cell CLL/lymphoma 9-like protein OS=Danio rerio OX=7955 GN=bcl9l PE=2 SV=1
contig_7dpi0052420	0.592282	DI2BA_DANRE Disco-interacting protein 2 homolog B-A OS=Danio rerio OX=7955 GN=dip2ba PE=2 SV=1
contig_7dpi0034050	4.2813	MCA3B_DANRE Protein-methionine sulfoxide oxidase mical3b OS=Danio rerio OX=7955 GN=mical3b PE=3 SV=2
contig_7dpi0236436	1.55399	SOX1B_DANRE Transcription factor Sox-1b OS=Danio rerio OX=7955 GN=sox1b PE=2 SV=1
contig_7dpi0020850	2.06595	PNX_DANRE Homeobox protein pnx OS=Danio rerio OX=7955 GN=pnx PE=1 SV=1
contig_7dpi0049513	0.0646862	UBC9_PAGMA SUMO-conjugating enzyme UBC9 OS=Pagrus major OX=143350 GN=ube2i PE=2 SV=1
contig_7dpi0073728		not available
contig_7dpi0040956	2.00025	DUPD1_DANRE Dual specificity phosphatase DUPD1 OS=Danio rerio OX=7955 GN=dupd1 PE=2 SV=1
contig_7dpi0104781	0.918297	PRTGB_DANRE Protogenin B (Fragment) OS=Danio rerio OX=7955 GN=prtgb PE=2 SV=1
contig_7dpi0089613	2.99933	NGDN_DANRE Neuroguidin OS=Danio rerio OX=7955 GN=ngdn PE=2 SV=1
contig_7dpi0007904	5.07248	EMC2_DANRE ER membrane protein complex subunit 2 OS=Danio rerio OX=7955 GN=emc2 PE=2 SV=1
contig_7dpi0022435	1.35057	CE162_DANRE Centrosomal protein of 162 kDa OS=Danio rerio OX=7955 GN=cep162 PE=2 SV=1
contig_7dpi0025317	0.39313	KPCB_DANRE Protein kinase C beta type OS=Danio rerio OX=7955 GN=prkcbb PE=2 SV=1
contig_7dpi0029896	3.57949e-06	NRP1A_DANRE Neuropilin-1a OS=Danio rerio OX=7955 GN=nrp1a PE=2 SV=1
contig_7dpi0048224	1.14213	PRP39_DANRE Pre-mRNA-processing factor 39 OS=Danio rerio OX=7955 GN=prpf39 PE=2 SV=2
contig_7dpi0127394		not available
contig_7dpi0001330	0.309854	CYSLP_CLABA Cystatin-like protein OS=Clarias batrachus OX=59899 PE=2 SV=1
contig_7dpi0006093	0.00515743	DDX20_DANRE Probable ATP-dependent RNA helicase DDX20 OS=Danio rerio OX=7955 GN=ddx20 PE=3 SV=1
contig_7dpi0021579	8.37591e-75	DDX46_DANRE Probable ATP-dependent RNA helicase DDX46 OS=Danio rerio OX=7955 GN=ddx46 PE=2 SV=1
contig_7dpi0051347	3.29589	TRD7A_DANRE Tudor domain-containing protein 7A OS=Danio rerio OX=7955 GN=tdrd7a PE=2 SV=2
contig_7dpi0102165	0.889725	SEP8A_DANRE Septin-8-A OS=Danio rerio OX=7955 GN=sept8a PE=2 SV=2
contig_7dpi0018408	0.000215656	TNNC2_ANGAN Troponin C, skeletal muscle OS=Anguilla anguilla OX=7936 PE=1 SV=1
contig_7dpi0069032	0.117855	DLLC_DANRE Delta-like protein C OS=Danio rerio OX=7955 GN=dlc PE=2 SV=1
contig_7dpi0078802	1.12233	CYB_ZENNE Cytochrome b OS=Zenopsis nebulosa OX=94939 GN=mt-cyb PE=3 SV=1
contig_7dpi0085240	0.0979091	ATP9B_DANRE Probable phospholipid-transporting ATPase IIB OS=Danio rerio OX=7955 GN=atp9b PE=3 SV=1
contig_7dpi0325231	1.41495	GCNFA_DANRE Nuclear receptor subfamily 6 group A member 1-A OS=Danio rerio OX=7955 GN=nr6a1a PE=2 SV=2
contig_7dpi0024739	6.62195e-19	OLF3A_DANRE Olfactomedin-like protein 3A OS=Danio rerio OX=7955 GN=olfml3a PE=2 SV=2
contig_7dpi0092407	0.46945	B3AT_ONCMY Band 3 anion exchange protein OS=Oncorhynchus mykiss OX=8022 GN=slc4a1 PE=2 SV=2
contig_7dpi0085705	1.45871	UBP13_DANRE Ubiquitin carboxyl-terminal hydrolase 13 OS=Danio rerio OX=7955 GN=usp13 PE=2 SV=1
contig_7dpi0026567	0.00584683	FBXL5_DANRE F-box/LRR-repeat protein 5 OS=Danio rerio OX=7955 GN=fbxl5 PE=2 SV=2
contig_7dpi0039676	6.31536	CREL2_DANRE Cysteine-rich with EGF-like domain protein 2 OS=Danio rerio OX=7955 GN=creld2 PE=2 SV=2
contig_7dpi0096084	3.60892e-09	CADH2_DANRE Cadherin-2 OS=Danio rerio OX=7955 GN=cdh2 PE=1 SV=2
contig_7dpi0011915	1.10911	ATPB_CYPCA ATP synthase subunit beta, mitochondrial OS=Cyprinus carpio OX=7962 GN=ATP5F1B PE=2 SV=1
contig_7dpi0000215	0.198919	FMNL3_DANRE Formin-like protein 3 OS=Danio rerio OX=7955 GN=fmnl3 PE=2 SV=2
contig_7dpi0042569	1.7929	FA53B_DANRE Protein FAM53B OS=Danio rerio OX=7955 GN=fam53b PE=1 SV=1
contig_7dpi0035277	4.55579e-14	SIAT2_ORYLA Beta-galactoside alpha-2,6-sialyltransferase 2 OS=Oryzias latipes OX=8090 GN=st6gal2 PE=2 SV=1
contig_7dpi0046580	1.59321	ADA2C_DANRE Alpha-2C adrenergic receptor OS=Danio rerio OX=7955 GN=adra2c PE=3 SV=1
contig_7dpi0100556	2.09156	TLE3B_DANRE Transducin-like enhancer protein 3-B OS=Danio rerio OX=7955 GN=tle3b PE=1 SV=2
contig_7dpi0034211	3.06947e-12	PKN2_DANRE Serine/threonine-protein kinase N2 OS=Danio rerio OX=7955 GN=pkn2 PE=2 SV=1
contig_7dpi0027905	9.93616e-30	STXB_SYNHO Stonustoxin subunit beta OS=Synanceia horrida OX=13279 PE=1 SV=3
contig_7dpi0053650	0.000191906	PTPRF_DANRE Receptor-type tyrosine-protein phosphatase F OS=Danio rerio OX=7955 GN=ptprf PE=2 SV=1
contig_7dpi0079158	0.308007	OTO1A_DANRE Otolin-1-A OS=Danio rerio OX=7955 GN=otol1a PE=1 SV=1
contig_7dpi0022465	5.28301	LST2_DANRE Lateral signaling target protein 2 homolog OS=Danio rerio OX=7955 GN=zfyve28 PE=2 SV=1
contig_7dpi0019205	0.443224	KD5BB_DANRE Lysine-specific demethylase 5B-B OS=Danio rerio OX=7955 GN=kdm5bb PE=2 SV=2
contig_7dpi0012249	0.000633468	COPB_DANRE Coatomer subunit beta OS=Danio rerio OX=7955 GN=copb1 PE=2 SV=1
contig_7dpi0010730	1.99603	TBB1_GADMO Tubulin beta-1 chain OS=Gadus morhua OX=8049 PE=2 SV=1
contig_7dpi0088168	0.228864	LMD2B_DANRE G-protein coupled receptor-associated protein LMBRD2B OS=Danio rerio OX=7955 GN=lmbrd2b PE=2 SV=1
contig_7dpi0042101	0.539229	PDE11_TAKRU Dual 3',5'-cyclic-AMP and -GMP phosphodiesterase 11A OS=Takifugu rubripes OX=31033 GN=pde11a PE=3 SV=1
contig_7dpi0025283	0.714365	LGR6_DANRE Leucine-rich repeat-containing G-protein coupled receptor 6 OS=Danio rerio OX=7955 GN=lgr6 PE=2 SV=1
contig_7dpi0015950	7.99034e-175	GBB1_DANRE Guanine nucleotide-binding protein G(I)/G(S)/G(T) subunit beta-1 OS=Danio rerio OX=7955 GN=gnb1 PE=2 SV=1
contig_7dpi0013428	5.79166	KEP1B_DANRE Kelch-like ECH-associated protein 1B OS=Danio rerio OX=7955 GN=keap1b PE=1 SV=1
contig_7dpi0014473	0.144598	CDK20_DANRE Cyclin-dependent kinase 20 OS=Danio rerio OX=7955 GN=cdk20 PE=2 SV=1
contig_7dpi0010445	0.904565	APEX1_DANRE DNA-(apurinic or apyrimidinic site) lyase OS=Danio rerio OX=7955 GN=apex1 PE=1 SV=1
contig_7dpi0076895		not available
contig_7dpi0223280	0.617103	ESRP2_DANRE Epithelial splicing regulatory protein 2 OS=Danio rerio OX=7955 GN=esrp2 PE=2 SV=2
contig_7dpi0014215	1.02173	MIRO1_DANRE Mitochondrial Rho GTPase 1-A OS=Danio rerio OX=7955 GN=rhot1a PE=2 SV=1
contig_7dpi0002897	0	PSM4B_DANRE Proteasome activator complex subunit 4B OS=Danio rerio OX=7955 GN=psme4b PE=3 SV=2
contig_7dpi0041367	1.41251	ACY3B_DANRE N-acyl-aromatic-L-amino acid amidohydrolase (carboxylate-forming) B OS=Danio rerio OX=7955 GN=acy3.2 PE=2 SV=1
contig_7dpi0049068	0.56468	ALKB6_DANRE Alpha-ketoglutarate-dependent dioxygenase alkB homolog 6 OS=Danio rerio OX=7955 GN=alkbh6 PE=2 SV=1
contig_7dpi0004582	4.89145	CNT1A_DANRE Contactin-1a OS=Danio rerio OX=7955 GN=cntn1a PE=2 SV=1
contig_7dpi0032171	1.24147e-79	DNM1L_DANRE Dynamin-1-like protein OS=Danio rerio OX=7955 GN=dnm1l PE=2 SV=1
contig_7dpi0031572	0.321937	NR1AA_DANRE Neurexin-1a OS=Danio rerio OX=7955 GN=nrxn1a PE=2 SV=1
contig_7dpi0004808	2.87627e-24	LFNG_DANRE Beta-1,3-N-acetylglucosaminyltransferase lunatic fringe OS=Danio rerio OX=7955 GN=lfng PE=2 SV=2
contig_7dpi0052313	3.44099e-46	GNPTA_DANRE N-acetylglucosamine-1-phosphotransferase subunits alpha/beta OS=Danio rerio OX=7955 GN=gnptab PE=1 SV=1
contig_7dpi0004180	1.47051	HXB1A_TAKRU Homeobox protein Hox-B1a OS=Takifugu rubripes OX=31033 GN=hoxb1a PE=3 SV=1
contig_7dpi0023455	2.32173e-16	LECG_THANI Galactose-specific lectin nattectin OS=Thalassophryne nattereri OX=289382 PE=1 SV=1
contig_7dpi0018038	1.7527	CHSTB_DANRE Carbohydrate sulfotransferase 11 OS=Danio rerio OX=7955 GN=chst11 PE=2 SV=1
contig_7dpi0006920	2.41997	FGFR4_DANRE Fibroblast growth factor receptor 4 OS=Danio rerio OX=7955 GN=fgfr4 PE=1 SV=1
contig_7dpi0030078	0.0460568	PARP1_ONCMA Poly [ADP-ribose] polymerase 1 (Fragment) OS=Oncorhynchus masou OX=8020 GN=parp1 PE=2 SV=2
contig_7dpi0039126	3.34364	ESRP2_DANRE Epithelial splicing regulatory protein 2 OS=Danio rerio OX=7955 GN=esrp2 PE=2 SV=2
contig_7dpi0022591		not available
contig_7dpi0072692	0.765258	GARL3_DANRE GTPase-activating Rap/Ran-GAP domain-like protein 3 OS=Danio rerio OX=7955 GN=garnl3 PE=3 SV=1
contig_7dpi0075225	9.05473e-05	ERAL1_DANRE GTPase Era, mitochondrial OS=Danio rerio OX=7955 GN=eral1 PE=2 SV=1
contig_7dpi0033206	0.00886408	TMM71_DANRE Transmembrane protein 71 OS=Danio rerio OX=7955 GN=tmem71 PE=3 SV=1
contig_7dpi0031605	1.37779	UBA3_DANRE NEDD8-activating enzyme E1 catalytic subunit OS=Danio rerio OX=7955 GN=uba3 PE=2 SV=1
contig_7dpi0094514	1.58057	SCG3_DANRE Secretogranin-3 OS=Danio rerio OX=7955 GN=scg3 PE=2 SV=1
contig_7dpi0009511	0.756417	XIRP1_DANRE Xin actin-binding repeat-containing protein 1 OS=Danio rerio OX=7955 GN=xirp1 PE=1 SV=1
contig_7dpi0012681	5.11661e-92	RHG29_DANRE Rho GTPase-activating protein 29 OS=Danio rerio OX=7955 GN=arhgap29 PE=2 SV=1
contig_7dpi0121777	0.0584306	ADA2C_DANRE Alpha-2C adrenergic receptor OS=Danio rerio OX=7955 GN=adra2c PE=3 SV=1
contig_7dpi0061980	3.61458	RBM18_DANRE Probable RNA-binding protein 18 OS=Danio rerio OX=7955 GN=rbm18 PE=2 SV=1
contig_7dpi0007824	3.06349	DMT3A_DANRE Doublesex- and mab-3-related transcription factor 3a OS=Danio rerio OX=7955 GN=dmrt3a PE=1 SV=2
contig_7dpi0027140	0	VAT1_DANRE Synaptic vesicle membrane protein VAT-1 homolog OS=Danio rerio OX=7955 GN=vat1 PE=2 SV=1
contig_7dpi0038239	0.744039	THAB_PAROL Thyroid hormone receptor alpha-B OS=Paralichthys olivaceus OX=8255 GN=thra2 PE=2 SV=1
contig_7dpi0044781		not available
contig_7dpi0039517	0.166394	UBR3_DANRE E3 ubiquitin-protein ligase ubr3 OS=Danio rerio OX=7955 GN=ubr3 PE=2 SV=2
contig_7dpi0032853	1.88173	PYYA_DANRE Peptide YY-A OS=Danio rerio OX=7955 GN=pyya PE=2 SV=1
contig_7dpi0077410	2.27438	S10A1_MISFO Protein S100-A1 OS=Misgurnus fossilis OX=7984 GN=s100a1 PE=1 SV=1
contig_7dpi0048171	3.66313e-113	AT2B2_OREMO Plasma membrane calcium-transporting ATPase 2 (Fragment) OS=Oreochromis mossambicus OX=8127 GN=atp2b2 PE=2 SV=1
contig_7dpi0137170	0.748266	AL8A1_DANRE 2-aminomuconic semialdehyde dehydrogenase OS=Danio rerio OX=7955 GN=aldh8a1 PE=2 SV=1
contig_7dpi0013550	2.01435	T161B_DANRE Transmembrane protein 161B OS=Danio rerio OX=7955 GN=tmem161b PE=2 SV=1
contig_7dpi0201595	2.27107	SCG3_DANRE Secretogranin-3 OS=Danio rerio OX=7955 GN=scg3 PE=2 SV=1
contig_7dpi0062746	2.06846	R213A_DANRE E3 ubiquitin-protein ligase rnf213-alpha OS=Danio rerio OX=7955 GN=rnf213a PE=3 SV=1
contig_7dpi0034332	6.41344	NR1AA_DANRE Neurexin-1a OS=Danio rerio OX=7955 GN=nrxn1a PE=2 SV=1
contig_7dpi0318178	7.91413	LMOD3_DANRE Leiomodin-3 OS=Danio rerio OX=7955 GN=lmod3 PE=1 SV=1
contig_7dpi0075417	0.973177	LAMB4_DANRE Laminin subunit beta-4 OS=Danio rerio OX=7955 GN=lamb4 PE=2 SV=1
contig_7dpi0082256	3.04274	RUSD4_DANRE Mitochondrial RNA pseudouridine synthase rpusd4 OS=Danio rerio OX=7955 GN=rpusd4 PE=2 SV=1
contig_7dpi0083039	0.542776	MYSM1_DANRE Histone H2A deubiquitinase MYSM1 OS=Danio rerio OX=7955 GN=mysm1 PE=2 SV=2
contig_7dpi0024185	0.799914	SEP8A_DANRE Septin-8-A OS=Danio rerio OX=7955 GN=sept8a PE=2 SV=2
contig_7dpi0027986	1.36939e-75	TLE3B_DANRE Transducin-like enhancer protein 3-B OS=Danio rerio OX=7955 GN=tle3b PE=1 SV=2
contig_7dpi0009017	3.07176e-110	SEM3D_DANRE Semaphorin-3D OS=Danio rerio OX=7955 GN=sema3d PE=2 SV=1
contig_7dpi0063791	1.57944	ACHB2_CARAU Neuronal acetylcholine receptor subunit beta-2 (Fragment) OS=Carassius auratus OX=7957 GN=chrnb2 PE=2 SV=1
contig_7dpi0006631	3.45995e-39	HDGR2_DANRE Hepatoma-derived growth factor-related protein 2 OS=Danio rerio OX=7955 GN=hdgfl2 PE=2 SV=2
contig_7dpi0041129	0.225296	AP2MB_DANRE AP-2 complex subunit mu-B OS=Danio rerio OX=7955 GN=ap2m1b PE=2 SV=1
contig_7dpi0001071	0.00460304	DYHC_ONCMY Dynein heavy chain (Fragment) OS=Oncorhynchus mykiss OX=8022 PE=2 SV=1
contig_7dpi0031877	0	SIAT2_TAKRU Beta-galactoside alpha-2,6-sialyltransferase 2 OS=Takifugu rubripes OX=31033 GN=st6gal2 PE=2 SV=1
contig_7dpi0093649	0.242371	L2GL2_DANRE LLGL scribble cell polarity complex component 2 OS=Danio rerio OX=7955 GN=llgl2 PE=1 SV=1
contig_7dpi0035438	5.6582	F172A_DANRE Cotranscriptional regulator FAM172A homolog OS=Danio rerio OX=7955 GN=fam172a PE=2 SV=2
contig_7dpi0092571	3.34652e-26	ZN12_MICSA Zinc finger protein ZFMSA12A OS=Micropterus salmoides OX=27706 PE=2 SV=1
contig_7dpi0086558	1.78255	ASTE1_DANRE Protein asteroid homolog 1 OS=Danio rerio OX=7955 GN=aste1 PE=2 SV=1
contig_7dpi0052385	3.57159e-16	A4_TAKRU Amyloid-beta A4 protein OS=Takifugu rubripes OX=31033 GN=app PE=3 SV=1
contig_7dpi0036888	0.0139481	XPO6_DANRE Exportin-6 OS=Danio rerio OX=7955 GN=xpo6 PE=2 SV=1
contig_7dpi0013702	6.8752	ERGI2_DANRE Endoplasmic reticulum-Golgi intermediate compartment protein 2 OS=Danio rerio OX=7955 GN=ergic2 PE=2 SV=1
contig_7dpi0028192	4.27564	EM55_TAKRU 55 kDa erythrocyte membrane protein OS=Takifugu rubripes OX=31033 GN=mpp1 PE=3 SV=1
contig_7dpi0017900	6.81201	DDX46_DANRE Probable ATP-dependent RNA helicase DDX46 OS=Danio rerio OX=7955 GN=ddx46 PE=2 SV=1
contig_7dpi0025255	0.508839	CNT1A_DANRE Contactin-1a OS=Danio rerio OX=7955 GN=cntn1a PE=2 SV=1
contig_7dpi0099038	5.13412e-28	ARI1_DANRE E3 ubiquitin-protein ligase arih1 OS=Danio rerio OX=7955 GN=arih1 PE=2 SV=1
contig_7dpi0039009	3.4957	STAR_SALFO Steroidogenic acute regulatory protein, mitochondrial OS=Salvelinus fontinalis OX=8038 GN=star PE=2 SV=1
contig_7dpi0069401	2.00762e-11	UEVLD_DANRE Ubiquitin-conjugating enzyme E2 variant 3 OS=Danio rerio OX=7955 GN=uevld PE=2 SV=1
contig_7dpi0013626	1.72681e-22	ZBT24_DANRE Zinc finger and BTB domain-containing protein 24 OS=Danio rerio OX=7955 GN=zbtb24 PE=2 SV=1
contig_7dpi0026671	8.24409e-22	QKIB_DANRE Protein quaking-B OS=Danio rerio OX=7955 GN=qkib PE=2 SV=1
contig_7dpi0000753	1.84778	PKD2_ORYLA Polycystin-2 OS=Oryzias latipes OX=8090 GN=pkd2 PE=1 SV=2
contig_7dpi0021003	0.571283	UHRF1_DANRE E3 ubiquitin-protein ligase UHRF1 OS=Danio rerio OX=7955 GN=uhrf1 PE=1 SV=1
contig_7dpi0001693	2.49257e-61	LRC33_DANRE Transforming growth factor beta activator LRRC33 OS=Danio rerio OX=7955 GN=nrros PE=2 SV=1
contig_7dpi0055900	3.09918	CYHR1_DANRE Cysteine and histidine-rich protein 1 OS=Danio rerio OX=7955 GN=cyhr1 PE=2 SV=1
contig_7dpi0036966	2.19775e-34	OPTN_DANRE Optineurin OS=Danio rerio OX=7955 GN=optn PE=2 SV=2
contig_7dpi0062725	0.211612	DHE3_CHAAC Glutamate dehydrogenase, mitochondrial OS=Chaenocephalus aceratus OX=36190 GN=glud1 PE=1 SV=1
contig_7dpi0077733	6.63485e-05	DCA12_DANRE DDB1- and CUL4-associated factor 12 OS=Danio rerio OX=7955 GN=dcaf12 PE=2 SV=1
contig_7dpi0016413	8.91307e-84	K1109_DANRE Transmembrane protein KIAA1109 homolog OS=Danio rerio OX=7955 GN=si:ch211-233a24.2 PE=3 SV=1
contig_7dpi0081033	0.978412	TDT_ONCMY DNA nucleotidylexotransferase OS=Oncorhynchus mykiss OX=8022 GN=dntt PE=2 SV=1
contig_7dpi0039203	1.58393e-24	ATP9B_DANRE Probable phospholipid-transporting ATPase IIB OS=Danio rerio OX=7955 GN=atp9b PE=3 SV=1
contig_7dpi0026297	1.87326	FXL15_SALSA F-box/LRR-repeat protein 15 OS=Salmo salar OX=8030 GN=fbxl15 PE=2 SV=1
contig_7dpi0006729	2.33409	ESR1_OREAU Estrogen receptor OS=Oreochromis aureus OX=47969 GN=esr1 PE=3 SV=2
contig_7dpi0019805	0.73214	DTD2_DANRE D-aminoacyl-tRNA deacylase 2 OS=Danio rerio OX=7955 GN=dtd2 PE=1 SV=1
contig_7dpi0028895	0.503869	LIPH_DANRE Lipase member H OS=Danio rerio OX=7955 GN=liph PE=2 SV=1
contig_7dpi0031553	1.47218	RIPL2_DANRE RILP-like protein 2 OS=Danio rerio OX=7955 GN=rilpl2 PE=2 SV=2
contig_7dpi0027904	5.06318e-17	STXB_SYNHO Stonustoxin subunit beta OS=Synanceia horrida OX=13279 PE=1 SV=3
contig_7dpi0059781	0.101505	NLS1A_DANRE Sodium-dependent lysophosphatidylcholine symporter 1-A OS=Danio rerio OX=7955 GN=mfsd2aa PE=2 SV=1
contig_7dpi0051096	1.96542e-34	B3G5A_DANRE Lactosylceramide 1,3-N-acetyl-beta-D-glucosaminyltransferase A OS=Danio rerio OX=7955 GN=b3gnt5a PE=2 SV=1
contig_7dpi0025931		not available
contig_7dpi0045084	4.65999e-09	SV91A_DANRE Histone-lysine N-methyltransferase SUV39H1-A OS=Danio rerio OX=7955 GN=suv39h1a PE=2 SV=2
contig_7dpi0038817	9.04914e-109	WDR26_DANRE WD repeat-containing protein 26 OS=Danio rerio OX=7955 GN=wdr26 PE=1 SV=1
contig_7dpi0042041	6.33363	DNMBP_DANRE Dynamin-binding protein OS=Danio rerio OX=7955 GN=dnmbp PE=2 SV=1
contig_7dpi0033823	3.05168e-10	DMTF1_DANRE Cyclin-D-binding Myb-like transcription factor 1 OS=Danio rerio OX=7955 GN=dmtf1 PE=2 SV=1
contig_7dpi0065921	2.02232e-111	SMC6_TAKRU Structural maintenance of chromosomes protein 6 OS=Takifugu rubripes OX=31033 GN=smc6 PE=2 SV=1
contig_7dpi0154917	0.947693	TEN4_DANRE Teneurin-4 OS=Danio rerio OX=7955 GN=tenm4 PE=2 SV=1
contig_7dpi0084452	6.01713e-19	NPHP3_DANRE Nephrocystin-3 OS=Danio rerio OX=7955 GN=nphp3 PE=3 SV=1
contig_7dpi0002136	0.315421	HS90B_DANRE Heat shock protein HSP 90-beta OS=Danio rerio OX=7955 GN=hsp90ab1 PE=1 SV=2
contig_7dpi0027020	0.35525	WDR83_DANRE WD repeat domain-containing protein 83 OS=Danio rerio OX=7955 GN=wdr83 PE=2 SV=1
contig_7dpi0117837	0.255212	PLST_CARAU Plasticin OS=Carassius auratus OX=7957 PE=2 SV=1
contig_7dpi0154399	6.00247	SETD3_DANRE Actin-histidine N-methyltransferase OS=Danio rerio OX=7955 GN=setd3 PE=2 SV=1
contig_7dpi0013609	1.30566e-119	ILF3_DANRE Interleukin enhancer-binding factor 3 homolog OS=Danio rerio OX=7955 GN=ilf3 PE=1 SV=2
contig_7dpi0000068	4.02136	TELO2_DANRE Telomere length regulation protein TEL2 homolog OS=Danio rerio OX=7955 GN=telo2 PE=2 SV=2
contig_7dpi0113907	4.70819	SCMC1_DANRE Calcium-binding mitochondrial carrier protein SCaMC-1 OS=Danio rerio OX=7955 GN=slc25a24 PE=2 SV=1
contig_7dpi0018795	1.4664	CR3L2_DANRE Cyclic AMP-responsive element-binding protein 3-like protein 2 OS=Danio rerio OX=7955 GN=creb3l2 PE=2 SV=1
contig_7dpi0081058		not available
contig_7dpi0172404	1.19198	RHOAA_DANRE Rho-related GTP-binding protein RhoA-A OS=Danio rerio OX=7955 GN=rhoaa PE=1 SV=1
contig_7dpi0008128	0	APAF_DANRE Apoptotic protease-activating factor 1 OS=Danio rerio OX=7955 GN=apaf1 PE=2 SV=1
contig_7dpi0013509	4.54701	GWL_DANRE Serine/threonine-protein kinase greatwall OS=Danio rerio OX=7955 GN=mastl PE=2 SV=1
contig_7dpi0023594	2.58831e-29	DRL_DANRE Zinc finger protein draculin OS=Danio rerio OX=7955 GN=drl PE=2 SV=2
contig_7dpi0026339	2.63616	PTC1_DANRE Protein patched homolog 1 OS=Danio rerio OX=7955 GN=ptch1 PE=2 SV=1
contig_7dpi0002306	7.67146	PYRG1_DANRE CTP synthase 1 OS=Danio rerio OX=7955 GN=ctps1 PE=1 SV=1
contig_7dpi0031911	4.53668	RN168_DANRE E3 ubiquitin-protein ligase rnf168 OS=Danio rerio OX=7955 GN=rnf168 PE=2 SV=1
contig_7dpi0141445		not available
contig_7dpi0030978	2.35405e-08	TRIPC_DANRE E3 ubiquitin-protein ligase TRIP12 OS=Danio rerio OX=7955 GN=trip12 PE=3 SV=1
contig_7dpi0087009	3.04811e-13	RHOAA_DANRE Rho-related GTP-binding protein RhoA-A OS=Danio rerio OX=7955 GN=rhoaa PE=1 SV=1
contig_7dpi0007274	2.16888e-34	FEV_DANRE Protein FEV OS=Danio rerio OX=7955 GN=fev PE=2 SV=1
contig_7dpi0084744	7.19988	ETV4_DANRE ETS translocation variant 4 OS=Danio rerio OX=7955 GN=etv4 PE=1 SV=2
contig_7dpi0039824	0.00148249	PA24A_DANRE Cytosolic phospholipase A2 OS=Danio rerio OX=7955 GN=pla2g4a PE=2 SV=1
contig_7dpi0095456	2.07934	KANL3_DANRE KAT8 regulatory NSL complex subunit 3 OS=Danio rerio OX=7955 GN=kansl3 PE=2 SV=1
contig_7dpi0029952	7.13363e-83	USPL1_DANRE SUMO-specific isopeptidase USPL1 OS=Danio rerio OX=7955 GN=uspl1 PE=1 SV=1
contig_7dpi0046136	2.76874e-47	MK14B_DANRE Mitogen-activated protein kinase 14B OS=Danio rerio OX=7955 GN=mapk14b PE=1 SV=1
contig_7dpi0018197	0.338495	LYG_EPICO Lysozyme g OS=Epinephelus coioides OX=94232 PE=1 SV=1
contig_7dpi0024074	1.26534	IHH_DANRE Indian hedgehog B protein OS=Danio rerio OX=7955 GN=ihhb PE=2 SV=1
contig_7dpi0052545	0.832119	PZR3B_DANRE E3 ubiquitin-protein ligase PDZRN3-B OS=Danio rerio OX=7955 GN=pdzrn3b PE=1 SV=1
contig_7dpi0005388	0.716585	SYVC_TAKRU Valine--tRNA ligase OS=Takifugu rubripes OX=31033 GN=vars PE=3 SV=1
contig_7dpi0054219	2.51016e-84	JAK1_CYPCA Tyrosine-protein kinase JAK1 OS=Cyprinus carpio OX=7962 GN=jak1 PE=2 SV=1
contig_7dpi0339597	5.48276	BI1_PAROL Probable Bax inhibitor 1 OS=Paralichthys olivaceus OX=8255 GN=tmbim6 PE=2 SV=1
contig_7dpi0004790	1.79823	SELW_DANRE Selenoprotein W OS=Danio rerio OX=7955 GN=selenow PE=3 SV=3
contig_7dpi0058823	2.1689e-12	MCA3A_DANRE Protein-methionine sulfoxide oxidase mical3a OS=Danio rerio OX=7955 GN=mical3a PE=2 SV=2
contig_7dpi0065457	0.93006	SHP2B_DANRE Phosphatidylinositol 3,4,5-trisphosphate 5-phosphatase 2B OS=Danio rerio OX=7955 GN=inppl1b PE=2 SV=1
contig_7dpi0014745	4.42989e-59	TSN36_DANRE Tetraspanin-36 OS=Danio rerio OX=7955 GN=tspan36 PE=1 SV=2
contig_7dpi0221700	0.0598326	USPL1_DANRE SUMO-specific isopeptidase USPL1 OS=Danio rerio OX=7955 GN=uspl1 PE=1 SV=1
contig_7dpi0171783	0.281197	BROMI_DANRE Protein broad-minded OS=Danio rerio OX=7955 GN=tbc1d32 PE=3 SV=2
contig_7dpi0110655	3.03498e-16	IGF2_ONCMY Insulin-like growth factor II OS=Oncorhynchus mykiss OX=8022 GN=igf2 PE=2 SV=1
contig_7dpi0085139	1.17137	NSMA5_DANRE Sphingomyelin phosphodiesterase 5 OS=Danio rerio OX=7955 GN=smpd5 PE=1 SV=1
contig_7dpi0046994	2.93356e-10	S38A6_DANRE Probable sodium-coupled neutral amino acid transporter 6 OS=Danio rerio OX=7955 GN=slc38a6 PE=2 SV=1
contig_7dpi0024678	0.830969	CAHZ_DANRE Carbonic anhydrase OS=Danio rerio OX=7955 GN=cahz PE=1 SV=2
contig_7dpi0025256	0.10529	SE1BA_DANRE Histone-lysine N-methyltransferase SETD1B-A OS=Danio rerio OX=7955 GN=setd1ba PE=1 SV=2
contig_7dpi0034222	6.12069	ENO4_DANRE Enolase 4 OS=Danio rerio OX=7955 GN=eno4 PE=2 SV=1
contig_7dpi0012695	2.0149	AT2B2_OREMO Plasma membrane calcium-transporting ATPase 2 (Fragment) OS=Oreochromis mossambicus OX=8127 GN=atp2b2 PE=2 SV=1
contig_7dpi0022431	4.87468e-09	YES_DANRE Tyrosine-protein kinase yes OS=Danio rerio OX=7955 GN=yes1 PE=1 SV=1
contig_7dpi0028338		not available
contig_7dpi0031573	0.0231997	MYO1C_DANRE Unconventional myosin-Ic OS=Danio rerio OX=7955 GN=myo1c PE=3 SV=1
contig_7dpi0078265	0.336259	KS6A6_DANRE Ribosomal protein S6 kinase alpha-6 OS=Danio rerio OX=7955 GN=rps6ka6 PE=2 SV=1
contig_7dpi0015102		not available
contig_7dpi0079292	5.35346e-10	CNT1A_DANRE Contactin-1a OS=Danio rerio OX=7955 GN=cntn1a PE=2 SV=1
contig_7dpi0054844	1.38994e-10	PDLI7_DANRE PDZ and LIM domain protein 7 OS=Danio rerio OX=7955 GN=pdlim7 PE=2 SV=1
contig_7dpi0013301	4.69432e-08	PPR37_DANRE Protein phosphatase 1 regulatory subunit 37 OS=Danio rerio OX=7955 GN=ppp1r37 PE=2 SV=1
contig_7dpi0038647	1.27481e-76	IMA6_DANRE Importin subunit alpha-6 OS=Danio rerio OX=7955 GN=kpna5 PE=2 SV=2
contig_7dpi0066904	1.612	TWF2_DANRE Twinfilin-2 OS=Danio rerio OX=7955 GN=twf2 PE=2 SV=1
contig_7dpi0136298	0.0666526	LSMD1_DANRE N-alpha-acetyltransferase 38, NatC auxiliary subunit OS=Danio rerio OX=7955 GN=naa38 PE=3 SV=1
contig_7dpi0035249	4.26731e-28	MK14A_CYPCA Mitogen-activated protein kinase 14A OS=Cyprinus carpio OX=7962 GN=mapk14a PE=1 SV=1
contig_7dpi0004305	1.03377e-127	VRK1_DANRE Serine/threonine-protein kinase VRK1 OS=Danio rerio OX=7955 GN=vrk1 PE=2 SV=1
contig_7dpi0001148	0.0532888	PRVB3_MERAP Parvalbumin beta 3 (Fragments) OS=Merluccius australis polylepis OX=307685 PE=1 SV=1
contig_7dpi0046962	1.33263	PPB_GADMO Alkaline phosphatase OS=Gadus morhua OX=8049 PE=1 SV=1
contig_7dpi0017527	4.26799	CDHR1_DANRE Cadherin-related family member 1 OS=Danio rerio OX=7955 GN=cdhr1 PE=2 SV=1
contig_7dpi0052032		not available
contig_7dpi0073201	1.52932	MRNIP_DANRE MRN complex-interacting protein OS=Danio rerio OX=7955 GN=mrnip PE=2 SV=1
contig_7dpi0097004	5.71659	VGFR2_DANRE Vascular endothelial growth factor receptor 2 OS=Danio rerio OX=7955 GN=kdr PE=1 SV=2
contig_7dpi0008597	2.58148	PCX1_TAKRU Pecanex-like protein 1 OS=Takifugu rubripes OX=31033 GN=pcnx1 PE=3 SV=1
contig_7dpi0044289	2.5526	R213B_DANRE E3 ubiquitin-protein ligase rnf213-beta OS=Danio rerio OX=7955 GN=rnf213b PE=3 SV=1
contig_7dpi0273976	1.19428	CCNA1_CARAU Cyclin-A1 OS=Carassius auratus OX=7957 GN=ccna1 PE=2 SV=1
contig_7dpi0018426	0.216862	SC31A_DANRE Protein transport protein Sec31A OS=Danio rerio OX=7955 GN=sec31a PE=2 SV=1
contig_7dpi0051108	0.0952141	ERAL1_SALSA GTPase Era, mitochondrial OS=Salmo salar OX=8030 GN=eral1 PE=2 SV=1
contig_7dpi0015934	2.02188	KD5BB_DANRE Lysine-specific demethylase 5B-B OS=Danio rerio OX=7955 GN=kdm5bb PE=2 SV=2
contig_7dpi0004275	0.30366	EEPD1_DANRE Endonuclease/exonuclease/phosphatase family domain-containing protein 1 OS=Danio rerio OX=7955 GN=eepd1 PE=2 SV=1
contig_7dpi0015658	0.691323	VIT2_FUNHE Vitellogenin-2 OS=Fundulus heteroclitus OX=8078 PE=1 SV=1
contig_7dpi0095939	4.15675	RL10A_ICTPU 60S ribosomal protein L10a OS=Ictalurus punctatus OX=7998 GN=rpl10a PE=2 SV=1
contig_7dpi0050472	3.6532	T185L_DANRE Transmembrane protein 185-like OS=Danio rerio OX=7955 GN=zgc:63572 PE=2 SV=1
contig_7dpi0043325	0.00727878	PACN1_DANRE Protein kinase C and casein kinase substrate in neurons protein 1 OS=Danio rerio OX=7955 GN=pacsin1b PE=1 SV=1
contig_7dpi0085276	0.786243	AUP1_DANRE Ancient ubiquitous protein 1 OS=Danio rerio OX=7955 GN=aup1 PE=2 SV=2
contig_7dpi0025746	0.000394753	OTOF_DANRE Otoferlin OS=Danio rerio OX=7955 GN=otof PE=3 SV=1
contig_7dpi0058330	2.83259	ERGI3_DANRE Endoplasmic reticulum-Golgi intermediate compartment protein 3 OS=Danio rerio OX=7955 GN=ergic3 PE=2 SV=1
contig_7dpi0051780	1.82175e-09	DRL_DANRE Zinc finger protein draculin OS=Danio rerio OX=7955 GN=drl PE=2 SV=2
contig_7dpi0048576	2.27923	VP26A_DANRE Vacuolar protein sorting-associated protein 26A OS=Danio rerio OX=7955 GN=vps26a PE=1 SV=1
contig_7dpi0167355	0.484418	HXDCA_DANRE Homeobox protein Hox-D12a OS=Danio rerio OX=7955 GN=hoxd12a PE=2 SV=2
contig_7dpi0000825	3.80527e-14	SIAT2_DANRE Beta-galactoside alpha-2,6-sialyltransferase 2 OS=Danio rerio OX=7955 GN=st6gal2 PE=2 SV=1
contig_7dpi0013636	0.275904	FBLN1_DANRE Fibulin-1 OS=Danio rerio OX=7955 GN=fbln1 PE=2 SV=1
contig_7dpi0067478	3.89856	PNCB_DANRE Nicotinate phosphoribosyltransferase OS=Danio rerio OX=7955 GN=naprt PE=2 SV=2
contig_7dpi0022055	0.227827	UXS1_DANRE UDP-glucuronic acid decarboxylase 1 OS=Danio rerio OX=7955 GN=uxs1 PE=2 SV=2
contig_7dpi0067119	1.62449	AL4A1_DANRE Delta-1-pyrroline-5-carboxylate dehydrogenase, mitochondrial OS=Danio rerio OX=7955 GN=aldh4a1 PE=2 SV=1
contig_7dpi0005674	1.39945	STIL_DANRE SCL-interrupting locus protein homolog OS=Danio rerio OX=7955 GN=stil PE=1 SV=2
contig_7dpi0068400	2.08512	H6S1B_DANRE Heparan-sulfate 6-O-sulfotransferase 1-B OS=Danio rerio OX=7955 GN=hs6st1b PE=2 SV=3
contig_7dpi0025249	2.65851	G6PT3_DANRE Glucose-6-phosphate exchanger SLC37A2 OS=Danio rerio OX=7955 GN=slc37a2 PE=2 SV=1
contig_7dpi0024645	9.01907e-22	NLRC5_ICTPU Protein NLRC5 OS=Ictalurus punctatus OX=7998 GN=nlrc5 PE=2 SV=1
contig_7dpi0018585	9.80449e-12	KAT2B_DANRE Histone acetyltransferase KAT2B OS=Danio rerio OX=7955 GN=kat2b PE=2 SV=1
contig_7dpi0034052	3.87988	TYRO3_DANRE Tyrosine-protein kinase receptor TYRO3 OS=Danio rerio OX=7955 GN=tyro3 PE=2 SV=1
contig_7dpi0032012	5.55834e-05	NPHP3_DANRE Nephrocystin-3 OS=Danio rerio OX=7955 GN=nphp3 PE=3 SV=1
contig_7dpi0193167	1.68421	THS7A_DANRE Thrombospondin type-1 domain-containing protein 7A OS=Danio rerio OX=7955 GN=thsd7aa PE=1 SV=2
contig_7dpi0013209	2.03079e-98	GRK7A_DANRE Rhodopsin kinase grk7a OS=Danio rerio OX=7955 GN=grk7a PE=1 SV=2
contig_7dpi0021307	3.91789e-16	AACS_DANRE Acetoacetyl-CoA synthetase OS=Danio rerio OX=7955 GN=aacs PE=2 SV=1
contig_7dpi0006722	1.09247e-36	SAE2_DANRE SUMO-activating enzyme subunit 2 OS=Danio rerio OX=7955 GN=uba2 PE=1 SV=2
contig_7dpi0013924	0.80409	T120B_DANRE Transmembrane protein 120B OS=Danio rerio OX=7955 GN=tmem120b PE=2 SV=1
contig_7dpi0327973	1.26376	TP8L2_SALSA Tumor necrosis factor alpha-induced protein 8-like protein 2 OS=Salmo salar OX=8030 GN=tnfaip8l2 PE=2 SV=1
contig_7dpi0134252		not available
contig_7dpi0041159	8.14676e-40	HYOU1_DANRE Hypoxia up-regulated protein 1 OS=Danio rerio OX=7955 GN=hyou1 PE=2 SV=1
contig_7dpi0013015	3.24574e-07	RABEK_DANRE Rab9 effector protein with kelch motifs OS=Danio rerio OX=7955 GN=rabepk PE=2 SV=1
contig_7dpi0057735	2.31443	NMT2_DANRE Glycylpeptide N-tetradecanoyltransferase 2 OS=Danio rerio OX=7955 GN=nmt2 PE=2 SV=2
contig_7dpi0025638	0.155123	AMOL2_DANRE Angiomotin-like 2a OS=Danio rerio OX=7955 GN=amotl2a PE=1 SV=2
contig_7dpi0049903	0.263046	JADE3_DANRE Protein Jade-3 OS=Danio rerio OX=7955 GN=jade3 PE=2 SV=1
contig_7dpi0080985	4.43656e-15	AT2A1_MAKNI Sarcoplasmic/endoplasmic reticulum calcium ATPase 1 OS=Makaira nigricans OX=13604 GN=atp2a1 PE=2 SV=2
contig_7dpi0067812	3.35967	UBP12_DANRE Ubiquitin carboxyl-terminal hydrolase 12A OS=Danio rerio OX=7955 GN=usp12a PE=2 SV=1
contig_7dpi0043928	5.59867e-09	SMUF2_DANRE E3 ubiquitin-protein ligase SMURF2 OS=Danio rerio OX=7955 GN=smurf2 PE=2 SV=1
contig_7dpi0029420	0.511134	UBR3_DANRE E3 ubiquitin-protein ligase ubr3 OS=Danio rerio OX=7955 GN=ubr3 PE=2 SV=2
contig_7dpi0028665	1.98716	TRADD_DANRE Tumor necrosis factor receptor type 1-associated DEATH domain protein OS=Danio rerio OX=7955 GN=tradd PE=2 SV=1
contig_7dpi0045661	2.08394e-09	CSF12_TAKRU Macrophage colony-stimulating factor 1 receptor 2 OS=Takifugu rubripes OX=31033 GN=csf1r2 PE=3 SV=1
contig_7dpi0010352	6.71217	EURL_DANRE Protein EURL homolog OS=Danio rerio OX=7955 GN=eurl PE=2 SV=1
contig_7dpi0062565	7.28146	NBEL2_DANRE Neurobeachin-like protein 2 OS=Danio rerio OX=7955 GN=nbeal2 PE=1 SV=1
contig_7dpi0063929	0.808106	FLTOP_DANRE Protein Flattop OS=Danio rerio OX=7955 GN=cfap126 PE=2 SV=1
contig_7dpi0272528	1.66631	RCOR2_DANRE REST corepressor 2 OS=Danio rerio OX=7955 GN=rcor2 PE=2 SV=1
contig_7dpi0079796	9.67867e-08	ATP9B_DANRE Probable phospholipid-transporting ATPase IIB OS=Danio rerio OX=7955 GN=atp9b PE=3 SV=1
contig_7dpi0002496	1.71262e-66	MY9AA_DANRE Unconventional myosin-IXAa OS=Danio rerio OX=7955 GN=myo9aa PE=3 SV=1
contig_7dpi0069625	0.000262425	S20AB_DANRE Sodium-dependent phosphate transporter 1-B OS=Danio rerio OX=7955 GN=slc20a1b PE=2 SV=1
contig_7dpi0012453	0.967094	NSMF_DANRE NMDA receptor synaptonuclear signaling and neuronal migration factor OS=Danio rerio OX=7955 GN=nsmf PE=2 SV=1
contig_7dpi0026470	2.04007	EIPR1_DANRE EARP-interacting protein homolog OS=Danio rerio OX=7955 GN=eipr1 PE=2 SV=1
contig_7dpi0081221	0.765586	GL8D1_DANRE Glycosyltransferase 8 domain-containing protein 1 OS=Danio rerio OX=7955 GN=glt8d1 PE=2 SV=1
contig_7dpi0050267	8.5515e-09	SE1BA_DANRE Histone-lysine N-methyltransferase SETD1B-A OS=Danio rerio OX=7955 GN=setd1ba PE=1 SV=2
contig_7dpi0068658		not available
contig_7dpi0046961	1.13466	CCNB2_ORYCU G2/mitotic-specific cyclin-B2 OS=Oryzias curvinotus OX=104658 GN=ccnb2 PE=2 SV=1
contig_7dpi0071609	0.494252	IER5L_DANRE Immediate early response gene 5-like protein OS=Danio rerio OX=7955 GN=ier5l PE=2 SV=2
contig_7dpi0013584	1.34792	EYS_DANRE Protein eyes shut homolog OS=Danio rerio OX=7955 GN=eys PE=1 SV=2
contig_7dpi0028453	3.59785	KITA_DANRE Mast/stem cell growth factor receptor kita OS=Danio rerio OX=7955 GN=kita PE=2 SV=2
contig_7dpi0013960	0.224688	DEFI6_DANRE Differentially expressed in FDCP 6 homolog OS=Danio rerio OX=7955 GN=def6 PE=2 SV=1
contig_7dpi0003205	6.01426	ANKS6_DANRE Ankyrin repeat and SAM domain-containing protein 6 OS=Danio rerio OX=7955 GN=anks6 PE=2 SV=1
contig_7dpi0237656	2.04708	PK1IP_DANRE p21-activated protein kinase-interacting protein 1-like OS=Danio rerio OX=7955 GN=pak1ip1 PE=2 SV=1
contig_7dpi0041407	2.67135e-111	CCND1_DANRE G1/S-specific cyclin-D1 OS=Danio rerio OX=7955 GN=ccnd1 PE=2 SV=1
contig_7dpi0029075	1.0027e-05	SV91A_DANRE Histone-lysine N-methyltransferase SUV39H1-A OS=Danio rerio OX=7955 GN=suv39h1a PE=2 SV=2
contig_7dpi0027069	0.402602	OSGP2_DANRE Probable tRNA N6-adenosine threonylcarbamoyltransferase, mitochondrial OS=Danio rerio OX=7955 GN=osgepl1 PE=2 SV=2
contig_7dpi0025878	5.24434e-15	CDHR1_DANRE Cadherin-related family member 1 OS=Danio rerio OX=7955 GN=cdhr1 PE=2 SV=1
contig_7dpi0110359	0.550169	R213A_DANRE E3 ubiquitin-protein ligase rnf213-alpha OS=Danio rerio OX=7955 GN=rnf213a PE=3 SV=1
contig_7dpi0098056	0.229483	SC4AB_DANRE Sodium channel protein type 4 subunit alpha B OS=Danio rerio OX=7955 GN=scn4ab PE=2 SV=1
contig_7dpi0056317	1.1939	M4GDB_DANRE MIF4G domain-containing protein B OS=Danio rerio OX=7955 GN=mif4gdb PE=1 SV=1
contig_7dpi0020294	0.88516	TSH1_DANRE Teashirt homolog 1 OS=Danio rerio OX=7955 GN=tshz1 PE=2 SV=1
contig_7dpi0054369	4.53644	C19L2_DANRE CWF19-like protein 2 OS=Danio rerio OX=7955 GN=cwf19l2 PE=2 SV=1
contig_7dpi0001930	7.05722e-38	STXB_SYNHO Stonustoxin subunit beta OS=Synanceia horrida OX=13279 PE=1 SV=3
contig_7dpi0008355	3.29919	STK3_DANRE Serine/threonine-protein kinase 3 OS=Danio rerio OX=7955 GN=stk3 PE=2 SV=1
contig_7dpi0035560	4.07703e-82	HIF1A_ONCMY Hypoxia-inducible factor 1-alpha OS=Oncorhynchus mykiss OX=8022 GN=hif1a PE=2 SV=1
contig_7dpi0112101	1.67554	RXLT1_DANRE Ribitol-5-phosphate xylosyltransferase 1 OS=Danio rerio OX=7955 GN=rxylt1 PE=2 SV=2
contig_7dpi0051521	3.97601e-09	RELCH_DANRE RAB11-binding protein RELCH homolog OS=Danio rerio OX=7955 GN=relch PE=2 SV=1
contig_7dpi0054639	6.53749e-47	BRD9_DANRE Bromodomain-containing protein 9 OS=Danio rerio OX=7955 GN=brd9 PE=2 SV=1
contig_7dpi0059189	8.43114e-124	CRCM1_DANRE Calcium release-activated calcium channel protein 1 OS=Danio rerio OX=7955 GN=orai1 PE=2 SV=2
contig_7dpi0104945	0.00324074	LDHD_DANRE Probable D-lactate dehydrogenase, mitochondrial OS=Danio rerio OX=7955 GN=ldhd PE=2 SV=1
contig_7dpi0047473	0.482748	EPG5_DANRE Ectopic P granules protein 5 homolog OS=Danio rerio OX=7955 GN=epg5 PE=3 SV=1
contig_7dpi0032802	1.47612	OLF3A_DANRE Olfactomedin-like protein 3A OS=Danio rerio OX=7955 GN=olfml3a PE=2 SV=2
contig_7dpi0013207	4.40769	SCOCA_DANRE Short coiled-coil protein A OS=Danio rerio OX=7955 GN=scoca PE=3 SV=1
contig_7dpi0099546	1.3411	IKBP1_DANRE Interleukin-1 receptor-associated kinase 1-binding protein 1 homolog OS=Danio rerio OX=7955 GN=irak1bp1 PE=2 SV=1
contig_7dpi0040812	2.18911e-118	CIP4_DANRE Cdc42-interacting protein 4 homolog OS=Danio rerio OX=7955 GN=trip10 PE=2 SV=1
contig_7dpi0011833	1.05698e-10	DNMBP_DANRE Dynamin-binding protein OS=Danio rerio OX=7955 GN=dnmbp PE=2 SV=1
contig_7dpi0115509	0.79578	GTR12_DANRE Solute carrier family 2, facilitated glucose transporter member 12 OS=Danio rerio OX=7955 GN=slc2a12 PE=2 SV=2
contig_7dpi0003808	3.98808	PTPRC_CYPCA Receptor-type tyrosine-protein phosphatase C OS=Cyprinus carpio OX=7962 GN=ptprc PE=2 SV=1
contig_7dpi0093422	3.77416	MTX3_DANRE Metaxin-3 OS=Danio rerio OX=7955 GN=mtx3 PE=2 SV=2
contig_7dpi0030335	1.89407	NIP7_TETNG 60S ribosome subunit biogenesis protein NIP7 homolog OS=Tetraodon nigroviridis OX=99883 GN=nip7 PE=3 SV=1
contig_7dpi0144843	1.29907	MEI4_DANRE Meiosis-specific protein MEI4 OS=Danio rerio OX=7955 GN=mei4 PE=2 SV=1
contig_7dpi0271044	6.98662	GPT3L_DANRE Glycerol-3-phosphate acyltransferase 3-like OS=Danio rerio OX=7955 GN=agpat9l PE=3 SV=1
contig_7dpi0030992		not available
contig_7dpi0080046	2.40834e-133	KEP1B_DANRE Kelch-like ECH-associated protein 1B OS=Danio rerio OX=7955 GN=keap1b PE=1 SV=1
contig_7dpi0047482	1.56215	GPR22_DANRE G-protein coupled receptor 22 OS=Danio rerio OX=7955 GN=gpr22a PE=2 SV=1
contig_7dpi0058580	1.19852	LRRC3_DANRE Leucine-rich repeat-containing protein 3 OS=Danio rerio OX=7955 GN=lrrc3 PE=2 SV=1
contig_7dpi0028344	8.11366	R213B_DANRE E3 ubiquitin-protein ligase rnf213-beta OS=Danio rerio OX=7955 GN=rnf213b PE=3 SV=1
contig_7dpi0047752	6.06659	UBAD2_DANRE UBA-like domain-containing protein 2 OS=Danio rerio OX=7955 GN=ubald2 PE=2 SV=1
contig_7dpi0007708	0.0074433	LAMB4_DANRE Laminin subunit beta-4 OS=Danio rerio OX=7955 GN=lamb4 PE=2 SV=1
contig_7dpi0014571	0.0654476	NFIL3_DANRE Nuclear factor interleukin-3-regulated protein OS=Danio rerio OX=7955 GN=nfil3 PE=2 SV=1
contig_7dpi0080735	2.31449	NUP93_DANRE Nuclear pore complex protein Nup93 OS=Danio rerio OX=7955 GN=dye PE=2 SV=1
contig_7dpi0169987	0.138485	TTK_DANRE Dual specificity protein kinase Ttk OS=Danio rerio OX=7955 GN=ttk PE=1 SV=2
contig_7dpi0157381	1.24708	AGRV1_DANRE Adhesion G-protein coupled receptor V1 OS=Danio rerio OX=7955 GN=adgrv1 PE=2 SV=1
contig_7dpi0082192	4.49859	KPCI_DANRE Protein kinase C iota type OS=Danio rerio OX=7955 GN=prkci PE=2 SV=2
contig_7dpi0001629	1.46329e-19	SMUF2_DANRE E3 ubiquitin-protein ligase SMURF2 OS=Danio rerio OX=7955 GN=smurf2 PE=2 SV=1
contig_7dpi0047739	0.78046	ADAT3_DANRE Probable inactive tRNA-specific adenosine deaminase-like protein 3 OS=Danio rerio OX=7955 GN=adat3 PE=2 SV=2
contig_7dpi0000664	2.86815e-38	MT12B_DANRE Monocarboxylate transporter 12-B OS=Danio rerio OX=7955 GN=slc16a12b PE=2 SV=1
contig_7dpi0000465		not available
contig_7dpi0001873	6.26681	CMAH_DANRE Cytidine monophosphate-N-acetylneuraminic acid hydroxylase OS=Danio rerio OX=7955 GN=cmah PE=2 SV=1
contig_7dpi0016085	2.37205	RFX6_DANRE DNA-binding protein RFX6 OS=Danio rerio OX=7955 GN=rfx6 PE=2 SV=2
contig_7dpi0126748	0.445343	TT30A_DANRE Tetratricopeptide repeat protein 30A OS=Danio rerio OX=7955 GN=ttc30a PE=2 SV=2
contig_7dpi0018053	1.51132	MKRN2_TAKRU Probable E3 ubiquitin-protein ligase makorin-2 OS=Takifugu rubripes OX=31033 GN=mkrn2 PE=2 SV=1
contig_7dpi0054736	2.35962	CYB_ANGMA Cytochrome b OS=Anguilla marmorata OX=7939 GN=mt-cyb PE=3 SV=1
contig_7dpi0060805	0.487577	UVSSA_DANRE UV-stimulated scaffold protein A OS=Danio rerio OX=7955 GN=uvssa PE=2 SV=2
contig_7dpi0114426	0.73818	THOC5_DANRE THO complex subunit 5 homolog OS=Danio rerio OX=7955 GN=thoc5 PE=2 SV=1
contig_7dpi0023849	4.35491	HXCDA_TAKRU Homeobox protein Hox-C13a OS=Takifugu rubripes OX=31033 GN=hoxc13a PE=3 SV=1
contig_7dpi0108965	2.55768	ZNRF3_DANRE E3 ubiquitin-protein ligase znrf3 OS=Danio rerio OX=7955 GN=znrf3 PE=1 SV=2
contig_7dpi0053993	2.37008	APEL_DANRE Apelin OS=Danio rerio OX=7955 GN=apln PE=1 SV=2
contig_7dpi0036922	4.2133e-11	DNMBP_DANRE Dynamin-binding protein OS=Danio rerio OX=7955 GN=dnmbp PE=2 SV=1
contig_7dpi0043562	4.39369e-08	KC2D1_DANRE Calcium/calmodulin-dependent protein kinase type II delta 1 chain OS=Danio rerio OX=7955 GN=camk2d1 PE=2 SV=2
contig_7dpi0017184	1.25063e-27	VDRB_DANRE Vitamin D3 receptor B OS=Danio rerio OX=7955 GN=vdrb PE=2 SV=2
contig_7dpi0061189	6.85606e-38	SP9_DANRE Transcription factor Sp9 OS=Danio rerio OX=7955 GN=sp9 PE=2 SV=1
contig_7dpi0065931	7.79746e-41	RAB4B_DANRE Ras-related protein Rab-4B OS=Danio rerio OX=7955 GN=rab4b PE=2 SV=1
contig_7dpi0110488	6.61285	DAZL_DANRE Deleted in azoospermia-like OS=Danio rerio OX=7955 GN=dazl PE=1 SV=1
contig_7dpi0030800	1.76752e-11	XPO2_DANRE Exportin-2 OS=Danio rerio OX=7955 GN=cse1l PE=1 SV=2
contig_7dpi0242249	5.34822	FBX5_DANRE F-box only protein 5 OS=Danio rerio OX=7955 GN=fbxo5 PE=1 SV=2
contig_7dpi0010621	0	R213A_DANRE E3 ubiquitin-protein ligase rnf213-alpha OS=Danio rerio OX=7955 GN=rnf213a PE=3 SV=1
contig_7dpi0014873	0.655567	TMC2A_DANRE Transmembrane channel-like protein 2-A OS=Danio rerio OX=7955 GN=tmc2a PE=1 SV=2
contig_7dpi0018994	5.67891e-10	IBP2A_DANRE Insulin-like growth factor-binding protein 2-A OS=Danio rerio OX=7955 GN=igfbp2a PE=1 SV=1
contig_7dpi0021309	0.30538	AMER2_DANRE APC membrane recruitment protein 2 OS=Danio rerio OX=7955 GN=amer2 PE=2 SV=1
contig_7dpi0013025	7.6333e-26	PRDM9_DANRE Histone-lysine N-methyltransferase PRDM9 OS=Danio rerio OX=7955 GN=prdm9 PE=2 SV=1
contig_7dpi0175667	0.564887	RSAD1_DANRE Radical S-adenosyl methionine domain-containing protein 1, mitochondrial OS=Danio rerio OX=7955 GN=rsad1 PE=2 SV=1
contig_7dpi0251978	0.321804	HACD3_DANRE Very-long-chain (3R)-3-hydroxyacyl-CoA dehydratase OS=Danio rerio OX=7955 GN=hacd3 PE=2 SV=2
contig_7dpi0017773	0.0134549	ZMAT5_DANRE Zinc finger matrin-type protein 5 OS=Danio rerio OX=7955 GN=zmat5 PE=2 SV=1
contig_7dpi0110088	4.3818	KPCI_DANRE Protein kinase C iota type OS=Danio rerio OX=7955 GN=prkci PE=2 SV=2
contig_7dpi0041784	2.18718	XKR8_GASAC XK-related protein 8 OS=Gasterosteus aculeatus OX=69293 GN=xkr8 PE=2 SV=1
contig_7dpi0056351	0.47	SCG3_DANRE Secretogranin-3 OS=Danio rerio OX=7955 GN=scg3 PE=2 SV=1
contig_7dpi0004886	2.01239	CYT_ONCMY Cystatin OS=Oncorhynchus mykiss OX=8022 PE=2 SV=1
contig_7dpi0068816	6.13276e-07	SCAR5_DANRE Scavenger receptor class A member 5 OS=Danio rerio OX=7955 GN=scara5 PE=3 SV=1
contig_7dpi0028516	9.23745e-19	ZN16L_DANRE Zinc finger protein 16-like OS=Danio rerio OX=7955 GN=znf16l PE=1 SV=1
contig_7dpi0072286	0.247019	SCMC1_DANRE Calcium-binding mitochondrial carrier protein SCaMC-1 OS=Danio rerio OX=7955 GN=slc25a24 PE=2 SV=1
contig_7dpi0011210	0	S40A1_DANRE Solute carrier family 40 member 1 OS=Danio rerio OX=7955 GN=slc40a1 PE=2 SV=2
contig_7dpi0018243	8.0133e-84	WIPI3_DANRE WD repeat domain phosphoinositide-interacting protein 3 OS=Danio rerio OX=7955 GN=wdr45b PE=2 SV=1
contig_7dpi0010464	3.40508	TONSL_DANRE Tonsoku-like protein OS=Danio rerio OX=7955 GN=tonsl PE=2 SV=1
contig_7dpi0045447	8.75641e-05	CR3LB_DANRE Cyclic AMP-responsive element-binding protein 3-like protein 3-B OS=Danio rerio OX=7955 GN=creb3l3b PE=3 SV=2
contig_7dpi0029053	4.90544e-16	ZDH15_DANRE Palmitoyltransferase ZDHHC15B OS=Danio rerio OX=7955 GN=zdhhc15b PE=1 SV=1
contig_7dpi0045672	0.0407735	KRIT1_DANRE Krev interaction trapped protein 1 OS=Danio rerio OX=7955 GN=krit1 PE=1 SV=1
contig_7dpi0039830	1.63497	FBXL5_SALSA F-box/LRR-repeat protein 5 OS=Salmo salar OX=8030 GN=fbxl5 PE=2 SV=1
contig_7dpi0022471	2.2351e-59	GARL3_DANRE GTPase-activating Rap/Ran-GAP domain-like protein 3 OS=Danio rerio OX=7955 GN=garnl3 PE=3 SV=1
contig_7dpi0013048	6.62488e-87	KPCB_DANRE Protein kinase C beta type OS=Danio rerio OX=7955 GN=prkcbb PE=2 SV=1
contig_7dpi0063320	0.295838	APMAP_DANRE Adipocyte plasma membrane-associated protein OS=Danio rerio OX=7955 GN=apmap PE=2 SV=1
contig_7dpi0025936	2.23251e-97	EGLN_DANRE Endoglin OS=Danio rerio OX=7955 GN=eng PE=2 SV=1
contig_7dpi0175367	1.0102	HXADB_TAKRU Homeobox protein Hox-A13b OS=Takifugu rubripes OX=31033 GN=hoxa13b PE=3 SV=1
contig_7dpi0016759	1.14019	LAMB4_DANRE Laminin subunit beta-4 OS=Danio rerio OX=7955 GN=lamb4 PE=2 SV=1
contig_7dpi0026435	3.21451e-116	Z687B_DANRE Zinc finger protein 687b OS=Danio rerio OX=7955 GN=znf687b PE=2 SV=1
contig_7dpi0022919	1.17786	UN93A_DANRE Protein unc-93 homolog A OS=Danio rerio OX=7955 GN=unc93a PE=3 SV=1
contig_7dpi0025195	7.86242e-54	VA0D1_DANRE V-type proton ATPase subunit d 1 OS=Danio rerio OX=7955 GN=atp6v0d1 PE=1 SV=1
contig_7dpi0020953	4.72168	STPAP_DANRE Speckle targeted PIP5K1A-regulated poly(A) polymerase OS=Danio rerio OX=7955 GN=tut1 PE=2 SV=1
contig_7dpi0004946	1.65031	CTL5A_DANRE Choline transporter-like protein 5-A (Fragment) OS=Danio rerio OX=7955 GN=slc44a5a PE=3 SV=1
contig_7dpi0026114	1.45314	D2HDH_DANRE D-2-hydroxyglutarate dehydrogenase, mitochondrial OS=Danio rerio OX=7955 GN=d2hgdh PE=2 SV=1
contig_7dpi0025710	3.83055e-09	PDCL3_DANRE Phosducin-like protein 3 OS=Danio rerio OX=7955 GN=pdcl3 PE=2 SV=1
contig_7dpi0148586	0.588071	RAB7_EPICO Ras-related protein rab7 OS=Epinephelus coioides OX=94232 GN=rab7 PE=1 SV=1
contig_7dpi0043872	2.24942	EXO5_DANRE Exonuclease V OS=Danio rerio OX=7955 GN=exo5 PE=3 SV=1
contig_7dpi0073969		not available
contig_7dpi0013615	0.551354	RELCH_DANRE RAB11-binding protein RELCH homolog OS=Danio rerio OX=7955 GN=relch PE=2 SV=1
contig_7dpi0026244	0.347132	CP11A_ONCMY Cholesterol side-chain cleavage enzyme, mitochondrial OS=Oncorhynchus mykiss OX=8022 GN=cyp11a1 PE=2 SV=1
contig_7dpi0004379	8.38956e-27	KPSH1_DANRE Serine/threonine-protein kinase H1 homolog OS=Danio rerio OX=7955 GN=pskh1 PE=2 SV=2
contig_7dpi0016768	6.73858e-12	NLRC5_ICTPU Protein NLRC5 OS=Ictalurus punctatus OX=7998 GN=nlrc5 PE=2 SV=1
contig_7dpi0063290		not available
contig_7dpi0098602	0.509141	OBRG_TAKRU Leptin receptor gene-related protein OS=Takifugu rubripes OX=31033 GN=leprot PE=2 SV=1
contig_7dpi0021271	0.487514	PCX4_DANRE Pecanex-like protein 4 OS=Danio rerio OX=7955 GN=pcnx4 PE=2 SV=1
contig_7dpi0043701	1.42416e-07	NAA50_DANRE N-alpha-acetyltransferase 50 OS=Danio rerio OX=7955 GN=naa50 PE=1 SV=1
contig_7dpi0009649	3.90119e-64	GRK7B_DANRE Rhodopsin kinase grk7-b OS=Danio rerio OX=7955 GN=grk7b PE=1 SV=2
contig_7dpi0025649	3.11958	MBNL3_TAKRU Muscleblind-like protein 3 OS=Takifugu rubripes OX=31033 GN=mbnl3 PE=2 SV=1
contig_7dpi0061168	4.40815	GDAP2_DANRE Ganglioside-induced differentiation-associated protein 2 OS=Danio rerio OX=7955 GN=gdap2 PE=2 SV=1
contig_7dpi0003856	0.00022401	ABCB8_DANRE ATP-binding cassette sub-family B member 8, mitochondrial OS=Danio rerio OX=7955 GN=abcb8 PE=2 SV=1
contig_7dpi0176896	0.783932	DI2BA_DANRE Disco-interacting protein 2 homolog B-A OS=Danio rerio OX=7955 GN=dip2ba PE=2 SV=1
contig_7dpi0064757	1.17559e-145	B3AT_ONCMY Band 3 anion exchange protein OS=Oncorhynchus mykiss OX=8022 GN=slc4a1 PE=2 SV=2
contig_7dpi0057763	0	KC1G1_DANRE Casein kinase I isoform gamma-1 OS=Danio rerio OX=7955 GN=csnk1g1 PE=2 SV=1
contig_7dpi0027935	0.264388	RN146_SALSA E3 ubiquitin-protein ligase rnf146 OS=Salmo salar OX=8030 GN=rnf146 PE=2 SV=1
contig_7dpi0070657	1.15289e-45	ENASE_DANRE Cytosolic endo-beta-N-acetylglucosaminidase OS=Danio rerio OX=7955 GN=engase PE=2 SV=1
contig_7dpi0032964	0.776003	STPG2_DANRE Sperm-tail PG-rich repeat-containing protein 2 OS=Danio rerio OX=7955 GN=stpg2 PE=2 SV=1
contig_7dpi0030999	3.1422	NPY_GADMO Neuropeptide Y OS=Gadus morhua OX=8049 GN=npy PE=1 SV=1
contig_7dpi0012701	5.22776	SSUH2_DANRE Protein SSUH2 homolog OS=Danio rerio OX=7955 GN=ssuh2 PE=2 SV=2
contig_7dpi0038233	0.707428	MK12_DANRE Mitogen-activated protein kinase 12 OS=Danio rerio OX=7955 GN=mapk12 PE=2 SV=1
contig_7dpi0037984	7.81056	CB076_DANRE UPF0538 protein C2orf76 homolog OS=Danio rerio OX=7955 GN=zgc:101851 PE=2 SV=1
contig_7dpi0106103	8.04494	SXT1_TAKPA Saxitoxin and tetrodotoxin-binding protein 1 OS=Takifugu pardalis OX=98921 GN=psbp1 PE=1 SV=2
contig_7dpi0028578	3.84709e-19	PABPA_DANRE Polyadenylate-binding protein 1A OS=Danio rerio OX=7955 GN=pabpc1a PE=1 SV=1
contig_7dpi0039347		not available
contig_7dpi0074478	7.42571	PR3CB_DANRE Protein phosphatase 1 regulatory subunit 3C-B OS=Danio rerio OX=7955 GN=ppp1r3cb PE=2 SV=1
contig_7dpi0102875	1.16635	OPA1_DANRE Dynamin-like 120 kDa protein, mitochondrial OS=Danio rerio OX=7955 GN=opa1 PE=2 SV=1
contig_7dpi0007669	2.5054	OPN4A_DANRE Melanopsin-A OS=Danio rerio OX=7955 GN=opn4a PE=2 SV=3
contig_7dpi0004526		not available
contig_7dpi0061298	0.155549	MYPT1_DANRE Protein phosphatase 1 regulatory subunit 12A OS=Danio rerio OX=7955 GN=ppp1r12a PE=2 SV=2
contig_7dpi0078625	1.74398	UBP20_DANRE Ubiquitin carboxyl-terminal hydrolase 20 OS=Danio rerio OX=7955 GN=usp20 PE=3 SV=1
contig_7dpi0045372	3.20782	WASC3_SALSA WASH complex subunit 3 OS=Salmo salar OX=8030 GN=washc3 PE=2 SV=1
contig_7dpi0072718	1.19957	AGRG6_DANRE Adhesion G-protein coupled receptor G6 OS=Danio rerio OX=7955 GN=adgrg6 PE=1 SV=1
contig_7dpi0014425	0.175918	A4_TETFL Amyloid-beta A4 protein OS=Tetraodon fluviatilis OX=47145 GN=app PE=2 SV=1
contig_7dpi0027352	2.09628	CR3L2_DANRE Cyclic AMP-responsive element-binding protein 3-like protein 2 OS=Danio rerio OX=7955 GN=creb3l2 PE=2 SV=1
contig_7dpi0051826	0.830759	ANR52_DANRE Serine/threonine-protein phosphatase 6 regulatory ankyrin repeat subunit C OS=Danio rerio OX=7955 GN=ankrd52 PE=2 SV=1
contig_7dpi0044196	0.087305	SKAP1_TAKRU Src kinase-associated phosphoprotein 1 OS=Takifugu rubripes OX=31033 GN=skap1 PE=3 SV=1
contig_7dpi0048209	1.11747	YLAT2_DANRE Y+L amino acid transporter 2 OS=Danio rerio OX=7955 GN=slc7a6 PE=2 SV=1
contig_7dpi0048685	0.32478	GLMP_SALSA Glycosylated lysosomal membrane protein OS=Salmo salar OX=8030 GN=glmp PE=2 SV=1
contig_7dpi0040135	2.47186	SMRDB_DANRE SWI/SNF-related matrix-associated actin-dependent regulator of chromatin subfamily A containing DEAD/H box 1B OS=Danio rerio OX=7955 GN=smarcad1b PE=3 SV=1
contig_7dpi0004671		not available
contig_7dpi0031403	2.02396	NARPA_DANRE Notch-regulated ankyrin repeat-containing protein A OS=Danio rerio OX=7955 GN=nrarpa PE=2 SV=1
contig_7dpi0012739	0.239668	TPP1_DANRE Tripeptidyl-peptidase 1 OS=Danio rerio OX=7955 GN=tpp1 PE=1 SV=2
contig_7dpi0041811	0.000112924	CRA1B_DANRE Collagen alpha-1(XXVII) chain B OS=Danio rerio OX=7955 GN=col27a1b PE=2 SV=1
contig_7dpi0096299	1.56149	NGLY1_DANRE Peptide-N(4)-(N-acetyl-beta-glucosaminyl)asparagine amidase OS=Danio rerio OX=7955 GN=ngly1 PE=2 SV=1
contig_7dpi0082995	3.79063e-145	ABD12_DANRE Lysophosphatidylserine lipase ABHD12 OS=Danio rerio OX=7955 GN=abhd12 PE=2 SV=1
contig_7dpi0037911	4.26379e-12	CDK2_CARAU Cyclin-dependent kinase 2 OS=Carassius auratus OX=7957 GN=cdk2 PE=1 SV=1
contig_7dpi0025906	2.67921	UBP12_SALSA Ubiquitin carboxyl-terminal hydrolase 12 OS=Salmo salar OX=8030 GN=usp12 PE=2 SV=1
contig_7dpi0087380	4.05348e-08	ZBT24_DANRE Zinc finger and BTB domain-containing protein 24 OS=Danio rerio OX=7955 GN=zbtb24 PE=2 SV=1
contig_7dpi0007354	0.614934	LMBD1_DANRE Probable lysosomal cobalamin transporter OS=Danio rerio OX=7955 GN=lmbrd1 PE=2 SV=1
contig_7dpi0037654	9.65608e-54	GARL3_DANRE GTPase-activating Rap/Ran-GAP domain-like protein 3 OS=Danio rerio OX=7955 GN=garnl3 PE=3 SV=1
contig_7dpi0109738	0.346283	NIPLA_DANRE Nipped-B-like protein A OS=Danio rerio OX=7955 GN=nipbla PE=2 SV=1
contig_7dpi0029346	6.26055e-23	CYTSA_DANRE Cytospin-A OS=Danio rerio OX=7955 GN=specc1la PE=2 SV=2
contig_7dpi0024205	5.80841	STB1B_DANRE Histone-lysine N-methyltransferase SETDB1-B OS=Danio rerio OX=7955 GN=setdb1b PE=2 SV=2
contig_7dpi0100821	2.27946	RS3A_TETNG 40S ribosomal protein S3a OS=Tetraodon nigroviridis OX=99883 GN=rps3a PE=3 SV=3
contig_7dpi0071431	2.21857	DCNL4_DANRE DCN1-like protein 4 OS=Danio rerio OX=7955 GN=dcun1d4 PE=4 SV=2
contig_7dpi0091659	3.49635e-16	GNAI2_ORYLA Guanine nucleotide-binding protein G(i) subunit alpha-2 OS=Oryzias latipes OX=8090 GN=gnai2 PE=2 SV=3
contig_7dpi0012839	6.05773	SUV3_DANRE ATP-dependent RNA helicase SUPV3L1, mitochondrial OS=Danio rerio OX=7955 GN=supv3l1 PE=2 SV=1
contig_7dpi0146004	1.32124e-108	DI2BA_DANRE Disco-interacting protein 2 homolog B-A OS=Danio rerio OX=7955 GN=dip2ba PE=2 SV=1
contig_7dpi0002711	1.88555	WDR83_DANRE WD repeat domain-containing protein 83 OS=Danio rerio OX=7955 GN=wdr83 PE=2 SV=1
contig_7dpi0036328	7.38029	CHID1_DANRE Chitinase domain-containing protein 1 OS=Danio rerio OX=7955 GN=chid1 PE=2 SV=1
contig_7dpi0059602	1.57201	RING2_DANRE E3 ubiquitin-protein ligase RING2 OS=Danio rerio OX=7955 GN=rnf2 PE=2 SV=1
contig_7dpi0089143	3.20144e-15	S1PR1_DANRE Sphingosine 1-phosphate receptor 1 OS=Danio rerio OX=7955 GN=s1pr1 PE=2 SV=2
contig_7dpi0038675	3.75717	RNF8_DANRE E3 ubiquitin-protein ligase rnf8 OS=Danio rerio OX=7955 GN=rnf8 PE=2 SV=1
contig_7dpi0212469	6.23274	R7BPA_DANRE Regulator of G-protein signaling 7-binding protein A OS=Danio rerio OX=7955 GN=rgs7bpa PE=2 SV=2
contig_7dpi0149441	0.13163	SH3R1_DANRE E3 ubiquitin-protein ligase SH3RF1 OS=Danio rerio OX=7955 GN=sh3rf1 PE=2 SV=2
contig_7dpi0147682	3.80343e-06	CNTN5_DANRE Contactin-5 OS=Danio rerio OX=7955 GN=cntn5 PE=2 SV=1
contig_7dpi0004608	0.134187	TRPT1_DANRE tRNA 2'-phosphotransferase 1 OS=Danio rerio OX=7955 GN=trpt1 PE=2 SV=2
contig_7dpi0016101	1.74299	CP1A1_ONCMY Cytochrome P450 1A1 OS=Oncorhynchus mykiss OX=8022 GN=cyp1a1 PE=2 SV=2
contig_7dpi0019416	0.156928	HEAT6_DANRE HEAT repeat-containing protein 6 OS=Danio rerio OX=7955 GN=heatr6 PE=2 SV=1
contig_7dpi0012132	6.57521e-129	ATP9B_DANRE Probable phospholipid-transporting ATPase IIB OS=Danio rerio OX=7955 GN=atp9b PE=3 SV=1
contig_7dpi0039346	0.520248	STIL_DANRE SCL-interrupting locus protein homolog OS=Danio rerio OX=7955 GN=stil PE=1 SV=2
contig_7dpi0047119	1.25068	RABL3_DANRE Rab-like protein 3 OS=Danio rerio OX=7955 GN=rabl3 PE=2 SV=1
contig_7dpi0016386	0.946043	RAN_DANRE GTP-binding nuclear protein Ran OS=Danio rerio OX=7955 GN=ran PE=2 SV=1
contig_7dpi0089338	1.55581e-45	SGK1_DANRE Serine/threonine-protein kinase Sgk1 OS=Danio rerio OX=7955 GN=sgk1 PE=2 SV=1
contig_7dpi0006737	1.98233	CBPC1_DANRE Cytosolic carboxypeptidase 1 OS=Danio rerio OX=7955 GN=agtpbp1 PE=2 SV=1
contig_7dpi0018396	1.08674	NEST_DANRE Nestin OS=Danio rerio OX=7955 GN=nes PE=2 SV=1
contig_7dpi0026528	1.64278e-09	CHD8_DANRE Chromodomain-helicase-DNA-binding protein 8 OS=Danio rerio OX=7955 GN=chd8 PE=3 SV=2
contig_7dpi0021544	0.153233	R213A_DANRE E3 ubiquitin-protein ligase rnf213-alpha OS=Danio rerio OX=7955 GN=rnf213a PE=3 SV=1
contig_7dpi0006745	6.20232	T132E_DANRE Transmembrane protein 132E OS=Danio rerio OX=7955 GN=tmem132e PE=2 SV=1
contig_7dpi0032835	3.92703e-47	GRK7B_DANRE Rhodopsin kinase grk7-b OS=Danio rerio OX=7955 GN=grk7b PE=1 SV=2
contig_7dpi0060514	3.95708e-16	PCAT2_DANRE Lysophosphatidylcholine acyltransferase 2 OS=Danio rerio OX=7955 GN=lpcat2 PE=2 SV=1
contig_7dpi0000489	5.70309	S39AE_DANRE Zinc transporter ZIP14 OS=Danio rerio OX=7955 GN=slc39a14 PE=2 SV=1
contig_7dpi0036451	2.16081	ASCC3_DANRE Activating signal cointegrator 1 complex subunit 3 OS=Danio rerio OX=7955 GN=ascc3 PE=3 SV=2
contig_7dpi0252238	0.0939243	TRD7B_DANRE Tudor domain-containing protein 7B OS=Danio rerio OX=7955 GN=tdrd7b PE=3 SV=2
contig_7dpi0004948	2.92369	CHPT1_DANRE Cholinephosphotransferase 1 OS=Danio rerio OX=7955 GN=chpt1 PE=2 SV=1
contig_7dpi0065817	0.515813	HEAT6_DANRE HEAT repeat-containing protein 6 OS=Danio rerio OX=7955 GN=heatr6 PE=2 SV=1
contig_7dpi0004543	5.84325e-148	PKN2_DANRE Serine/threonine-protein kinase N2 OS=Danio rerio OX=7955 GN=pkn2 PE=2 SV=1
contig_7dpi0054578		not available
contig_7dpi0088553	2.72858	GALA_DANRE Galanin peptides OS=Danio rerio OX=7955 GN=gal PE=1 SV=1
contig_7dpi0032129	4.22661e-07	PTPRF_DANRE Receptor-type tyrosine-protein phosphatase F OS=Danio rerio OX=7955 GN=ptprf PE=2 SV=1
contig_7dpi0125155	2.28378	TAM41_DANRE Phosphatidate cytidylyltransferase, mitochondrial OS=Danio rerio OX=7955 GN=tamm41 PE=2 SV=1
contig_7dpi0032523		not available
contig_7dpi0035035	1.13795	PLD3A_DANRE 1-phosphatidylinositol 4,5-bisphosphate phosphodiesterase delta-3-A OS=Danio rerio OX=7955 GN=plcd3a PE=2 SV=1
contig_7dpi0017182	0	AT2A1_MAKNI Sarcoplasmic/endoplasmic reticulum calcium ATPase 1 OS=Makaira nigricans OX=13604 GN=atp2a1 PE=2 SV=2
contig_7dpi0046189	3.33001e-49	GPAT3_DANRE Glycerol-3-phosphate acyltransferase 3 OS=Danio rerio OX=7955 GN=gpat3 PE=2 SV=1
contig_7dpi0009485	5.5997	EPD2_SALSA Ependymin-2 OS=Salmo salar OX=8030 GN=epd2 PE=2 SV=1
contig_7dpi0009349		not available
contig_7dpi0077680	6.71013	ATP6_GADMO ATP synthase subunit a OS=Gadus morhua OX=8049 GN=mt-atp6 PE=3 SV=1
contig_7dpi0103578	0.242994	HXC9A_DANRE Homeobox protein Hox-C9a OS=Danio rerio OX=7955 GN=hoxc9a PE=2 SV=2
contig_7dpi0021624	1.23055e-09	MT12B_DANRE Monocarboxylate transporter 12-B OS=Danio rerio OX=7955 GN=slc16a12b PE=2 SV=1
contig_7dpi0020296	1.25609	F166B_DANRE Protein FAM166B OS=Danio rerio OX=7955 GN=fam166b PE=2 SV=1
contig_7dpi0134466	6.08142e-37	RIPR2_DANRE Rho family-interacting cell polarization regulator 2 OS=Danio rerio OX=7955 GN=ripor2 PE=2 SV=1
contig_7dpi0028846		not available
contig_7dpi0075605	3.29412	MMAC_DANRE Methylmalonic aciduria and homocystinuria type C protein homolog OS=Danio rerio OX=7955 GN=mmachc PE=3 SV=2
contig_7dpi0001717	0.332921	ELAV4_DANRE ELAV-like protein 4 OS=Danio rerio OX=7955 GN=elavl4 PE=1 SV=2
contig_7dpi0005407	1.02142	CO3_ONCMY Complement C3 (Fragment) OS=Oncorhynchus mykiss OX=8022 GN=c3 PE=1 SV=1
contig_7dpi0087637	0.000877517	UBR3_DANRE E3 ubiquitin-protein ligase ubr3 OS=Danio rerio OX=7955 GN=ubr3 PE=2 SV=2
contig_7dpi0004648	0.504771	S5A3A_DANRE Solute carrier family 52, riboflavin transporter, member 3-A OS=Danio rerio OX=7955 GN=slc52a3a PE=2 SV=1
contig_7dpi0086247	2.46893	NPS4A_DANRE Neuronal PAS domain-containing protein 4A OS=Danio rerio OX=7955 GN=npas4a PE=2 SV=1
contig_7dpi0029537	0.000130247	OGFD2_DANRE 2-oxoglutarate and iron-dependent oxygenase domain-containing protein 2 OS=Danio rerio OX=7955 GN=ogfod2 PE=2 SV=1
contig_7dpi0112095	0.240877	CNDH2_DANRE Condensin-2 complex subunit H2 OS=Danio rerio OX=7955 GN=ncaph2 PE=2 SV=1
contig_7dpi0002002	1.86791e-123	RENT1_TAKRU Putative regulator of nonsense transcripts 1 OS=Takifugu rubripes OX=31033 GN=rent1 PE=3 SV=1
contig_7dpi0020759	2.13554	VWA8_DANRE von Willebrand factor A domain-containing protein 8 OS=Danio rerio OX=7955 GN=si:dkey-18l1.1 PE=3 SV=1
contig_7dpi0012939	0.185184	DAAF3_DANRE Dynein assembly factor 3, axonemal OS=Danio rerio OX=7955 GN=dnaaf3 PE=2 SV=2
contig_7dpi0032316	9.14534e-32	KTNA1_SALSA Katanin p60 ATPase-containing subunit A1 OS=Salmo salar OX=8030 GN=katna1 PE=2 SV=1
contig_7dpi0038193	3.36515e-22	ZBT24_DANRE Zinc finger and BTB domain-containing protein 24 OS=Danio rerio OX=7955 GN=zbtb24 PE=2 SV=1
contig_7dpi0062544		not available
contig_7dpi0052370	1.65722	FAN1_DANRE Fanconi-associated nuclease 1 OS=Danio rerio OX=7955 GN=fan1 PE=2 SV=2
contig_7dpi0002968	3.35739	KATL1_DANRE Katanin p60 ATPase-containing subunit A-like 1 OS=Danio rerio OX=7955 GN=katnal1 PE=2 SV=1
contig_7dpi0019929	2.19075e-08	DNMBP_DANRE Dynamin-binding protein OS=Danio rerio OX=7955 GN=dnmbp PE=2 SV=1
contig_7dpi0019783	1.23738	BTD_TAKRU Biotinidase OS=Takifugu rubripes OX=31033 GN=btd PE=3 SV=1
contig_7dpi0067312	2.09189	TRIPC_DANRE E3 ubiquitin-protein ligase TRIP12 OS=Danio rerio OX=7955 GN=trip12 PE=3 SV=1
contig_7dpi0023135	1.64163e-05	FYNB_DANRE Tyrosine-protein kinase fynb OS=Danio rerio OX=7955 GN=fynb PE=2 SV=1
contig_7dpi0071987	0.419832	ECHD3_DANRE Enoyl-CoA hydratase domain-containing protein 3, mitochondrial OS=Danio rerio OX=7955 GN=echdc3 PE=2 SV=2
contig_7dpi0051593	0.222854	NUDC1_DANRE NudC domain-containing protein 1 OS=Danio rerio OX=7955 GN=nudcd1 PE=2 SV=1
contig_7dpi0046747	1.35692e-24	ZN148_DANRE Zinc finger protein 148 OS=Danio rerio OX=7955 GN=znf148 PE=2 SV=2
contig_7dpi0005606	0.000852564	CERT_DANRE Ceramide transfer protein OS=Danio rerio OX=7955 GN=cert PE=1 SV=2
contig_7dpi0151787	6.30962	EAF6_DANRE Chromatin modification-related protein MEAF6 OS=Danio rerio OX=7955 GN=meaf6 PE=2 SV=1
contig_7dpi0025499	0.0716091	MIB1_DANRE E3 ubiquitin-protein ligase mib1 OS=Danio rerio OX=7955 GN=mib1 PE=1 SV=1
contig_7dpi0015502	0.594736	PITX2_DANRE Pituitary homeobox 2 OS=Danio rerio OX=7955 GN=pitx2 PE=2 SV=1
contig_7dpi0047430	8.34517	MTG1_ICTPU Mitochondrial ribosome-associated GTPase 1 OS=Ictalurus punctatus OX=7998 GN=mtg1 PE=2 SV=1
contig_7dpi0057371	0.601263	QTRT2_DANRE Queuine tRNA-ribosyltransferase accessory subunit 2 OS=Danio rerio OX=7955 GN=qtrt2 PE=2 SV=2
contig_7dpi0131500	2.89774e-107	PTSS1_DANRE Phosphatidylserine synthase 1 OS=Danio rerio OX=7955 GN=ptdss1 PE=2 SV=2
contig_7dpi0029129	1.72738e-11	ACSF2_DANRE Medium-chain acyl-CoA ligase ACSF2, mitochondrial OS=Danio rerio OX=7955 GN=acsf2 PE=2 SV=1
contig_7dpi0012469	0.00108218	CC14A_DANRE Dual specificity protein phosphatase CDC14AB OS=Danio rerio OX=7955 GN=cdc14ab PE=3 SV=1
contig_7dpi0019677	0.687565	NBEL2_DANRE Neurobeachin-like protein 2 OS=Danio rerio OX=7955 GN=nbeal2 PE=1 SV=1
contig_7dpi0030110	1.58001e-158	GBB1_DANRE Guanine nucleotide-binding protein G(I)/G(S)/G(T) subunit beta-1 OS=Danio rerio OX=7955 GN=gnb1 PE=2 SV=1
contig_7dpi0033313	0.22298	WIF1_DANRE Wnt inhibitory factor 1 OS=Danio rerio OX=7955 GN=wif1 PE=2 SV=1
contig_7dpi0076487	2.2135	DRD5L_TAKRU D(5)-like dopamine receptor OS=Takifugu rubripes OX=31033 GN=dl PE=3 SV=1
contig_7dpi0132094		not available
contig_7dpi0017238	0.770556	KPCI_DANRE Protein kinase C iota type OS=Danio rerio OX=7955 GN=prkci PE=2 SV=2
contig_7dpi0024206	4.65374e-53	SP8_DANRE Transcription factor Sp8 OS=Danio rerio OX=7955 GN=sp8b PE=2 SV=1
contig_7dpi0032085	5.25513	ALPK2_DANRE Alpha-protein kinase 2 OS=Danio rerio OX=7955 GN=alpk2 PE=2 SV=2
contig_7dpi0036835	2.25434	R213B_DANRE E3 ubiquitin-protein ligase rnf213-beta OS=Danio rerio OX=7955 GN=rnf213b PE=3 SV=1
contig_7dpi0028764	2.05347e-57	YLAT2_DANRE Y+L amino acid transporter 2 OS=Danio rerio OX=7955 GN=slc7a6 PE=2 SV=1
contig_7dpi0042152	1.96894	IQCH_DANRE IQ motif-containing protein H OS=Danio rerio OX=7955 GN=iqch PE=4 SV=1
contig_7dpi0013185	0.530067	VGFR3_DANRE Vascular endothelial growth factor receptor 3 OS=Danio rerio OX=7955 GN=flt4 PE=2 SV=1
contig_7dpi0056992	3.88657e-28	FXC1B_DANRE Forkhead box C1-B OS=Danio rerio OX=7955 GN=foxc1b PE=2 SV=1
contig_7dpi0010748	2.23241	CK049_DANRE UPF0705 protein C11orf49 homolog OS=Danio rerio OX=7955 GN=zgc:92873 PE=2 SV=1
contig_7dpi0046419	2.08284e-10	SH3R1_DANRE E3 ubiquitin-protein ligase SH3RF1 OS=Danio rerio OX=7955 GN=sh3rf1 PE=2 SV=2
contig_7dpi0099351	0.473439	PPR37_DANRE Protein phosphatase 1 regulatory subunit 37 OS=Danio rerio OX=7955 GN=ppp1r37 PE=2 SV=1
contig_7dpi0402943	3.79646	RELCH_DANRE RAB11-binding protein RELCH homolog OS=Danio rerio OX=7955 GN=relch PE=2 SV=1
contig_7dpi0074237	0	TIE2_DANRE Tyrosine-protein kinase receptor Tie-2 OS=Danio rerio OX=7955 GN=tie2 PE=2 SV=1
contig_7dpi0038481	1.29164	DAAF1_DANRE Dynein assembly factor 1, axonemal OS=Danio rerio OX=7955 GN=dnaaf1 PE=2 SV=2
contig_7dpi0009478	1.68799e-68	MYLK3_DANRE Myosin light chain kinase 3 OS=Danio rerio OX=7955 GN=mylk3 PE=2 SV=1
contig_7dpi0104962	4.42985	SAE2_DANRE SUMO-activating enzyme subunit 2 OS=Danio rerio OX=7955 GN=uba2 PE=1 SV=2
contig_7dpi0331984	9.97097	STING_DANRE Stimulator of interferon genes protein OS=Danio rerio OX=7955 GN=tmem173 PE=1 SV=1
contig_7dpi0037440	0	UBP33_DANRE Ubiquitin carboxyl-terminal hydrolase 33 OS=Danio rerio OX=7955 GN=usp33 PE=2 SV=1
contig_7dpi0016918	0.228587	PTPRF_DANRE Receptor-type tyrosine-protein phosphatase F OS=Danio rerio OX=7955 GN=ptprf PE=2 SV=1
contig_7dpi0123613		not available
contig_7dpi0029283	0.447462	SZ12A_DANRE Polycomb protein suz12-A OS=Danio rerio OX=7955 GN=suz12a PE=2 SV=1
contig_7dpi0027113	1.9967e-30	PTPRF_DANRE Receptor-type tyrosine-protein phosphatase F OS=Danio rerio OX=7955 GN=ptprf PE=2 SV=1
contig_7dpi0018767	0.122688	HV05_CARAU Ig heavy chain V region 5A OS=Carassius auratus OX=7957 PE=4 SV=1
contig_7dpi0007846		not available
contig_7dpi0051582	1.52689	GNPTA_DANRE N-acetylglucosamine-1-phosphotransferase subunits alpha/beta OS=Danio rerio OX=7955 GN=gnptab PE=1 SV=1
contig_7dpi0094977	0.177614	IFT46_DANRE Intraflagellar transport protein 46 homolog OS=Danio rerio OX=7955 GN=ift46 PE=2 SV=2
contig_7dpi0137990	1.87062	UNC50_DANRE Protein unc-50 homolog OS=Danio rerio OX=7955 GN=unc50 PE=2 SV=1
contig_7dpi0278262	1.01864	PTPRU_DANRE Receptor-type tyrosine-protein phosphatase U OS=Danio rerio OX=7955 GN=ptpru PE=2 SV=1
contig_7dpi0009650	0.0259947	YBOX1_DANRE Y-box-binding protein 1 OS=Danio rerio OX=7955 GN=ybx1 PE=1 SV=1
contig_7dpi0097927	0.397556	EDAR_ORYLA Tumor necrosis factor receptor superfamily member EDAR OS=Oryzias latipes OX=8090 GN=edar PE=2 SV=1
contig_7dpi0015879	8.92597e-124	AT1A3_OREMO Sodium/potassium-transporting ATPase subunit alpha-3 OS=Oreochromis mossambicus OX=8127 GN=atp1a3 PE=2 SV=1
contig_7dpi0023231	0	KPB2_TAKRU Phosphorylase b kinase regulatory subunit alpha, liver isoform OS=Takifugu rubripes OX=31033 GN=phka2 PE=3 SV=1
contig_7dpi0027648	0.0836211	STB1A_DANRE Histone-lysine N-methyltransferase SETDB1-A OS=Danio rerio OX=7955 GN=setdb1a PE=3 SV=1
contig_7dpi0009093	0.488839	LAMC1_DANRE Laminin subunit gamma-1 OS=Danio rerio OX=7955 GN=lamc1 PE=2 SV=2
contig_7dpi0176510	0.539704	AN32E_DANRE Acidic leucine-rich nuclear phosphoprotein 32 family member E OS=Danio rerio OX=7955 GN=anp32e PE=1 SV=1
contig_7dpi0029317	0.698276	CP1A1_DICLA Cytochrome P450 1A1 OS=Dicentrarchus labrax OX=13489 GN=cyp1a1 PE=2 SV=1
contig_7dpi0134278	2.2711	TTC17_DANRE Tetratricopeptide repeat protein 17 OS=Danio rerio OX=7955 GN=ttc17 PE=3 SV=1
contig_7dpi0096401	2.67071	MRM3B_DANRE rRNA methyltransferase 3B, mitochondrial OS=Danio rerio OX=7955 GN=rnmtl1b PE=2 SV=2
contig_7dpi0097652		not available
contig_7dpi0125246	2.83312	RNF41_DANRE E3 ubiquitin-protein ligase NRDP1 OS=Danio rerio OX=7955 GN=rnf41 PE=2 SV=1
contig_7dpi0097640	1.18823e-63	FXP1B_DANRE Forkhead box protein P1-B OS=Danio rerio OX=7955 GN=foxp1b PE=2 SV=1
contig_7dpi0102609	0.0125775	COPB_DANRE Coatomer subunit beta OS=Danio rerio OX=7955 GN=copb1 PE=2 SV=1
contig_7dpi0005737	1.84031	JAK1_CYPCA Tyrosine-protein kinase JAK1 OS=Cyprinus carpio OX=7962 GN=jak1 PE=2 SV=1
contig_7dpi0014129	7.64845	CAM1B_DANRE Calmodulin-regulated spectrin-associated protein 1-B OS=Danio rerio OX=7955 GN=camsap1b PE=3 SV=1
contig_7dpi0108552	5.52371	EFNA5_DANRE Ephrin-A5b OS=Danio rerio OX=7955 GN=efna5b PE=2 SV=1
contig_7dpi0033507		not available
contig_7dpi0102653	2.80088	CS054_DANRE UPF0692 protein C19orf54 homolog OS=Danio rerio OX=7955 GN=si:dkey-233h2.2 PE=2 SV=1
contig_7dpi0081617	9.14763	LYSC2_ONCMY Lysozyme C II OS=Oncorhynchus mykiss OX=8022 PE=1 SV=2
contig_7dpi0046721	0.119051	EFTS_DANRE Elongation factor Ts, mitochondrial OS=Danio rerio OX=7955 GN=tsfm PE=2 SV=1
contig_7dpi0024351	0.32181	EDC4_DANRE Enhancer of mRNA-decapping protein 4 OS=Danio rerio OX=7955 GN=edc4 PE=3 SV=1
contig_7dpi0034245	1.79275e-38	COX20_DANRE Cytochrome c oxidase assembly protein COX20, mitochondrial OS=Danio rerio OX=7955 GN=cox20 PE=3 SV=2
contig_7dpi0001743	2.53694	CO8B_PAROL Complement component C8 beta chain OS=Paralichthys olivaceus OX=8255 GN=c8b PE=2 SV=1
contig_7dpi0045452	2.29158e-119	PKHA8_DANRE Pleckstrin homology domain-containing family A member 8 OS=Danio rerio OX=7955 GN=plekha8 PE=2 SV=1
contig_7dpi0167983	0.0194708	LARG1_DANRE LARGE xylosyl- and glucuronyltransferase 1 OS=Danio rerio OX=7955 GN=large1 PE=2 SV=1
contig_7dpi0028982	1.41696e-77	ODO2_TAKRU Dihydrolipoyllysine-residue succinyltransferase component of 2-oxoglutarate dehydrogenase complex, mitochondrial (Fragment) OS=Takifugu rubripes OX=31033 GN=dlst PE=3 SV=1
contig_7dpi0028125	2.50568	GPER1_MICUN G-protein coupled estrogen receptor 1 OS=Micropogonias undulatus OX=29154 GN=gper1 PE=1 SV=1
contig_7dpi0046220	1.0034e-116	IGF2_ONCMY Insulin-like growth factor II OS=Oncorhynchus mykiss OX=8022 GN=igf2 PE=2 SV=1
contig_7dpi0053414	3.38079	PO4F3_DANRE POU domain, class 4, transcription factor 3 OS=Danio rerio OX=7955 GN=pou4f3 PE=2 SV=2
contig_7dpi0021502	1.18318	COA7_DANRE Cytochrome c oxidase assembly factor 7 OS=Danio rerio OX=7955 GN=coa7 PE=2 SV=1
contig_7dpi0033157	1.44817	LCLT1_DANRE Lysocardiolipin acyltransferase 1 OS=Danio rerio OX=7955 GN=lclat1 PE=1 SV=1
contig_7dpi0054640	2.55138e-07	GCR_ONCMY Glucocorticoid receptor OS=Oncorhynchus mykiss OX=8022 GN=nr3c1 PE=1 SV=1
contig_7dpi0049260	0.0231447	FOXF1_DANRE Forkhead box protein F1 OS=Danio rerio OX=7955 GN=foxf1 PE=2 SV=1
contig_7dpi0064702	0.337402	ISM2_DANRE Isthmin-2 OS=Danio rerio OX=7955 GN=ism2 PE=2 SV=1
contig_7dpi0054797	9.3687e-26	PRDM9_DANRE Histone-lysine N-methyltransferase PRDM9 OS=Danio rerio OX=7955 GN=prdm9 PE=2 SV=1
contig_7dpi0214504	0.572475	CNR1B_TAKRU Cannabinoid receptor type 1B OS=Takifugu rubripes OX=31033 GN=cnr1b PE=3 SV=1
contig_7dpi0070927	6.92999e-06	DEFI6_DANRE Differentially expressed in FDCP 6 homolog OS=Danio rerio OX=7955 GN=def6 PE=2 SV=1
contig_7dpi0119787	0.765668	AUGNA_DANRE Augurin-A OS=Danio rerio OX=7955 GN=ecrg4a PE=2 SV=2
contig_7dpi0041606		not available
contig_7dpi0013946	9.285e-25	CTNA2_DANRE Catenin alpha-2 OS=Danio rerio OX=7955 GN=Ctnna2 PE=3 SV=1
contig_7dpi0019315	3.00726	BAZ1B_DANRE Tyrosine-protein kinase BAZ1B OS=Danio rerio OX=7955 GN=baz1b PE=1 SV=2
contig_7dpi0207420	0.0106702	TGT_DANRE Queuine tRNA-ribosyltransferase catalytic subunit 1 OS=Danio rerio OX=7955 GN=qtrt1 PE=2 SV=1
contig_7dpi0003411	1.93605	OP1S1_DANRE Opsin-1, short-wave-sensitive 1 OS=Danio rerio OX=7955 GN=opn1sw1 PE=1 SV=2
contig_7dpi0020874	4.17396	143G1_DANRE 14-3-3 protein gamma-1 OS=Danio rerio OX=7955 GN=ywhag1 PE=2 SV=1
contig_7dpi0049571	0.783309	LIG1B_DANRE Leucine-rich repeat and immunoglobulin-like domain-containing nogo receptor-interacting protein 1-B OS=Danio rerio OX=7955 GN=lingo1b PE=1 SV=1
contig_7dpi0054152	2.16133e-08	IF2B3_DANRE Insulin-like growth factor 2 mRNA-binding protein 3 OS=Danio rerio OX=7955 GN=igf2bp3 PE=1 SV=1
contig_7dpi0091069	0.436741	XPOT_DANRE Exportin-T OS=Danio rerio OX=7955 GN=xpot PE=3 SV=1
contig_7dpi0003474	4.23931e-107	CHD1L_DANRE Chromodomain-helicase-DNA-binding protein 1-like OS=Danio rerio OX=7955 GN=chd1l PE=2 SV=1
contig_7dpi0040352	1.3602	T161B_DANRE Transmembrane protein 161B OS=Danio rerio OX=7955 GN=tmem161b PE=2 SV=1
contig_7dpi0030199	3.69981e-07	ASC_DANRE Apoptosis-associated speck-like protein containing a CARD OS=Danio rerio OX=7955 GN=pycard PE=1 SV=1
contig_7dpi0101959	1.82175e-79	KCNA1_ONCMY Shaker-related potassium channel tsha2 OS=Oncorhynchus mykiss OX=8022 PE=2 SV=1
contig_7dpi0015317	7.35512	CF206_DANRE Cilia- and flagella-associated protein 206 OS=Danio rerio OX=7955 GN=cfap206 PE=2 SV=1
contig_7dpi0007841		not available
contig_7dpi0065952	1.03541	SPEG_DANRE Striated muscle preferentially expressed protein kinase OS=Danio rerio OX=7955 GN=speg PE=2 SV=1
contig_7dpi0003287	5.45918	BTBBA_DANRE Ankyrin repeat and BTB/POZ domain-containing protein BTBD11-A OS=Danio rerio OX=7955 GN=btbd11a PE=3 SV=2
contig_7dpi0003870	2.21375	CLP1L_DANRE Cleft lip and palate transmembrane protein 1-like protein OS=Danio rerio OX=7955 GN=clptm1l PE=2 SV=1
contig_7dpi0092403	1.38931	LYG_CYPCA Lysozyme g OS=Cyprinus carpio OX=7962 PE=2 SV=1
contig_7dpi0084765	0.427796	NUP88_DANRE Nucleoporin 88 OS=Danio rerio OX=7955 GN=nup88 PE=1 SV=1
contig_7dpi0009240	2.87916	RN185_DANRE E3 ubiquitin-protein ligase RNF185 OS=Danio rerio OX=7955 GN=rnf185 PE=2 SV=1
contig_7dpi0019293	2.61091	ENSA_DANRE Alpha-endosulfine OS=Danio rerio OX=7955 GN=ensa PE=2 SV=1
contig_7dpi0083739	6.94816e-118	SCRN2_DANRE Secernin-2 OS=Danio rerio OX=7955 GN=scrn2 PE=2 SV=1
contig_7dpi0118981	2.59489e-41	RHG29_DANRE Rho GTPase-activating protein 29 OS=Danio rerio OX=7955 GN=arhgap29 PE=2 SV=1
contig_7dpi0062967	0.0535648	LYSM2_DANRE LysM and putative peptidoglycan-binding domain-containing protein 2 OS=Danio rerio OX=7955 GN=lysmd2 PE=2 SV=1
contig_7dpi0038876	0.371499	CWC22_DANRE Pre-mRNA-splicing factor CWC22 homolog OS=Danio rerio OX=7955 GN=cwc22 PE=2 SV=1
contig_7dpi0088444	8.48205	HPF1_DANRE Histone PARylation factor 1 OS=Danio rerio OX=7955 GN=hpf1 PE=2 SV=2
contig_7dpi0037274	0.948104	GRID2_DANRE Glutamate receptor ionotropic, delta-2 OS=Danio rerio OX=7955 GN=grid2 PE=2 SV=1
contig_7dpi0040406	0.896679	NU2M_ONCMY NADH-ubiquinone oxidoreductase chain 2 OS=Oncorhynchus mykiss OX=8022 GN=MT-ND2 PE=3 SV=1
contig_7dpi0066492	8.38779e-93	PI42C_DANRE Phosphatidylinositol 5-phosphate 4-kinase type-2 gamma OS=Danio rerio OX=7955 GN=pip4k2c PE=2 SV=1
contig_7dpi0036834	1.13461	OGFD2_DANRE 2-oxoglutarate and iron-dependent oxygenase domain-containing protein 2 OS=Danio rerio OX=7955 GN=ogfod2 PE=2 SV=1
contig_7dpi0000069	4.21731	STK10_DANRE Serine/threonine-protein kinase 10 OS=Danio rerio OX=7955 GN=stk10 PE=2 SV=1
contig_7dpi0034472	0	XPO2_DANRE Exportin-2 OS=Danio rerio OX=7955 GN=cse1l PE=1 SV=2
contig_7dpi0104137	6.88099	MUS81_DANRE Crossover junction endonuclease MUS81 OS=Danio rerio OX=7955 GN=mus81 PE=1 SV=1
contig_7dpi0045945	3.1055	PHF2_DANRE Lysine-specific demethylase phf2 OS=Danio rerio OX=7955 GN=phf2 PE=2 SV=3
contig_7dpi0044977	7.29636e-79	LAMB4_DANRE Laminin subunit beta-4 OS=Danio rerio OX=7955 GN=lamb4 PE=2 SV=1
contig_7dpi0043854	0.876224	CNFN_DANRE Cornifelin homolog OS=Danio rerio OX=7955 GN=cnfn PE=3 SV=1
contig_7dpi0007652	1.67345	KL40B_DANRE Kelch-like protein 40b OS=Danio rerio OX=7955 GN=klhl40b PE=2 SV=1
contig_7dpi0087310	0.165165	TM236_DANRE Transmembrane protein 236 OS=Danio rerio OX=7955 GN=tmem236 PE=3 SV=1
contig_7dpi0055084		not available
contig_7dpi0100234	3.01444	LRC59_DANRE Leucine-rich repeat-containing protein 59 OS=Danio rerio OX=7955 GN=lrrc59 PE=2 SV=1
contig_7dpi0032761	4.17	EPHB3_DANRE Ephrin type-B receptor 3 (Fragment) OS=Danio rerio OX=7955 GN=ephb3 PE=2 SV=1
contig_7dpi0022828	0.820415	VIT2_FUNHE Vitellogenin-2 OS=Fundulus heteroclitus OX=8078 PE=1 SV=1
contig_7dpi0035217	2.19284	ATPF1_DANRE ATP synthase mitochondrial F1 complex assembly factor 1 OS=Danio rerio OX=7955 GN=atpaf1 PE=2 SV=2
contig_7dpi0005406	4.33963e-142	CHD8_DANRE Chromodomain-helicase-DNA-binding protein 8 OS=Danio rerio OX=7955 GN=chd8 PE=3 SV=2
contig_7dpi0001564	9.12729	WNT5B_ORYLA Protein Wnt-5b OS=Oryzias latipes OX=8090 GN=wnt5b PE=2 SV=1
contig_7dpi0048820	0.612856	DISP1_DANRE Protein dispatched homolog 1 OS=Danio rerio OX=7955 GN=disp1 PE=2 SV=1
contig_7dpi0010825	9.75961e-84	S38A2_DANRE Sodium-coupled neutral amino acid transporter 2 OS=Danio rerio OX=7955 GN=slc38a2 PE=3 SV=1
contig_7dpi0060452	6.35536	ACES_ELEEL Acetylcholinesterase OS=Electrophorus electricus OX=8005 GN=ache PE=3 SV=1
contig_7dpi0002905	3.52194	RM33_TETNG 39S ribosomal protein L33, mitochondrial OS=Tetraodon nigroviridis OX=99883 GN=mrpl33 PE=3 SV=1
contig_7dpi0016189	0	GNPTA_DANRE N-acetylglucosamine-1-phosphotransferase subunits alpha/beta OS=Danio rerio OX=7955 GN=gnptab PE=1 SV=1
contig_7dpi0037721	2.05315	DOHH_DANRE Deoxyhypusine hydroxylase OS=Danio rerio OX=7955 GN=dohh PE=2 SV=1
contig_7dpi0090668	5.63994	ACY3A_DANRE N-acyl-aromatic-L-amino acid amidohydrolase (carboxylate-forming) A OS=Danio rerio OX=7955 GN=acy3.1 PE=2 SV=2
contig_7dpi0005666		not available
contig_7dpi0054917	0	TAF2_DANRE Transcription initiation factor TFIID subunit 2 OS=Danio rerio OX=7955 GN=taf2 PE=2 SV=2
contig_7dpi0042051	0.590583	VACHB_DANRE Probable vesicular acetylcholine transporter-B OS=Danio rerio OX=7955 GN=slc18a3b PE=2 SV=1
contig_7dpi0056625	0	ODO2_TAKRU Dihydrolipoyllysine-residue succinyltransferase component of 2-oxoglutarate dehydrogenase complex, mitochondrial (Fragment) OS=Takifugu rubripes OX=31033 GN=dlst PE=3 SV=1
contig_7dpi0079616	0.923242	LZIC_DANRE Protein LZIC OS=Danio rerio OX=7955 GN=lzic PE=1 SV=1
contig_7dpi0037987	1.17355e-61	NAT8L_DANRE N-acetylaspartate synthetase OS=Danio rerio OX=7955 GN=nat8l PE=2 SV=1
contig_7dpi0063207	8.31979	SCNA_ELEEL Sodium channel protein OS=Electrophorus electricus OX=8005 PE=1 SV=1
contig_7dpi0018191	0.833069	HEG_DANRE Protein HEG OS=Danio rerio OX=7955 GN=heg PE=1 SV=1
contig_7dpi0024495	9.95798	N4BP1_DANRE NEDD4-binding protein 1 OS=Danio rerio OX=7955 GN=n4bp1 PE=2 SV=3
contig_7dpi0005964	4.88046e-07	NLRC5_ICTPU Protein NLRC5 OS=Ictalurus punctatus OX=7998 GN=nlrc5 PE=2 SV=1
contig_7dpi0016948	2.11576	T161B_DANRE Transmembrane protein 161B OS=Danio rerio OX=7955 GN=tmem161b PE=2 SV=1
contig_7dpi0024303	0.000250101	DNMBP_DANRE Dynamin-binding protein OS=Danio rerio OX=7955 GN=dnmbp PE=2 SV=1
contig_7dpi0047297	0.03112	CRBN_DANRE Protein cereblon OS=Danio rerio OX=7955 GN=crbn PE=1 SV=1
contig_7dpi0033680	0	STRP1_DANRE Striatin-interacting protein 1 homolog OS=Danio rerio OX=7955 GN=strip1 PE=1 SV=1
contig_7dpi0001495	1.13292	ATG4B_DANRE Cysteine protease ATG4B OS=Danio rerio OX=7955 GN=atg4b PE=2 SV=2
contig_7dpi0050277	0.272261	ROMO1_DANRE Reactive oxygen species modulator 1 OS=Danio rerio OX=7955 GN=romo1 PE=3 SV=1
contig_7dpi0087823	0.847291	PKD2_ORYLA Polycystin-2 OS=Oryzias latipes OX=8090 GN=pkd2 PE=1 SV=2
contig_7dpi0015503	0.996682	GLCTK_DANRE Glycerate kinase OS=Danio rerio OX=7955 GN=glyctk PE=2 SV=1
contig_7dpi0029749	0.0468109	OGFD2_DANRE 2-oxoglutarate and iron-dependent oxygenase domain-containing protein 2 OS=Danio rerio OX=7955 GN=ogfod2 PE=2 SV=1
contig_7dpi0080858		not available
contig_7dpi0100262	8.95709	ABHDD_DANRE Protein ABHD13 OS=Danio rerio OX=7955 GN=abhd13 PE=2 SV=1
contig_7dpi0042584	1.38896	CPEB4_DANRE Cytoplasmic polyadenylation element-binding protein 4 OS=Danio rerio OX=7955 GN=cpeb4 PE=2 SV=1
contig_7dpi0022780	3.69525	APAF_DANRE Apoptotic protease-activating factor 1 OS=Danio rerio OX=7955 GN=apaf1 PE=2 SV=1
contig_7dpi0031182	5.64125e-13	EYS_DANRE Protein eyes shut homolog OS=Danio rerio OX=7955 GN=eys PE=1 SV=2
contig_7dpi0044717	5.75458	CB069_DANRE UPF0565 protein C2orf69 homolog OS=Danio rerio OX=7955 GN=zgc:153521 PE=2 SV=1
contig_7dpi0060406	4.20144	MYG_CHIRA Myoglobin OS=Chionodraco rastrospinosus OX=34790 GN=mb PE=2 SV=3
contig_7dpi0057627	0.867308	ELAV4_DANRE ELAV-like protein 4 OS=Danio rerio OX=7955 GN=elavl4 PE=1 SV=2
contig_7dpi0026385	2.85296	UCK1_DANRE Uridine-cytidine kinase 1 OS=Danio rerio OX=7955 GN=uck1 PE=2 SV=1
contig_7dpi0062216	0.598377	TTLL3_DANRE Tubulin monoglycylase TTLL3 OS=Danio rerio OX=7955 GN=ttll3 PE=2 SV=1
contig_7dpi0050539	3.53143	SZ12B_DANRE Polycomb protein suz12-B OS=Danio rerio OX=7955 GN=suz12b PE=2 SV=1
contig_7dpi0038838	7.8542	CLD7B_DANRE Claudin-7-B OS=Danio rerio OX=7955 GN=cldn7b PE=2 SV=1
contig_7dpi0030188	5.40707e-16	CDK2_CARAU Cyclin-dependent kinase 2 OS=Carassius auratus OX=7957 GN=cdk2 PE=1 SV=1
contig_7dpi0024169	2.17555	NEU3_CATCO Vasotocin-neurophysin VT 1 OS=Catostomus commersonii OX=7971 PE=2 SV=1
contig_7dpi0036291	2.39019	RL7A_TAKRU 60S ribosomal protein L7a OS=Takifugu rubripes OX=31033 GN=rpl7a PE=3 SV=3
contig_7dpi0009462	3.24474	CAPAM_DANRE mRNA (2'-O-methyladenosine-N(6)-)-methyltransferase OS=Danio rerio OX=7955 GN=pcif1 PE=1 SV=1
contig_7dpi0029149	4.39781e-09	DNMBP_DANRE Dynamin-binding protein OS=Danio rerio OX=7955 GN=dnmbp PE=2 SV=1
contig_7dpi0010645	1.17181e-19	UBP12_SALSA Ubiquitin carboxyl-terminal hydrolase 12 OS=Salmo salar OX=8030 GN=usp12 PE=2 SV=1
contig_7dpi0033482	4.16428	DNM1L_DANRE Dynamin-1-like protein OS=Danio rerio OX=7955 GN=dnm1l PE=2 SV=1
contig_7dpi0076365	0.0669425	APEX1_DANRE DNA-(apurinic or apyrimidinic site) lyase OS=Danio rerio OX=7955 GN=apex1 PE=1 SV=1
contig_7dpi0161575	0.378016	LMBD1_DANRE Probable lysosomal cobalamin transporter OS=Danio rerio OX=7955 GN=lmbrd1 PE=2 SV=1
contig_7dpi0060185	0.182779	FGR1A_DANRE Fibroblast growth factor receptor 1-A OS=Danio rerio OX=7955 GN=fgfr1a PE=1 SV=2
contig_7dpi0056256	3.08057	U119B_DANRE Protein unc-119 homolog B OS=Danio rerio OX=7955 GN=unc119b PE=1 SV=2
contig_7dpi0024424	9.02728	ATP6_TETNG ATP synthase subunit a OS=Tetraodon nigroviridis OX=99883 GN=mt-atp6 PE=3 SV=1
contig_7dpi0000533	0.140015	ZN704_DANRE Zinc finger protein 704 OS=Danio rerio OX=7955 GN=znf704 PE=3 SV=2
contig_7dpi0091418	0.422798	KL41B_DANRE Kelch-like protein 41b OS=Danio rerio OX=7955 GN=klhl41b PE=2 SV=1
contig_7dpi0038443	8.9948e-34	ZN12_MICSA Zinc finger protein ZFMSA12A OS=Micropterus salmoides OX=27706 PE=2 SV=1
contig_7dpi0170243	3.24275	LOX3B_DANRE Lysyl oxidase homolog 3B OS=Danio rerio OX=7955 GN=loxl3b PE=2 SV=1
contig_7dpi0057931	0.979824	FGFR3_DANRE Fibroblast growth factor receptor 3 OS=Danio rerio OX=7955 GN=fgfr3 PE=2 SV=1
contig_7dpi0053234	0.611142	TRD7B_DANRE Tudor domain-containing protein 7B OS=Danio rerio OX=7955 GN=tdrd7b PE=3 SV=2
contig_7dpi0023148	0.0489369	RIC8A_DANRE Synembryn-A OS=Danio rerio OX=7955 GN=ric8a PE=2 SV=1
contig_7dpi0021104	3.63724	F214A_DANRE Protein FAM214A OS=Danio rerio OX=7955 GN=fam214a PE=2 SV=2
contig_7dpi0006557	3.45991e-63	PTPRC_CYPCA Receptor-type tyrosine-protein phosphatase C OS=Cyprinus carpio OX=7962 GN=ptprc PE=2 SV=1
contig_7dpi0017948	2.55046e-129	CO3_ONCMY Complement C3 (Fragment) OS=Oncorhynchus mykiss OX=8022 GN=c3 PE=1 SV=1
contig_7dpi0012098	2.10552	CI116_SALSA UPF0691 protein C9orf116 homolog OS=Salmo salar OX=8030 PE=2 SV=1
contig_7dpi0027134	4.63386e-41	UEVLD_DANRE Ubiquitin-conjugating enzyme E2 variant 3 OS=Danio rerio OX=7955 GN=uevld PE=2 SV=1
contig_7dpi0021594		not available
contig_7dpi0003373	1.55618	BABA2_DANRE BRISC and BRCA1-A complex member 2 OS=Danio rerio OX=7955 GN=babam2 PE=2 SV=1
contig_7dpi0060290	0	MTNA_DANRE Methylthioribose-1-phosphate isomerase OS=Danio rerio OX=7955 GN=mri1 PE=2 SV=1
contig_7dpi0043741	6.54471e-06	SRGP2_DANRE SLIT-ROBO Rho GTPase-activating protein 2 OS=Danio rerio OX=7955 GN=srgap2 PE=2 SV=1
contig_7dpi0005934	1.74655	OPN4A_DANRE Melanopsin-A OS=Danio rerio OX=7955 GN=opn4a PE=2 SV=3
contig_7dpi0014332	0.0050478	INS_ORENI Insulin OS=Oreochromis niloticus OX=8128 GN=ins PE=1 SV=2
contig_7dpi0034069	2.01371e-06	RN170_DANRE E3 ubiquitin-protein ligase RNF170 OS=Danio rerio OX=7955 GN=rnf170 PE=2 SV=1
contig_7dpi0089734	0.94541	NPS4B_DANRE Neuronal PAS domain-containing protein 4B OS=Danio rerio OX=7955 GN=npas4b PE=3 SV=1
contig_7dpi0015342	0.00469623	YDJC_DANRE Carbohydrate deacetylase OS=Danio rerio OX=7955 GN=ydjc PE=3 SV=1
contig_7dpi0050058	1.96767e-07	COPB_DANRE Coatomer subunit beta OS=Danio rerio OX=7955 GN=copb1 PE=2 SV=1
contig_7dpi0046451	1.14	DUS27_DANRE Inactive dual specificity phosphatase 27 OS=Danio rerio OX=7955 GN=dusp27 PE=1 SV=1
contig_7dpi0159807		not available
contig_7dpi0038468	0.244312	EIF3C_DANRE Eukaryotic translation initiation factor 3 subunit C OS=Danio rerio OX=7955 GN=eif3c PE=1 SV=1
contig_7dpi0081391		not available
contig_7dpi0083201	0	CTL2B_DANRE CTD small phosphatase-like protein 2-B OS=Danio rerio OX=7955 GN=ctdspl2b PE=2 SV=1
contig_7dpi0036486	3.33971	UEVLD_DANRE Ubiquitin-conjugating enzyme E2 variant 3 OS=Danio rerio OX=7955 GN=uevld PE=2 SV=1
contig_7dpi0101653	7.70688e-93	LIPH_DANRE Lipase member H OS=Danio rerio OX=7955 GN=liph PE=2 SV=1
contig_7dpi0101891	9.82829	SSRA_ONCMY Translocon-associated protein subunit alpha OS=Oncorhynchus mykiss OX=8022 GN=ssr1 PE=2 SV=1
contig_7dpi0000162	4.55859	C42S2_DANRE CDC42 small effector protein 2 OS=Danio rerio OX=7955 GN=cdc42se2 PE=3 SV=1
contig_7dpi0154083	1.96844e-05	ZN143_DANRE Zinc finger protein 143 OS=Danio rerio OX=7955 GN=znf143 PE=2 SV=2
contig_7dpi0054830	0.595099	CYFP1_DANRE Cytoplasmic FMR1-interacting protein 1 homolog OS=Danio rerio OX=7955 GN=cyfip1 PE=2 SV=1
contig_7dpi0015080	1.52231	P5CR3_DANRE Pyrroline-5-carboxylate reductase 3 OS=Danio rerio OX=7955 GN=pycr3 PE=2 SV=1
contig_7dpi0087856	0.904103	HOGA1_DANRE 4-hydroxy-2-oxoglutarate aldolase, mitochondrial OS=Danio rerio OX=7955 GN=zgc:77082 PE=2 SV=1
contig_7dpi0021925	1.18102e-18	SE1BA_DANRE Histone-lysine N-methyltransferase SETD1B-A OS=Danio rerio OX=7955 GN=setd1ba PE=1 SV=2
contig_7dpi0093784	0.933403	EYS_DANRE Protein eyes shut homolog OS=Danio rerio OX=7955 GN=eys PE=1 SV=2
contig_7dpi0064276	2.88207	LECG_THANI Galactose-specific lectin nattectin OS=Thalassophryne nattereri OX=289382 PE=1 SV=1
contig_7dpi0023566	0.854691	KPCI_DANRE Protein kinase C iota type OS=Danio rerio OX=7955 GN=prkci PE=2 SV=2
contig_7dpi0050484	0.175579	CYTSA_DANRE Cytospin-A OS=Danio rerio OX=7955 GN=specc1la PE=2 SV=2
contig_7dpi0184473	6.73943	GATB_DANRE Glutamyl-tRNA(Gln) amidotransferase subunit B, mitochondrial OS=Danio rerio OX=7955 GN=gatb PE=3 SV=2
contig_7dpi0042198	0.084043	CDAC1_DANRE Cytidine and dCMP deaminase domain-containing protein 1 OS=Danio rerio OX=7955 GN=cdadc1 PE=2 SV=1
contig_7dpi0035638	1.25069	SBP1_DANRE Methanethiol oxidase OS=Danio rerio OX=7955 GN=selenbp1 PE=2 SV=1
contig_7dpi0015872	2.71185	MCTS1_DANRE Malignant T-cell-amplified sequence 1 OS=Danio rerio OX=7955 GN=mcts1 PE=2 SV=1
contig_7dpi0009510	0.729099	XIRP1_DANRE Xin actin-binding repeat-containing protein 1 OS=Danio rerio OX=7955 GN=xirp1 PE=1 SV=1
contig_7dpi0065092	2.96991	DHSDB_DANRE Succinate dehydrogenase [ubiquinone] cytochrome b small subunit B, mitochondrial OS=Danio rerio OX=7955 GN=sdhdb PE=2 SV=1
contig_7dpi0037086	6.39371	XRP2_DANRE Protein XRP2 OS=Danio rerio OX=7955 GN=rp2 PE=1 SV=1
contig_7dpi0029821	2.25238e-142	SEM3D_DANRE Semaphorin-3D OS=Danio rerio OX=7955 GN=sema3d PE=2 SV=1
contig_7dpi0013326	0.254382	AKIB1_DANRE Ankyrin repeat and IBR domain-containing protein 1 OS=Danio rerio OX=7955 GN=ankib1 PE=3 SV=1
contig_7dpi0057219	2.87711	HELZ_DANRE Probable helicase with zinc finger domain OS=Danio rerio OX=7955 GN=helz PE=2 SV=1
contig_7dpi0030298	0.0884402	SPDLY_DANRE Protein Spindly OS=Danio rerio OX=7955 GN=spdl1 PE=2 SV=1
contig_7dpi0026553	3.20885	REST_DANRE RE1-silencing transcription factor OS=Danio rerio OX=7955 GN=rest PE=2 SV=1
contig_7dpi0063588	0.1164	LRMP_DANRE Lymphoid-restricted membrane protein OS=Danio rerio OX=7955 GN=lrmp PE=1 SV=2
contig_7dpi0035666	1.99353	CE022_DANRE UPF0489 protein C5orf22 homolog OS=Danio rerio OX=7955 GN=zgc:56556 PE=2 SV=1
contig_7dpi0008030	8.8842e-58	MYSS_CYPCA Myosin heavy chain, fast skeletal muscle OS=Cyprinus carpio OX=7962 PE=2 SV=2
contig_7dpi0012048	0	CYFP1_DANRE Cytoplasmic FMR1-interacting protein 1 homolog OS=Danio rerio OX=7955 GN=cyfip1 PE=2 SV=1
contig_7dpi0034300	3.3907	IF172_DANRE Intraflagellar transport protein 172 homolog OS=Danio rerio OX=7955 GN=ift172 PE=2 SV=1
contig_7dpi0036385	1.38753e-08	NLRC5_ICTPU Protein NLRC5 OS=Ictalurus punctatus OX=7998 GN=nlrc5 PE=2 SV=1
contig_7dpi0060735	7.3272	NBL1_DANRE Neuroblastoma suppressor of tumorigenicity 1 OS=Danio rerio OX=7955 GN=nbl1 PE=2 SV=1
contig_7dpi0021251	4.90867e-28	CDK2_CARAU Cyclin-dependent kinase 2 OS=Carassius auratus OX=7957 GN=cdk2 PE=1 SV=1
contig_7dpi0055165	1.05643	JAK1_CYPCA Tyrosine-protein kinase JAK1 OS=Cyprinus carpio OX=7962 GN=jak1 PE=2 SV=1
contig_7dpi0069022	0.986346	CE290_DANRE Centrosomal protein of 290 kDa OS=Danio rerio OX=7955 GN=cep290 PE=2 SV=1
contig_7dpi0062711	0.252382	PNO1_DANRE RNA-binding protein PNO1 OS=Danio rerio OX=7955 GN=pno1 PE=2 SV=2
contig_7dpi0030638	1.34033	I2B2B_DANRE Interferon regulatory factor 2-binding protein 2-B OS=Danio rerio OX=7955 GN=irf2bp2b PE=2 SV=1
contig_7dpi0001456	1.62766e-72	HELZ_DANRE Probable helicase with zinc finger domain OS=Danio rerio OX=7955 GN=helz PE=2 SV=1
contig_7dpi0011254	2.16357	EFHC2_DANRE EF-hand domain-containing family member C2 OS=Danio rerio OX=7955 GN=efhc2 PE=2 SV=2
contig_7dpi0059457	0.713896	PP1R7_DANRE Protein phosphatase 1 regulatory subunit 7 OS=Danio rerio OX=7955 GN=ppp1r7 PE=2 SV=1
contig_7dpi0172118	0.248621	143B2_ONCMY 14-3-3 protein beta/alpha-2 OS=Oncorhynchus mykiss OX=8022 PE=2 SV=1
contig_7dpi0001200	4.59721e-32	ANR52_DANRE Serine/threonine-protein phosphatase 6 regulatory ankyrin repeat subunit C OS=Danio rerio OX=7955 GN=ankrd52 PE=2 SV=1
contig_7dpi0034517	0.938414	TRM5_DANRE tRNA (guanine(37)-N1)-methyltransferase OS=Danio rerio OX=7955 GN=trmt5 PE=3 SV=1
contig_7dpi0029822	1.75698e-09	NEK8_DANRE Serine/threonine-protein kinase Nek8 OS=Danio rerio OX=7955 GN=nek8 PE=2 SV=1
contig_7dpi0029460	0.482288	HTR5A_DANRE HEAT repeat-containing protein 5A OS=Danio rerio OX=7955 GN=heatr5a PE=2 SV=1
contig_7dpi0056294	4.48521e-169	NDC1_DANRE Nucleoporin NDC1 OS=Danio rerio OX=7955 GN=ndc1 PE=2 SV=1
contig_7dpi0106536	0.114787	UBP37_DANRE Ubiquitin carboxyl-terminal hydrolase 37 OS=Danio rerio OX=7955 GN=usp37 PE=2 SV=1
contig_7dpi0031131	0	ARR1_ONCMY Arrestin red cell isoform 1 OS=Oncorhynchus mykiss OX=8022 PE=2 SV=1
contig_7dpi0108088		not available
contig_7dpi0019965	2.20026	RBBP4_DANRE Histone-binding protein RBBP4 OS=Danio rerio OX=7955 GN=rbbp4 PE=2 SV=3
contig_7dpi0019067	0.0398012	CVN4A_DANRE Caveolae-associated protein 4a OS=Danio rerio OX=7955 GN=cavin4a PE=1 SV=1
contig_7dpi0010356	4.51989e-09	LIS1_TETNG Lissencephaly-1 homolog OS=Tetraodon nigroviridis OX=99883 GN=pafah1b1 PE=3 SV=1
contig_7dpi0152864	2.04259e-15	NOC3L_DANRE Nucleolar complex protein 3 homolog OS=Danio rerio OX=7955 GN=noc3l PE=2 SV=1
contig_7dpi0031415	0.931067	SC5A9_DANRE Sodium/glucose cotransporter 4 OS=Danio rerio OX=7955 GN=slc5a9 PE=2 SV=1
contig_7dpi0103723	1.44898	INS1A_DANRE Insulinoma-associated protein 1a OS=Danio rerio OX=7955 GN=insm1a PE=2 SV=1
contig_7dpi0029750	8.18931e-13	GT251_DANRE Procollagen galactosyltransferase 1 OS=Danio rerio OX=7955 GN=colgalt1 PE=3 SV=1
contig_7dpi0038620	2.08194e-46	KIF7_DANRE Kinesin-like protein kif7 OS=Danio rerio OX=7955 GN=kif7 PE=1 SV=1
contig_7dpi0096041	1.39047	KL40B_DANRE Kelch-like protein 40b OS=Danio rerio OX=7955 GN=klhl40b PE=2 SV=1
contig_7dpi0037669	1.33894	SYVC_TAKRU Valine--tRNA ligase OS=Takifugu rubripes OX=31033 GN=vars PE=3 SV=1
contig_7dpi0025755	6.25034e-09	TRIPC_DANRE E3 ubiquitin-protein ligase TRIP12 OS=Danio rerio OX=7955 GN=trip12 PE=3 SV=1
contig_7dpi0042193	2.15638e-39	TRI33_DANRE E3 ubiquitin-protein ligase TRIM33 OS=Danio rerio OX=7955 GN=trim33 PE=2 SV=1
contig_7dpi0049090	5.34426e-14	BC7BB_DANRE B-cell CLL/lymphoma 7 protein family member B-B OS=Danio rerio OX=7955 GN=bcl7bb PE=2 SV=1
contig_7dpi0015605	1.89657	CYGB1_DANRE Cytoglobin-1 OS=Danio rerio OX=7955 GN=cygb1 PE=2 SV=2
contig_7dpi0062026	3.14924	NU4M_TETNG NADH-ubiquinone oxidoreductase chain 4 OS=Tetraodon nigroviridis OX=99883 GN=MT-ND4 PE=3 SV=1
contig_7dpi0039306	0.000548307	PHC2_DANRE Polyhomeotic-like protein 2 OS=Danio rerio OX=7955 GN=phc2 PE=2 SV=1
contig_7dpi0018159	0.868392	IKKA_DANRE Inhibitor of nuclear factor kappa-B kinase subunit alpha OS=Danio rerio OX=7955 GN=chuk PE=1 SV=1
contig_7dpi0141740	0.260679	EYS_DANRE Protein eyes shut homolog OS=Danio rerio OX=7955 GN=eys PE=1 SV=2
contig_7dpi0012621	6.64841	RHG29_DANRE Rho GTPase-activating protein 29 OS=Danio rerio OX=7955 GN=arhgap29 PE=2 SV=1
contig_7dpi0036305		not available
contig_7dpi0050473	3.0689	UBL4A_ESOLU Ubiquitin-like protein 4A OS=Esox lucius OX=8010 GN=ubl4a PE=2 SV=1
contig_7dpi0095616	9.79141	G3P2_DANRE Glyceraldehyde-3-phosphate dehydrogenase 2 OS=Danio rerio OX=7955 GN=gapdh-2 PE=2 SV=1
contig_7dpi0292034	9.55951	ALPK2_DANRE Alpha-protein kinase 2 OS=Danio rerio OX=7955 GN=alpk2 PE=2 SV=2
contig_7dpi0043126	6.24204e-71	E41L4_DANRE Band 4.1-like protein 4 OS=Danio rerio OX=7955 GN=epb4.1l4 PE=2 SV=1
contig_7dpi0099512	0.543692	S12A3_PSEAM Solute carrier family 12 member 3 OS=Pseudopleuronectes americanus OX=8265 GN=slc12a3 PE=2 SV=1
contig_7dpi0685442	0.0735378	NR1AA_DANRE Neurexin-1a OS=Danio rerio OX=7955 GN=nrxn1a PE=2 SV=1
contig_7dpi0065637	0.676851	HTR5A_DANRE HEAT repeat-containing protein 5A OS=Danio rerio OX=7955 GN=heatr5a PE=2 SV=1
contig_7dpi0095039	7.3828e-07	ERAL1_SALSA GTPase Era, mitochondrial OS=Salmo salar OX=8030 GN=eral1 PE=2 SV=1
contig_7dpi0002123	5.1546	LHPL6_DANRE LHFPL tetraspan subfamily member 6 protein OS=Danio rerio OX=7955 GN=lhfpl6 PE=2 SV=1
contig_7dpi0017280	2.47381e-145	PTPRF_DANRE Receptor-type tyrosine-protein phosphatase F OS=Danio rerio OX=7955 GN=ptprf PE=2 SV=1
contig_7dpi0074515	9.18454e-159	MLEC_DANRE Malectin OS=Danio rerio OX=7955 GN=mlec PE=3 SV=1
contig_7dpi0086967	2.44079e-10	MYCB2_DANRE E3 ubiquitin-protein ligase MYCBP2 OS=Danio rerio OX=7955 GN=mycbp2 PE=2 SV=1
contig_7dpi0111369	2.52683e-45	STK3_DANRE Serine/threonine-protein kinase 3 OS=Danio rerio OX=7955 GN=stk3 PE=2 SV=1
contig_7dpi0217738	0.650508	KEP1A_DANRE Kelch-like ECH-associated protein 1A OS=Danio rerio OX=7955 GN=keap1a PE=1 SV=1
contig_7dpi0034602	0.739028	BCL7A_DANRE B-cell CLL/lymphoma 7 protein family member A OS=Danio rerio OX=7955 GN=bcl7a PE=2 SV=1
contig_7dpi0028264	0.871043	STB1A_DANRE Histone-lysine N-methyltransferase SETDB1-A OS=Danio rerio OX=7955 GN=setdb1a PE=3 SV=1
contig_7dpi0008163	2.43899e-17	STXB_SYNHO Stonustoxin subunit beta OS=Synanceia horrida OX=13279 PE=1 SV=3
contig_7dpi0105582		not available
contig_7dpi0012218	1.90381	MIPT3_DANRE TRAF3-interacting protein 1 OS=Danio rerio OX=7955 GN=traf3ip1 PE=2 SV=1
contig_7dpi0031575	0.378928	CYTSA_TETNG Cytospin-A OS=Tetraodon nigroviridis OX=99883 GN=specc1l PE=2 SV=1
contig_7dpi0034278	0.00208366	GLYR1_DANRE Putative oxidoreductase GLYR1 OS=Danio rerio OX=7955 GN=glyr1 PE=2 SV=1
contig_7dpi0079045	0.501579	RSLBB_DANRE Ras-like protein family member 11B OS=Danio rerio OX=7955 GN=rasl11b PE=2 SV=1
contig_7dpi0114716	0.472733	IF172_DANRE Intraflagellar transport protein 172 homolog OS=Danio rerio OX=7955 GN=ift172 PE=2 SV=1
contig_7dpi0046916	3.54728e-139	CARM1_DANRE Histone-arginine methyltransferase CARM1 OS=Danio rerio OX=7955 GN=carm1 PE=2 SV=1
contig_7dpi0065250	1.29803	R1441_DANRE Probable E3 ubiquitin-protein ligase RNF144A-A OS=Danio rerio OX=7955 GN=rnf144aa PE=3 SV=1
contig_7dpi0072431	0.489781	CHUR_DANRE Protein Churchill OS=Danio rerio OX=7955 GN=churc1 PE=2 SV=1
contig_7dpi0007761	8.12801	OBRG_DANRE Leptin receptor gene-related protein OS=Danio rerio OX=7955 GN=leprot PE=2 SV=1
contig_7dpi0046058		not available
contig_7dpi0006382	1.17612	MYO1C_DANRE Unconventional myosin-Ic OS=Danio rerio OX=7955 GN=myo1c PE=3 SV=1
contig_7dpi0047376	0.666182	CNO6L_DANRE CCR4-NOT transcription complex subunit 6-like OS=Danio rerio OX=7955 GN=cnot6l PE=2 SV=1
contig_7dpi0028897	0.143924	CXG1_DANRE Gap junction gamma-1 protein OS=Danio rerio OX=7955 GN=gjc1 PE=2 SV=1
contig_7dpi0006681	2.20187e-64	MK14A_CYPCA Mitogen-activated protein kinase 14A OS=Cyprinus carpio OX=7962 GN=mapk14a PE=1 SV=1
contig_7dpi0106275	4.06156	SN25A_CARAU Synaptosomal-associated protein 25-A OS=Carassius auratus OX=7957 GN=snap25a PE=2 SV=1
contig_7dpi0032952	2.49809	CACO1_DANRE Calcium-binding and coiled-coil domain-containing protein 1 OS=Danio rerio OX=7955 GN=calcoco1 PE=3 SV=1
contig_7dpi0023047	4.10287	MED23_DANRE Mediator of RNA polymerase II transcription subunit 23 OS=Danio rerio OX=7955 GN=med23 PE=2 SV=2
contig_7dpi0032682	0.920971	CA198_DANRE Uncharacterized protein C1orf198 homolog OS=Danio rerio OX=7955 GN=wu:fa18f11 PE=2 SV=2
contig_7dpi0028158	1.53267	B3GL2_DANRE UDP-GalNAc:beta-1,3-N-acetylgalactosaminyltransferase 2 OS=Danio rerio OX=7955 GN=b3galnt2 PE=2 SV=1
contig_7dpi0088350	0.246518	SKAP1_TAKRU Src kinase-associated phosphoprotein 1 OS=Takifugu rubripes OX=31033 GN=skap1 PE=3 SV=1
contig_7dpi0007655	3.05661	DI2BA_DANRE Disco-interacting protein 2 homolog B-A OS=Danio rerio OX=7955 GN=dip2ba PE=2 SV=1
contig_7dpi0036397	6.82536e-119	LIS1A_SALSA Lissencephaly-1 homolog A OS=Salmo salar OX=8030 GN=pafah1b1-1 PE=2 SV=1
contig_7dpi0025028	8.29603	AT2A1_MAKNI Sarcoplasmic/endoplasmic reticulum calcium ATPase 1 OS=Makaira nigricans OX=13604 GN=atp2a1 PE=2 SV=2
contig_7dpi0108412	1.13147	NDF6A_DANRE Neurogenic differentiation factor 6-A OS=Danio rerio OX=7955 GN=neurod6a PE=2 SV=1
contig_7dpi0063495	0.00176014	UBAD2_DANRE UBA-like domain-containing protein 2 OS=Danio rerio OX=7955 GN=ubald2 PE=2 SV=1
contig_7dpi0040677	3.64062	MYO1C_DANRE Unconventional myosin-Ic OS=Danio rerio OX=7955 GN=myo1c PE=3 SV=1
contig_7dpi0033415	0.810584	KL41B_DANRE Kelch-like protein 41b OS=Danio rerio OX=7955 GN=klhl41b PE=2 SV=1
contig_7dpi0092204	2.42888e-93	SMR8A_DANRE Guanine nucleotide exchange protein smcr8a OS=Danio rerio OX=7955 GN=smcr8a PE=3 SV=1
contig_7dpi0124177	1.82469	PATL1_DANRE Protein PAT1 homolog 1 OS=Danio rerio OX=7955 GN=patl1 PE=1 SV=1
contig_7dpi0052869	0.308081	SYVN1_DANRE E3 ubiquitin-protein ligase synoviolin OS=Danio rerio OX=7955 GN=syvn1 PE=2 SV=2
contig_7dpi0085568	0.471717	PK1L1_ORYLA Polycystic kidney disease 1 like 1 OS=Oryzias latipes OX=8090 GN=pkd1l1 PE=1 SV=2
contig_7dpi0040498	5.25896	TDRD9_DANRE ATP-dependent RNA helicase TDRD9 OS=Danio rerio OX=7955 GN=tdrd9 PE=2 SV=1
contig_7dpi0014722	1.67281	IMA6_DANRE Importin subunit alpha-6 OS=Danio rerio OX=7955 GN=kpna5 PE=2 SV=2
contig_7dpi0046830	0.168316	TRH_ONCNE Pro-thyrotropin-releasing hormone-A OS=Oncorhynchus nerka OX=8023 GN=trha PE=2 SV=1
contig_7dpi0057339	2.45859	HYOU1_DANRE Hypoxia up-regulated protein 1 OS=Danio rerio OX=7955 GN=hyou1 PE=2 SV=1
contig_7dpi0020200	4.70639	TM201_DANRE Transmembrane protein 201 OS=Danio rerio OX=7955 GN=tmem201 PE=2 SV=1
contig_7dpi0076987	7.11317e-142	NCLDA_DANRE Neurocalcin-delta A OS=Danio rerio OX=7955 GN=ncalda PE=2 SV=1
contig_7dpi0110391	3.24733	SAMH1_DANRE Deoxynucleoside triphosphate triphosphohydrolase SAMHD1 OS=Danio rerio OX=7955 GN=samhd1 PE=2 SV=2
contig_7dpi0044046	0.726814	TT39C_DANRE Tetratricopeptide repeat protein 39C OS=Danio rerio OX=7955 GN=ttc39c PE=2 SV=1
contig_7dpi0013886	7.14497e-81	TIE2_DANRE Tyrosine-protein kinase receptor Tie-2 OS=Danio rerio OX=7955 GN=tie2 PE=2 SV=1
contig_7dpi0267685	5.21732	UBAP1_DANRE Ubiquitin-associated protein 1 OS=Danio rerio OX=7955 GN=ubap1 PE=2 SV=1
contig_7dpi0007917	0.751033	NU4LM_CYPCA NADH-ubiquinone oxidoreductase chain 4L OS=Cyprinus carpio OX=7962 GN=MT-ND4L PE=3 SV=1
contig_7dpi0026414	7.64982e-39	DEXI_DANRE Dexamethasone-induced protein homolog OS=Danio rerio OX=7955 GN=dexi PE=3 SV=1
contig_7dpi0005088	1.3058e-99	I80DB_DANRE INO80 complex subunit D-B OS=Danio rerio OX=7955 GN=ino80db PE=2 SV=1
contig_7dpi0000044		not available
contig_7dpi0052722	2.89123e-107	Z687B_DANRE Zinc finger protein 687b OS=Danio rerio OX=7955 GN=znf687b PE=2 SV=1
contig_7dpi0005478	0	EZH2_DANRE Histone-lysine N-methyltransferase EZH2 OS=Danio rerio OX=7955 GN=ezh2 PE=2 SV=1
contig_7dpi0067417	4.50401e-06	SKA3_DANRE Spindle and kinetochore-associated protein 3 OS=Danio rerio OX=7955 GN=ska3 PE=1 SV=2
contig_7dpi0050190	7.39776e-59	JMJD6_DANRE Bifunctional arginine demethylase and lysyl-hydroxylase JMJD6 OS=Danio rerio OX=7955 GN=jmjd6 PE=2 SV=2
contig_7dpi0006256	3.21896	CAH2_TRIHK Carbonic anhydrase 2 OS=Tribolodon hakonensis OX=151740 GN=ca2 PE=2 SV=3
contig_7dpi0060670	2.41646e-28	AR8BA_DANRE ADP-ribosylation factor-like protein 8B-A OS=Danio rerio OX=7955 GN=arl8ba PE=2 SV=1
contig_7dpi0087441	8.86739e-06	NLRC5_ICTPU Protein NLRC5 OS=Ictalurus punctatus OX=7998 GN=nlrc5 PE=2 SV=1
contig_7dpi0053791	0.341293	PK1L1_ORYLA Polycystic kidney disease 1 like 1 OS=Oryzias latipes OX=8090 GN=pkd1l1 PE=1 SV=2
contig_7dpi0002650		not available
contig_7dpi0133125	3.94565e-09	SRC_DANRE Proto-oncogene tyrosine-protein kinase Src OS=Danio rerio OX=7955 GN=src PE=1 SV=2
contig_7dpi0083551	0.921004	SC5AC_DANRE Sodium-coupled monocarboxylate transporter 2 OS=Danio rerio OX=7955 GN=slc5a12 PE=1 SV=1
contig_7dpi0071183	2.26378	RLP24_DANRE Probable ribosome biogenesis protein RLP24 OS=Danio rerio OX=7955 GN=rsl24d1 PE=2 SV=1
contig_7dpi0051348	0.124138	CYTSA_TETNG Cytospin-A OS=Tetraodon nigroviridis OX=99883 GN=specc1l PE=2 SV=1
contig_7dpi0052248	2.38413	CASD1_DANRE N-acetylneuraminate 9-O-acetyltransferase OS=Danio rerio OX=7955 GN=casd1 PE=2 SV=2
contig_7dpi0044132	0.868706	VGFR3_DANRE Vascular endothelial growth factor receptor 3 OS=Danio rerio OX=7955 GN=flt4 PE=2 SV=1
contig_7dpi0357054	1.14064	FGFR3_DANRE Fibroblast growth factor receptor 3 OS=Danio rerio OX=7955 GN=fgfr3 PE=2 SV=1
contig_7dpi0046353	0.0633478	SPOLB_DANRE Speckle-type POZ protein-like B OS=Danio rerio OX=7955 GN=spoplb PE=2 SV=2
contig_7dpi0048938	0.148831	RFIP3_DANRE Rab11 family-interacting protein 3 OS=Danio rerio OX=7955 GN=rab11fip3 PE=3 SV=1
contig_7dpi0054406	1.55662e-11	ACBD6_DANRE Acyl-CoA-binding domain-containing protein 6 OS=Danio rerio OX=7955 GN=acbd6 PE=2 SV=1
contig_7dpi0056229	0.325639	PSM4A_DANRE Proteasome activator complex subunit 4A OS=Danio rerio OX=7955 GN=psme4a PE=3 SV=2
contig_7dpi0059932	1.29858e-21	CLAT_DANRE Choline O-acetyltransferase OS=Danio rerio OX=7955 GN=chat PE=2 SV=1
contig_7dpi0013445	4.28749e-169	STK10_DANRE Serine/threonine-protein kinase 10 OS=Danio rerio OX=7955 GN=stk10 PE=2 SV=1
contig_7dpi0006544	9.45992e-23	CFTR_DANRE Cystic fibrosis transmembrane conductance regulator OS=Danio rerio OX=7955 GN=cftr PE=1 SV=1
contig_7dpi0051857	1.77278e-53	MYO1C_DANRE Unconventional myosin-Ic OS=Danio rerio OX=7955 GN=myo1c PE=3 SV=1
contig_7dpi0025076	0.0116941	CYTSA_DANRE Cytospin-A OS=Danio rerio OX=7955 GN=specc1la PE=2 SV=2
contig_7dpi0020529	1.79422	PTC1_DANRE Protein patched homolog 1 OS=Danio rerio OX=7955 GN=ptch1 PE=2 SV=1
contig_7dpi0055422	1.43687	GNAI1_ORYLA Guanine nucleotide-binding protein G(i) subunit alpha-1 OS=Oryzias latipes OX=8090 GN=gnai1 PE=2 SV=3
contig_7dpi0027287	2.85548e-159	RNF41_DANRE E3 ubiquitin-protein ligase NRDP1 OS=Danio rerio OX=7955 GN=rnf41 PE=2 SV=1
contig_7dpi0079061	0.0921463	RFX3_DANRE Transcription factor RFX3 OS=Danio rerio OX=7955 GN=rfx3 PE=2 SV=1
contig_7dpi0003813	3.15352e-11	NLRC5_ICTPU Protein NLRC5 OS=Ictalurus punctatus OX=7998 GN=nlrc5 PE=2 SV=1
contig_7dpi0058889	9.78457e-100	PTPRF_DANRE Receptor-type tyrosine-protein phosphatase F OS=Danio rerio OX=7955 GN=ptprf PE=2 SV=1
contig_7dpi0059275	1.24622	RABL3_DANRE Rab-like protein 3 OS=Danio rerio OX=7955 GN=rabl3 PE=2 SV=1
contig_7dpi0099030	0.96799	TYW3_DANRE tRNA wybutosine-synthesizing protein 3 homolog OS=Danio rerio OX=7955 GN=tyw3 PE=2 SV=1
contig_7dpi0074926		not available
contig_7dpi0027052	2.43059e-67	DRL_DANRE Zinc finger protein draculin OS=Danio rerio OX=7955 GN=drl PE=2 SV=2
contig_7dpi0019741	0.0970003	SUSD4_DANRE Sushi domain-containing protein 4 OS=Danio rerio OX=7955 GN=susd4 PE=3 SV=1
contig_7dpi0003110	1.15611e-07	KPCB_DANRE Protein kinase C beta type OS=Danio rerio OX=7955 GN=prkcbb PE=2 SV=1
contig_7dpi0012262	4.12945	KAT2B_DANRE Histone acetyltransferase KAT2B OS=Danio rerio OX=7955 GN=kat2b PE=2 SV=1
contig_7dpi0008451	0.0110753	RABEK_DANRE Rab9 effector protein with kelch motifs OS=Danio rerio OX=7955 GN=rabepk PE=2 SV=1
contig_7dpi0034626	2.18823	RTCB_DANRE tRNA-splicing ligase RtcB homolog OS=Danio rerio OX=7955 GN=rtcb PE=2 SV=1
contig_7dpi0019172	0.680123	SH34A_DANRE SH3 domain-binding protein 4-A OS=Danio rerio OX=7955 GN=sh3bp4a PE=2 SV=1
contig_7dpi0005279	1.82114	KANL3_DANRE KAT8 regulatory NSL complex subunit 3 OS=Danio rerio OX=7955 GN=kansl3 PE=2 SV=1
contig_7dpi0137508	4.8417	WNT8A_DANRE Protein Wnt-8a OS=Danio rerio OX=7955 GN=wnt8a PE=2 SV=2
contig_7dpi0055631	3.44721	TSH1_DANRE Teashirt homolog 1 OS=Danio rerio OX=7955 GN=tshz1 PE=2 SV=1
contig_7dpi0018337	5.14937e-13	SOX14_DANRE Transcription factor Sox-14 OS=Danio rerio OX=7955 GN=sox14 PE=2 SV=1
contig_7dpi0008245	1.58526e-07	EPB4B_DANRE Ephrin type-B receptor 4b OS=Danio rerio OX=7955 GN=ephb4b PE=2 SV=2
contig_7dpi0039178	0.615706	ARR2_ONCMY Arrestin red cell isoform 2 OS=Oncorhynchus mykiss OX=8022 PE=2 SV=1
contig_7dpi0055857	6.49062	LEG2_CONMY Congerin-2 OS=Conger myriaster OX=7943 PE=1 SV=3
contig_7dpi0058068	0.791538	NGF_DANRE Nerve growth factor OS=Danio rerio OX=7955 GN=ngf PE=2 SV=1
contig_7dpi0004833	9.02566	FGFR2_DANRE Fibroblast growth factor receptor 2 OS=Danio rerio OX=7955 GN=fgfr2 PE=1 SV=1
contig_7dpi0055171	6.99994e-14	PP4CB_DANRE Serine/threonine-protein phosphatase 4 catalytic subunit B OS=Danio rerio OX=7955 GN=ppp4cb PE=2 SV=1
contig_7dpi0078850	1.27228	GBLP_DANRE Guanine nucleotide-binding protein subunit beta-2-like 1 OS=Danio rerio OX=7955 GN=gnb2l1 PE=2 SV=1
contig_7dpi0012873	3.4968	XIRP1_DANRE Xin actin-binding repeat-containing protein 1 OS=Danio rerio OX=7955 GN=xirp1 PE=1 SV=1
contig_7dpi0096813	0.159064	NUDC1_DANRE NudC domain-containing protein 1 OS=Danio rerio OX=7955 GN=nudcd1 PE=2 SV=1
contig_7dpi0008655	0.104017	DDX46_DANRE Probable ATP-dependent RNA helicase DDX46 OS=Danio rerio OX=7955 GN=ddx46 PE=2 SV=1
contig_7dpi0011134	0	RHG29_DANRE Rho GTPase-activating protein 29 OS=Danio rerio OX=7955 GN=arhgap29 PE=2 SV=1
contig_7dpi0031228	1.2296	FUT10_DANRE Alpha-(1,3)-fucosyltransferase 10 OS=Danio rerio OX=7955 GN=fut10 PE=2 SV=3
contig_7dpi0103992		not available
contig_7dpi0037510	0.286607	TRFE_PAROL Serotransferrin OS=Paralichthys olivaceus OX=8255 GN=tf PE=2 SV=1
contig_7dpi0069840	4.84484e-79	FCHO2_DANRE F-BAR domain only protein 2 OS=Danio rerio OX=7955 GN=fcho2 PE=2 SV=1
contig_7dpi0128261	1.08519e-29	R213A_DANRE E3 ubiquitin-protein ligase rnf213-alpha OS=Danio rerio OX=7955 GN=rnf213a PE=3 SV=1
contig_7dpi0013027	6.19855e-42	DRL_DANRE Zinc finger protein draculin OS=Danio rerio OX=7955 GN=drl PE=2 SV=2
contig_7dpi0012734		not available
contig_7dpi0095983	1.10374e-24	STXB_SYNHO Stonustoxin subunit beta OS=Synanceia horrida OX=13279 PE=1 SV=3
contig_7dpi0025310	6.7852	KCNA1_ONCMY Shaker-related potassium channel tsha2 OS=Oncorhynchus mykiss OX=8022 PE=2 SV=1
contig_7dpi0018783	2.17114	DCAKD_DANRE Dephospho-CoA kinase domain-containing protein OS=Danio rerio OX=7955 GN=dcakd PE=2 SV=1
contig_7dpi0018579	4.93457e-21	FEZF2_DANRE Fez family zinc finger protein 2 OS=Danio rerio OX=7955 GN=fezf2 PE=1 SV=2
contig_7dpi0032892	3.89318	RS7_TAKRU 40S ribosomal protein S7 OS=Takifugu rubripes OX=31033 GN=rps7 PE=3 SV=1
contig_7dpi0072964	0.175355	CYGB2_ORYLA Cytoglobin-2 OS=Oryzias latipes OX=8090 GN=cygb2 PE=2 SV=2
contig_7dpi0105853	1.17282	KDISB_DANRE Kinase D-interacting substrate of 220 kDa B OS=Danio rerio OX=7955 GN=kidins220b PE=1 SV=3
contig_7dpi0026463	1.062e-21	SHP2B_DANRE Phosphatidylinositol 3,4,5-trisphosphate 5-phosphatase 2B OS=Danio rerio OX=7955 GN=inppl1b PE=2 SV=1
contig_7dpi0033359	4.87576	AKIB1_DANRE Ankyrin repeat and IBR domain-containing protein 1 OS=Danio rerio OX=7955 GN=ankib1 PE=3 SV=1
contig_7dpi0108843	3.72078	MFSD5_DANRE Molybdate-anion transporter OS=Danio rerio OX=7955 GN=mfsd5 PE=2 SV=1
contig_7dpi0078732	4.42569	CNOT1_DANRE CCR4-NOT transcription complex subunit 1 OS=Danio rerio OX=7955 GN=cnot1 PE=2 SV=1
contig_7dpi0102255	0.2879	ST1S1_DANRE Cytosolic sulfotransferase 1 OS=Danio rerio OX=7955 GN=sult1st1 PE=1 SV=1
contig_7dpi0033844	2.67092	CPIN1_ONCMY Anamorsin OS=Oncorhynchus mykiss OX=8022 GN=ciapin1 PE=2 SV=1
contig_7dpi0049017	2.93375	MY9AB_DANRE Unconventional myosin-IXAb OS=Danio rerio OX=7955 GN=myo9ab PE=3 SV=3
contig_7dpi0084468	1.8311e-12	DNMBP_DANRE Dynamin-binding protein OS=Danio rerio OX=7955 GN=dnmbp PE=2 SV=1
contig_7dpi0029118	0.000698	OPTN_DANRE Optineurin OS=Danio rerio OX=7955 GN=optn PE=2 SV=2
contig_7dpi0043708	3.64561	TRBP2_DANRE RISC-loading complex subunit tarbp2 OS=Danio rerio OX=7955 GN=tarbp2 PE=2 SV=1
contig_7dpi0014630	4.13607e-14	AGK_DANRE Acylglycerol kinase, mitochondrial OS=Danio rerio OX=7955 GN=agk PE=2 SV=2
contig_7dpi0001399	5.02868	SEH1_DANRE Nucleoporin SEH1 OS=Danio rerio OX=7955 GN=seh1l PE=2 SV=2
contig_7dpi0078495	3.83146	HBBC_OPHSE Hemoglobin cathodic subunit beta OS=Ophisurus serpens OX=1234705 PE=1 SV=1
contig_7dpi0056545	2.0451	XPR1_DANRE Xenotropic and polytropic retrovirus receptor 1 homolog OS=Danio rerio OX=7955 GN=xpr1 PE=3 SV=1
contig_7dpi0038449	1.16172e-13	ZN12_MICSA Zinc finger protein ZFMSA12A OS=Micropterus salmoides OX=27706 PE=2 SV=1
contig_7dpi0023388	1.15645e-08	E4F1_DANRE Transcription factor E4F1 OS=Danio rerio OX=7955 GN=e4f1 PE=2 SV=1
contig_7dpi0007188		not available
contig_7dpi0046512	0.161022	NU3M_CARAU NADH-ubiquinone oxidoreductase chain 3 OS=Carassius auratus OX=7957 GN=MT-ND3 PE=3 SV=1
contig_7dpi0014229	2.75951	NPY_ICTPU Pro-neuropeptide Y OS=Ictalurus punctatus OX=7998 GN=npy PE=3 SV=1
contig_7dpi0075760	0.988583	HBB3_MURHE Hemoglobin subunit beta-3 OS=Muraena helena OX=46662 GN=hbb3 PE=1 SV=1
contig_7dpi0033594	0.530852	NIPLB_DANRE Nipped-B-like protein B OS=Danio rerio OX=7955 GN=nipblb PE=2 SV=1
contig_7dpi0109910	1.30629e-64	SZRD1_DANRE SUZ domain-containing protein 1 OS=Danio rerio OX=7955 GN=szrd1 PE=1 SV=1
contig_7dpi0039976	3.4881e-86	MSL1_DANRE Male-specific lethal 1-like 1 OS=Danio rerio OX=7955 GN=msl1l1 PE=2 SV=1
contig_7dpi0041196	3.26097	APMAP_SALSA Adipocyte plasma membrane-associated protein OS=Salmo salar OX=8030 GN=apmap PE=2 SV=1
contig_7dpi0027388	3.61016e-12	ANR52_DANRE Serine/threonine-protein phosphatase 6 regulatory ankyrin repeat subunit C OS=Danio rerio OX=7955 GN=ankrd52 PE=2 SV=1
contig_7dpi0081359	4.00182e-10	NPS4A_DANRE Neuronal PAS domain-containing protein 4A OS=Danio rerio OX=7955 GN=npas4a PE=2 SV=1
contig_7dpi0014799	2.14481	LNPA_TAKRU Endoplasmic reticulum junction formation protein lunapark-A OS=Takifugu rubripes OX=31033 GN=lnpka PE=3 SV=1
contig_7dpi0022210	2.59451e-08	SYEM_DANRE Probable glutamate--tRNA ligase, mitochondrial OS=Danio rerio OX=7955 GN=ears2 PE=2 SV=1
contig_7dpi0082640	0.000885557	COPB_DANRE Coatomer subunit beta OS=Danio rerio OX=7955 GN=copb1 PE=2 SV=1
contig_7dpi0050579	1.24934	HACE1_DANRE E3 ubiquitin-protein ligase HACE1 OS=Danio rerio OX=7955 GN=hace1 PE=3 SV=2
contig_7dpi0377160	1.62541	TBCE_DANRE Tubulin-specific chaperone E OS=Danio rerio OX=7955 GN=tbce PE=2 SV=2
contig_7dpi0126218	0.543814	STAC3_DANRE SH3 and cysteine-rich domain-containing protein 3 OS=Danio rerio OX=7955 GN=stac3 PE=1 SV=1
contig_7dpi0007503	7.0537e-19	DEN5B_DANRE DENN domain-containing protein 5B OS=Danio rerio OX=7955 GN=dennd5b PE=2 SV=2
contig_7dpi0110266		not available
contig_7dpi0196595	0.696394	RIPL2_DANRE RILP-like protein 2 OS=Danio rerio OX=7955 GN=rilpl2 PE=2 SV=2
contig_7dpi0007722	0.387287	ACES_DANRE Acetylcholinesterase OS=Danio rerio OX=7955 GN=ache PE=3 SV=1
contig_7dpi0057915	2.71108	TM39B_DANRE Transmembrane protein 39B OS=Danio rerio OX=7955 GN=tmem39b PE=2 SV=1
contig_7dpi0101527	7.67177e-05	IF2B3_DANRE Insulin-like growth factor 2 mRNA-binding protein 3 OS=Danio rerio OX=7955 GN=igf2bp3 PE=1 SV=1
contig_7dpi0016292	1.83542e-26	RHG29_DANRE Rho GTPase-activating protein 29 OS=Danio rerio OX=7955 GN=arhgap29 PE=2 SV=1
contig_7dpi0060748	4.48224e-63	ATP9B_DANRE Probable phospholipid-transporting ATPase IIB OS=Danio rerio OX=7955 GN=atp9b PE=3 SV=1
contig_7dpi0010371	7.17476e-19	MCA3A_DANRE Protein-methionine sulfoxide oxidase mical3a OS=Danio rerio OX=7955 GN=mical3a PE=2 SV=2
contig_7dpi0058635	1.77636	FYN_XIPHE Tyrosine-protein kinase Fyn OS=Xiphophorus helleri OX=8084 GN=fyn PE=2 SV=3
contig_7dpi0023443	1.94775e-67	GP183_SALSA G-protein coupled receptor 183 OS=Salmo salar OX=8030 GN=gpr183 PE=2 SV=1
contig_7dpi0018275	9.9495	COBL_DANRE Protein cordon-bleu OS=Danio rerio OX=7955 GN=cobl PE=1 SV=2
contig_7dpi0131549	3.17589e-35	AGRL4_DANRE Adhesion G protein-coupled receptor L4 OS=Danio rerio OX=7955 GN=adgrl4 PE=2 SV=2
contig_7dpi0017947	2.23192e-98	CO3_ONCMY Complement C3 (Fragment) OS=Oncorhynchus mykiss OX=8022 GN=c3 PE=1 SV=1
contig_7dpi0027344	1.56401e-06	SE1BA_DANRE Histone-lysine N-methyltransferase SETD1B-A OS=Danio rerio OX=7955 GN=setd1ba PE=1 SV=2
contig_7dpi0001040	3.12626e-41	RBM41_DANRE RNA-binding protein 4.1 OS=Danio rerio OX=7955 GN=rbm4.1 PE=1 SV=1
contig_7dpi0066660	5.53001e-113	PKHO1_DANRE Pleckstrin homology domain-containing family O member 1-A OS=Danio rerio OX=7955 GN=plekho1a PE=2 SV=2
contig_7dpi0025874	0	CARM1_DANRE Histone-arginine methyltransferase CARM1 OS=Danio rerio OX=7955 GN=carm1 PE=2 SV=1
contig_7dpi0038972	0.136596	MY9AA_DANRE Unconventional myosin-IXAa OS=Danio rerio OX=7955 GN=myo9aa PE=3 SV=1
contig_7dpi0038393	5.17406e-124	T7L1A_DANRE Transcription factor 7-like 1-A OS=Danio rerio OX=7955 GN=tcf7l1a PE=1 SV=1
contig_7dpi0032425	0.661688	EPB4B_DANRE Ephrin type-B receptor 4b OS=Danio rerio OX=7955 GN=ephb4b PE=2 SV=2
contig_7dpi0088079	8.64752e-10	VGFR3_DANRE Vascular endothelial growth factor receptor 3 OS=Danio rerio OX=7955 GN=flt4 PE=2 SV=1
contig_7dpi0057328	1.1386e-08	VIMB_CARAU Vimentin beta OS=Carassius auratus OX=7957 PE=2 SV=1
contig_7dpi0052588	0.122128	POC1B_DANRE POC1 centriolar protein homolog B OS=Danio rerio OX=7955 GN=poc1b PE=2 SV=1
contig_7dpi0005126	5.70042e-133	CHD8_DANRE Chromodomain-helicase-DNA-binding protein 8 OS=Danio rerio OX=7955 GN=chd8 PE=3 SV=2
contig_7dpi0029341	2.42073	SYVC_TAKRU Valine--tRNA ligase OS=Takifugu rubripes OX=31033 GN=vars PE=3 SV=1
contig_7dpi0002426	0.672638	CP2M1_ONCMY Cytochrome P450 2M1 OS=Oncorhynchus mykiss OX=8022 GN=cyp2m1 PE=1 SV=1
contig_7dpi0049294	9.2159	K1109_DANRE Transmembrane protein KIAA1109 homolog OS=Danio rerio OX=7955 GN=si:ch211-233a24.2 PE=3 SV=1
contig_7dpi0042006	1.59986	DDX46_DANRE Probable ATP-dependent RNA helicase DDX46 OS=Danio rerio OX=7955 GN=ddx46 PE=2 SV=1
contig_7dpi0018765	1.45363	CHM1B_DANRE Charged multivesicular body protein 1b OS=Danio rerio OX=7955 GN=chmp1b PE=2 SV=1
contig_7dpi0040971	0.010779	APAF_DANRE Apoptotic protease-activating factor 1 OS=Danio rerio OX=7955 GN=apaf1 PE=2 SV=1
contig_7dpi0133011	0.032789	KTU_DANRE Protein kintoun OS=Danio rerio OX=7955 GN=dnaaf2 PE=2 SV=1
contig_7dpi0113024	5.22627	KC15L_DANRE BTB/POZ domain-containing protein kctd15-like OS=Danio rerio OX=7955 GN=kctd15l PE=1 SV=1
contig_7dpi0089036	0.210424	EGR1_DANRE Early growth response protein 1 OS=Danio rerio OX=7955 GN=egr1 PE=2 SV=2
contig_7dpi0027647	2.07007	DEN5B_DANRE DENN domain-containing protein 5B OS=Danio rerio OX=7955 GN=dennd5b PE=2 SV=2
contig_7dpi0067166	3.73476e-42	S39A1_TAKRU Zinc transporter ZIP1 OS=Takifugu rubripes OX=31033 GN=slc39a1 PE=2 SV=1
contig_7dpi0053928	1.51367e-49	JMY_DANRE Junction-mediating and -regulatory protein OS=Danio rerio OX=7955 GN=jmy PE=2 SV=1
contig_7dpi0095885	4.12122	SOML_SIGGU Somatolactin OS=Siganus guttatus OX=92439 PE=2 SV=1
contig_7dpi0052683	0.451308	ABITM_DANRE Protein Abitram OS=Danio rerio OX=7955 GN=abitram PE=2 SV=1
contig_7dpi0012413	5.633e-105	DLLC_DANRE Delta-like protein C OS=Danio rerio OX=7955 GN=dlc PE=2 SV=1
contig_7dpi0057564	0.00790101	TRI13_DANRE Tripartite motif-containing 13 OS=Danio rerio OX=7955 GN=trim13 PE=2 SV=1
contig_7dpi0007637	0.00684465	PKHH1_DANRE Pleckstrin homology domain-containing family H member 1 OS=Danio rerio OX=7955 GN=plekhh1 PE=2 SV=1
contig_7dpi0079235	0.0466417	TRD7B_DANRE Tudor domain-containing protein 7B OS=Danio rerio OX=7955 GN=tdrd7b PE=3 SV=2
contig_7dpi0083753	0.0332445	PLPR1_DANRE Phospholipid phosphatase-related protein type 1 OS=Danio rerio OX=7955 GN=plppr1 PE=2 SV=1
contig_7dpi0151694	6.32677	PI4KB_DANRE Phosphatidylinositol 4-kinase beta OS=Danio rerio OX=7955 GN=pi4kb PE=2 SV=2
contig_7dpi0049802	0.723839	GP183_SALSA G-protein coupled receptor 183 OS=Salmo salar OX=8030 GN=gpr183 PE=2 SV=1
contig_7dpi0031754	1.21341	DESI2_DANRE Deubiquitinase DESI2 OS=Danio rerio OX=7955 GN=desi2 PE=2 SV=1
contig_7dpi0118883	0.145852	EFHC2_DANRE EF-hand domain-containing family member C2 OS=Danio rerio OX=7955 GN=efhc2 PE=2 SV=2
contig_7dpi0121402	9.75574e-81	FCHO2_DANRE F-BAR domain only protein 2 OS=Danio rerio OX=7955 GN=fcho2 PE=2 SV=1
contig_7dpi0009787	0	S12A3_PSEAM Solute carrier family 12 member 3 OS=Pseudopleuronectes americanus OX=8265 GN=slc12a3 PE=2 SV=1
contig_7dpi0130961	0.369929	LR2BP_DANRE LRP2-binding protein OS=Danio rerio OX=7955 GN=lrp2bp PE=2 SV=1
contig_7dpi0003683	8.23699e-139	TAB2_DANRE TGF-beta-activated kinase 1 and MAP3K7-binding protein 2 OS=Danio rerio OX=7955 GN=tab2 PE=1 SV=1
contig_7dpi0017954	3.59214	RTEL1_DANRE Regulator of telomere elongation helicase 1 OS=Danio rerio OX=7955 GN=rtel1 PE=3 SV=1
contig_7dpi0007645	4.53457	TEN3_DANRE Teneurin-3 OS=Danio rerio OX=7955 GN=tenm3 PE=2 SV=2
contig_7dpi0109616	0.499028	WDR81_DANRE WD repeat-containing protein 81 OS=Danio rerio OX=7955 GN=wdr81 PE=2 SV=1
contig_7dpi0002124	9.76323e-09	CLVS2_DANRE Clavesin-2 OS=Danio rerio OX=7955 GN=clvs2 PE=2 SV=1
contig_7dpi0017550	2.41982e-06	PABPA_DANRE Polyadenylate-binding protein 1A OS=Danio rerio OX=7955 GN=pabpc1a PE=1 SV=1
contig_7dpi0071104	1.40729	SPT5H_DANRE Transcription elongation factor SPT5 OS=Danio rerio OX=7955 GN=supt5h PE=1 SV=1
contig_7dpi0015666		not available
contig_7dpi0106432	4.08127e-45	RHOAC_DANRE Rho-related GTP-binding protein RhoA-C OS=Danio rerio OX=7955 GN=rhoac PE=1 SV=1
contig_7dpi0024927	2.70862e-13	RCOR2_DANRE REST corepressor 2 OS=Danio rerio OX=7955 GN=rcor2 PE=2 SV=1
contig_7dpi0022292	0.0123302	GDAP2_DANRE Ganglioside-induced differentiation-associated protein 2 OS=Danio rerio OX=7955 GN=gdap2 PE=2 SV=1
contig_7dpi0055719		not available
contig_7dpi0052430	0.914596	ACP7_DANRE Acid phosphatase type 7 OS=Danio rerio OX=7955 GN=acp7 PE=2 SV=1
contig_7dpi0052163	2.21737	MKRN1_TETNG Probable E3 ubiquitin-protein ligase makorin-1 OS=Tetraodon nigroviridis OX=99883 GN=mkrn1 PE=3 SV=1
contig_7dpi0228163	2.14749	PARN_DANRE Poly(A)-specific ribonuclease PARN OS=Danio rerio OX=7955 GN=parn PE=1 SV=2
contig_7dpi0154860	0.000116584	ABCB8_DANRE ATP-binding cassette sub-family B member 8, mitochondrial OS=Danio rerio OX=7955 GN=abcb8 PE=2 SV=1
contig_7dpi0031279	2.567	TONSL_DANRE Tonsoku-like protein OS=Danio rerio OX=7955 GN=tonsl PE=2 SV=1
contig_7dpi0053629	1.03037e-68	BRDT_DANRE Bromodomain testis-specific protein OS=Danio rerio OX=7955 GN=brdt PE=3 SV=2
contig_7dpi0187928		not available
contig_7dpi0095359	1.13852	PRTGA_DANRE Protogenin A OS=Danio rerio OX=7955 GN=prtga PE=2 SV=1
contig_7dpi0032778	0.00520369	VGFR4_DANRE Vascular endothelial growth factor receptor kdr-like OS=Danio rerio OX=7955 GN=kdrl PE=1 SV=1
contig_7dpi0032663	0	VGFR2_DANRE Vascular endothelial growth factor receptor 2 OS=Danio rerio OX=7955 GN=kdr PE=1 SV=2
contig_7dpi0055219	1.18938e-36	BRD9_DANRE Bromodomain-containing protein 9 OS=Danio rerio OX=7955 GN=brd9 PE=2 SV=1
contig_7dpi0041267	0.28072	MYD88_TAKRU Myeloid differentiation primary response protein MyD88 OS=Takifugu rubripes OX=31033 GN=myd88 PE=2 SV=1
contig_7dpi0085807	1.01252e-31	PO3F2_DANRE POU domain, class 3, transcription factor 2 OS=Danio rerio OX=7955 GN=pou3f2 PE=1 SV=1
contig_7dpi0012923	0.48075	DAAF3_DANRE Dynein assembly factor 3, axonemal OS=Danio rerio OX=7955 GN=dnaaf3 PE=2 SV=2
contig_7dpi0048153	0	NOTC1_DANRE Neurogenic locus notch homolog protein 1 OS=Danio rerio OX=7955 GN=notch1a PE=2 SV=1
contig_7dpi0023434	2.59979	ARSK_DANRE Arylsulfatase K OS=Danio rerio OX=7955 GN=arsk PE=2 SV=1
contig_7dpi0062524	0.229794	C166A_DANRE CD166 antigen homolog A OS=Danio rerio OX=7955 GN=alcama PE=1 SV=1
contig_7dpi0045113	0.0615974	RB3GP_DANRE Rab3 GTPase-activating protein catalytic subunit OS=Danio rerio OX=7955 GN=rab3gap1 PE=2 SV=2
contig_7dpi0007820	1.39798	PDE11_TAKRU Dual 3',5'-cyclic-AMP and -GMP phosphodiesterase 11A OS=Takifugu rubripes OX=31033 GN=pde11a PE=3 SV=1
contig_7dpi0084911	3.84047	FBXL5_SALSA F-box/LRR-repeat protein 5 OS=Salmo salar OX=8030 GN=fbxl5 PE=2 SV=1
contig_7dpi0007413	0.0106958	STXA_SYNHO Stonustoxin subunit alpha OS=Synanceia horrida OX=13279 PE=1 SV=3
contig_7dpi0003167	0	CELF2_DANRE CUGBP Elav-like family member 2 OS=Danio rerio OX=7955 GN=celf2 PE=2 SV=1
contig_7dpi0027242	1.81145	PLSL_DANRE Plastin-2 OS=Danio rerio OX=7955 GN=lcp1 PE=2 SV=1
contig_7dpi0092517	1.40448	JAG1B_DANRE Protein jagged-1b OS=Danio rerio OX=7955 GN=jag1b PE=2 SV=1
contig_7dpi0021811		not available
contig_7dpi0068968	0.821184	FBXL7_DANRE F-box/LRR-repeat protein 7 OS=Danio rerio OX=7955 GN=fbxl7 PE=2 SV=1
contig_7dpi0041188	1.72282	TRD7B_DANRE Tudor domain-containing protein 7B OS=Danio rerio OX=7955 GN=tdrd7b PE=3 SV=2
contig_7dpi0034987	9.69409e-20	ODO2_TAKRU Dihydrolipoyllysine-residue succinyltransferase component of 2-oxoglutarate dehydrogenase complex, mitochondrial (Fragment) OS=Takifugu rubripes OX=31033 GN=dlst PE=3 SV=1
contig_7dpi0031589	1.74371	PLE3_PSEAM Pleurocidin-like peptide WF3 OS=Pseudopleuronectes americanus OX=8265 GN=ple3 PE=3 SV=1
contig_7dpi0054012	8.95869	SC4AB_TAKRU Sodium channel protein type 4 subunit alpha B OS=Takifugu rubripes OX=31033 GN=scn4ab PE=3 SV=1
contig_7dpi0076623	1.42604	NLRC5_ICTPU Protein NLRC5 OS=Ictalurus punctatus OX=7998 GN=nlrc5 PE=2 SV=1
contig_7dpi0196213	0.709031	ASND1_DANRE Asparagine synthetase domain-containing protein 1 OS=Danio rerio OX=7955 GN=asnsd1 PE=2 SV=1
contig_7dpi0024212	1.63528	WNT1_DANRE Protein Wnt-1 OS=Danio rerio OX=7955 GN=wnt1 PE=2 SV=1
contig_7dpi0034373	1.48939e-21	ZN143_DANRE Zinc finger protein 143 OS=Danio rerio OX=7955 GN=znf143 PE=2 SV=2
contig_7dpi0059766	3.00365	LRMP_DANRE Lymphoid-restricted membrane protein OS=Danio rerio OX=7955 GN=lrmp PE=1 SV=2
contig_7dpi0029473	8.72692	EYS_DANRE Protein eyes shut homolog OS=Danio rerio OX=7955 GN=eys PE=1 SV=2
contig_7dpi0014800	0.923697	VIME_CYPCA Vimentin OS=Cyprinus carpio OX=7962 GN=vim PE=2 SV=1
contig_7dpi0086550	1.32508	BCL9L_DANRE B-cell CLL/lymphoma 9-like protein OS=Danio rerio OX=7955 GN=bcl9l PE=2 SV=1
contig_7dpi0064150	3.40182	SC4AA_TETNG Sodium channel protein type 4 subunit alpha A OS=Tetraodon nigroviridis OX=99883 GN=scn4aa PE=3 SV=2
contig_7dpi0031693	0.38642	TM263_DANRE Transmembrane protein 263 OS=Danio rerio OX=7955 GN=tmem263 PE=2 SV=1
contig_7dpi0050724		not available
contig_7dpi0087491	0.120603	LGR6_DANRE Leucine-rich repeat-containing G-protein coupled receptor 6 OS=Danio rerio OX=7955 GN=lgr6 PE=2 SV=1
contig_7dpi0011927	0.413011	L1CA1_DANRE Neural cell adhesion molecule L1.1 (Fragment) OS=Danio rerio OX=7955 GN=nadl1.1 PE=2 SV=1
contig_7dpi0050870	9.96266	ATG4B_DANRE Cysteine protease ATG4B OS=Danio rerio OX=7955 GN=atg4b PE=2 SV=2
contig_7dpi0021926	0.952565	CPTP_DANRE Ceramide-1-phosphate transfer protein OS=Danio rerio OX=7955 GN=cptp PE=2 SV=1
contig_7dpi0026791	0.516211	NSMF_DANRE NMDA receptor synaptonuclear signaling and neuronal migration factor OS=Danio rerio OX=7955 GN=nsmf PE=2 SV=1
contig_7dpi0068293	1.30809	GATC_TETNG Glutamyl-tRNA(Gln) amidotransferase subunit C, mitochondrial OS=Tetraodon nigroviridis OX=99883 GN=gatc PE=3 SV=1
contig_7dpi0050871	4.67852	RCN1_TAKRU Reticulocalbin-1 OS=Takifugu rubripes OX=31033 GN=rcn1 PE=3 SV=1
contig_7dpi0035848	6.93094e-18	RGL1_DANRE Ral guanine nucleotide dissociation stimulator-like 1 OS=Danio rerio OX=7955 GN=rgl1 PE=2 SV=1
contig_7dpi0005378	1.03965	DRL_DANRE Zinc finger protein draculin OS=Danio rerio OX=7955 GN=drl PE=2 SV=2
contig_7dpi0131012	1.74502	FAN1_DANRE Fanconi-associated nuclease 1 OS=Danio rerio OX=7955 GN=fan1 PE=2 SV=2
contig_7dpi0014066	0.0869257	ZN219_DANRE Zinc finger protein 219 OS=Danio rerio OX=7955 GN=znf219 PE=1 SV=2
contig_7dpi0068795	3.70461e-54	STXB_SYNVE Neoverrucotoxin subunit beta OS=Synanceia verrucosa OX=51996 PE=1 SV=1
contig_7dpi0121682	4.58355e-60	ORML3_DANRE ORM1-like protein 3 OS=Danio rerio OX=7955 GN=ormdl3 PE=2 SV=1
contig_7dpi0172843	0.680875	ULA1_DANRE NEDD8-activating enzyme E1 regulatory subunit OS=Danio rerio OX=7955 GN=nae1 PE=2 SV=2
contig_7dpi0029455		not available
contig_7dpi0115695	1.40264e-05	YES_DANRE Tyrosine-protein kinase yes OS=Danio rerio OX=7955 GN=yes1 PE=1 SV=1
contig_7dpi0011723	1.69725e-80	GNAI1_ORYLA Guanine nucleotide-binding protein G(i) subunit alpha-1 OS=Oryzias latipes OX=8090 GN=gnai1 PE=2 SV=3
contig_7dpi0048476	3.24519	C3AR_DANRE C3a anaphylatoxin chemotactic receptor OS=Danio rerio OX=7955 GN=c3ar1 PE=3 SV=1
contig_7dpi0136316	2.03379	MEG10_DANRE Multiple epidermal growth factor-like domains protein 10 OS=Danio rerio OX=7955 GN=megf10 PE=1 SV=1
contig_7dpi0036473	0.920151	ASSY_DANRE Argininosuccinate synthase OS=Danio rerio OX=7955 GN=ass1 PE=2 SV=1
contig_7dpi0041038	3.48206e-153	L3BPB_DANRE Galectin-3-binding protein B OS=Danio rerio OX=7955 GN=lgals3bpb PE=2 SV=1
contig_7dpi0044749	0.000832109	GDAP2_DANRE Ganglioside-induced differentiation-associated protein 2 OS=Danio rerio OX=7955 GN=gdap2 PE=2 SV=1
contig_7dpi0034480	0.087786	TRIO_DANRE Triple functional domain protein OS=Danio rerio OX=7955 GN=trio PE=3 SV=1
contig_7dpi0033458	2.28667e-15	FMNL3_DANRE Formin-like protein 3 OS=Danio rerio OX=7955 GN=fmnl3 PE=2 SV=2
contig_7dpi0074175	1.87744	LNPB_TAKRU Endoplasmic reticulum junction formation protein lunapark-B OS=Takifugu rubripes OX=31033 GN=lnpkb PE=3 SV=1
contig_7dpi0017542	0.251681	CRA1A_DANRE Collagen alpha-1(XXVII) chain A OS=Danio rerio OX=7955 GN=col27a1a PE=2 SV=1
contig_7dpi0088181	1.50615	DALD3_DANRE DALR anticodon-binding domain-containing protein 3 OS=Danio rerio OX=7955 GN=dalrd3 PE=2 SV=1
contig_7dpi0024053	4.72812	NGDN_DANRE Neuroguidin OS=Danio rerio OX=7955 GN=ngdn PE=2 SV=1
contig_7dpi0038348	5.4922	ADA1A_ORYLA Alpha-1A adrenergic receptor OS=Oryzias latipes OX=8090 GN=adra1a PE=3 SV=1
contig_7dpi0039838	1.21702	R213B_DANRE E3 ubiquitin-protein ligase rnf213-beta OS=Danio rerio OX=7955 GN=rnf213b PE=3 SV=1
contig_7dpi0154859	1.1084e-06	ABCB8_DANRE ATP-binding cassette sub-family B member 8, mitochondrial OS=Danio rerio OX=7955 GN=abcb8 PE=2 SV=1
contig_7dpi0082790	0.5306	VGFR2_DANRE Vascular endothelial growth factor receptor 2 OS=Danio rerio OX=7955 GN=kdr PE=1 SV=2
contig_7dpi0087520	9.17047e-15	GRT1A_DANRE Growth hormone-regulated TBC protein 1-A OS=Danio rerio OX=7955 GN=grtp1a PE=2 SV=1
contig_7dpi0006933	1.7655e-57	MYSS_CYPCA Myosin heavy chain, fast skeletal muscle OS=Cyprinus carpio OX=7962 PE=2 SV=2
contig_7dpi0023513	1.85936e-06	SRBP2_DANRE Sterol regulatory element-binding protein 2 OS=Danio rerio OX=7955 GN=srebf2 PE=2 SV=1
contig_7dpi0021395	8.82324e-22	PLPR1_DANRE Phospholipid phosphatase-related protein type 1 OS=Danio rerio OX=7955 GN=plppr1 PE=2 SV=1
contig_7dpi0095954	0	HACE1_DANRE E3 ubiquitin-protein ligase HACE1 OS=Danio rerio OX=7955 GN=hace1 PE=3 SV=2
contig_7dpi0048750	3.66962	CMAH_DANRE Cytidine monophosphate-N-acetylneuraminic acid hydroxylase OS=Danio rerio OX=7955 GN=cmah PE=2 SV=1
contig_7dpi0113340	0.185383	DVR1_DANRE Protein DVR-1 OS=Danio rerio OX=7955 GN=dvr1 PE=2 SV=1
contig_7dpi0021945	1.49343	IF4EA_DANRE Eukaryotic translation initiation factor 4E-1A OS=Danio rerio OX=7955 GN=eif4e1a PE=1 SV=1
contig_7dpi0095978	0.735669	K1109_DANRE Transmembrane protein KIAA1109 homolog OS=Danio rerio OX=7955 GN=si:ch211-233a24.2 PE=3 SV=1
contig_7dpi0042905	3.14619	T132E_DANRE Transmembrane protein 132E OS=Danio rerio OX=7955 GN=tmem132e PE=2 SV=1
contig_7dpi0058672	1.71826e-76	MOCS3_DANRE Adenylyltransferase and sulfurtransferase MOCS3 OS=Danio rerio OX=7955 GN=mocs3 PE=2 SV=1
contig_7dpi0006791	0.894204	CRCM1_DANRE Calcium release-activated calcium channel protein 1 OS=Danio rerio OX=7955 GN=orai1 PE=2 SV=2
contig_7dpi0024379	9.88237	GRID2_DANRE Glutamate receptor ionotropic, delta-2 OS=Danio rerio OX=7955 GN=grid2 PE=2 SV=1
contig_7dpi0025301	0	NCKP1_DANRE Nck-associated protein 1 OS=Danio rerio OX=7955 GN=nckap1 PE=3 SV=1
contig_7dpi0108218	1.2862	H6ST2_DANRE Heparan-sulfate 6-O-sulfotransferase 2 OS=Danio rerio OX=7955 GN=hs6st2 PE=2 SV=2
contig_7dpi0073001	1.60551	EPD2_ONCMY Ependymin-2 OS=Oncorhynchus mykiss OX=8022 GN=epd2 PE=2 SV=1
contig_7dpi0021703	3.47594	ASAH2_DANRE Neutral ceramidase OS=Danio rerio OX=7955 GN=asah2 PE=1 SV=1
contig_7dpi0037828	0.786851	INT11_DANRE Integrator complex subunit 11 OS=Danio rerio OX=7955 GN=cpsf3l PE=2 SV=1
contig_7dpi0088501	2.77534	SZ12B_DANRE Polycomb protein suz12-B OS=Danio rerio OX=7955 GN=suz12b PE=2 SV=1
contig_7dpi0030126	6.63278e-123	DNM1L_DANRE Dynamin-1-like protein OS=Danio rerio OX=7955 GN=dnm1l PE=2 SV=1
contig_7dpi0039769	2.73022e-80	ATP9B_DANRE Probable phospholipid-transporting ATPase IIB OS=Danio rerio OX=7955 GN=atp9b PE=3 SV=1
contig_7dpi0079447	0.769381	METRL_DANRE Meteorin-like protein OS=Danio rerio OX=7955 GN=metrnl PE=2 SV=1
contig_7dpi0002387	9.56992e-10	LARP7_DANRE La-related protein 7 OS=Danio rerio OX=7955 GN=larp7 PE=2 SV=1
contig_7dpi0043591	1.46477e-30	CDK2_CARAU Cyclin-dependent kinase 2 OS=Carassius auratus OX=7957 GN=cdk2 PE=1 SV=1
contig_7dpi0021955	1.21932e-05	ILRUN_DANRE Protein ILRUN OS=Danio rerio OX=7955 GN=ilrun PE=2 SV=1
contig_7dpi0244970	1.1049	PI4KB_DANRE Phosphatidylinositol 4-kinase beta OS=Danio rerio OX=7955 GN=pi4kb PE=2 SV=2
contig_7dpi0002889	3.03232e-10	ABCB8_DANRE ATP-binding cassette sub-family B member 8, mitochondrial OS=Danio rerio OX=7955 GN=abcb8 PE=2 SV=1
contig_7dpi0187255	1.22153	PRTGB_DANRE Protogenin B (Fragment) OS=Danio rerio OX=7955 GN=prtgb PE=2 SV=1
contig_7dpi0085560	0.00234601	CO9_TAKRU Complement component C9 OS=Takifugu rubripes OX=31033 GN=c9 PE=3 SV=1
contig_7dpi0084392	0.478022	MP2K6_DANRE Dual specificity mitogen-activated protein kinase kinase 6 OS=Danio rerio OX=7955 GN=map2k6 PE=1 SV=2
contig_7dpi0038492	2.54992e-128	KC2D1_DANRE Calcium/calmodulin-dependent protein kinase type II delta 1 chain OS=Danio rerio OX=7955 GN=camk2d1 PE=2 SV=2
contig_7dpi0001090	3.68591e-05	HACE1_DANRE E3 ubiquitin-protein ligase HACE1 OS=Danio rerio OX=7955 GN=hace1 PE=3 SV=2
contig_7dpi0037763	1.91983e-08	MCA3A_DANRE Protein-methionine sulfoxide oxidase mical3a OS=Danio rerio OX=7955 GN=mical3a PE=2 SV=2
contig_7dpi0044481	1.96707e-24	PRDM9_DANRE Histone-lysine N-methyltransferase PRDM9 OS=Danio rerio OX=7955 GN=prdm9 PE=2 SV=1
contig_7dpi0088713	0.266081	TERA_DANRE Transitional endoplasmic reticulum ATPase OS=Danio rerio OX=7955 GN=vcp PE=1 SV=1
contig_7dpi0073528	0.706761	SELM_DANRE Selenoprotein M OS=Danio rerio OX=7955 GN=Selenom PE=2 SV=2
contig_7dpi0097018	4.53243e-68	PTPRF_DANRE Receptor-type tyrosine-protein phosphatase F OS=Danio rerio OX=7955 GN=ptprf PE=2 SV=1
contig_7dpi0036142	2.16155	PLXA4_DANRE Plexin-A4 OS=Danio rerio OX=7955 GN=plxna4 PE=2 SV=1
contig_7dpi0000018	1.8945	PSMG1_DANRE Proteasome assembly chaperone 1 OS=Danio rerio OX=7955 GN=psmg1 PE=2 SV=1
contig_7dpi0001675	2.49876	MIA40_DANRE Mitochondrial intermembrane space import and assembly protein 40 OS=Danio rerio OX=7955 GN=chchd4 PE=2 SV=1
contig_7dpi0013469	2.2475	HXCCB_DANRE Homeobox protein Hox-C12b OS=Danio rerio OX=7955 GN=hoxc12b PE=2 SV=1
contig_7dpi0010296	1.08732	MSL1_DANRE Male-specific lethal 1-like 1 OS=Danio rerio OX=7955 GN=msl1l1 PE=2 SV=1
contig_7dpi0014199	7.33769	INT6_DANRE Integrator complex subunit 6 OS=Danio rerio OX=7955 GN=ints6 PE=2 SV=1
contig_7dpi0039106	8.11685e-111	SMUF2_DANRE E3 ubiquitin-protein ligase SMURF2 OS=Danio rerio OX=7955 GN=smurf2 PE=2 SV=1
contig_7dpi0049306	0.358008	XIRP1_DANRE Xin actin-binding repeat-containing protein 1 OS=Danio rerio OX=7955 GN=xirp1 PE=1 SV=1
contig_7dpi0015983	0.177801	CALRL_ONCGO Calcitonin gene-related peptide type 1 receptor OS=Oncorhynchus gorbuscha OX=8017 GN=calcrl PE=2 SV=1
contig_7dpi0045005	0.155838	GALC_DANRE Galactocerebrosidase OS=Danio rerio OX=7955 GN=galc PE=2 SV=1
contig_7dpi0075914	0	KAT2A_DANRE Histone acetyltransferase KAT2A OS=Danio rerio OX=7955 GN=kat2a PE=2 SV=1
contig_7dpi0103657	4.63777	NPS4L_DANRE Neuronal PAS domain-containing protein 4-like OS=Danio rerio OX=7955 GN=npas4l PE=2 SV=1
contig_7dpi0040568	0	FCHO2_DANRE F-BAR domain only protein 2 OS=Danio rerio OX=7955 GN=fcho2 PE=2 SV=1
contig_7dpi0113026	3.68738	ES1_DANRE ES1 protein, mitochondrial OS=Danio rerio OX=7955 GN=es1 PE=1 SV=2
contig_7dpi0018270	1.93376e-05	DRL_DANRE Zinc finger protein draculin OS=Danio rerio OX=7955 GN=drl PE=2 SV=2
contig_7dpi0042333	0.21873	CF089_DANRE Bombesin receptor-activated protein C6orf89 homolog OS=Danio rerio OX=7955 GN=zgc:162255 PE=2 SV=1
contig_7dpi0037064	3.39473	PUA1A_SALSA Adenylosuccinate synthetase isozyme 1 A OS=Salmo salar OX=8030 GN=adss1a PE=2 SV=1
contig_7dpi0167688	1.73945	CP19A_ANGJA Aromatase OS=Anguilla japonica OX=7937 GN=cyp19a1 PE=2 SV=1
contig_7dpi0030918	0.850291	LOX3A_DANRE Lysyl oxidase homolog 3A OS=Danio rerio OX=7955 GN=loxl3a PE=2 SV=1
contig_7dpi0019474	0.000607795	FBXL5_DANRE F-box/LRR-repeat protein 5 OS=Danio rerio OX=7955 GN=fbxl5 PE=2 SV=2
contig_7dpi0015756	4.78023e-110	THB_DANRE Thyroid hormone receptor beta OS=Danio rerio OX=7955 GN=thrb PE=1 SV=2
contig_7dpi0002228	4.21012e-52	LAMB4_DANRE Laminin subunit beta-4 OS=Danio rerio OX=7955 GN=lamb4 PE=2 SV=1
contig_7dpi0021753	1.92067e-08	ANR29_DANRE Ankyrin repeat domain-containing protein 29 OS=Danio rerio OX=7955 GN=ankrd29 PE=2 SV=1
contig_7dpi0057243	5.34343e-07	GARL3_DANRE GTPase-activating Rap/Ran-GAP domain-like protein 3 OS=Danio rerio OX=7955 GN=garnl3 PE=3 SV=1
[truncated: 4,093 more rows]

## Sheet: Head kidney_Cluster2
Cluster 2	Lowest E-value	Description
contig_7dpi0027862	1.24398e-28	HBA4_ONCMY Hemoglobin subunit alpha-4 OS=Oncorhynchus mykiss OX=8022 GN=hba4 PE=1 SV=1
contig_7dpi0038650	3.15948e-20	HBB_SALSA Hemoglobin subunit beta OS=Salmo salar OX=8030 GN=hbb PE=2 SV=3
contig_7dpi0000273	1.76696e-49	HBB_SALSA Hemoglobin subunit beta OS=Salmo salar OX=8030 GN=hbb PE=2 SV=3
contig_7dpi0000102	2.16629	CATD_CLUHA Cathepsin D OS=Clupea harengus OX=7950 GN=ctsd PE=1 SV=1
contig_7dpi0006816	1.92212e-46	HBB1_ONCMY Hemoglobin subunit beta-1 OS=Oncorhynchus mykiss OX=8022 GN=hbb1 PE=1 SV=1
contig_7dpi0042617	1.44523e-35	HBA_SALSA Hemoglobin subunit alpha OS=Salmo salar OX=8030 GN=hba PE=2 SV=2
contig_7dpi0000168	4.9471e-66	HBB1_ONCMY Hemoglobin subunit beta-1 OS=Oncorhynchus mykiss OX=8022 GN=hbb1 PE=1 SV=1
contig_7dpi0000303	8.72286e-28	HBB_ONCNE Hemoglobin subunit beta OS=Oncorhynchus nerka OX=8023 GN=hbb PE=2 SV=3
contig_7dpi0000199	5.71112e-37	HBB1_ONCMY Hemoglobin subunit beta-1 OS=Oncorhynchus mykiss OX=8022 GN=hbb1 PE=1 SV=1
contig_7dpi0000029	1.00938e-08	HBB4_ONCMY Hemoglobin subunit beta-4 OS=Oncorhynchus mykiss OX=8022 GN=hbb4 PE=1 SV=3
contig_7dpi0266681	0.964011	AMER1_DANRE APC membrane recruitment protein 1 OS=Danio rerio OX=7955 GN=amer1 PE=2 SV=1
contig_7dpi0199493	1.59733	LIN54_DANRE Protein lin-54 homolog OS=Danio rerio OX=7955 GN=lin54 PE=1 SV=1
contig_7dpi0000429	2.45763	CE030_DANRE UNC119-binding protein C5orf30 homolog OS=Danio rerio OX=7955 GN=zgc:194273 PE=2 SV=1
contig_7dpi0265683	1.6325e-32	CYB_ONCMY Cytochrome b OS=Oncorhynchus mykiss OX=8022 GN=mt-cyb PE=3 SV=1
contig_7dpi0000547	2.14057e-127	RL9_ICTPU 60S ribosomal protein L9 OS=Ictalurus punctatus OX=7998 GN=rpl9 PE=2 SV=1
contig_7dpi0000085	6.30516e-85	HBA1_ONCMY Hemoglobin subunit alpha-1 OS=Oncorhynchus mykiss OX=8022 GN=hba1 PE=1 SV=1
contig_7dpi0002146	5.75087e-10	FRIH_SALSA Ferritin, heavy subunit OS=Salmo salar OX=8030 PE=2 SV=1
contig_7dpi0000084	2.80502e-68	HCE1_ORYLA High choriolytic enzyme 1 OS=Oryzias latipes OX=8090 GN=hcea PE=1 SV=1
contig_7dpi0000067	0	COX1_SALSA Cytochrome c oxidase subunit 1 OS=Salmo salar OX=8030 GN=mt-co1 PE=3 SV=1
contig_7dpi0209793	0.278744	L2GL2_DANRE LLGL scribble cell polarity complex component 2 OS=Danio rerio OX=7955 GN=llgl2 PE=1 SV=1
contig_7dpi0488596	7.70026e-18	RS24_ORYLA 40S ribosomal protein S24 OS=Oryzias latipes OX=8090 GN=rps24 PE=2 SV=1
contig_7dpi0291299	5.58069	KAT2B_DANRE Histone acetyltransferase KAT2B OS=Danio rerio OX=7955 GN=kat2b PE=2 SV=1
contig_7dpi0000456	8.24474e-20	MMP21_DANRE Matrix metallopeptidase-21 OS=Danio rerio OX=7955 GN=mmp21 PE=2 SV=2
contig_7dpi0040829	1.16389e-14	HBA1_ONCMY Hemoglobin subunit alpha-1 OS=Oncorhynchus mykiss OX=8022 GN=hba1 PE=1 SV=1
contig_7dpi0000537	2.38283e-30	HBB1_ONCMY Hemoglobin subunit beta-1 OS=Oncorhynchus mykiss OX=8022 GN=hbb1 PE=1 SV=1
contig_7dpi0002084	6.93012	PRKRA_DANRE Interferon-inducible double-stranded RNA-dependent protein kinase activator A homolog OS=Danio rerio OX=7955 GN=prkra PE=2 SV=2
contig_7dpi0000418	1.54273e-167	RSSA_SALSA 40S ribosomal protein SA OS=Salmo salar OX=8030 GN=rpsa PE=2 SV=1
contig_7dpi0000478	1.55946e-128	FRIH_SALSA Ferritin, heavy subunit OS=Salmo salar OX=8030 PE=2 SV=1
contig_7dpi0104921	1.08557e-14	RL23_ICTPU 60S ribosomal protein L23 OS=Ictalurus punctatus OX=7998 GN=rpl23 PE=2 SV=2
contig_7dpi0282984	0.104991	SYVC_TAKRU Valine--tRNA ligase OS=Takifugu rubripes OX=31033 GN=vars PE=3 SV=1
contig_7dpi0001772	1.48956e-13	TYB12_ONCMY Thymosin beta-12 OS=Oncorhynchus mykiss OX=8022 PE=1 SV=2
contig_7dpi0000715	1.82421e-42	RS8_DANRE 40S ribosomal protein S8 OS=Danio rerio OX=7955 GN=rps8 PE=2 SV=2
contig_7dpi0104995	4.24776e-13	CYB_SALSA Cytochrome b OS=Salmo salar OX=8030 GN=mt-cyb PE=3 SV=1
contig_7dpi0000030	1.22115e-07	HBB4_ONCMY Hemoglobin subunit beta-4 OS=Oncorhynchus mykiss OX=8022 GN=hbb4 PE=1 SV=3
contig_7dpi0001087	4.07758	CCNF_DANRE Cyclin-F OS=Danio rerio OX=7955 GN=ccnf PE=2 SV=1
contig_7dpi0001088	8.45778e-14	H6_ONCMY Non-histone chromosomal protein H6 OS=Oncorhynchus mykiss OX=8022 PE=1 SV=2
contig_7dpi0000541	2.75837e-34	MUCM_ICTPU Ig mu chain C region membrane-bound form OS=Ictalurus punctatus OX=7998 PE=2 SV=2
contig_7dpi0000101	2.85558e-143	ACTB_SALSA Actin, cytoplasmic 1 OS=Salmo salar OX=8030 GN=actb PE=2 SV=1
contig_7dpi0149776	1.34855e-18	RS7_ICTPU 40S ribosomal protein S7 OS=Ictalurus punctatus OX=7998 GN=rps7 PE=2 SV=1
contig_7dpi0000794	1.98692e-15	H6_ONCMY Non-histone chromosomal protein H6 OS=Oncorhynchus mykiss OX=8022 PE=1 SV=2
contig_7dpi0000290	2.19956e-12	TYB11_ONCMY Thymosin beta-11 OS=Oncorhynchus mykiss OX=8022 PE=1 SV=2
contig_7dpi0001417	1.28936e-79	RL30_ICTPU 60S ribosomal protein L30 OS=Ictalurus punctatus OX=7998 GN=rpl30 PE=3 SV=2
contig_7dpi0000284	5.51195e-94	RS17_ICTPU 40S ribosomal protein S17 OS=Ictalurus punctatus OX=7998 GN=rps17 PE=2 SV=3
contig_7dpi0117382	2.27986e-29	RS24_TAKRU 40S ribosomal protein S24 OS=Takifugu rubripes OX=31033 GN=rps24 PE=3 SV=1
contig_7dpi0000108	1.08354	EFNMT_DANRE eEF1A lysine and N-terminal methyltransferase OS=Danio rerio OX=7955 GN=eef1aknmt PE=2 SV=1
contig_7dpi0000239	0.578741	CAMKV_DANRE CaM kinase-like vesicle-associated protein OS=Danio rerio OX=7955 GN=camkv PE=2 SV=2
contig_7dpi0002070	3.4793e-14	RBMX_DANRE RNA-binding motif protein, X chromosome OS=Danio rerio OX=7955 GN=rbmx PE=2 SV=1
contig_7dpi0150442	2.35162e-32	RL36A_TAKRU 60S ribosomal protein L36a OS=Takifugu rubripes OX=31033 GN=rpl36a PE=3 SV=2
contig_7dpi0285534	1.03395e-22	RS12_ORENI 40S ribosomal protein S12 OS=Oreochromis niloticus OX=8128 GN=rps12 PE=2 SV=3
contig_7dpi0004107	0.1647	TWS1B_DANRE Twisted gastrulation protein homolog 1-B OS=Danio rerio OX=7955 GN=twsg1b PE=2 SV=1
contig_7dpi0002147	8.0017e-54	RL18_ORENI 60S ribosomal protein L18 OS=Oreochromis niloticus OX=8128 GN=rpl18 PE=2 SV=2
contig_7dpi0002865	0.938874	SAMH1_DANRE Deoxynucleoside triphosphate triphosphohydrolase SAMHD1 OS=Danio rerio OX=7955 GN=samhd1 PE=2 SV=2
contig_7dpi0001587	2.56391e-21	HBB_SALSA Hemoglobin subunit beta OS=Salmo salar OX=8030 GN=hbb PE=2 SV=3
contig_7dpi0002024	1.36021e-63	RL24_GILMI 60S ribosomal protein L24 OS=Gillichthys mirabilis OX=8222 GN=rpl24 PE=2 SV=2
contig_7dpi0274137	2.30358	TRIO_DANRE Triple functional domain protein OS=Danio rerio OX=7955 GN=trio PE=3 SV=1
contig_7dpi0000259	4.22146e-45	RS25_DANRE 40S ribosomal protein S25 OS=Danio rerio OX=7955 GN=rps25 PE=2 SV=1
contig_7dpi0160091	4.47144e-06	HBA4_ONCMY Hemoglobin subunit alpha-4 OS=Oncorhynchus mykiss OX=8022 GN=hba4 PE=1 SV=1
contig_7dpi0000093	1.91096	NPS4A_DANRE Neuronal PAS domain-containing protein 4A OS=Danio rerio OX=7955 GN=npas4a PE=2 SV=1
contig_7dpi0233990	1.54526e-32	RS6_ONCMY 40S ribosomal protein S6 OS=Oncorhynchus mykiss OX=8022 GN=rps6 PE=2 SV=1
contig_7dpi0000580	3.3516e-86	RS27A_ICTPU Ubiquitin-40S ribosomal protein S27a OS=Ictalurus punctatus OX=7998 GN=rps27a PE=2 SV=2
contig_7dpi0188258	1.47706e-07	RS30_ORYLA 40S ribosomal protein S30 OS=Oryzias latipes OX=8090 GN=fau PE=3 SV=2
contig_7dpi0004014	2.36529e-91	FRIH_SALSA Ferritin, heavy subunit OS=Salmo salar OX=8030 PE=2 SV=1
contig_7dpi0000594	8.93031e-66	RL15_PARDA 60S ribosomal protein L15 OS=Paramisgurnus dabryanus OX=90735 GN=rpl15 PE=2 SV=3
contig_7dpi0000439	3.60487e-70	RL35A_ICTPU 60S ribosomal protein L35a OS=Ictalurus punctatus OX=7998 GN=rpl35a PE=3 SV=1
contig_7dpi0000129	9.30387e-30	ACTB3_TAKRU Actin, cytoplasmic 3 OS=Takifugu rubripes OX=31033 GN=actbc PE=2 SV=1
contig_7dpi0001940	5.55792e-36	RS27A_ICTPU Ubiquitin-40S ribosomal protein S27a OS=Ictalurus punctatus OX=7998 GN=rps27a PE=2 SV=2
contig_7dpi0074289	0.347194	CLPT1_DANRE Cleft lip and palate transmembrane protein 1 homolog OS=Danio rerio OX=7955 GN=clptm1 PE=2 SV=1
contig_7dpi0001169	2.03492	GLCEB_DANRE D-glucuronyl C5-epimerase B OS=Danio rerio OX=7955 GN=glceb PE=1 SV=1
contig_7dpi0240012	0.231683	HISAT_SCOAU Histidine N-acetyltransferase OS=Scomber australasicus OX=29150 GN=hisat PE=1 SV=1
contig_7dpi0000460	9.22134e-71	RL35A_ICTPU 60S ribosomal protein L35a OS=Ictalurus punctatus OX=7998 GN=rpl35a PE=3 SV=1
contig_7dpi0349124	0.224573	E2F8_DANRE Transcription factor E2F8 OS=Danio rerio OX=7955 GN=e2f8 PE=3 SV=1
contig_7dpi0000052	0.000153794	TWF2_DANRE Twinfilin-2 OS=Danio rerio OX=7955 GN=twf2 PE=2 SV=1
contig_7dpi0002043	1.15561e-49	RS18_ICTPU 40S ribosomal protein S18 OS=Ictalurus punctatus OX=7998 GN=rps18 PE=2 SV=1
contig_7dpi0001350	7.39695e-64	RL24_GILMI 60S ribosomal protein L24 OS=Gillichthys mirabilis OX=8222 GN=rpl24 PE=2 SV=2
contig_7dpi0000602	2.03111e-20	CWC27_DANRE Spliceosome-associated protein CWC27 homolog OS=Danio rerio OX=7955 GN=cwc27 PE=2 SV=1
contig_7dpi0002803	1.79061e-60	TBA_ONCKE Tubulin alpha chain OS=Oncorhynchus keta OX=8018 PE=2 SV=2
contig_7dpi0000532	0.701781	MAD3_DANRE Max dimerization protein 3 OS=Danio rerio OX=7955 GN=mxd3 PE=2 SV=1
contig_7dpi0124155	7.79003e-07	HBB1_ONCMY Hemoglobin subunit beta-1 OS=Oncorhynchus mykiss OX=8022 GN=hbb1 PE=1 SV=1
contig_7dpi0003439	1.68584	TM248_DANRE Transmembrane protein 248 OS=Danio rerio OX=7955 GN=tmem248 PE=2 SV=1
contig_7dpi0339084	0.520701	MTU1_DANRE Mitochondrial tRNA-specific 2-thiouridylase 1 OS=Danio rerio OX=7955 GN=trmu PE=2 SV=1
contig_7dpi0001925	1.23025	SAAL1_DANRE Protein saal1 OS=Danio rerio OX=7955 GN=saal1 PE=2 SV=2
contig_7dpi0001260	6.05455e-48	TRY3_SALSA Trypsin-3 (Fragment) OS=Salmo salar OX=8030 PE=1 SV=1
contig_7dpi0206563	1.38637e-26	RL27_ICTPU 60S ribosomal protein L27 OS=Ictalurus punctatus OX=7998 GN=rpl27 PE=2 SV=3
contig_7dpi0000718	1.04126e-32	RS28_ICTPU 40S ribosomal protein S28 OS=Ictalurus punctatus OX=7998 GN=rps28 PE=3 SV=1
contig_7dpi0337891	1.03005e-06	MCA3A_DANRE Protein-methionine sulfoxide oxidase mical3a OS=Danio rerio OX=7955 GN=mical3a PE=2 SV=2
contig_7dpi0318908	2.73714e-28	RS4_ICTPU 40S ribosomal protein S4 OS=Ictalurus punctatus OX=7998 GN=rps4 PE=2 SV=3
contig_7dpi0001351	0.0823315	GLYR1_DANRE Putative oxidoreductase GLYR1 OS=Danio rerio OX=7955 GN=glyr1 PE=2 SV=1
contig_7dpi0045323	1.88074e-32	HBA4_ONCMY Hemoglobin subunit alpha-4 OS=Oncorhynchus mykiss OX=8022 GN=hba4 PE=1 SV=1
contig_7dpi0000232	1.26011e-41	RS25_DANRE 40S ribosomal protein S25 OS=Danio rerio OX=7955 GN=rps25 PE=2 SV=1
contig_7dpi0158618	1.38681	A9A1A_DANRE 4-trimethylaminobutyraldehyde dehydrogenase A OS=Danio rerio OX=7955 GN=aldh9a1a PE=2 SV=1
contig_7dpi0203765	0.0174978	MYLIA_DANRE E3 ubiquitin-protein ligase MYLIP-A OS=Danio rerio OX=7955 GN=mylipa PE=1 SV=2
contig_7dpi0092259	6.21341e-09	HBA1_ONCMY Hemoglobin subunit alpha-1 OS=Oncorhynchus mykiss OX=8022 GN=hba1 PE=1 SV=1
contig_7dpi0001365	3.005e-65	FRIMS_PSEBE Ferritin, spleen middle subunit OS=Pseudotrematomus bernacchii OX=40690 PE=1 SV=1
contig_7dpi0001041	5.42722	LYPD6_DANRE Ly6/PLAUR domain-containing protein 6 OS=Danio rerio OX=7955 GN=lypd6 PE=1 SV=1
contig_7dpi0140645	0.367801	OLF3A_DANRE Olfactomedin-like protein 3A OS=Danio rerio OX=7955 GN=olfml3a PE=2 SV=2
contig_7dpi0002096	2.44215e-12	GPX8_DANRE Probable glutathione peroxidase 8 OS=Danio rerio OX=7955 GN=gpx8 PE=2 SV=1
contig_7dpi0219868	6.50779e-18	RS29_HIPCM 40S ribosomal protein S29 OS=Hippocampus comes OX=109280 GN=rps29 PE=3 SV=3
contig_7dpi0161429	3.5274e-17	RL23_ICTPU 60S ribosomal protein L23 OS=Ictalurus punctatus OX=7998 GN=rpl23 PE=2 SV=2
contig_7dpi0238696	4.99935e-14	HBA4_ONCMY Hemoglobin subunit alpha-4 OS=Oncorhynchus mykiss OX=8022 GN=hba4 PE=1 SV=1
contig_7dpi0080573	1.95386e-29	RS7_TAKRU 40S ribosomal protein S7 OS=Takifugu rubripes OX=31033 GN=rps7 PE=3 SV=1
contig_7dpi0000014	3.53271	ITR_CATCO Isotocin receptor OS=Catostomus commersonii OX=7971 PE=2 SV=1
contig_7dpi0000657	6.36342e-35	RS27A_ICTPU Ubiquitin-40S ribosomal protein S27a OS=Ictalurus punctatus OX=7998 GN=rps27a PE=2 SV=2
contig_7dpi0001290	3.35771	INT3_DANRE Integrator complex subunit 3 OS=Danio rerio OX=7955 GN=ints3 PE=2 SV=1
contig_7dpi0001937	1.25606e-76	YBOX1_DANRE Y-box-binding protein 1 OS=Danio rerio OX=7955 GN=ybx1 PE=1 SV=1
contig_7dpi0318703	0.717326	VAT1_DANRE Synaptic vesicle membrane protein VAT-1 homolog OS=Danio rerio OX=7955 GN=vat1 PE=2 SV=1
contig_7dpi0000218	2.56371e-33	HBB1_ONCMY Hemoglobin subunit beta-1 OS=Oncorhynchus mykiss OX=8022 GN=hbb1 PE=1 SV=1
contig_7dpi0005846	9.31245	RFX3_DANRE Transcription factor RFX3 OS=Danio rerio OX=7955 GN=rfx3 PE=2 SV=1
contig_7dpi0090347	4.40447e-07	RS6_ONCMY 40S ribosomal protein S6 OS=Oncorhynchus mykiss OX=8022 GN=rps6 PE=2 SV=1
contig_7dpi0279194	0.926926	TATD1_DANRE Putative deoxyribonuclease TATDN1 OS=Danio rerio OX=7955 GN=tatdn1 PE=2 SV=1
contig_7dpi0000763	0.460781	H2AV_DANRE Histone H2A.V OS=Danio rerio OX=7955 GN=h2afv PE=2 SV=3
contig_7dpi0192284	0.229687	JAK1_DANRE Tyrosine-protein kinase JAK1 OS=Danio rerio OX=7955 GN=jak1 PE=1 SV=1
contig_7dpi0205013		not available
contig_7dpi0003889	2.11771	SPIR1_DANRE Protein spire homolog 1 OS=Danio rerio OX=7955 GN=spire1 PE=2 SV=1
contig_7dpi0001464	1.97776e-117	PLSL_DANRE Plastin-2 OS=Danio rerio OX=7955 GN=lcp1 PE=2 SV=1
contig_7dpi0000279	2.10834e-82	RS17_ICTPU 40S ribosomal protein S17 OS=Ictalurus punctatus OX=7998 GN=rps17 PE=2 SV=3
contig_7dpi0003030	4.33155e-60	RL36_ICTPU 60S ribosomal protein L36 OS=Ictalurus punctatus OX=7998 GN=rpl36 PE=3 SV=1
contig_7dpi0279192	4.15399e-30	RL11_ICTPU 60S ribosomal protein L11 OS=Ictalurus punctatus OX=7998 GN=rpl11 PE=2 SV=3
contig_7dpi0000034	2.40579e-25	COR1C_DANRE Coronin-1C-A OS=Danio rerio OX=7955 GN=coro1ca PE=2 SV=1
contig_7dpi0000531	1.28271	MAD3_DANRE Max dimerization protein 3 OS=Danio rerio OX=7955 GN=mxd3 PE=2 SV=1
contig_7dpi0000028	0.700991	COLI2_ONCMY Pro-opiomelanocortin B OS=Oncorhynchus mykiss OX=8022 GN=pomcb PE=2 SV=1
contig_7dpi0001401	4.08278	WSCD2_DANRE WSC domain-containing protein 2 OS=Danio rerio OX=7955 GN=wscd2 PE=3 SV=1
contig_7dpi0002090	8.13151e-32	RS27A_ICTPU Ubiquitin-40S ribosomal protein S27a OS=Ictalurus punctatus OX=7998 GN=rps27a PE=2 SV=2
contig_7dpi0003724		not available
contig_7dpi0308551	1.72201e-11	B2MG_DANRE Beta-2-microglobulin OS=Danio rerio OX=7955 GN=b2m PE=1 SV=1
contig_7dpi0414101	1.47795	GTPBA_DANRE GTP-binding protein 10 OS=Danio rerio OX=7955 GN=gtpbp10 PE=2 SV=1
contig_7dpi0066647	1.14628	PDS5A_DANRE Sister chromatid cohesion protein PDS5 homolog A OS=Danio rerio OX=7955 GN=pds5a PE=2 SV=1
contig_7dpi0000441	3.6604e-10	B3AT_ONCMY Band 3 anion exchange protein OS=Oncorhynchus mykiss OX=8022 GN=slc4a1 PE=2 SV=2
contig_7dpi0004201	6.2343e-52	RL37_ICTPU 60S ribosomal protein L37 OS=Ictalurus punctatus OX=7998 GN=rpl37 PE=3 SV=3
contig_7dpi0121712	0.258933	AMER1_DANRE APC membrane recruitment protein 1 OS=Danio rerio OX=7955 GN=amer1 PE=2 SV=1
contig_7dpi0000440	3.5401e-10	B3AT_ONCMY Band 3 anion exchange protein OS=Oncorhynchus mykiss OX=8022 GN=slc4a1 PE=2 SV=2
contig_7dpi0002501	2.937	TCF21_DANRE Transcription factor 21 OS=Danio rerio OX=7955 GN=tcf21 PE=2 SV=1
contig_7dpi0001134	1.00952e-49	TRY3_SALSA Trypsin-3 (Fragment) OS=Salmo salar OX=8030 PE=1 SV=1
contig_7dpi0000113	1.75879e-158	CAHZ_DANRE Carbonic anhydrase OS=Danio rerio OX=7955 GN=cahz PE=1 SV=2
contig_7dpi0002331	1.63504e-92	RS19_PAGMA 40S ribosomal protein S19 OS=Pagrus major OX=143350 GN=rps19 PE=2 SV=1
contig_7dpi0676256	2.3038	EPD2_ONCMY Ependymin-2 OS=Oncorhynchus mykiss OX=8022 GN=epd2 PE=2 SV=1
contig_7dpi0003225	3.75666e-30	G3P2_DANRE Glyceraldehyde-3-phosphate dehydrogenase 2 OS=Danio rerio OX=7955 GN=gapdh-2 PE=2 SV=1
contig_7dpi0001483	3.59937e-160	PLSL_DANRE Plastin-2 OS=Danio rerio OX=7955 GN=lcp1 PE=2 SV=1
contig_7dpi0000522	5.12779e-156	RS2_ICTPU 40S ribosomal protein S2 OS=Ictalurus punctatus OX=7998 GN=rps2 PE=2 SV=1
contig_7dpi0004793	1.72297	AL9A1_ORYLA 4-trimethylaminobutyraldehyde dehydrogenase OS=Oryzias latipes OX=8090 GN=aldh9A1 PE=2 SV=1
contig_7dpi0096030		not available
contig_7dpi0001828	0	TBA_ONCKE Tubulin alpha chain OS=Oncorhynchus keta OX=8018 PE=2 SV=2
contig_7dpi0002405	1.58618	MYCB2_DANRE E3 ubiquitin-protein ligase MYCBP2 OS=Danio rerio OX=7955 GN=mycbp2 PE=2 SV=1
contig_7dpi0105101	0.595196	C149A_DANRE Coiled-coil domain-containing protein 149-A OS=Danio rerio OX=7955 GN=ccdc149a PE=2 SV=1
contig_7dpi0016400	3.14112e-18	TMA7_DANRE Translation machinery-associated protein 7 OS=Danio rerio OX=7955 GN=tma7 PE=3 SV=1
contig_7dpi0176330	7.84737e-34	RL11_ICTPU 60S ribosomal protein L11 OS=Ictalurus punctatus OX=7998 GN=rpl11 PE=2 SV=3
contig_7dpi0282342	0.54037	PHR_CARAU Deoxyribodipyrimidine photo-lyase OS=Carassius auratus OX=7957 GN=phr PE=2 SV=1
contig_7dpi0156685	0.865299	HYOU1_DANRE Hypoxia up-regulated protein 1 OS=Danio rerio OX=7955 GN=hyou1 PE=2 SV=1
contig_7dpi0003491	0.417615	GNL3_DANRE Guanine nucleotide-binding protein-like 3 OS=Danio rerio OX=7955 GN=gnl3 PE=2 SV=1
contig_7dpi0007104	8.58643e-92	G3P_ONCMY Glyceraldehyde-3-phosphate dehydrogenase OS=Oncorhynchus mykiss OX=8022 GN=gapdh PE=2 SV=1
contig_7dpi0001427	4.81166e-42	RS27A_ICTPU Ubiquitin-40S ribosomal protein S27a OS=Ictalurus punctatus OX=7998 GN=rps27a PE=2 SV=2
contig_7dpi0000396	4.07369e-150	RL10_DANRE 60S ribosomal protein L10 OS=Danio rerio OX=7955 GN=rpl10 PE=2 SV=1
contig_7dpi0010277	7.2776e-48	RL37_ICTPU 60S ribosomal protein L37 OS=Ictalurus punctatus OX=7998 GN=rpl37 PE=3 SV=3
contig_7dpi0120264	1.65622e-21	HBA_SALSA Hemoglobin subunit alpha OS=Salmo salar OX=8030 GN=hba PE=2 SV=2
contig_7dpi0000309	1.85445e-146	RAN_SALSA GTP-binding nuclear protein Ran OS=Salmo salar OX=8030 GN=ran PE=2 SV=1
contig_7dpi0011557	0.187553	ESCO2_DANRE N-acetyltransferase ESCO2 OS=Danio rerio OX=7955 GN=esco2 PE=2 SV=1
contig_7dpi0001520	2.32169e-34	CALM_EPIAK Calmodulin OS=Epinephelus akaara OX=215347 GN=calm PE=2 SV=3
contig_7dpi0226410	0.119855	HXB1B_DANRE Homeobox protein Hox-B1b OS=Danio rerio OX=7955 GN=hoxb1b PE=2 SV=3
contig_7dpi0001234	9.15266e-54	RS18_ICTPU 40S ribosomal protein S18 OS=Ictalurus punctatus OX=7998 GN=rps18 PE=2 SV=1
contig_7dpi0000744	5.67649e-30	RS28_ICTPU 40S ribosomal protein S28 OS=Ictalurus punctatus OX=7998 GN=rps28 PE=3 SV=1
contig_7dpi0018015	1.43593	DTWD1_DANRE DTW domain-containing protein 1 OS=Danio rerio OX=7955 GN=dtwd1 PE=2 SV=1
contig_7dpi0101728	9.71715e-17	HBA4_ONCMY Hemoglobin subunit alpha-4 OS=Oncorhynchus mykiss OX=8022 GN=hba4 PE=1 SV=1
contig_7dpi0193444	1.08145	NGDN_DANRE Neuroguidin OS=Danio rerio OX=7955 GN=ngdn PE=2 SV=1
contig_7dpi0002796	4.16364e-10	COL11_DANRE Collectin-11 OS=Danio rerio OX=7955 GN=colec11 PE=2 SV=1
contig_7dpi0000568	5.75031e-15	H32_DANRE Histone H3.2 OS=Danio rerio OX=7955 GN=zgc:113984 PE=2 SV=3
contig_7dpi0162312	3.67628e-16	RL32_ICTPU 60S ribosomal protein L32 OS=Ictalurus punctatus OX=7998 GN=rpl32 PE=2 SV=1
contig_7dpi0118329	1.70078e-14	RS15_XIPMA 40S ribosomal protein S15 OS=Xiphophorus maculatus OX=8083 GN=rps15 PE=2 SV=1
contig_7dpi0236108	0.973472	TYBB_CYPCA Thymosin beta-b OS=Cyprinus carpio OX=7962 PE=3 SV=3
contig_7dpi0006689	2.08277e-14	CWC27_DANRE Spliceosome-associated protein CWC27 homolog OS=Danio rerio OX=7955 GN=cwc27 PE=2 SV=1
contig_7dpi0001869	1.61494e-39	RL19_ICTPU 60S ribosomal protein L19 OS=Ictalurus punctatus OX=7998 GN=rpl19 PE=2 SV=1
contig_7dpi0116244	0.71167	RMI1_DANRE RecQ-mediated genome instability protein 1 OS=Danio rerio OX=7955 GN=rmi1 PE=2 SV=1
contig_7dpi0333005	2.41577e-16	HMGT_ONCMY High mobility group-T protein OS=Oncorhynchus mykiss OX=8022 PE=2 SV=2
contig_7dpi0000422	1.86241	DZIP1_DANRE Zinc finger protein Dzip1 OS=Danio rerio OX=7955 GN=dzip1 PE=2 SV=2
contig_7dpi0002440	4.56708	LAMB4_DANRE Laminin subunit beta-4 OS=Danio rerio OX=7955 GN=lamb4 PE=2 SV=1
contig_7dpi0002790	1.09998e-108	RL13_DANRE 60S ribosomal protein L13 OS=Danio rerio OX=7955 GN=rpl13 PE=2 SV=3
contig_7dpi0000326	4.50028e-51	RL37_ICTPU 60S ribosomal protein L37 OS=Ictalurus punctatus OX=7998 GN=rpl37 PE=3 SV=3
contig_7dpi0014125	0.0723749	ZN704_DANRE Zinc finger protein 704 OS=Danio rerio OX=7955 GN=znf704 PE=3 SV=2
contig_7dpi0012407	1.16547	AEBP2_DANRE Zinc finger protein AEBP2 OS=Danio rerio OX=7955 GN=aebp2 PE=2 SV=2
contig_7dpi0003275	0.275924	UCK2B_DANRE Uridine-cytidine kinase 2-B OS=Danio rerio OX=7955 GN=uck2b PE=2 SV=1
contig_7dpi0006003	7.71418e-143	TBA_ONCKE Tubulin alpha chain OS=Oncorhynchus keta OX=8018 PE=2 SV=2
contig_7dpi0005954	7.17096e-08	HBA4_ONCMY Hemoglobin subunit alpha-4 OS=Oncorhynchus mykiss OX=8022 GN=hba4 PE=1 SV=1
contig_7dpi0000222	2.91777e-80	ALDOA_SALSA Fructose-bisphosphate aldolase A OS=Salmo salar OX=8030 PE=1 SV=1
contig_7dpi0012619	0.0371588	MUCM_ICTPU Ig mu chain C region membrane-bound form OS=Ictalurus punctatus OX=7998 PE=2 SV=2
contig_7dpi0002898	2.07027	DICER_DANRE Endoribonuclease Dicer OS=Danio rerio OX=7955 GN=dicer1 PE=2 SV=2
contig_7dpi0000780	0	TBB1_GADMO Tubulin beta-1 chain OS=Gadus morhua OX=8049 PE=2 SV=1
contig_7dpi0003360	0.010676	HV03_CARAU Ig heavy chain V region 3 OS=Carassius auratus OX=7957 PE=4 SV=1
contig_7dpi0024343	0.579308	MED12_DANRE Mediator of RNA polymerase II transcription subunit 12 OS=Danio rerio OX=7955 GN=med12 PE=2 SV=1
contig_7dpi0002200	0.401107	PCX1_TAKRU Pecanex-like protein 1 OS=Takifugu rubripes OX=31033 GN=pcnx1 PE=3 SV=1
contig_7dpi0003853	1.98119e-18	SPD2A_DANRE SH3 and PX domain-containing protein 2A OS=Danio rerio OX=7955 GN=sh3pxd2a PE=3 SV=2
contig_7dpi0005917	6.54634e-41	RS3_ICTPU 40S ribosomal protein S3 OS=Ictalurus punctatus OX=7998 GN=rps3 PE=2 SV=1
contig_7dpi0000559	1.22351e-106	EF1G_DANRE Elongation factor 1-gamma OS=Danio rerio OX=7955 GN=eef1g PE=2 SV=1
contig_7dpi0000064	1.53289e-89	COR1C_DANRE Coronin-1C-A OS=Danio rerio OX=7955 GN=coro1ca PE=2 SV=1
contig_7dpi0002630	3.95595e-34	D42E1_DANRE Short-chain dehydrogenase/reductase family 42E member 1 OS=Danio rerio OX=7955 GN=sdr42e1 PE=2 SV=1
contig_7dpi0003526	0.324586	HME2A_DANRE Homeobox protein engrailed-2a OS=Danio rerio OX=7955 GN=eng2a PE=2 SV=2
contig_7dpi0000767	1.06187e-13	HBA1_ONCMY Hemoglobin subunit alpha-1 OS=Oncorhynchus mykiss OX=8022 GN=hba1 PE=1 SV=1
contig_7dpi0002899	1.11025	SCNA_ELEEL Sodium channel protein OS=Electrophorus electricus OX=8005 PE=1 SV=1
contig_7dpi0000359	0	LDHBA_DANRE L-lactate dehydrogenase B-A chain OS=Danio rerio OX=7955 GN=ldhba PE=2 SV=4
contig_7dpi0013964	0.000654679	SPT5H_DANRE Transcription elongation factor SPT5 OS=Danio rerio OX=7955 GN=supt5h PE=1 SV=1
contig_7dpi0292748	0.920962	RN150_DANRE RING finger protein 150 OS=Danio rerio OX=7955 GN=rnf150 PE=2 SV=1
contig_7dpi0003370	1.8218	ZN598_DANRE E3 ubiquitin-protein ligase ZNF598 OS=Danio rerio OX=7955 GN=znf598 PE=1 SV=2
contig_7dpi0000146	2.04579e-98	CALM_ONCSP Calmodulin OS=Oncorhynchus sp. OX=8025 GN=calm PE=1 SV=2
contig_7dpi0004040	6.77306	NGF_XIPMA Nerve growth factor OS=Xiphophorus maculatus OX=8083 GN=ngf PE=3 SV=1
contig_7dpi0003244	2.41566e-15	TSN9_DANRE Tetraspanin-9 OS=Danio rerio OX=7955 GN=tspan9 PE=2 SV=1
contig_7dpi0390687	0.494766	ORML3_DANRE ORM1-like protein 3 OS=Danio rerio OX=7955 GN=ormdl3 PE=2 SV=1
contig_7dpi0001106	2.93888	SX19B_DANRE Transcription factor Sox-19b OS=Danio rerio OX=7955 GN=sox19b PE=1 SV=1
contig_7dpi0004824	0.708495	GON2_HAPBU Progonadoliberin-2 OS=Haplochromis burtoni OX=8153 GN=gnrh2 PE=2 SV=1
contig_7dpi0003974		not available
contig_7dpi0000702	3.89073e-32	CALM_EPIAK Calmodulin OS=Epinephelus akaara OX=215347 GN=calm PE=2 SV=3
contig_7dpi0225608	2.14077e-14	HBB_SALSA Hemoglobin subunit beta OS=Salmo salar OX=8030 GN=hbb PE=2 SV=3
contig_7dpi0003649	2.36105	NCOA2_DANRE Nuclear receptor coactivator 2 OS=Danio rerio OX=7955 GN=ncoa2 PE=1 SV=1
contig_7dpi0002602	1.97936	PHF2_DICLA Lysine-specific demethylase phf2 OS=Dicentrarchus labrax OX=13489 GN=phf2 PE=3 SV=1
contig_7dpi0000542	0.701192	MUCM_ICTPU Ig mu chain C region membrane-bound form OS=Ictalurus punctatus OX=7998 PE=2 SV=2
contig_7dpi0002040	3.0758e-38	CX6C1_THUOB Cytochrome c oxidase subunit 6C-1 OS=Thunnus obesus OX=8241 PE=1 SV=2
contig_7dpi0005188	6.09419e-21	CWC27_DANRE Spliceosome-associated protein CWC27 homolog OS=Danio rerio OX=7955 GN=cwc27 PE=2 SV=1
contig_7dpi0008049	1.01701	CWC22_DANRE Pre-mRNA-splicing factor CWC22 homolog OS=Danio rerio OX=7955 GN=cwc22 PE=2 SV=1
contig_7dpi0013497		not available
contig_7dpi0002653	0.373059	RGPS1_DANRE Ras-specific guanine nucleotide-releasing factor RalGPS1 OS=Danio rerio OX=7955 GN=ralgps1 PE=2 SV=1
contig_7dpi0000951	0.0295913	MUCM_ICTPU Ig mu chain C region membrane-bound form OS=Ictalurus punctatus OX=7998 PE=2 SV=2
contig_7dpi0003012	6.41819e-26	RSSA_SALSA 40S ribosomal protein SA OS=Salmo salar OX=8030 GN=rpsa PE=2 SV=1
contig_7dpi0000334	0.0551373	UBR3_DANRE E3 ubiquitin-protein ligase ubr3 OS=Danio rerio OX=7955 GN=ubr3 PE=2 SV=2
contig_7dpi0007331	1.80813	VRTN_DANRE Vertnin OS=Danio rerio OX=7955 GN=vrtn PE=2 SV=1
contig_7dpi0003226	1.7359e-153	G3P_ONCMY Glyceraldehyde-3-phosphate dehydrogenase OS=Oncorhynchus mykiss OX=8022 GN=gapdh PE=2 SV=1
contig_7dpi0000345	3.43469e-29	H2AV_DANRE Histone H2A.V OS=Danio rerio OX=7955 GN=h2afv PE=2 SV=3
contig_7dpi0001420	1.74333e-98	ALDOA_SALSA Fructose-bisphosphate aldolase A OS=Salmo salar OX=8030 PE=1 SV=1
contig_7dpi0000798	2.18427e-05	TWF2_DANRE Twinfilin-2 OS=Danio rerio OX=7955 GN=twf2 PE=2 SV=1
contig_7dpi0004966	1.26014	TEN3_DANRE Teneurin-3 OS=Danio rerio OX=7955 GN=tenm3 PE=2 SV=2
contig_7dpi0006097	0.829825	RBM41_DANRE RNA-binding protein 4.1 OS=Danio rerio OX=7955 GN=rbm4.1 PE=1 SV=1
contig_7dpi0263235	0.252323	SCNA_ELEEL Sodium channel protein OS=Electrophorus electricus OX=8005 PE=1 SV=1
contig_7dpi0017057	2.7633	F214A_DANRE Protein FAM214A OS=Danio rerio OX=7955 GN=fam214a PE=2 SV=2
contig_7dpi0011785	2.66815e-64	REEP6_DANRE Receptor expression-enhancing protein 6 OS=Danio rerio OX=7955 GN=reep6 PE=2 SV=1
contig_7dpi0006145	1.1015e-35	RS27A_ICTPU Ubiquitin-40S ribosomal protein S27a OS=Ictalurus punctatus OX=7998 GN=rps27a PE=2 SV=2
contig_7dpi0000278	1.84301e-92	RS17_ICTPU 40S ribosomal protein S17 OS=Ictalurus punctatus OX=7998 GN=rps17 PE=2 SV=3
contig_7dpi0000595	1.38731e-49	RL15_PARDA 60S ribosomal protein L15 OS=Paramisgurnus dabryanus OX=90735 GN=rpl15 PE=2 SV=3
contig_7dpi0002558	0.351987	DGAT2_DANRE Diacylglycerol O-acyltransferase 2 OS=Danio rerio OX=7955 GN=dgat2 PE=2 SV=1
contig_7dpi0000353	3.24662	A9A1B_DANRE 4-trimethylaminobutyraldehyde dehydrogenase B OS=Danio rerio OX=7955 GN=aldh9a1b PE=2 SV=2
contig_7dpi0006237		not available
contig_7dpi0000747	1.15871e-70	RS8_ICTPU 40S ribosomal protein S8 OS=Ictalurus punctatus OX=7998 GN=rps8 PE=2 SV=3
contig_7dpi0008602		not available
contig_7dpi0001926	2.98993	GXLT1_DANRE Glucoside xylosyltransferase 1 OS=Danio rerio OX=7955 GN=gxylt1 PE=3 SV=1
contig_7dpi0005820	0.79038	SHA9B_DANRE Protein shisa-9B OS=Danio rerio OX=7955 GN=shisa9b PE=2 SV=1
contig_7dpi0001836	0	TBA_ONCKE Tubulin alpha chain OS=Oncorhynchus keta OX=8018 PE=2 SV=2
contig_7dpi0027502	2.90617	NU4M_DANRE NADH-ubiquinone oxidoreductase chain 4 OS=Danio rerio OX=7955 GN=mt-nd4 PE=3 SV=1
contig_7dpi0169770	4.99636	CX111_DANRE C-X-C motif chemokine 11-1 OS=Danio rerio OX=7955 GN=cxcl11.1 PE=2 SV=1
contig_7dpi0003772	8.03647	TGFA1_DANRE Transforming growth factor-beta receptor-associated protein 1 homolog OS=Danio rerio OX=7955 GN=tgfbrap1 PE=2 SV=1
contig_7dpi0139862	7.4683	GCNFA_DANRE Nuclear receptor subfamily 6 group A member 1-A OS=Danio rerio OX=7955 GN=nr6a1a PE=2 SV=2
contig_7dpi0006960	7.32758e-110	143B2_ONCMY 14-3-3 protein beta/alpha-2 OS=Oncorhynchus mykiss OX=8022 PE=2 SV=1
contig_7dpi0002605		not available
contig_7dpi0003063	1.24555e-58	RL36_ICTPU 60S ribosomal protein L36 OS=Ictalurus punctatus OX=7998 GN=rpl36 PE=3 SV=1
contig_7dpi0003495	1.07876	XPO6_DANRE Exportin-6 OS=Danio rerio OX=7955 GN=xpo6 PE=2 SV=1
contig_7dpi0005187	6.71694e-08	TSN33_DANRE Tetraspanin-33 OS=Danio rerio OX=7955 GN=tspan33 PE=2 SV=1
contig_7dpi0003838	8.22693e-18	THIO_ICTPU Thioredoxin OS=Ictalurus punctatus OX=7998 GN=txn PE=3 SV=1
contig_7dpi0000142	2.19487e-34	TDX_ONCMY Peroxiredoxin OS=Oncorhynchus mykiss OX=8022 PE=2 SV=1
contig_7dpi0001248	4.43702e-85	RS23_ICTPU 40S ribosomal protein S23 OS=Ictalurus punctatus OX=7998 GN=rps23 PE=2 SV=1
contig_7dpi0009802	0.0385933	O1312_DANRE Odorant receptor 131-2 OS=Danio rerio OX=7955 GN=or131-2 PE=1 SV=1
contig_7dpi0250295	7.20895	MTMRC_DANRE Myotubularin-related protein 12 OS=Danio rerio OX=7955 GN=mtmr12 PE=1 SV=1
contig_7dpi0063183	1.01242	PSA7_CARAU Proteasome subunit alpha type-7 OS=Carassius auratus OX=7957 GN=psma7 PE=2 SV=1
contig_7dpi0312832	0.00614732	RL31_ICTPU 60S ribosomal protein L31 OS=Ictalurus punctatus OX=7998 GN=rpl31 PE=2 SV=1
contig_7dpi0226121	2.13601	MMP21_DANRE Matrix metallopeptidase-21 OS=Danio rerio OX=7955 GN=mmp21 PE=2 SV=2
contig_7dpi0013049	0.209037	AOF_ONCMY Amine oxidase [flavin-containing] OS=Oncorhynchus mykiss OX=8022 GN=mao PE=2 SV=2
contig_7dpi0002781	1.25941e-48	FRIM_SALSA Ferritin, middle subunit OS=Salmo salar OX=8030 PE=2 SV=1
contig_7dpi0061424	0.0118808	PUS7L_DANRE Pseudouridylate synthase 7 homolog-like protein OS=Danio rerio OX=7955 GN=pus7l PE=2 SV=1
contig_7dpi0009851	4.66659	ORA1_DANRE Olfactory receptor class A-like protein 1 OS=Danio rerio OX=7955 GN=ora1 PE=2 SV=1
contig_7dpi0002446	0.61041	S20AA_DANRE Sodium-dependent phosphate transporter 1-A OS=Danio rerio OX=7955 GN=slc20a1a PE=2 SV=1
contig_7dpi0002532	0	HEM0_OPSTA 5-aminolevulinate synthase, erythroid-specific, mitochondrial OS=Opsanus tau OX=8068 GN=alas2 PE=2 SV=1
contig_7dpi0009215		not available
contig_7dpi0003763	2.33556	HEPC_MORCS Hepcidin OS=Morone chrysops x Morone saxatilis OX=45352 GN=hamp PE=1 SV=1
contig_7dpi0023050	1.81038e-05	RS27A_ICTPU Ubiquitin-40S ribosomal protein S27a OS=Ictalurus punctatus OX=7998 GN=rps27a PE=2 SV=2
contig_7dpi0000223	2.20254e-163	ALDOA_SALSA Fructose-bisphosphate aldolase A OS=Salmo salar OX=8030 PE=1 SV=1
contig_7dpi0000417	5.79341e-19	RSSA_SALSA 40S ribosomal protein SA OS=Salmo salar OX=8030 GN=rpsa PE=2 SV=1
contig_7dpi0005952	0.472522	TM138_DANRE Transmembrane protein 138 OS=Danio rerio OX=7955 GN=tmem138 PE=3 SV=1
contig_7dpi0007918	0.818103	OPSV_ORYLA Putative violet-sensitive opsin OS=Oryzias latipes OX=8090 PE=1 SV=1
contig_7dpi0002721	7.07945e-69	CP17A_ICTPU Steroid 17-alpha-hydroxylase/17,20 lyase OS=Ictalurus punctatus OX=7998 GN=cyp17a1 PE=2 SV=1
contig_7dpi0038551	3.49762	MBB1A_DANRE Myb-binding protein 1A-like protein OS=Danio rerio OX=7955 GN=mybbp1a PE=1 SV=1
contig_7dpi0016492	1.41443e-18	COR1C_DANRE Coronin-1C-A OS=Danio rerio OX=7955 GN=coro1ca PE=2 SV=1
contig_7dpi0045704	0.000182914	NIPLB_DANRE Nipped-B-like protein B OS=Danio rerio OX=7955 GN=nipblb PE=2 SV=1
contig_7dpi0017727	0.212484	GDF8_EPICO Growth/differentiation factor 8 OS=Epinephelus coioides OX=94232 GN=gdf-8 PE=1 SV=1
contig_7dpi0005724	1.02592	RABEK_DANRE Rab9 effector protein with kelch motifs OS=Danio rerio OX=7955 GN=rabepk PE=2 SV=1
contig_7dpi0002563	1.10602	JAK1_DANRE Tyrosine-protein kinase JAK1 OS=Danio rerio OX=7955 GN=jak1 PE=1 SV=1
contig_7dpi0032146	0.30778	RFA1_DANRE Replication protein A 70 kDa DNA-binding subunit OS=Danio rerio OX=7955 GN=rpa1 PE=1 SV=1
contig_7dpi0004596	2.72494	GON1_VERMO Progonadoliberin-1 OS=Verasper moseri OX=98923 GN=gnrh1 PE=2 SV=1
contig_7dpi0026808	0.550453	RIR1_DANRE Ribonucleoside-diphosphate reductase large subunit OS=Danio rerio OX=7955 GN=rrm1 PE=2 SV=1
contig_7dpi0000143	1.36053e-33	TDX_ONCMY Peroxiredoxin OS=Oncorhynchus mykiss OX=8022 PE=2 SV=1
contig_7dpi0043711	0.263037	BZW1A_DANRE Basic leucine zipper and W2 domain-containing protein 1-A OS=Danio rerio OX=7955 GN=bzw1a PE=2 SV=1
contig_7dpi0004906		not available
contig_7dpi0002233	3.64809	S2548_DANRE Solute carrier family 25 member 48 OS=Danio rerio OX=7955 GN=slc25a48 PE=2 SV=1
contig_7dpi0006002	5.65343e-24	THIO_ICTPU Thioredoxin OS=Ictalurus punctatus OX=7998 GN=txn PE=3 SV=1
contig_7dpi0008401	0.450156	AGRV1_DANRE Adhesion G-protein coupled receptor V1 OS=Danio rerio OX=7955 GN=adgrv1 PE=2 SV=1
contig_7dpi0005220	2.04676	OLA1_DANRE Obg-like ATPase 1 OS=Danio rerio OX=7955 GN=ola1 PE=2 SV=1
contig_7dpi0000437	3.24135	TRIO_DANRE Triple functional domain protein OS=Danio rerio OX=7955 GN=trio PE=3 SV=1
contig_7dpi0061877	2.60343e-22	RS24_TAKRU 40S ribosomal protein S24 OS=Takifugu rubripes OX=31033 GN=rps24 PE=3 SV=1
contig_7dpi0004101	6.84256	EPD_CLUHA Ependymin OS=Clupea harengus OX=7950 GN=epd PE=2 SV=1
contig_7dpi0005947	0.26855	TPC2_DANRE Two pore calcium channel protein 2 OS=Danio rerio OX=7955 GN=tpcn2 PE=2 SV=1
contig_7dpi0005871	3.45565	NOC3L_DANRE Nucleolar complex protein 3 homolog OS=Danio rerio OX=7955 GN=noc3l PE=2 SV=1
contig_7dpi0003734	0.500098	EPO_TAKRU Erythropoietin OS=Takifugu rubripes OX=31033 GN=epo PE=2 SV=1
contig_7dpi0005843	5.97337	RN145_DANRE RING finger protein 145 OS=Danio rerio OX=7955 GN=rnf145 PE=2 SV=1
contig_7dpi0077069		not available
contig_7dpi0222088	0.329781	CO9_TAKRU Complement component C9 OS=Takifugu rubripes OX=31033 GN=c9 PE=3 SV=1
contig_7dpi0005127	0.0611767	MEI4_DANRE Meiosis-specific protein MEI4 OS=Danio rerio OX=7955 GN=mei4 PE=2 SV=1
contig_7dpi0015349		not available
contig_7dpi0006108	8.6047	PRTGA_DANRE Protogenin A OS=Danio rerio OX=7955 GN=prtga PE=2 SV=1
contig_7dpi0025285	0.8519	UBR3_DANRE E3 ubiquitin-protein ligase ubr3 OS=Danio rerio OX=7955 GN=ubr3 PE=2 SV=2
contig_7dpi0347361	0.412	ARMC8_DANRE Armadillo repeat-containing protein 8 OS=Danio rerio OX=7955 GN=armc8 PE=2 SV=1
contig_7dpi0011341	0.0552421	CRA1A_DANRE Collagen alpha-1(XXVII) chain A OS=Danio rerio OX=7955 GN=col27a1a PE=2 SV=1
contig_7dpi0000109	4.48301e-27	RL39_ICTPU 60S ribosomal protein L39 OS=Ictalurus punctatus OX=7998 GN=rpl39 PE=3 SV=1
contig_7dpi0006300	0.337905	PO5F1_DANRE POU domain, class 5, transcription factor 1 OS=Danio rerio OX=7955 GN=pou5f1 PE=2 SV=1
contig_7dpi0002556	2.44864	SHH_DANRE Sonic hedgehog protein A OS=Danio rerio OX=7955 GN=shha PE=1 SV=1
contig_7dpi0013433	2.15215	UCP2_CYPCA Mitochondrial uncoupling protein 2 OS=Cyprinus carpio OX=7962 GN=ucp2 PE=2 SV=1
contig_7dpi0007132	5.31004e-15	PSB1A_CARAU Proteasome subunit beta type-1-A OS=Carassius auratus OX=7957 GN=psmb1-A PE=2 SV=1
contig_7dpi0214724	0.414222	AGRA3_DANRE Adhesion G protein-coupled receptor A3 OS=Danio rerio OX=7955 GN=adgra3 PE=1 SV=1
contig_7dpi0003978	0.172076	ADA2_DANRE Adenosine deaminase 2-A OS=Danio rerio OX=7955 GN=ada2a PE=2 SV=2
contig_7dpi0000083	2.4485e-75	UGT3_PLEPL UDP-glucuronosyltransferase (Fragment) OS=Pleuronectes platessa OX=8262 GN=ugt3 PE=2 SV=1
contig_7dpi0001115	5.84188	AGRV1_DANRE Adhesion G-protein coupled receptor V1 OS=Danio rerio OX=7955 GN=adgrv1 PE=2 SV=1
contig_7dpi0294545	0.740285	RBBP7_DANRE Histone-binding protein RBBP7 OS=Danio rerio OX=7955 GN=rbbp7 PE=2 SV=1
contig_7dpi0005499		not available
contig_7dpi0000750	1.77806e-117	BTB6B_DANRE BTB/POZ domain-containing protein 6-B OS=Danio rerio OX=7955 GN=btbd6b PE=2 SV=1
contig_7dpi0003379	3.17715e-139	APA11_ONCMY Apolipoprotein A-I-1 OS=Oncorhynchus mykiss OX=8022 PE=2 SV=1
contig_7dpi0105724		not available
contig_7dpi0010834	0.0485516	ESR22_CARAU Estrogen receptor beta-2 OS=Carassius auratus OX=7957 GN=esr2b PE=2 SV=1
contig_7dpi0009866	0.100718	MCU_DANRE Calcium uniporter protein, mitochondrial OS=Danio rerio OX=7955 GN=mcu PE=1 SV=1
contig_7dpi0014775	5.4763	COMTA_DANRE Catechol O-methyltransferase A OS=Danio rerio OX=7955 GN=comta PE=1 SV=1
contig_7dpi0096651	1.38973e-14	RS6_ONCMY 40S ribosomal protein S6 OS=Oncorhynchus mykiss OX=8022 GN=rps6 PE=2 SV=1
contig_7dpi0024863	3.5083e-40	HBA_SALSA Hemoglobin subunit alpha OS=Salmo salar OX=8030 GN=hba PE=2 SV=2
contig_7dpi0023986	5.74262e-19	RL32_ICTPU 60S ribosomal protein L32 OS=Ictalurus punctatus OX=7998 GN=rpl32 PE=2 SV=1
contig_7dpi0002562	0	EIF3I_DANRE Eukaryotic translation initiation factor 3 subunit I OS=Danio rerio OX=7955 GN=eif3i PE=2 SV=1
contig_7dpi0000406	0	ATPB_CYPCA ATP synthase subunit beta, mitochondrial OS=Cyprinus carpio OX=7962 GN=ATP5F1B PE=2 SV=1
contig_7dpi0004364		not available
contig_7dpi0205847	0.746968	INTU_DANRE Protein inturned OS=Danio rerio OX=7955 GN=intu PE=3 SV=1
contig_7dpi0006995		not available
contig_7dpi0007198		not available
contig_7dpi0005535	6.98837e-05	K1C18_DANRE Keratin, type I cytoskeletal 18 OS=Danio rerio OX=7955 GN=krt18 PE=1 SV=2
contig_7dpi0009541	1.0434e-38	EIF3D_DANRE Eukaryotic translation initiation factor 3 subunit D OS=Danio rerio OX=7955 GN=eif3d PE=2 SV=1
contig_7dpi0144686	1.72019	NOP16_DANRE Nucleolar protein 16 OS=Danio rerio OX=7955 GN=nop16 PE=2 SV=1
contig_7dpi0001410	8.38437e-29	FRIM_SALSA Ferritin, middle subunit OS=Salmo salar OX=8030 PE=2 SV=1
contig_7dpi0016178	5.14059	KD5BB_DANRE Lysine-specific demethylase 5B-B OS=Danio rerio OX=7955 GN=kdm5bb PE=2 SV=2
contig_7dpi0002105		not available
contig_7dpi0010268	1.49326e-06	RSRP1_DANRE Arginine/serine-rich protein 1 OS=Danio rerio OX=7955 GN=rsrp1 PE=2 SV=1
contig_7dpi0003798	0.668495	R213A_DANRE E3 ubiquitin-protein ligase rnf213-alpha OS=Danio rerio OX=7955 GN=rnf213a PE=3 SV=1
contig_7dpi0010400		not available
contig_7dpi0005745	3.78863	SOML_CYCLU Somatolactin OS=Cyclopterus lumpus OX=8103 PE=2 SV=1
contig_7dpi0249312	5.38947e-20	CYB_ONCMY Cytochrome b OS=Oncorhynchus mykiss OX=8022 GN=mt-cyb PE=3 SV=1
contig_7dpi0004366	3.71142	MXE_DANRE Interferon-induced GTP-binding protein MxE OS=Danio rerio OX=7955 GN=mxe PE=2 SV=1
contig_7dpi0663050	9.00848	ACTSB_TAKRU Actin, alpha skeletal muscle B OS=Takifugu rubripes OX=31033 GN=acta1b PE=2 SV=1
contig_7dpi0004929	3.38479	INT10_DANRE Integrator complex subunit 10 OS=Danio rerio OX=7955 GN=ints10 PE=2 SV=1
contig_7dpi0506147	0.443799	TPC11_DANRE Trafficking protein particle complex subunit 11 OS=Danio rerio OX=7955 GN=trappc11 PE=2 SV=1
contig_7dpi0001220	5.36018	RN146_DANRE E3 ubiquitin-protein ligase rnf146 OS=Danio rerio OX=7955 GN=rnf146 PE=2 SV=1
contig_7dpi0151742	0.334402	TSP1L_DANRE tRNA selenocysteine 1-associated protein 1-like OS=Danio rerio OX=7955 GN=trnau1apl PE=2 SV=1
contig_7dpi0290884	2.12362e-50	RS15_XIPMA 40S ribosomal protein S15 OS=Xiphophorus maculatus OX=8083 GN=rps15 PE=2 SV=1
contig_7dpi0000288	2.00751e-23	RL22_GADMO 60S ribosomal protein L22 (Fragment) OS=Gadus morhua OX=8049 GN=rpl22 PE=2 SV=2
contig_7dpi0334974	0.0318108	HELZ_DANRE Probable helicase with zinc finger domain OS=Danio rerio OX=7955 GN=helz PE=2 SV=1
contig_7dpi0004887	1.07158	TRPM2_DANRE Transient receptor potential cation channel subfamily M member 2 OS=Danio rerio OX=7955 GN=trpm2 PE=1 SV=2
contig_7dpi0328706	4.92333	MYCB2_DANRE E3 ubiquitin-protein ligase MYCBP2 OS=Danio rerio OX=7955 GN=mycbp2 PE=2 SV=1
contig_7dpi0000063	3.67557e-34	COR1C_DANRE Coronin-1C-A OS=Danio rerio OX=7955 GN=coro1ca PE=2 SV=1
contig_7dpi0000026	1.26964e-21	RS27A_ICTPU Ubiquitin-40S ribosomal protein S27a OS=Ictalurus punctatus OX=7998 GN=rps27a PE=2 SV=2
contig_7dpi0015072	2.14399e-07	SV91A_DANRE Histone-lysine N-methyltransferase SUV39H1-A OS=Danio rerio OX=7955 GN=suv39h1a PE=2 SV=2
contig_7dpi0004530	0	TBA_ONCKE Tubulin alpha chain OS=Oncorhynchus keta OX=8018 PE=2 SV=2
contig_7dpi0001551	4.95541	HBB2_TRENE Hemoglobin subunit beta OS=Trematomus newnesi OX=35730 PE=2 SV=3
contig_7dpi0008178	0.0359059	RUXE_DANRE Small nuclear ribonucleoprotein E OS=Danio rerio OX=7955 GN=snrpe PE=3 SV=1
contig_7dpi0016543	3.09622	DUSTY_TETNG Dual serine/threonine and tyrosine protein kinase OS=Tetraodon nigroviridis OX=99883 GN=dstyk PE=2 SV=1
contig_7dpi0013356	2.24429e-43	CYTB_OPLFA Cystatin-B OS=Oplegnathus fasciatus OX=163134 PE=2 SV=1
contig_7dpi0026814	1.9402	EYS_DANRE Protein eyes shut homolog OS=Danio rerio OX=7955 GN=eys PE=1 SV=2
contig_7dpi0001982	2.04303e-23	PSA7_CARAU Proteasome subunit alpha type-7 OS=Carassius auratus OX=7957 GN=psma7 PE=2 SV=1
contig_7dpi0013965	0.000200253	SPT5H_DANRE Transcription elongation factor SPT5 OS=Danio rerio OX=7955 GN=supt5h PE=1 SV=1
contig_7dpi0000509	7.21921	MEI4_DANRE Meiosis-specific protein MEI4 OS=Danio rerio OX=7955 GN=mei4 PE=2 SV=1
contig_7dpi0000227	2.47327	CEP76_DANRE Centrosomal protein of 76 kDa OS=Danio rerio OX=7955 GN=cep76 PE=2 SV=1
contig_7dpi0003896		not available
contig_7dpi0002948	0.609667	GNL3_DANRE Guanine nucleotide-binding protein-like 3 OS=Danio rerio OX=7955 GN=gnl3 PE=2 SV=1
contig_7dpi0429474	0.0383224	PCX1_TAKRU Pecanex-like protein 1 OS=Takifugu rubripes OX=31033 GN=pcnx1 PE=3 SV=1
contig_7dpi0001779	8.80197e-22	RSSA_SALSA 40S ribosomal protein SA OS=Salmo salar OX=8030 GN=rpsa PE=2 SV=1
contig_7dpi0004690	3.97996e-32	PEF1_DANRE Peflin OS=Danio rerio OX=7955 GN=pef1 PE=2 SV=1
contig_7dpi0071319		not available
contig_7dpi0015634	8.59077	RGS8_DANRE Regulator of G-protein signaling 8 OS=Danio rerio OX=7955 GN=rgs8 PE=2 SV=1
contig_7dpi0006416	0.322462	SMAD5_DANRE Mothers against decapentaplegic homolog 5 OS=Danio rerio OX=7955 GN=smad5 PE=2 SV=1
contig_7dpi0022905	0.110525	MAGT1_DANRE Magnesium transporter protein 1 OS=Danio rerio OX=7955 GN=magt1 PE=1 SV=1
contig_7dpi0008866	2.20322e-32	RUXE_DANRE Small nuclear ribonucleoprotein E OS=Danio rerio OX=7955 GN=snrpe PE=3 SV=1
contig_7dpi0000302	1.27769	LAMB4_DANRE Laminin subunit beta-4 OS=Danio rerio OX=7955 GN=lamb4 PE=2 SV=1
contig_7dpi0007902	0.681187	UCP2_CYPCA Mitochondrial uncoupling protein 2 OS=Cyprinus carpio OX=7962 GN=ucp2 PE=2 SV=1
contig_7dpi0012696	3.68097	ACSF4_DANRE Beta-alanine-activating enzyme OS=Danio rerio OX=7955 GN=aasdh PE=3 SV=1
contig_7dpi0012564	1.78132	UFC1_SALSA Ubiquitin-fold modifier-conjugating enzyme 1 OS=Salmo salar OX=8030 GN=ufc1 PE=2 SV=1
contig_7dpi0011169	0.914888	SMI19_DANRE Small integral membrane protein 19 OS=Danio rerio OX=7955 GN=smim19 PE=3 SV=2
contig_7dpi0005776	2.91297	HNF1A_SALSA Hepatocyte nuclear factor 1-alpha OS=Salmo salar OX=8030 GN=hnf1a PE=2 SV=1
contig_7dpi0008665	1.23446e-06	PTPRF_DANRE Receptor-type tyrosine-protein phosphatase F OS=Danio rerio OX=7955 GN=ptprf PE=2 SV=1
contig_7dpi0271755	0.000347315	NU6M_ONCMY NADH-ubiquinone oxidoreductase chain 6 OS=Oncorhynchus mykiss OX=8022 GN=MT-ND6 PE=3 SV=2
contig_7dpi0057047	0.165315	RELCH_DANRE RAB11-binding protein RELCH homolog OS=Danio rerio OX=7955 GN=relch PE=2 SV=1
contig_7dpi0457658	1.78466	SPKAP_DANRE A-kinase anchor protein SPHKAP OS=Danio rerio OX=7955 GN=sphkap PE=3 SV=1
contig_7dpi0012655	4.16242e-14	ACBD6_DANRE Acyl-CoA-binding domain-containing protein 6 OS=Danio rerio OX=7955 GN=acbd6 PE=2 SV=1
contig_7dpi0005955	3.07686	P53_XIPHE Cellular tumor antigen p53 OS=Xiphophorus helleri OX=8084 GN=tp53 PE=2 SV=1
contig_7dpi0394798	2.30784	CAC1S_CYPCA Dihydropyridine-sensitive L-type skeletal muscle calcium channel subunit alpha-1 OS=Cyprinus carpio OX=7962 PE=2 SV=1
contig_7dpi0001883	3.33424e-37	LMOD3_DANRE Leiomodin-3 OS=Danio rerio OX=7955 GN=lmod3 PE=1 SV=1
contig_7dpi0350954	8.22506e-09	RS15_XIPMA 40S ribosomal protein S15 OS=Xiphophorus maculatus OX=8083 GN=rps15 PE=2 SV=1
contig_7dpi0005315	1.73712e-08	FRIM_SALSA Ferritin, middle subunit OS=Salmo salar OX=8030 PE=2 SV=1
contig_7dpi0001271	4.17718	CNOT1_DANRE CCR4-NOT transcription complex subunit 1 OS=Danio rerio OX=7955 GN=cnot1 PE=2 SV=1
contig_7dpi0001389	2.5521	HV05_CARAU Ig heavy chain V region 5A OS=Carassius auratus OX=7957 PE=4 SV=1
contig_7dpi0002220	0	ATPB_CYPCA ATP synthase subunit beta, mitochondrial OS=Cyprinus carpio OX=7962 GN=ATP5F1B PE=2 SV=1
contig_7dpi0000050	1.60032	CC14A_DANRE Dual specificity protein phosphatase CDC14AB OS=Danio rerio OX=7955 GN=cdc14ab PE=3 SV=1
contig_7dpi0150408	1.21066	ZYG11_DANRE Protein zyg-11 homolog OS=Danio rerio OX=7955 GN=zyg11 PE=2 SV=1
contig_7dpi0181228	0.0830309	HSDL1_DANRE Inactive hydroxysteroid dehydrogenase-like protein 1 OS=Danio rerio OX=7955 GN=hsdl1 PE=2 SV=1
contig_7dpi0008636	0.0244528	SKAP2_TAKRU Src kinase-associated phosphoprotein 2 OS=Takifugu rubripes OX=31033 GN=skap2 PE=3 SV=1
contig_7dpi0001985	3.71084	MAP12_DANRE Methionine aminopeptidase 1D, mitochondrial OS=Danio rerio OX=7955 GN=metap1d PE=2 SV=1
contig_7dpi0008506	1.98422	HTR1B_DANRE Serine protease HTRA1B OS=Danio rerio OX=7955 GN=htra1b PE=2 SV=1
contig_7dpi0013899	1.18135	SRGP2_DANRE SLIT-ROBO Rho GTPase-activating protein 2 OS=Danio rerio OX=7955 GN=srgap2 PE=2 SV=1
contig_7dpi0048143	1.01557	FA92A_DANRE Protein FAM92A OS=Danio rerio OX=7955 GN=fam92a PE=2 SV=1
contig_7dpi0000423	0.651232	TEFM_DANRE Transcription elongation factor, mitochondrial OS=Danio rerio OX=7955 GN=tefm PE=2 SV=2
contig_7dpi0003400	6.77071	VP35L_DANRE VPS35 endosomal protein sorting factor-like OS=Danio rerio OX=7955 GN=vps35l PE=2 SV=1
contig_7dpi0015351		not available
contig_7dpi0029404	0.196263	WDR11_DANRE WD repeat-containing protein 11 OS=Danio rerio OX=7955 GN=wdr11 PE=2 SV=1
contig_7dpi0006637	0	RIR2_DANRE Ribonucleoside-diphosphate reductase subunit M2 OS=Danio rerio OX=7955 GN=rrm2 PE=1 SV=1
contig_7dpi0027929	0.416385	ZCRB1_DANRE Zinc finger CCHC-type and RNA-binding motif-containing protein 1 OS=Danio rerio OX=7955 GN=zcrb1 PE=2 SV=1
contig_7dpi0237331	1.88844	RXRBA_DANRE Retinoic acid receptor RXR-beta-A OS=Danio rerio OX=7955 GN=rxrba PE=2 SV=1
contig_7dpi0221195	3.99199	COX2_DANRE Cytochrome c oxidase subunit 2 OS=Danio rerio OX=7955 GN=mt-co2 PE=3 SV=1
contig_7dpi0003368	0.847022	CCD25_DANRE Coiled-coil domain-containing protein 25 OS=Danio rerio OX=7955 GN=ccdc25 PE=1 SV=1
contig_7dpi0013846	2.97124e-06	RHOAA_DANRE Rho-related GTP-binding protein RhoA-A OS=Danio rerio OX=7955 GN=rhoaa PE=1 SV=1
contig_7dpi0016230	2.32159	KEP1B_DANRE Kelch-like ECH-associated protein 1B OS=Danio rerio OX=7955 GN=keap1b PE=1 SV=1
contig_7dpi0001986	1.44037	NPC2_DANRE NPC intracellular cholesterol transporter 2 OS=Danio rerio OX=7955 GN=npc2 PE=2 SV=1
contig_7dpi0346518	1.73221	CNOT1_DANRE CCR4-NOT transcription complex subunit 1 OS=Danio rerio OX=7955 GN=cnot1 PE=2 SV=1
contig_7dpi0000344	0.315847	ERC6L_DANRE DNA excision repair protein ERCC-6-like OS=Danio rerio OX=7955 GN=ercc6l PE=1 SV=1
contig_7dpi0003033	0.553688	S35A5_DANRE Probable UDP-sugar transporter protein SLC35A5 OS=Danio rerio OX=7955 GN=slc35a5 PE=2 SV=1
contig_7dpi0021875	0.814598	PLCX1_DANRE PI-PLC X domain-containing protein 1 OS=Danio rerio OX=7955 GN=plcxd1 PE=2 SV=1
contig_7dpi0003464		not available
contig_7dpi0006277	2.44664e-58	TBA_ONCKE Tubulin alpha chain OS=Oncorhynchus keta OX=8018 PE=2 SV=2
contig_7dpi0016021	5.48121	SSRA_ONCMY Translocon-associated protein subunit alpha OS=Oncorhynchus mykiss OX=8022 GN=ssr1 PE=2 SV=1
contig_7dpi0000434	0	TBB1_GADMO Tubulin beta-1 chain OS=Gadus morhua OX=8049 PE=2 SV=1
contig_7dpi0009324	6.3911	MYPR_ONCMY Myelin proteolipid protein OS=Oncorhynchus mykiss OX=8022 GN=plp PE=2 SV=1
contig_7dpi0017557	4.25804e-18	LECG_THANI Galactose-specific lectin nattectin OS=Thalassophryne nattereri OX=289382 PE=1 SV=1
contig_7dpi0003504	2.29008	MNS1_DANRE Meiosis-specific nuclear structural protein 1 OS=Danio rerio OX=7955 GN=mns1 PE=2 SV=1
contig_7dpi0005447	0.74564	NU3M_PAROL NADH-ubiquinone oxidoreductase chain 3 OS=Paralichthys olivaceus OX=8255 GN=MT-ND3 PE=3 SV=2
contig_7dpi0013904	0.502443	ENY2A_SALSA Transcription and mRNA export factor ENY2-1 OS=Salmo salar OX=8030 GN=eny2-1 PE=3 SV=1
contig_7dpi0013637		not available
contig_7dpi0088643	0.223844	PPR37_DANRE Protein phosphatase 1 regulatory subunit 37 OS=Danio rerio OX=7955 GN=ppp1r37 PE=2 SV=1
contig_7dpi0017333	1.66707	TGFB1_ONCMY Transforming growth factor beta-1 proprotein OS=Oncorhynchus mykiss OX=8022 GN=tgfb1 PE=2 SV=1
contig_7dpi0006405	0.142718	TXTPB_DANRE Tricarboxylate transport protein B, mitochondrial OS=Danio rerio OX=7955 GN=slc25a1b PE=3 SV=2
contig_7dpi0006169	4.58357	R213A_DANRE E3 ubiquitin-protein ligase rnf213-alpha OS=Danio rerio OX=7955 GN=rnf213a PE=3 SV=1
contig_7dpi0019538	0.882359	ELP5_DANRE Elongator complex protein 5 OS=Danio rerio OX=7955 GN=elp5 PE=2 SV=1
contig_7dpi0002887	4.21526e-107	SELTA_DANRE Thioredoxin reductase-like selenoprotein T1a OS=Danio rerio OX=7955 GN=selenot1a PE=2 SV=3
contig_7dpi0011386	0.000529708	RUXE_DANRE Small nuclear ribonucleoprotein E OS=Danio rerio OX=7955 GN=snrpe PE=3 SV=1
contig_7dpi0069051		not available
contig_7dpi0034825	1.24771	SOMA_SPAAU Somatotropin OS=Sparus aurata OX=8175 GN=gh PE=2 SV=3
contig_7dpi0004385	4.10251e-09	LADD_ONCMY Ladderlectin OS=Oncorhynchus mykiss OX=8022 PE=1 SV=2
contig_7dpi0005710	4.76266e-46	BAF_DANRE Barrier-to-autointegration factor OS=Danio rerio OX=7955 GN=banf1 PE=1 SV=1
contig_7dpi0005645	3.10516	CLAP2_DANRE CLIP-associating protein 2 OS=Danio rerio OX=7955 GN=clasp2 PE=2 SV=1
contig_7dpi0335740	4.94162	DI2BA_DANRE Disco-interacting protein 2 homolog B-A OS=Danio rerio OX=7955 GN=dip2ba PE=2 SV=1
contig_7dpi0003036	1.60457e-43	TCPD_TAKRU T-complex protein 1 subunit delta OS=Takifugu rubripes OX=31033 GN=cct4 PE=2 SV=1
contig_7dpi0054498	0.177004	SRRM4_DANRE Serine/arginine repetitive matrix protein 4 OS=Danio rerio OX=7955 GN=srrm4 PE=2 SV=1
contig_7dpi0250945	0.541845	FGR1A_DANRE Fibroblast growth factor receptor 1-A OS=Danio rerio OX=7955 GN=fgfr1a PE=1 SV=2
contig_7dpi0006260	2.96896	MYSS_CYPCA Myosin heavy chain, fast skeletal muscle OS=Cyprinus carpio OX=7962 PE=2 SV=2
contig_7dpi0016680		not available
contig_7dpi0241606	1.93454	DISP2_DANRE Protein dispatched homolog 2 OS=Danio rerio OX=7955 GN=disp2 PE=2 SV=1
contig_7dpi0005362	6.78124e-46	FEV_DANRE Protein FEV OS=Danio rerio OX=7955 GN=fev PE=2 SV=1
contig_7dpi0009117	6.80473	MPPE1_DANRE Metallophosphoesterase 1 OS=Danio rerio OX=7955 GN=mppe1 PE=2 SV=1
contig_7dpi0001174	1.62986	IGF2_ONCMY Insulin-like growth factor II OS=Oncorhynchus mykiss OX=8022 GN=igf2 PE=2 SV=1
contig_7dpi0012994	1.7094	TMPPE_DANRE Transmembrane protein with metallophosphoesterase domain OS=Danio rerio OX=7955 GN=tmppe PE=2 SV=1
contig_7dpi0007531	4.81735e-11	CX5B2_ONCMY Cytochrome c oxidase subunit 5B liver, mitochondrial (Fragment) OS=Oncorhynchus mykiss OX=8022 PE=1 SV=1
contig_7dpi0000015	1.85245	L1CA1_DANRE Neural cell adhesion molecule L1.1 (Fragment) OS=Danio rerio OX=7955 GN=nadl1.1 PE=2 SV=1
contig_7dpi0008132	3.17478e-104	CALM_ONCSP Calmodulin OS=Oncorhynchus sp. OX=8025 GN=calm PE=1 SV=2
contig_7dpi0006370	6.29201e-71	G3P_ONCMY Glyceraldehyde-3-phosphate dehydrogenase OS=Oncorhynchus mykiss OX=8022 GN=gapdh PE=2 SV=1
contig_7dpi0015134	0.0336913	NOS2_CARAU Nitric oxide synthase, inducible (Fragment) OS=Carassius auratus OX=7957 GN=nos2 PE=2 SV=1
contig_7dpi0054100	1.00679e-13	HBA4_ONCMY Hemoglobin subunit alpha-4 OS=Oncorhynchus mykiss OX=8022 GN=hba4 PE=1 SV=1
contig_7dpi0046913	0.178399	TRIO_DANRE Triple functional domain protein OS=Danio rerio OX=7955 GN=trio PE=3 SV=1
contig_7dpi0018307	1.55773e-59	CH10_ORYLA 10 kDa heat shock protein, mitochondrial OS=Oryzias latipes OX=8090 GN=hspe1 PE=3 SV=1
contig_7dpi0008059	4.8067e-39	COX41_THUOB Cytochrome c oxidase subunit 4 isoform 1, mitochondrial OS=Thunnus obesus OX=8241 PE=2 SV=1
contig_7dpi0070010	0.398181	BTBBA_DANRE Ankyrin repeat and BTB/POZ domain-containing protein BTBD11-A OS=Danio rerio OX=7955 GN=btbd11a PE=3 SV=2
contig_7dpi0002047	4.76239e-55	OAZ2_DANRE Ornithine decarboxylase antizyme 2 OS=Danio rerio OX=7955 GN=oaz1b PE=2 SV=1
contig_7dpi0000115		not available
contig_7dpi0009852	0.629635	MFD4A_DANRE Major facilitator superfamily domain-containing protein 4A OS=Danio rerio OX=7955 GN=mfsd4a PE=2 SV=1
contig_7dpi0001305	3.81894e-36	ATF1A_DANRE ATPase inhibitor A, mitochondrial OS=Danio rerio OX=7955 GN=atp5if1a PE=3 SV=1
contig_7dpi0011092	5.83047e-132	UCP2_CYPCA Mitochondrial uncoupling protein 2 OS=Cyprinus carpio OX=7962 GN=ucp2 PE=2 SV=1
contig_7dpi0075630		not available
contig_7dpi0027059	2.01174	TBX6L_DANRE T-box transcription factor TBX6L OS=Danio rerio OX=7955 GN=tbx6l PE=2 SV=1
contig_7dpi0268756	1.26241e-15	RS6_ONCMY 40S ribosomal protein S6 OS=Oncorhynchus mykiss OX=8022 GN=rps6 PE=2 SV=1
contig_7dpi0004607	1.5793e-05	MMP21_DANRE Matrix metallopeptidase-21 OS=Danio rerio OX=7955 GN=mmp21 PE=2 SV=2
contig_7dpi0002051	0.858987	DLLB_DANRE Delta-like protein B OS=Danio rerio OX=7955 GN=dlb PE=1 SV=1
contig_7dpi0029829		not available
contig_7dpi0042909	0.111345	RN152_DANRE E3 ubiquitin-protein ligase rnf152 OS=Danio rerio OX=7955 GN=rnf152 PE=2 SV=1
contig_7dpi0000986	5.42393e-34	RS27A_ICTPU Ubiquitin-40S ribosomal protein S27a OS=Ictalurus punctatus OX=7998 GN=rps27a PE=2 SV=2
contig_7dpi0003023	0	G3P_DANRE Glyceraldehyde-3-phosphate dehydrogenase OS=Danio rerio OX=7955 GN=gapdh PE=2 SV=2
contig_7dpi0018237	1.15297	B4GA1_DANRE Beta-1,4-glucuronyltransferase 1 OS=Danio rerio OX=7955 GN=b4gat1 PE=2 SV=1
contig_7dpi0020515	6.9449	PACN1_DANRE Protein kinase C and casein kinase substrate in neurons protein 1 OS=Danio rerio OX=7955 GN=pacsin1b PE=1 SV=1
contig_7dpi0000062	1.87722e-43	TCPD_TAKRU T-complex protein 1 subunit delta OS=Takifugu rubripes OX=31033 GN=cct4 PE=2 SV=1
contig_7dpi0001804	2.76359	SRGP2_DANRE SLIT-ROBO Rho GTPase-activating protein 2 OS=Danio rerio OX=7955 GN=srgap2 PE=2 SV=1
contig_7dpi0011628	1.06615	DLLA_DANRE Delta-like protein A OS=Danio rerio OX=7955 GN=dla PE=1 SV=1
contig_7dpi0088373	3.67319	SHFL_DANRE Shiftless antiviral inhibitor of ribosomal frameshifting protein homolog OS=Danio rerio OX=7955 GN=shfl PE=2 SV=1
contig_7dpi0010100	1.97375	CRBN_DANRE Protein cereblon OS=Danio rerio OX=7955 GN=crbn PE=1 SV=1
contig_7dpi0006187	0.0606017	HTR5A_DANRE HEAT repeat-containing protein 5A OS=Danio rerio OX=7955 GN=heatr5a PE=2 SV=1
contig_7dpi0000783	2.41573	TBC23_DANRE TBC1 domain family member 23 OS=Danio rerio OX=7955 GN=tbc1d23 PE=2 SV=1
contig_7dpi0010530	7.91603e-17	CYTB_OPLFA Cystatin-B OS=Oplegnathus fasciatus OX=163134 PE=2 SV=1
contig_7dpi0001069	4.16861	C19L1_DANRE CWF19-like protein 1 OS=Danio rerio OX=7955 GN=cwf19l1 PE=2 SV=1
contig_7dpi0009038	2.60599e-23	DDX20_DANRE Probable ATP-dependent RNA helicase DDX20 OS=Danio rerio OX=7955 GN=ddx20 PE=3 SV=1
contig_7dpi0017254	0.680818	TET5C_DANRE Terminal nucleotidyltransferase 5C OS=Danio rerio OX=7955 GN=tent5c PE=2 SV=1
contig_7dpi0011328	3.52125	CYTSA_TAKRU Cytospin-A OS=Takifugu rubripes OX=31033 GN=specc1l PE=2 SV=1
contig_7dpi0000911	1.49236e-08	THIO_ICTPU Thioredoxin OS=Ictalurus punctatus OX=7998 GN=txn PE=3 SV=1
contig_7dpi0006417	0.318867	SPAT2_DANRE Spermatogenesis-associated protein 2 OS=Danio rerio OX=7955 GN=spata2 PE=2 SV=1
contig_7dpi0005844	0.73738	HPPD_DANRE 4-hydroxyphenylpyruvate dioxygenase OS=Danio rerio OX=7955 GN=hpd PE=2 SV=1
contig_7dpi0005491	6.31946e-50	ABRAL_SALSA Costars family protein ABRACL OS=Salmo salar OX=8030 PE=3 SV=1
contig_7dpi0008216	0.304541	RUXE_DANRE Small nuclear ribonucleoprotein E OS=Danio rerio OX=7955 GN=snrpe PE=3 SV=1
contig_7dpi0004515	1.48115	FIP1_DANRE Pre-mRNA 3'-end-processing factor FIP1 OS=Danio rerio OX=7955 GN=fip1l1 PE=1 SV=1
contig_7dpi0003208	1.71297e-116	AT1A1_CATCO Sodium/potassium-transporting ATPase subunit alpha-1 OS=Catostomus commersonii OX=7971 GN=atp1a1 PE=2 SV=1
contig_7dpi0014626	0.594513	NIPS2_DANRE Protein NipSnap homolog 2 OS=Danio rerio OX=7955 GN=nipsnap2 PE=2 SV=2
contig_7dpi0019304	0.890473	NUP85_DANRE Nuclear pore complex protein Nup85 OS=Danio rerio OX=7955 GN=nup85 PE=2 SV=1
contig_7dpi0034452	2.53875	STXA_SYNVE Neoverrucotoxin subunit alpha OS=Synanceia verrucosa OX=51996 PE=1 SV=1
contig_7dpi0007647	7.16606	OTOL1_ONCKE Otolin-1 OS=Oncorhynchus keta OX=8018 GN=otol1 PE=1 SV=1
contig_7dpi0001198	3.56912	BN3D2_DANRE Pre-miRNA 5'-monophosphate methyltransferase OS=Danio rerio OX=7955 GN=bcdin3d PE=3 SV=2
contig_7dpi0002707	2.13002	UBR3_DANRE E3 ubiquitin-protein ligase ubr3 OS=Danio rerio OX=7955 GN=ubr3 PE=2 SV=2
contig_7dpi0002654	2.93319	PAXI1_DANRE PAX-interacting protein 1 OS=Danio rerio OX=7955 GN=paxip1 PE=2 SV=1
contig_7dpi0004248	1.92122e-07	SPAG1_DANRE Sperm-associated antigen 1A OS=Danio rerio OX=7955 GN=spag1a PE=2 SV=1
contig_7dpi0110403	1.03148e-14	RL37A_ICTPU 60S ribosomal protein L37a OS=Ictalurus punctatus OX=7998 GN=rpl37a PE=3 SV=3
contig_7dpi0159184	1.01943e-16	RS7_TAKRU 40S ribosomal protein S7 OS=Takifugu rubripes OX=31033 GN=rps7 PE=3 SV=1
contig_7dpi0007504	2.49502	MTX3_DANRE Metaxin-3 OS=Danio rerio OX=7955 GN=mtx3 PE=2 SV=2
contig_7dpi0013480		not available
contig_7dpi0028820	1.822	SRBP2_DANRE Sterol regulatory element-binding protein 2 OS=Danio rerio OX=7955 GN=srebf2 PE=2 SV=1
contig_7dpi0005093	0.565313	BOP1_DANRE Ribosome biogenesis protein bop1 OS=Danio rerio OX=7955 GN=bop1 PE=2 SV=1
contig_7dpi0146493	1.38984e-19	RS12_ORENI 40S ribosomal protein S12 OS=Oreochromis niloticus OX=8128 GN=rps12 PE=2 SV=3
contig_7dpi0002152	0.322639	SMRDA_DANRE SWI/SNF-related matrix-associated actin-dependent regulator of chromatin subfamily A containing DEAD/H box 1A OS=Danio rerio OX=7955 GN=smarcad1a PE=3 SV=1
contig_7dpi0013468	6.05644	CNO10_DANRE CCR4-NOT transcription complex subunit 10 OS=Danio rerio OX=7955 GN=cnot10 PE=2 SV=1
contig_7dpi0036842	6.03623	TDRD1_DANRE Tudor domain-containing protein 1 OS=Danio rerio OX=7955 GN=tdrd1 PE=1 SV=2
contig_7dpi0045656	0.871366	HAUS6_DANRE HAUS augmin-like complex subunit 6 OS=Danio rerio OX=7955 GN=haus6 PE=2 SV=1
contig_7dpi0009419	6.6867	MYCB2_DANRE E3 ubiquitin-protein ligase MYCBP2 OS=Danio rerio OX=7955 GN=mycbp2 PE=2 SV=1
contig_7dpi0002271	3.65352	PD10A_DANRE Programmed cell death protein 10-A OS=Danio rerio OX=7955 GN=pdcd10a PE=1 SV=2
contig_7dpi0011844	0.546181	CTNB1_DANRE Catenin beta-1 OS=Danio rerio OX=7955 GN=ctnnb1 PE=1 SV=1
contig_7dpi0008048	0.910565	WSB1_TAKRU WD repeat and SOCS box-containing protein 1 OS=Takifugu rubripes OX=31033 GN=wsb1 PE=2 SV=1
contig_7dpi0012589	2.28259	PHLA2_SALSA Pleckstrin homology-like domain family A member 2 OS=Salmo salar OX=8030 GN=phlda2 PE=2 SV=1
contig_7dpi0004243	1.32696	CCD22_DANRE Coiled-coil domain-containing protein 22 OS=Danio rerio OX=7955 GN=ccdc22 PE=2 SV=1
contig_7dpi0386880	2.35599	ISOC1_DANRE Isochorismatase domain-containing protein 1 OS=Danio rerio OX=7955 GN=isoc1 PE=2 SV=1
contig_7dpi0019239	2.5255	TDRD1_DANRE Tudor domain-containing protein 1 OS=Danio rerio OX=7955 GN=tdrd1 PE=1 SV=2
contig_7dpi0020861	7.28207e-77	RBX1_SALSA RING-box protein 1 OS=Salmo salar OX=8030 GN=rbx1 PE=2 SV=2
contig_7dpi0017575	2.31674	TYW2_DANRE tRNA wybutosine-synthesizing protein 2 homolog OS=Danio rerio OX=7955 GN=trmt12 PE=2 SV=1
contig_7dpi0036804	3.23924	NDUF5_DANRE Arginine-hydroxylase NDUFAF5, mitochondrial OS=Danio rerio OX=7955 GN=ndufaf5 PE=2 SV=1
contig_7dpi0044675	0.734357	LETM1_DANRE Mitochondrial proton/calcium exchanger protein OS=Danio rerio OX=7955 GN=letm1 PE=3 SV=2
contig_7dpi0022957	0.00694904	RAN_SALSA GTP-binding nuclear protein Ran OS=Salmo salar OX=8030 GN=ran PE=2 SV=1
contig_7dpi0005946	2.62257	PDK1L_DANRE Serine/threonine-protein kinase pdik1l OS=Danio rerio OX=7955 GN=pdik1l PE=2 SV=1
contig_7dpi0003013	8.39562e-10	RSSA_SALSA 40S ribosomal protein SA OS=Salmo salar OX=8030 GN=rpsa PE=2 SV=1
contig_7dpi0011630	0.238756	BROMI_DANRE Protein broad-minded OS=Danio rerio OX=7955 GN=tbc1d32 PE=3 SV=2
contig_7dpi0009106	0	AT1A3_OREMO Sodium/potassium-transporting ATPase subunit alpha-3 OS=Oreochromis mossambicus OX=8127 GN=atp1a3 PE=2 SV=1
contig_7dpi0003875	5.61534e-35	CATD_CHIHA Cathepsin D OS=Chionodraco hamatus OX=36188 GN=ctsd PE=1 SV=2
contig_7dpi0008524		not available
contig_7dpi0006010	1.38025e-23	EIF3H_SALSA Eukaryotic translation initiation factor 3 subunit H OS=Salmo salar OX=8030 GN=eif3h PE=2 SV=1
contig_7dpi0011373	5.63744e-151	EIF3K_DANRE Eukaryotic translation initiation factor 3 subunit K OS=Danio rerio OX=7955 GN=eif3k PE=2 SV=1
contig_7dpi0005488		not available
contig_7dpi0001843	2.4387e-41	COX6A_ONCMY Cytochrome c oxidase subunit 6A, mitochondrial OS=Oncorhynchus mykiss OX=8022 PE=3 SV=1
contig_7dpi0004760	0.21626	MD13L_DANRE Mediator of RNA polymerase II transcription subunit 13-like OS=Danio rerio OX=7955 GN=zgc:153454 PE=2 SV=1
contig_7dpi0010157	2.13971e-32	KAD2_DANRE Adenylate kinase 2, mitochondrial OS=Danio rerio OX=7955 GN=ak2 PE=2 SV=1
contig_7dpi0014591	0.0447553	SAM5A_DANRE Sorting and assembly machinery component 50 homolog A OS=Danio rerio OX=7955 GN=samm50a PE=2 SV=1
contig_7dpi0030547	1.22971	RHBG_ORYLA Ammonium transporter Rh type B OS=Oryzias latipes OX=8090 GN=rhbg PE=2 SV=1
contig_7dpi0068466		not available
contig_7dpi0016164	6.57977	FA53B_DANRE Protein FAM53B OS=Danio rerio OX=7955 GN=fam53b PE=1 SV=1
contig_7dpi0022270	0.724247	CP1A1_OPSTA Cytochrome P450 1A1 OS=Opsanus tau OX=8068 GN=cyp1a1 PE=2 SV=1
contig_7dpi0002701	2.29385	MYCB2_DANRE E3 ubiquitin-protein ligase MYCBP2 OS=Danio rerio OX=7955 GN=mycbp2 PE=2 SV=1
contig_7dpi0004096	3.37217	NAA60_DANRE N-alpha-acetyltransferase 60 OS=Danio rerio OX=7955 GN=naa60 PE=2 SV=1
contig_7dpi0096477	1.52227	CATIN_DANRE Cactin OS=Danio rerio OX=7955 GN=cactin PE=2 SV=1
contig_7dpi0003081	0.391397	IF6_DANRE Eukaryotic translation initiation factor 6 OS=Danio rerio OX=7955 GN=eif6 PE=2 SV=1
contig_7dpi0004438	0.000867682	GPX8_DANRE Probable glutathione peroxidase 8 OS=Danio rerio OX=7955 GN=gpx8 PE=2 SV=1
contig_7dpi0008759	1.22123	Z687B_DANRE Zinc finger protein 687b OS=Danio rerio OX=7955 GN=znf687b PE=2 SV=1
contig_7dpi0041575	3.09038	RUVB2_DANRE RuvB-like 2 OS=Danio rerio OX=7955 GN=ruvbl2 PE=1 SV=1
contig_7dpi0012765	3.66961e-56	TERA_DANRE Transitional endoplasmic reticulum ATPase OS=Danio rerio OX=7955 GN=vcp PE=1 SV=1
contig_7dpi0030106	1.56649	NAV3_DANRE Neuron navigator 3 OS=Danio rerio OX=7955 GN=nav3 PE=3 SV=1
contig_7dpi0000413	0.641318	HBA1_GOBGI Hemoglobin subunit alpha-1 OS=Gobionotothen gibberifrons OX=36202 GN=hba1 PE=1 SV=1
contig_7dpi0006793	6.4137e-73	TBB1_GADMO Tubulin beta-1 chain OS=Gadus morhua OX=8049 PE=2 SV=1
contig_7dpi0007524	1.87169e-07	PTPRC_CYPCA Receptor-type tyrosine-protein phosphatase C OS=Cyprinus carpio OX=7962 GN=ptprc PE=2 SV=1
contig_7dpi0007646	1.19582	CMTR1_DANRE Cap-specific mRNA (nucleoside-2'-O-)-methyltransferase 1 OS=Danio rerio OX=7955 GN=cmtr1 PE=2 SV=1
contig_7dpi0230278	2.19847	COLI2_CYPCA Pro-opiomelanocortin-2 OS=Cyprinus carpio OX=7962 GN=pomcb PE=2 SV=1
contig_7dpi0013881	3.42182e-13	PACN1_DANRE Protein kinase C and casein kinase substrate in neurons protein 1 OS=Danio rerio OX=7955 GN=pacsin1b PE=1 SV=1
contig_7dpi0004898	1.22957e-11	UQCC2_DANRE Ubiquinol-cytochrome-c reductase complex assembly factor 2 OS=Danio rerio OX=7955 GN=uqcc2 PE=2 SV=1
contig_7dpi0029401	0.212798	SYFA_DANRE Phenylalanine--tRNA ligase alpha subunit OS=Danio rerio OX=7955 GN=farsa PE=2 SV=2
contig_7dpi0006653	6.89897	RTEL1_DANRE Regulator of telomere elongation helicase 1 OS=Danio rerio OX=7955 GN=rtel1 PE=3 SV=1
contig_7dpi0011603	2.2173	FOXH1_DANRE Forkhead box protein H1 OS=Danio rerio OX=7955 GN=foxh1 PE=1 SV=1
contig_7dpi0002234	0.476079	PPM1H_DANRE Protein phosphatase 1H OS=Danio rerio OX=7955 GN=ppm1h PE=2 SV=1
contig_7dpi0001952	1.11207e-40	PSA7_CARAU Proteasome subunit alpha type-7 OS=Carassius auratus OX=7957 GN=psma7 PE=2 SV=1
contig_7dpi0009110	1.93137e-17	PTPRF_DANRE Receptor-type tyrosine-protein phosphatase F OS=Danio rerio OX=7955 GN=ptprf PE=2 SV=1
contig_7dpi0008081	0.0508914	GSTA_PLEPL Glutathione S-transferase A OS=Pleuronectes platessa OX=8262 PE=2 SV=1
contig_7dpi0000909	1.17653	GT251_DANRE Procollagen galactosyltransferase 1 OS=Danio rerio OX=7955 GN=colgalt1 PE=3 SV=1
contig_7dpi0384282	0.211238	SCNA_ELEEL Sodium channel protein OS=Electrophorus electricus OX=8005 PE=1 SV=1
contig_7dpi0016213	6.99137	LIAS_DANRE Lipoyl synthase, mitochondrial OS=Danio rerio OX=7955 GN=lias PE=2 SV=1
contig_7dpi0010191	2.55711	THS7A_DANRE Thrombospondin type-1 domain-containing protein 7A OS=Danio rerio OX=7955 GN=thsd7aa PE=1 SV=2
contig_7dpi0007193	1.22974e-16	TCPD_TAKRU T-complex protein 1 subunit delta OS=Takifugu rubripes OX=31033 GN=cct4 PE=2 SV=1
contig_7dpi0008592	2.97289e-26	PSB9_SALSA Proteasome subunit beta type-9 OS=Salmo salar OX=8030 GN=psmb9-a PE=2 SV=1
contig_7dpi0267420	0.617548	COPG2_TAKRU Coatomer subunit gamma-2 OS=Takifugu rubripes OX=31033 GN=copg2 PE=3 SV=1
contig_7dpi0012294	2.50938e-17	LRMP_DANRE Lymphoid-restricted membrane protein OS=Danio rerio OX=7955 GN=lrmp PE=1 SV=2
contig_7dpi0023598	4.23681	ZYG11_DANRE Protein zyg-11 homolog OS=Danio rerio OX=7955 GN=zyg11 PE=2 SV=1
contig_7dpi0000058	0.657039	PRD10_DANRE PR domain zinc finger protein 10 OS=Danio rerio OX=7955 GN=prdm10 PE=3 SV=2
contig_7dpi0002523		not available
contig_7dpi0031662	5.23623	HEPC_MORCS Hepcidin OS=Morone chrysops x Morone saxatilis OX=45352 GN=hamp PE=1 SV=1
contig_7dpi0000049	3.29263	KC2D2_DANRE Calcium/calmodulin-dependent protein kinase type II delta 2 chain OS=Danio rerio OX=7955 GN=camk2d2 PE=2 SV=2
contig_7dpi0001604		not available
contig_7dpi0000114	2.84743	FUT11_ORYLA Alpha-(1,3)-fucosyltransferase 11 OS=Oryzias latipes OX=8090 GN=fut11 PE=2 SV=1
contig_7dpi0018998	5.82626	TICRR_DANRE Treslin OS=Danio rerio OX=7955 GN=ticrr PE=2 SV=1
contig_7dpi0041411	1.3545	RMI1_DANRE RecQ-mediated genome instability protein 1 OS=Danio rerio OX=7955 GN=rmi1 PE=2 SV=1
contig_7dpi0034046	0.358315	STRP1_DANRE Striatin-interacting protein 1 homolog OS=Danio rerio OX=7955 GN=strip1 PE=1 SV=1
contig_7dpi0057320	0.425535	PCX1_TAKRU Pecanex-like protein 1 OS=Takifugu rubripes OX=31033 GN=pcnx1 PE=3 SV=1
contig_7dpi0002274	9.04143e-13	LECG_THANI Galactose-specific lectin nattectin OS=Thalassophryne nattereri OX=289382 PE=1 SV=1
contig_7dpi0019182	5.38776	DDX20_DANRE Probable ATP-dependent RNA helicase DDX20 OS=Danio rerio OX=7955 GN=ddx20 PE=3 SV=1
contig_7dpi0003667	7.59176e-25	AB1IP_DANRE Amyloid beta A4 precursor protein-binding family B member 1-interacting protein OS=Danio rerio OX=7955 GN=apbb1ip PE=2 SV=1
contig_7dpi0007373		not available
contig_7dpi0004984	1.21585e-06	SH3R1_DANRE E3 ubiquitin-protein ligase SH3RF1 OS=Danio rerio OX=7955 GN=sh3rf1 PE=2 SV=2
contig_7dpi0057228	5.6067	TRFE_ORYLA Serotransferrin OS=Oryzias latipes OX=8090 GN=tf PE=3 SV=1
contig_7dpi0026153	0.0918119	AGRA3_DANRE Adhesion G protein-coupled receptor A3 OS=Danio rerio OX=7955 GN=adgra3 PE=1 SV=1
contig_7dpi0010775	0.291923	UN45B_DANRE Protein unc-45 homolog B OS=Danio rerio OX=7955 GN=unc45b PE=1 SV=2
contig_7dpi0019984	1.8367e-05	ASC_DANRE Apoptosis-associated speck-like protein containing a CARD OS=Danio rerio OX=7955 GN=pycard PE=1 SV=1
contig_7dpi0002518	0.635353	CLPT1_DANRE Cleft lip and palate transmembrane protein 1 homolog OS=Danio rerio OX=7955 GN=clptm1 PE=2 SV=1
contig_7dpi0003723	7.72212	BOP1_DANRE Ribosome biogenesis protein bop1 OS=Danio rerio OX=7955 GN=bop1 PE=2 SV=1
contig_7dpi0009828	4.15382	ACSF2_DANRE Medium-chain acyl-CoA ligase ACSF2, mitochondrial OS=Danio rerio OX=7955 GN=acsf2 PE=2 SV=1
contig_7dpi0035223	1.9753	SHA9A_DANRE Protein shisa-9A OS=Danio rerio OX=7955 GN=shisa9a PE=2 SV=1
contig_7dpi0013050	0.349238	HACE1_DANRE E3 ubiquitin-protein ligase HACE1 OS=Danio rerio OX=7955 GN=hace1 PE=3 SV=2
contig_7dpi0017508	0.613497	UB2V2_DANRE Ubiquitin-conjugating enzyme E2 variant 2 OS=Danio rerio OX=7955 GN=ube2v2 PE=2 SV=1
contig_7dpi0003492	1.14988e-65	H2AV_DANRE Histone H2A.V OS=Danio rerio OX=7955 GN=h2afv PE=2 SV=3
contig_7dpi0033000	1.31131	CRAD_DANRE Cancer-related regulator of actin dynamics homolog OS=Danio rerio OX=7955 GN=crad PE=3 SV=3
contig_7dpi0008088	0.210777	PSB3_ONCMY Proteasome subunit beta type-3 OS=Oncorhynchus mykiss OX=8022 GN=psmb3 PE=2 SV=1
contig_7dpi0015760	0.0088813	FRIM_SALSA Ferritin, middle subunit OS=Salmo salar OX=8030 PE=2 SV=1
contig_7dpi0034943	1.78381	STAU2_DANRE Double-stranded RNA-binding protein Staufen homolog 2 OS=Danio rerio OX=7955 GN=stau2 PE=2 SV=2
contig_7dpi0058227	1.96769	CEP63_DANRE Centrosomal protein of 63 kDa OS=Danio rerio OX=7955 GN=cep63 PE=2 SV=2
contig_7dpi0006360	2.43302e-05	H32_DANRE Histone H3.2 OS=Danio rerio OX=7955 GN=zgc:113984 PE=2 SV=3
contig_7dpi0020558	2.10092	KC1DB_DANRE Casein kinase I isoform delta-B OS=Danio rerio OX=7955 GN=csnk1db PE=2 SV=1
contig_7dpi0003367	5.73109	SOML_SIGGU Somatolactin OS=Siganus guttatus OX=92439 PE=2 SV=1
contig_7dpi0024521	8.35297e-08	APTX_DANRE Aprataxin OS=Danio rerio OX=7955 GN=aptx PE=2 SV=1
contig_7dpi0010674	2.83121	PYRD1_DANRE Pyridine nucleotide-disulfide oxidoreductase domain-containing protein 1 OS=Danio rerio OX=7955 GN=pyroxd1 PE=2 SV=1
contig_7dpi0006654	2.0267e-35	ATF1B_DANRE ATPase inhibitor B, mitochondrial OS=Danio rerio OX=7955 GN=atp5if1b PE=3 SV=1
contig_7dpi0093300	1.9347	RSAD2_SINCH Radical S-adenosyl methionine domain-containing protein 2 OS=Siniperca chuatsi OX=119488 GN=rsad2 PE=2 SV=1
contig_7dpi0043453	3.2849	CYTSA_DANRE Cytospin-A OS=Danio rerio OX=7955 GN=specc1la PE=2 SV=2
contig_7dpi0230664	1.58081e-07	RS7_TAKRU 40S ribosomal protein S7 OS=Takifugu rubripes OX=31033 GN=rps7 PE=3 SV=1
contig_7dpi0003458	0.429244	SMC5_TAKRU Structural maintenance of chromosomes protein 5 OS=Takifugu rubripes OX=31033 GN=smc5 PE=2 SV=1
contig_7dpi0012830	4.4636	SELT2_DANRE Selenoprotein T2 OS=Danio rerio OX=7955 GN=selenot2 PE=2 SV=3
contig_7dpi0012037	6.21121	STIL_DANRE SCL-interrupting locus protein homolog OS=Danio rerio OX=7955 GN=stil PE=1 SV=2
contig_7dpi0033898	0.433137	WNT11_DANRE Protein Wnt-11 OS=Danio rerio OX=7955 GN=wnt11 PE=2 SV=1
contig_7dpi0030818		not available
contig_7dpi0001934	1.01471e-35	LMOD3_DANRE Leiomodin-3 OS=Danio rerio OX=7955 GN=lmod3 PE=1 SV=1
contig_7dpi0199309	0.187083	SHP2A_DANRE Phosphatidylinositol 3,4,5-trisphosphate 5-phosphatase 2A OS=Danio rerio OX=7955 GN=inppl1a PE=2 SV=2
contig_7dpi0012177	0.230423	TRPM2_DANRE Transient receptor potential cation channel subfamily M member 2 OS=Danio rerio OX=7955 GN=trpm2 PE=1 SV=2
contig_7dpi0041406	0.486029	ABRX1_SALSA BRCA1-A complex subunit Abraxas 1 OS=Salmo salar OX=8030 GN=abraxas1 PE=2 SV=1
contig_7dpi0030819	1.62578	CDK15_DANRE Cyclin-dependent kinase 15 OS=Danio rerio OX=7955 GN=cdk15 PE=2 SV=1
contig_7dpi0011808	2.15745	NIPLB_DANRE Nipped-B-like protein B OS=Danio rerio OX=7955 GN=nipblb PE=2 SV=1
contig_7dpi0006327	2.01811	WSCD2_DANRE WSC domain-containing protein 2 OS=Danio rerio OX=7955 GN=wscd2 PE=3 SV=1
contig_7dpi0009542	9.64707e-39	EIF3D_DANRE Eukaryotic translation initiation factor 3 subunit D OS=Danio rerio OX=7955 GN=eif3d PE=2 SV=1
contig_7dpi0008374	0.572115	RHDF1_DANRE Inactive rhomboid protein 1 OS=Danio rerio OX=7955 GN=rhbdf1 PE=2 SV=1
contig_7dpi0006162	1.31863	TRI13_DANRE Tripartite motif-containing 13 OS=Danio rerio OX=7955 GN=trim13 PE=2 SV=1
contig_7dpi0008191	1.08302	T185L_DANRE Transmembrane protein 185-like OS=Danio rerio OX=7955 GN=zgc:63572 PE=2 SV=1
contig_7dpi0089632	2.72507	RAG1_DANRE V(D)J recombination-activating protein 1 OS=Danio rerio OX=7955 GN=rag1 PE=1 SV=1
contig_7dpi0011061	3.81711e-155	TPISB_DANRE Triosephosphate isomerase B OS=Danio rerio OX=7955 GN=tpi1b PE=2 SV=1
contig_7dpi0011682	1.28929	CRA1B_DANRE Collagen alpha-1(XXVII) chain B OS=Danio rerio OX=7955 GN=col27a1b PE=2 SV=1
contig_7dpi0000399	3.27262e-59	RL19_DANRE 60S ribosomal protein L19 OS=Danio rerio OX=7955 GN=rpl19 PE=2 SV=1
contig_7dpi0343887	0.670314	TWF2_DANRE Twinfilin-2 OS=Danio rerio OX=7955 GN=twf2 PE=2 SV=1
contig_7dpi0005120	5.15383	RFX6_DANRE DNA-binding protein RFX6 OS=Danio rerio OX=7955 GN=rfx6 PE=2 SV=2
contig_7dpi0000905	2.00393	TAF2_DANRE Transcription initiation factor TFIID subunit 2 OS=Danio rerio OX=7955 GN=taf2 PE=2 SV=2
contig_7dpi0007488	0	HSP71_ORYLA Heat shock 70 kDa protein 1 OS=Oryzias latipes OX=8090 PE=3 SV=1
contig_7dpi0425254	2.87016	TRM5_DANRE tRNA (guanine(37)-N1)-methyltransferase OS=Danio rerio OX=7955 GN=trmt5 PE=3 SV=1
contig_7dpi0012477	0.00116959	BATF_DANRE Basic leucine zipper transcriptional factor ATF-like OS=Danio rerio OX=7955 GN=batf PE=3 SV=1
contig_7dpi0004072	0.0390875	R213A_DANRE E3 ubiquitin-protein ligase rnf213-alpha OS=Danio rerio OX=7955 GN=rnf213a PE=3 SV=1
contig_7dpi0008396	1.49215	PI4KB_DANRE Phosphatidylinositol 4-kinase beta OS=Danio rerio OX=7955 GN=pi4kb PE=2 SV=2
contig_7dpi0028597	1.70986	ADA1A_ORYLA Alpha-1A adrenergic receptor OS=Oryzias latipes OX=8090 GN=adra1a PE=3 SV=1
contig_7dpi0020077	0.481813	CATA_DANRE Catalase OS=Danio rerio OX=7955 GN=cat PE=2 SV=1
contig_7dpi0001329	1.17055	CD123_DANRE Cell division cycle protein 123 homolog OS=Danio rerio OX=7955 GN=cdc123 PE=2 SV=1
contig_7dpi0007770	0.0547284	THB_PAROL Thyroid hormone receptor beta OS=Paralichthys olivaceus OX=8255 GN=thrb PE=2 SV=1
contig_7dpi0020461	7.69573	HD_TAKRU Huntingtin OS=Takifugu rubripes OX=31033 GN=htt PE=3 SV=1
contig_7dpi0005729	1.76864	TSH1_DANRE Teashirt homolog 1 OS=Danio rerio OX=7955 GN=tshz1 PE=2 SV=1
contig_7dpi0006583	0	IF2G_DANRE Eukaryotic translation initiation factor 2 subunit 3 OS=Danio rerio OX=7955 GN=eif2s3 PE=3 SV=1
contig_7dpi0010472	2.19991	S47A1_DANRE Multidrug and toxin extrusion protein 1 OS=Danio rerio OX=7955 GN=slc47a1 PE=2 SV=1
contig_7dpi0024657	2.29448e-40	NMT2_DANRE Glycylpeptide N-tetradecanoyltransferase 2 OS=Danio rerio OX=7955 GN=nmt2 PE=2 SV=2
contig_7dpi0015652	1.51698	CCNB1_ANGJA G2/mitotic-specific cyclin-B1 OS=Anguilla japonica OX=7937 GN=ccnb1 PE=2 SV=1
contig_7dpi0006576	2.47664	SOML_SIGGU Somatolactin OS=Siganus guttatus OX=92439 PE=2 SV=1
contig_7dpi0025969	1.87074	143B2_ONCMY 14-3-3 protein beta/alpha-2 OS=Oncorhynchus mykiss OX=8022 PE=2 SV=1
contig_7dpi0001242	8.07075	IF122_DANRE Intraflagellar transport protein 122 homolog OS=Danio rerio OX=7955 GN=ift122 PE=2 SV=1
contig_7dpi0105235	1.46864	ANP3_ZOAAM Ice-structuring protein lambda OP-3 OS=Zoarces americanus OX=8199 PE=3 SV=1
contig_7dpi0010966	1.39834e-129	HEM1_OPSTA 5-aminolevulinate synthase, nonspecific, mitochondrial OS=Opsanus tau OX=8068 GN=alas1 PE=2 SV=1
contig_7dpi0066811	0.745606	PIWL2_DANRE Piwi-like protein 2 OS=Danio rerio OX=7955 GN=piwil2 PE=1 SV=2
contig_7dpi0011664	1.16711e-132	CPSF5_DANRE Cleavage and polyadenylation specificity factor subunit 5 OS=Danio rerio OX=7955 GN=nudt21 PE=2 SV=1
contig_7dpi0005386		not available
contig_7dpi0174505	4.50722	INT3_DANRE Integrator complex subunit 3 OS=Danio rerio OX=7955 GN=ints3 PE=2 SV=1
contig_7dpi0011231		not available
contig_7dpi0005908	1.14788	STAU2_DANRE Double-stranded RNA-binding protein Staufen homolog 2 OS=Danio rerio OX=7955 GN=stau2 PE=2 SV=2
contig_7dpi0023205	3.89742	IOD1_FUNHE Type I iodothyronine deiodinase OS=Fundulus heteroclitus OX=8078 GN=dio1 PE=2 SV=2
contig_7dpi0041563	1.55145e-26	RHOAA_DANRE Rho-related GTP-binding protein RhoA-A OS=Danio rerio OX=7955 GN=rhoaa PE=1 SV=1
contig_7dpi0044076	1.18627	PTGIS_DANRE Prostacyclin synthase OS=Danio rerio OX=7955 GN=ptgis PE=1 SV=1
contig_7dpi0000768	4.26329e-175	TBB1_GADMO Tubulin beta-1 chain OS=Gadus morhua OX=8049 PE=2 SV=1
contig_7dpi0028676	3.94833	NR3BB_DANRE Neurexin-3b-beta OS=Danio rerio OX=7955 GN=nrxn3b PE=2 SV=1
contig_7dpi0001296	7.18941e-151	PSB3_ONCMY Proteasome subunit beta type-3 OS=Oncorhynchus mykiss OX=8022 GN=psmb3 PE=2 SV=1
contig_7dpi0002791	1.13544	MOXD2_DANRE DBH-like monooxygenase protein 2 homolog OS=Danio rerio OX=7955 GN=moxd2 PE=2 SV=2
contig_7dpi0024737	3.10228	ST2S2_DANRE Cytosolic sulfotransferase 2 OS=Danio rerio OX=7955 GN=sult1st2 PE=1 SV=1
contig_7dpi0348183	0.324955	NOTU2_DANRE Carboxylesterase notum2 OS=Danio rerio OX=7955 GN=notum2 PE=2 SV=1
contig_7dpi0007759	0.733178	CCNB1_CARAU G2/mitotic-specific cyclin-B1 OS=Carassius auratus OX=7957 GN=ccnb1 PE=2 SV=1
contig_7dpi0011609	0.958794	ANS1B_DANRE Ankyrin repeat and sterile alpha motif domain-containing protein 1B OS=Danio rerio OX=7955 GN=anks1b PE=3 SV=1
contig_7dpi0011372	1.07443e-153	EIF3K_DANRE Eukaryotic translation initiation factor 3 subunit K OS=Danio rerio OX=7955 GN=eif3k PE=2 SV=1
contig_7dpi0031027	2.93807	PF23A_DANRE PHD finger protein 23A OS=Danio rerio OX=7955 GN=phf23a PE=2 SV=1
contig_7dpi0008660	2.08438e-31	SRS1B_DANRE Serine/arginine-rich splicing factor 1B OS=Danio rerio OX=7955 GN=srsf1b PE=2 SV=1
contig_7dpi0015802	6.62429	VIT1_FUNHE Vitellogenin-1 OS=Fundulus heteroclitus OX=8078 GN=vtg1 PE=1 SV=2
contig_7dpi0037268	0.186484	BBS2_DANRE Bardet-Biedl syndrome 2 protein homolog OS=Danio rerio OX=7955 GN=bbs2 PE=2 SV=1
contig_7dpi0019962	0.0750557	PTH4_DANRE Parathyroid hormone 4 OS=Danio rerio OX=7955 GN=pth4 PE=2 SV=1
contig_7dpi0045773	0.878907	GLPK5_DANRE Putative glycerol kinase 5 OS=Danio rerio OX=7955 GN=gk5 PE=2 SV=1
contig_7dpi0076210		not available
contig_7dpi0014167	2.46205e-153	CDK1_CARAU Cyclin-dependent kinase 1 OS=Carassius auratus OX=7957 GN=cdk1 PE=2 SV=1
contig_7dpi0010298	8.82974	PACN1_DANRE Protein kinase C and casein kinase substrate in neurons protein 1 OS=Danio rerio OX=7955 GN=pacsin1b PE=1 SV=1
contig_7dpi0009910	0.265617	OPSG4_DANRE Green-sensitive opsin-4 OS=Danio rerio OX=7955 GN=opn1mw4 PE=1 SV=2
contig_7dpi0013552	0.633062	TGM2_PAGMA Protein-glutamine gamma-glutamyltransferase 2 OS=Pagrus major OX=143350 GN=tgl2 PE=1 SV=1
contig_7dpi0011598	1.3104e-19	PB6LA_SALSA Proteasome subunit beta type-6-A like protein OS=Salmo salar OX=8030 GN=psmb6l-a PE=3 SV=1
contig_7dpi0013363	9.32823	TIM50_DANRE Mitochondrial import inner membrane translocase subunit TIM50 OS=Danio rerio OX=7955 GN=timm50 PE=2 SV=2
contig_7dpi0057928	1.28591	ASCC3_DANRE Activating signal cointegrator 1 complex subunit 3 OS=Danio rerio OX=7955 GN=ascc3 PE=3 SV=2
contig_7dpi0008808	0.0845673	KT5AA_DANRE N-lysine methyltransferase KMT5A-A OS=Danio rerio OX=7955 GN=kmt5aa PE=2 SV=1
contig_7dpi0007217	0.0746943	NAA60_DANRE N-alpha-acetyltransferase 60 OS=Danio rerio OX=7955 GN=naa60 PE=2 SV=1
contig_7dpi0004440	6.39799	GRB1L_DANRE GREB1-like protein OS=Danio rerio OX=7955 GN=greb1l PE=2 SV=2
contig_7dpi0010521	2.88718	HXD4A_DANRE Homeobox protein Hox-D4a OS=Danio rerio OX=7955 GN=hoxd4a PE=2 SV=2
contig_7dpi0004424		not available
contig_7dpi0007082	0.538224	SHP2A_DANRE Phosphatidylinositol 3,4,5-trisphosphate 5-phosphatase 2A OS=Danio rerio OX=7955 GN=inppl1a PE=2 SV=2
contig_7dpi0018674	1.81682e-42	RNSL3_DANRE Ribonuclease-like 3 OS=Danio rerio OX=7955 GN=rnasel3 PE=1 SV=2
contig_7dpi0015716	5.89927e-26	PB6LA_SALSA Proteasome subunit beta type-6-A like protein OS=Salmo salar OX=8030 GN=psmb6l-a PE=3 SV=1
contig_7dpi0035993	3.46026	PURA2_DANRE Adenylosuccinate synthetase isozyme 2 OS=Danio rerio OX=7955 GN=adss2 PE=2 SV=1
contig_7dpi0297379	0.940124	CNR1A_TAKRU Cannabinoid receptor type 1A OS=Takifugu rubripes OX=31033 GN=cnr1a PE=3 SV=1
contig_7dpi0001859	7.24422e-94	EIF3E_SALSA Eukaryotic translation initiation factor 3 subunit E OS=Salmo salar OX=8030 GN=eif3e PE=2 SV=1
contig_7dpi0009853	1.39321e-98	FBX50_DANRE F-box only protein 50 OS=Danio rerio OX=7955 GN=nccrp1 PE=2 SV=2
contig_7dpi0031566	7.07381	XPO6_DANRE Exportin-6 OS=Danio rerio OX=7955 GN=xpo6 PE=2 SV=1
contig_7dpi0021665	4.60211	B4GA1_DANRE Beta-1,4-glucuronyltransferase 1 OS=Danio rerio OX=7955 GN=b4gat1 PE=2 SV=1
contig_7dpi0036860	2.1814	LDHA_ELEMC L-lactate dehydrogenase A chain OS=Eleginops maclovinus OX=56733 GN=ldha PE=2 SV=3
contig_7dpi0004562	1.03519	ATP23_DANRE Mitochondrial inner membrane protease ATP23 homolog OS=Danio rerio OX=7955 GN=atp23 PE=2 SV=1
contig_7dpi0224770	5.83145	GRK7B_DANRE Rhodopsin kinase grk7-b OS=Danio rerio OX=7955 GN=grk7b PE=1 SV=2
contig_7dpi0008079	3.76715e-07	FITM1_DANRE Fat storage-inducing transmembrane protein 1 OS=Danio rerio OX=7955 GN=fitm1 PE=2 SV=1
contig_7dpi0005858	1.73191e-12	SRS1B_DANRE Serine/arginine-rich splicing factor 1B OS=Danio rerio OX=7955 GN=srsf1b PE=2 SV=1
contig_7dpi0000248	1.26348e-54	LYG_PAROL Lysozyme g OS=Paralichthys olivaceus OX=8255 PE=1 SV=1
contig_7dpi0006141	1.05822	B4GA1_DANRE Beta-1,4-glucuronyltransferase 1 OS=Danio rerio OX=7955 GN=b4gat1 PE=2 SV=1
contig_7dpi0042725	1.00951	F149B_DANRE Protein FAM149B1 OS=Danio rerio OX=7955 GN=fam149b1 PE=2 SV=1
contig_7dpi0022633	0.473552	LRMP_DANRE Lymphoid-restricted membrane protein OS=Danio rerio OX=7955 GN=lrmp PE=1 SV=2
contig_7dpi0003714	0.603641	TAF2_DANRE Transcription initiation factor TFIID subunit 2 OS=Danio rerio OX=7955 GN=taf2 PE=2 SV=2
contig_7dpi0006424	5.1138e-19	ASC_DANRE Apoptosis-associated speck-like protein containing a CARD OS=Danio rerio OX=7955 GN=pycard PE=1 SV=1
contig_7dpi0025856	5.57182	CSF12_TAKRU Macrophage colony-stimulating factor 1 receptor 2 OS=Takifugu rubripes OX=31033 GN=csf1r2 PE=3 SV=1
contig_7dpi0028198	0.557514	AP2D_DANRE Transcription factor AP-2-delta OS=Danio rerio OX=7955 GN=tfap2d PE=2 SV=1
contig_7dpi0003578	8.34635e-42	SERP3_DANRE Probable serpin E3 OS=Danio rerio OX=7955 GN=serpine3 PE=3 SV=1
contig_7dpi0005059	8.34396	MYO1C_DANRE Unconventional myosin-Ic OS=Danio rerio OX=7955 GN=myo1c PE=3 SV=1
contig_7dpi0012164	0.0510483	MUCM_ICTPU Ig mu chain C region membrane-bound form OS=Ictalurus punctatus OX=7998 PE=2 SV=2
contig_7dpi0003245	5.89562	SRBP2_DANRE Sterol regulatory element-binding protein 2 OS=Danio rerio OX=7955 GN=srebf2 PE=2 SV=1
contig_7dpi0007010	6.42924	ERGI1_DANRE Endoplasmic reticulum-Golgi intermediate compartment protein 1 OS=Danio rerio OX=7955 GN=ergic1 PE=2 SV=1
contig_7dpi0018788	6.60962e-84	M1I1B_DANRE Mid1-interacting protein 1-B OS=Danio rerio OX=7955 GN=mid1ip1b PE=2 SV=1
contig_7dpi0005152	2.82713	NOTU2_DANRE Carboxylesterase notum2 OS=Danio rerio OX=7955 GN=notum2 PE=2 SV=1
contig_7dpi0368866	1.9079	NUD17_DANRE Nucleoside diphosphate-linked moiety X motif 17 OS=Danio rerio OX=7955 GN=nudt17 PE=2 SV=1
contig_7dpi0015566	2.8328e-62	PEN2_DANRE Gamma-secretase subunit PEN-2 OS=Danio rerio OX=7955 GN=psenen PE=3 SV=1
contig_7dpi0093547	0.231458	PTPRU_DANRE Receptor-type tyrosine-protein phosphatase U OS=Danio rerio OX=7955 GN=ptpru PE=2 SV=1
contig_7dpi0009291	0.001102	VGFR2_DANRE Vascular endothelial growth factor receptor 2 OS=Danio rerio OX=7955 GN=kdr PE=1 SV=2
contig_7dpi0009473	0.251923	GLCTK_DANRE Glycerate kinase OS=Danio rerio OX=7955 GN=glyctk PE=2 SV=1
contig_7dpi0003475	1.971	RBM46_DANRE Probable RNA-binding protein 46 OS=Danio rerio OX=7955 GN=rbm46 PE=2 SV=1
contig_7dpi0014439	0.104789	NACA_ORENI Nascent polypeptide-associated complex subunit alpha OS=Oreochromis niloticus OX=8128 GN=naca PE=2 SV=1
contig_7dpi0002303	1.63269	F155B_DANRE Transmembrane protein FAM155B OS=Danio rerio OX=7955 GN=fam155b PE=2 SV=1
contig_7dpi0003852	2.49231e-27	CATD_CHIHA Cathepsin D OS=Chionodraco hamatus OX=36188 GN=ctsd PE=1 SV=2
contig_7dpi0029204	0.993404	CCNF_DANRE Cyclin-F OS=Danio rerio OX=7955 GN=ccnf PE=2 SV=1
contig_7dpi0005656	2.80571e-98	CALM_ONCSP Calmodulin OS=Oncorhynchus sp. OX=8025 GN=calm PE=1 SV=2
contig_7dpi0007133	2.07559e-14	PSB1B_CARAU Proteasome subunit beta type-1-B OS=Carassius auratus OX=7957 GN=psmb1-B PE=2 SV=1
contig_7dpi0003032	0.92629	UCP2_CYPCA Mitochondrial uncoupling protein 2 OS=Cyprinus carpio OX=7962 GN=ucp2 PE=2 SV=1
contig_7dpi0006965	0.0611962	CRA1A_DANRE Collagen alpha-1(XXVII) chain A OS=Danio rerio OX=7955 GN=col27a1a PE=2 SV=1
contig_7dpi0574789	0.122242	GARE1_DANRE GRB2-associated and regulator of MAPK protein 1 OS=Danio rerio OX=7955 GN=garem1 PE=2 SV=1
contig_7dpi0509405		not available
contig_7dpi0024997	4.13504	IPRI_DANRE Inositol 1,4,5-trisphosphate receptor-interacting protein OS=Danio rerio OX=7955 GN=itprip PE=2 SV=1
contig_7dpi0170902		not available
contig_7dpi0010345	0.805122	FIL1L_DANRE Filamin A-interacting protein 1-like OS=Danio rerio OX=7955 GN=filip1l PE=2 SV=1
contig_7dpi0001163	0.3507	RUXE_DANRE Small nuclear ribonucleoprotein E OS=Danio rerio OX=7955 GN=snrpe PE=3 SV=1
contig_7dpi0013690	2.48456e-33	OSTF1_MONAL Osteoclast-stimulating factor 1 OS=Monopterus albus OX=43700 GN=ostf1 PE=2 SV=1
contig_7dpi0468439	0.151667	HIF1A_ONCMY Hypoxia-inducible factor 1-alpha OS=Oncorhynchus mykiss OX=8022 GN=hif1a PE=2 SV=1
contig_7dpi0016608	2.28687	SHA9A_DANRE Protein shisa-9A OS=Danio rerio OX=7955 GN=shisa9a PE=2 SV=1
contig_7dpi0007951	1.06719	CYTSA_TETNG Cytospin-A OS=Tetraodon nigroviridis OX=99883 GN=specc1l PE=2 SV=1
contig_7dpi0019484		not available
contig_7dpi0001497	1.07034e-76	AT1A1_CATCO Sodium/potassium-transporting ATPase subunit alpha-1 OS=Catostomus commersonii OX=7971 GN=atp1a1 PE=2 SV=1
contig_7dpi0007175	1.53614	PARI_DANRE PCNA-interacting partner OS=Danio rerio OX=7955 GN=parpbp PE=2 SV=1
contig_7dpi0009238	5.46246	MED12_DANRE Mediator of RNA polymerase II transcription subunit 12 OS=Danio rerio OX=7955 GN=med12 PE=2 SV=1
contig_7dpi0011459	0.193374	PLK4_DANRE Serine/threonine-protein kinase PLK4 OS=Danio rerio OX=7955 GN=plk4 PE=2 SV=2
contig_7dpi0055523	2.0598	SEM4E_DANRE Semaphorin-4E OS=Danio rerio OX=7955 GN=sema4e PE=2 SV=1
contig_7dpi0007087	1.54879	FEL_CYPCA Fish-egg lectin OS=Cyprinus carpio OX=7962 PE=1 SV=1
contig_7dpi0013558	2.99048	SDCG8_DANRE Serologically defined colon cancer antigen 8 homolog OS=Danio rerio OX=7955 GN=Sdccag8 PE=3 SV=2
contig_7dpi0001159	4.63635e-55	H2A_ONCMY Histone H2A OS=Oncorhynchus mykiss OX=8022 PE=1 SV=2
contig_7dpi0006570		not available
contig_7dpi0052950	0.685709	RS3_ICTPU 40S ribosomal protein S3 OS=Ictalurus punctatus OX=7998 GN=rps3 PE=2 SV=1
contig_7dpi0006707	6.87611e-50	CCNL1_DANRE Cyclin-L1 OS=Danio rerio OX=7955 GN=ccnl1 PE=1 SV=1
contig_7dpi0016862	0.603355	AMER1_DANRE APC membrane recruitment protein 1 OS=Danio rerio OX=7955 GN=amer1 PE=2 SV=1
contig_7dpi0006884	3.73841	RB3GP_DANRE Rab3 GTPase-activating protein catalytic subunit OS=Danio rerio OX=7955 GN=rab3gap1 PE=2 SV=2
contig_7dpi0000181	0.694331	TAF2_DANRE Transcription initiation factor TFIID subunit 2 OS=Danio rerio OX=7955 GN=taf2 PE=2 SV=2
contig_7dpi0002119	2.49062e-36	RS27A_ICTPU Ubiquitin-40S ribosomal protein S27a OS=Ictalurus punctatus OX=7998 GN=rps27a PE=2 SV=2
contig_7dpi0032104	0.418476	MCA3B_DANRE Protein-methionine sulfoxide oxidase mical3b OS=Danio rerio OX=7955 GN=mical3b PE=3 SV=2
contig_7dpi0127076		not available
contig_7dpi0008784	0.943137	K1109_DANRE Transmembrane protein KIAA1109 homolog OS=Danio rerio OX=7955 GN=si:ch211-233a24.2 PE=3 SV=1
contig_7dpi0034671	1.15589	S38A7_DANRE Putative sodium-coupled neutral amino acid transporter 7 OS=Danio rerio OX=7955 GN=slc38a7 PE=2 SV=1
contig_7dpi0012069	1.39699	HDA10_DANRE Polyamine deacetylase HDAC10 OS=Danio rerio OX=7955 GN=hdac10 PE=1 SV=2
contig_7dpi0005684	0.143594	OAZ2_DANRE Ornithine decarboxylase antizyme 2 OS=Danio rerio OX=7955 GN=oaz1b PE=2 SV=1
contig_7dpi0009282	2.21329e-32	LLPH_DANRE Protein LLP homolog OS=Danio rerio OX=7955 GN=llph PE=2 SV=1
contig_7dpi0015759	4.33308e-32	SRS1B_DANRE Serine/arginine-rich splicing factor 1B OS=Danio rerio OX=7955 GN=srsf1b PE=2 SV=1
contig_7dpi0350789	0.64633	MYCB2_DANRE E3 ubiquitin-protein ligase MYCBP2 OS=Danio rerio OX=7955 GN=mycbp2 PE=2 SV=1
contig_7dpi0020591	3.29186	T10B_DANRE Mitochondrial import inner membrane translocase subunit Tim10 B OS=Danio rerio OX=7955 GN=timm10b PE=2 SV=1
contig_7dpi0007473	0.000291587	FMNL3_DANRE Formin-like protein 3 OS=Danio rerio OX=7955 GN=fmnl3 PE=2 SV=2
contig_7dpi0027718	1.52813	DACT1_DANRE Dapper homolog 1 OS=Danio rerio OX=7955 GN=dact1 PE=1 SV=1
contig_7dpi0005945	3.33782	NBL1_DANRE Neuroblastoma suppressor of tumorigenicity 1 OS=Danio rerio OX=7955 GN=nbl1 PE=2 SV=1
contig_7dpi0004637	1.67027	CP1A1_LIZSA Cytochrome P450 1A1 OS=Liza saliens OX=48192 GN=cyp1a1 PE=2 SV=1
contig_7dpi0005487	1.99328	FAN1_DANRE Fanconi-associated nuclease 1 OS=Danio rerio OX=7955 GN=fan1 PE=2 SV=2
contig_7dpi0012767	5.02407	T198B_DANRE Transmembrane protein 198-B OS=Danio rerio OX=7955 GN=tmem198b PE=2 SV=1
contig_7dpi0015465	2.9945e-72	MCM10_DANRE Protein MCM10 homolog OS=Danio rerio OX=7955 GN=mcm10 PE=3 SV=1
contig_7dpi0000281	0.150854	MID51_DANRE Mitochondrial dynamics protein MID51 OS=Danio rerio OX=7955 GN=mief1 PE=2 SV=1
contig_7dpi0001256	0.682888	MK14B_CYPCA Mitogen-activated protein kinase 14B OS=Cyprinus carpio OX=7962 GN=mapk14b PE=1 SV=1
contig_7dpi0010421	0.0901686	KITA_DANRE Mast/stem cell growth factor receptor kita OS=Danio rerio OX=7955 GN=kita PE=2 SV=2
contig_7dpi0003669	4.78228e-13	GPX8_DANRE Probable glutathione peroxidase 8 OS=Danio rerio OX=7955 GN=gpx8 PE=2 SV=1
contig_7dpi0025303	2.26401	NAV3_DANRE Neuron navigator 3 OS=Danio rerio OX=7955 GN=nav3 PE=3 SV=1
contig_7dpi0020544	2.59308	PDXD1_DANRE Pyridoxal-dependent decarboxylase domain-containing protein 1 OS=Danio rerio OX=7955 GN=pdxdc1 PE=2 SV=1
contig_7dpi0000182	4.33246	PK1L1_ORYLA Polycystic kidney disease 1 like 1 OS=Oryzias latipes OX=8090 GN=pkd1l1 PE=1 SV=2
contig_7dpi0011405	0.198126	EMC4_DANRE ER membrane protein complex subunit 4 OS=Danio rerio OX=7955 GN=emc4 PE=2 SV=1
contig_7dpi0000228	4.4647	FEN1B_DANRE Probable flap endonuclease 1 homolog OS=Danio rerio OX=7955 GN=si:dkeyp-13a3.3 PE=2 SV=1
contig_7dpi0056733	0.269561	ANM7_DANRE Protein arginine N-methyltransferase 7 OS=Danio rerio OX=7955 GN=prmt7 PE=2 SV=1
contig_7dpi0008944	1.88345e-06	PK1L1_ORYLA Polycystic kidney disease 1 like 1 OS=Oryzias latipes OX=8090 GN=pkd1l1 PE=1 SV=2
contig_7dpi0273598	0.0599468	MED28_DANRE Mediator of RNA polymerase II transcription subunit 28 OS=Danio rerio OX=7955 GN=med28 PE=2 SV=1
contig_7dpi0027085	4.00704	DDX51_DANRE ATP-dependent RNA helicase DDX51 OS=Danio rerio OX=7955 GN=ddx51 PE=2 SV=1
contig_7dpi0008930	0.544663	PAXI1_DANRE PAX-interacting protein 1 OS=Danio rerio OX=7955 GN=paxip1 PE=2 SV=1
contig_7dpi0005824	6.45777	CCNB2_ORYLU G2/mitotic-specific cyclin-B2 OS=Oryzias luzonensis OX=104659 GN=ccnb2 PE=2 SV=1
contig_7dpi0007222	0.833985	SEP15_DANRE Selenoprotein F OS=Danio rerio OX=7955 GN=selenof PE=2 SV=2
contig_7dpi0047234		not available
contig_7dpi0001398	8.49388	DPYD_DANRE Dihydropyrimidine dehydrogenase [NADP(+)] OS=Danio rerio OX=7955 GN=dpyd PE=2 SV=1
contig_7dpi0011561	1.94496	THAB_PAROL Thyroid hormone receptor alpha-B OS=Paralichthys olivaceus OX=8255 GN=thra2 PE=2 SV=1
contig_7dpi0018906	0.115701	LOL2B_DANRE Lysyl oxidase homolog 2B OS=Danio rerio OX=7955 GN=loxl2b PE=2 SV=1
contig_7dpi0005671		not available
contig_7dpi0000799	7.84142e-05	TWF2_DANRE Twinfilin-2 OS=Danio rerio OX=7955 GN=twf2 PE=2 SV=1
contig_7dpi0000174	0	ALBU1_SALSA Serum albumin 1 OS=Salmo salar OX=8030 GN=alb1 PE=2 SV=1
contig_7dpi0007491	8.46529e-159	APOA1_SALTR Apolipoprotein A-I OS=Salmo trutta OX=8032 GN=apoa1 PE=2 SV=1
contig_7dpi0013851	1.30726e-39	COX6A_ONCMY Cytochrome c oxidase subunit 6A, mitochondrial OS=Oncorhynchus mykiss OX=8022 PE=3 SV=1
contig_7dpi0003424	0.248818	GMPAB_DANRE Mannose-1-phosphate guanyltransferase alpha-B OS=Danio rerio OX=7955 GN=gmppab PE=2 SV=1
contig_7dpi0012568	1.2424e-10	CX5B2_ONCMY Cytochrome c oxidase subunit 5B liver, mitochondrial (Fragment) OS=Oncorhynchus mykiss OX=8022 PE=1 SV=1
contig_7dpi0185653	6.17379e-25	RS27A_ICTPU Ubiquitin-40S ribosomal protein S27a OS=Ictalurus punctatus OX=7998 GN=rps27a PE=2 SV=2
contig_7dpi0021527	0.262127	NHP2_DANRE H/ACA ribonucleoprotein complex subunit 2-like protein OS=Danio rerio OX=7955 GN=nhp2 PE=2 SV=1
contig_7dpi0051858		not available
contig_7dpi0020665	1.45141	DNMBP_DANRE Dynamin-binding protein OS=Danio rerio OX=7955 GN=dnmbp PE=2 SV=1
contig_7dpi0019178	1.56838	ASSY_DANRE Argininosuccinate synthase OS=Danio rerio OX=7955 GN=ass1 PE=2 SV=1
contig_7dpi0006071	1.23008e-166	PSA7_CARAU Proteasome subunit alpha type-7 OS=Carassius auratus OX=7957 GN=psma7 PE=2 SV=1
contig_7dpi0001846	3.83733	CC14A_DANRE Dual specificity protein phosphatase CDC14AB OS=Danio rerio OX=7955 GN=cdc14ab PE=3 SV=1
contig_7dpi0081968	1.41184	T41AA_DANRE Transmembrane protein 41A-A OS=Danio rerio OX=7955 GN=tmem41aa PE=2 SV=1
contig_7dpi0049547	0.0837376	T237B_DANRE Transmembrane protein 237B OS=Danio rerio OX=7955 GN=tmem237b PE=2 SV=1
contig_7dpi0082908	0.186912	CYB_NANAN Cytochrome b OS=Nannacara anomala OX=168802 GN=mt-cyb PE=3 SV=1
contig_7dpi0017056	8.18538	MBB1A_DANRE Myb-binding protein 1A-like protein OS=Danio rerio OX=7955 GN=mybbp1a PE=1 SV=1
contig_7dpi0111048	9.00201	NSRP1_DANRE Nuclear speckle splicing regulatory protein 1 OS=Danio rerio OX=7955 GN=nsrp1 PE=1 SV=2
contig_7dpi0017110	0.856569	ENDOU_PAROL Poly(U)-specific endoribonuclease OS=Paralichthys olivaceus OX=8255 GN=endou PE=2 SV=1
contig_7dpi0064384	0.0481812	SMY2A_DANRE N-lysine methyltransferase SMYD2-A OS=Danio rerio OX=7955 GN=smyd2a PE=2 SV=1
contig_7dpi0011825		not available
contig_7dpi0102843	0.714234	PGAM5_DANRE Serine/threonine-protein phosphatase PGAM5, mitochondrial OS=Danio rerio OX=7955 GN=pgam5 PE=2 SV=2
contig_7dpi0015969	6.06826e-83	PP4CB_DANRE Serine/threonine-protein phosphatase 4 catalytic subunit B OS=Danio rerio OX=7955 GN=ppp4cb PE=2 SV=1
contig_7dpi0050542	0.31107	TBX5A_DANRE T-box transcription factor TBX5-A OS=Danio rerio OX=7955 GN=tbx5a PE=2 SV=2
contig_7dpi0003701		not available
contig_7dpi0051613	1.74936	STB1B_DANRE Histone-lysine N-methyltransferase SETDB1-B OS=Danio rerio OX=7955 GN=setdb1b PE=2 SV=2
contig_7dpi0356389		not available
contig_7dpi0026714	3.65666	CSN4_DANRE COP9 signalosome complex subunit 4 OS=Danio rerio OX=7955 GN=cops4 PE=2 SV=1
contig_7dpi0039835	0.716029	HXCDA_TAKRU Homeobox protein Hox-C13a OS=Takifugu rubripes OX=31033 GN=hoxc13a PE=3 SV=1
contig_7dpi0021389	3.10366	TM2D3_DANRE TM2 domain-containing protein 3 OS=Danio rerio OX=7955 GN=tm2d3 PE=2 SV=2
contig_7dpi0059909	2.14328e-25	FABPH_ONCMY Fatty acid-binding protein, heart OS=Oncorhynchus mykiss OX=8022 GN=fabp3 PE=2 SV=3
contig_7dpi0002954		not available
contig_7dpi0003292	2.22476	NKD2L_DANRE Protein naked cuticle homolog 2-like OS=Danio rerio OX=7955 GN=nkd2l PE=2 SV=1
contig_7dpi0008682	0.0767113	MYPT1_DANRE Protein phosphatase 1 regulatory subunit 12A OS=Danio rerio OX=7955 GN=ppp1r12a PE=2 SV=2
contig_7dpi0034836	8.32295	MFRN2_DANRE Mitoferrin-2 OS=Danio rerio OX=7955 GN=slc25a28 PE=2 SV=1
contig_7dpi0033897	3.31108	TYRO_ORYLA Tyrosinase OS=Oryzias latipes OX=8090 GN=tyr PE=2 SV=1
contig_7dpi0013973	3.45604e-05	IF2B1_DANRE Insulin-like growth factor 2 mRNA-binding protein 1 OS=Danio rerio OX=7955 GN=igf2bp1 PE=1 SV=1
contig_7dpi0008225	0.353774	L1CA1_DANRE Neural cell adhesion molecule L1.1 (Fragment) OS=Danio rerio OX=7955 GN=nadl1.1 PE=2 SV=1
contig_7dpi0018655	8.73396	CISY_TETNG Citrate synthase, mitochondrial OS=Tetraodon nigroviridis OX=99883 GN=cs PE=3 SV=1
contig_7dpi0100182	1.30828e-06	TYB12_ONCMY Thymosin beta-12 OS=Oncorhynchus mykiss OX=8022 PE=1 SV=2
contig_7dpi0025463	1.85889	MICU1_DANRE Calcium uptake protein 1, mitochondrial OS=Danio rerio OX=7955 GN=micu1 PE=2 SV=1
contig_7dpi0013957	0.884815	GDF6A_DANRE Growth/differentiation factor 6-A OS=Danio rerio OX=7955 GN=gdf6a PE=1 SV=1
contig_7dpi0042160	0.788671	SC4AA_DANRE Sodium channel protein type 4 subunit alpha A OS=Danio rerio OX=7955 GN=scn4aa PE=2 SV=2
contig_7dpi0043320	0.214823	SC5A8_DANRE Sodium-coupled monocarboxylate transporter 1 OS=Danio rerio OX=7955 GN=slc5a8 PE=1 SV=1
contig_7dpi0024196	0.652613	STIL_DANRE SCL-interrupting locus protein homolog OS=Danio rerio OX=7955 GN=stil PE=1 SV=2
contig_7dpi0021755	2.96777e-89	UCP2_CYPCA Mitochondrial uncoupling protein 2 OS=Cyprinus carpio OX=7962 GN=ucp2 PE=2 SV=1
contig_7dpi0015525	1.28575e-23	CSN9_DANRE COP9 signalosome complex subunit 9 OS=Danio rerio OX=7955 GN=cops9 PE=3 SV=2
contig_7dpi0015647	0.208576	RGL1_DANRE Ral guanine nucleotide dissociation stimulator-like 1 OS=Danio rerio OX=7955 GN=rgl1 PE=2 SV=1
contig_7dpi0092823	5.12282	ADA2B_DANRE Alpha-2B adrenergic receptor OS=Danio rerio OX=7955 GN=adra2b PE=3 SV=1
contig_7dpi0000088	2.7418	PCX1_TAKRU Pecanex-like protein 1 OS=Takifugu rubripes OX=31033 GN=pcnx1 PE=3 SV=1
contig_7dpi0032137	3.45768e-05	COX8B_ONCMY Cytochrome c oxidase subunit 8B, mitochondrial (Fragment) OS=Oncorhynchus mykiss OX=8022 PE=1 SV=1
contig_7dpi0029920	1.61081e-109	ENOA_THUAL Alpha-enolase OS=Thunnus albacares OX=8236 GN=ENO1 PE=1 SV=1
contig_7dpi0020466	4.78527e-09	AGRL4_DANRE Adhesion G protein-coupled receptor L4 OS=Danio rerio OX=7955 GN=adgrl4 PE=2 SV=2
contig_7dpi0002669	6.46254	VSI10_DANRE V-set and immunoglobulin domain-containing protein 10 OS=Danio rerio OX=7955 GN=vsig10 PE=2 SV=1
contig_7dpi0017493	3.72828	EF1G_CARAU Elongation factor 1-gamma OS=Carassius auratus OX=7957 GN=eef1g PE=2 SV=1
contig_7dpi0217788	0.474896	TM127_DANRE Transmembrane protein 127 OS=Danio rerio OX=7955 GN=tmem127 PE=2 SV=1
contig_7dpi0370583	2.10729e-05	HBA1_ONCMY Hemoglobin subunit alpha-1 OS=Oncorhynchus mykiss OX=8022 GN=hba1 PE=1 SV=1
contig_7dpi0007194	2.33158	CASC1_DANRE Protein CASC1 OS=Danio rerio OX=7955 GN=casc1 PE=2 SV=2
contig_7dpi0032227	3.66133	ZNT7_DANRE Zinc transporter 7 OS=Danio rerio OX=7955 GN=slc30a7 PE=2 SV=1
contig_7dpi0001553	2.13553e-29	RHOAB_DANRE Rho-related GTP-binding protein RhoA-B OS=Danio rerio OX=7955 GN=rhoab PE=1 SV=1
contig_7dpi0048909	0.0671183	SMAL1_DANRE SWI/SNF-related matrix-associated actin-dependent regulator of chromatin subfamily A-like protein 1 OS=Danio rerio OX=7955 GN=smarcal1 PE=2 SV=1
contig_7dpi0088439	4.30499	C5AR1_ONCMY C5a anaphylatoxin chemotactic receptor 1 OS=Oncorhynchus mykiss OX=8022 GN=c5ar1 PE=2 SV=1
contig_7dpi0002805	2.56385e-57	TBA_ONCKE Tubulin alpha chain OS=Oncorhynchus keta OX=8018 PE=2 SV=2
contig_7dpi0017734	0.876495	SOML_PAROL Somatolactin OS=Paralichthys olivaceus OX=8255 PE=1 SV=1
contig_7dpi0005541	0.907016	COQ8B_DANRE Atypical kinase COQ8B, mitochondrial OS=Danio rerio OX=7955 GN=coq8b PE=3 SV=2
contig_7dpi0012290	2.7291	PPB_GADMO Alkaline phosphatase OS=Gadus morhua OX=8049 PE=1 SV=1
contig_7dpi0040906	0.997598	FAD1_DANRE FAD synthase OS=Danio rerio OX=7955 GN=flad1 PE=2 SV=1
contig_7dpi0006488	0.201819	CR19B_DANRE Uncharacterized protein C18orf19 homolog B OS=Danio rerio OX=7955 GN=zgc:113036 PE=2 SV=1
contig_7dpi0005344	0.940595	K1522_DANRE Uncharacterized protein KIAA1522 homolog OS=Danio rerio OX=7955 GN=si:ch211-194e15.5 PE=4 SV=1
contig_7dpi0001653	2.20379e-26	SELK_DANRE Selenoprotein K OS=Danio rerio OX=7955 GN=selenok PE=3 SV=3
contig_7dpi0332165	3.18615e-13	RS6_ONCMY 40S ribosomal protein S6 OS=Oncorhynchus mykiss OX=8022 GN=rps6 PE=2 SV=1
contig_7dpi0003161	9.13289e-09	SND1_DANRE Staphylococcal nuclease domain-containing protein 1 OS=Danio rerio OX=7955 GN=snd1 PE=2 SV=1
contig_7dpi0000554	2.16165e-102	TP8L2_SALSA Tumor necrosis factor alpha-induced protein 8-like protein 2 OS=Salmo salar OX=8030 GN=tnfaip8l2 PE=2 SV=1
contig_7dpi0009467	1.04867	DAAF3_DANRE Dynein assembly factor 3, axonemal OS=Danio rerio OX=7955 GN=dnaaf3 PE=2 SV=2
contig_7dpi0012753	1.94914	NRP1A_DANRE Neuropilin-1a OS=Danio rerio OX=7955 GN=nrp1a PE=2 SV=1
contig_7dpi0045917	1.39547	FXC1B_DANRE Forkhead box C1-B OS=Danio rerio OX=7955 GN=foxc1b PE=2 SV=1
contig_7dpi0014896	0.644512	SOMA_PAGMA Somatotropin OS=Pagrus major OX=143350 GN=gh PE=2 SV=1
contig_7dpi0012525	2.12151	SART3_DANRE Squamous cell carcinoma antigen recognized by T-cells 3 OS=Danio rerio OX=7955 GN=sart3 PE=2 SV=1
contig_7dpi0028797	1.30415	DS7CB_DANRE Dehydrogenase/reductase SDR family member 7C-B OS=Danio rerio OX=7955 GN=dhrs7cb PE=2 SV=1
contig_7dpi0025311	0.281494	PGFRB_TAKRU Platelet-derived growth factor receptor beta OS=Takifugu rubripes OX=31033 GN=pdgfrb PE=3 SV=1
contig_7dpi0009428	0.0182039	ITLN_ONCMY Intelectin OS=Oncorhynchus mykiss OX=8022 GN=itln PE=1 SV=1
contig_7dpi0010093	8.49455	TELO2_DANRE Telomere length regulation protein TEL2 homolog OS=Danio rerio OX=7955 GN=telo2 PE=2 SV=2
contig_7dpi0015842	6.83117e-16	GPX8_DANRE Probable glutathione peroxidase 8 OS=Danio rerio OX=7955 GN=gpx8 PE=2 SV=1
contig_7dpi0006445	1.33157e-05	ASC_DANRE Apoptosis-associated speck-like protein containing a CARD OS=Danio rerio OX=7955 GN=pycard PE=1 SV=1
contig_7dpi0043351	0.684425	5HT1D_TAKRU 5-hydroxytryptamine receptor 1D OS=Takifugu rubripes OX=31033 GN=htr1d PE=3 SV=1
contig_7dpi0011290	0.250868	KMT5B_DANRE Histone-lysine N-methyltransferase KMT5B OS=Danio rerio OX=7955 GN=kmt5b PE=2 SV=2
contig_7dpi0057046	2.09053	CP17A_ICTPU Steroid 17-alpha-hydroxylase/17,20 lyase OS=Ictalurus punctatus OX=7998 GN=cyp17a1 PE=2 SV=1
contig_7dpi0011046	0.209784	BICL2_DANRE BICD family-like cargo adapter 2 OS=Danio rerio OX=7955 GN=bicdl2 PE=2 SV=1
contig_7dpi0001637	5.14815	EFTS_DANRE Elongation factor Ts, mitochondrial OS=Danio rerio OX=7955 GN=tsfm PE=2 SV=1
contig_7dpi0008188	0.134998	MB212_DANRE Protein mab-21-like 2 OS=Danio rerio OX=7955 GN=mab21l2 PE=1 SV=1
contig_7dpi0016092	0.345456	HPPD_DANRE 4-hydroxyphenylpyruvate dioxygenase OS=Danio rerio OX=7955 GN=hpd PE=2 SV=1
contig_7dpi0024610	2.85868	RTSTL_DANRE Inactive all-trans-retinol 13,14-reductase OS=Danio rerio OX=7955 GN=retsatl PE=1 SV=1
contig_7dpi0010970	4.71893e-23	C3AR_DANRE C3a anaphylatoxin chemotactic receptor OS=Danio rerio OX=7955 GN=c3ar1 PE=3 SV=1
contig_7dpi0079263	0.0858282	FXRD2_DANRE FAD-dependent oxidoreductase domain-containing protein 2 OS=Danio rerio OX=7955 GN=foxred2 PE=2 SV=1
contig_7dpi0011387	0.00123195	RUXE_DANRE Small nuclear ribonucleoprotein E OS=Danio rerio OX=7955 GN=snrpe PE=3 SV=1
contig_7dpi0002110	8.65915e-24	MDH1B_DANRE Putative malate dehydrogenase 1B OS=Danio rerio OX=7955 GN=mdh1b PE=2 SV=1
contig_7dpi0045600	4.69402	HXD9A_DANRE Homeobox protein Hox-D9a OS=Danio rerio OX=7955 GN=hoxd9a PE=2 SV=2
contig_7dpi0017108	0.456642	SIR2_DANRE NAD-dependent protein deacetylase sirtuin-2 OS=Danio rerio OX=7955 GN=sirt2 PE=1 SV=1
contig_7dpi0044615	0.37399	MY9AA_DANRE Unconventional myosin-IXAa OS=Danio rerio OX=7955 GN=myo9aa PE=3 SV=1
contig_7dpi0092375		not available
contig_7dpi0061034	1.2133	RN145_DANRE RING finger protein 145 OS=Danio rerio OX=7955 GN=rnf145 PE=2 SV=1
contig_7dpi0006501	0.626229	C356_FUNHE Cytochrome P450 3A56 OS=Fundulus heteroclitus OX=8078 GN=cyp3a56 PE=2 SV=1
contig_7dpi0035258	0.0440326	ST2S2_DANRE Cytosolic sulfotransferase 2 OS=Danio rerio OX=7955 GN=sult1st2 PE=1 SV=1
contig_7dpi0010519	2.38661	GLHA_HYPMO Glycoprotein hormones alpha chain OS=Hypophthalmichthys molitrix OX=13095 GN=cga PE=1 SV=1
contig_7dpi0003538	0.497907	CNTN5_DANRE Contactin-5 OS=Danio rerio OX=7955 GN=cntn5 PE=2 SV=1
contig_7dpi0018443	4.26213	SETB2_DANRE Histone-lysine N-methyltransferase SETDB2 OS=Danio rerio OX=7955 GN=setdb2 PE=2 SV=2
contig_7dpi0014162	6.51896	L2GL2_DANRE LLGL scribble cell polarity complex component 2 OS=Danio rerio OX=7955 GN=llgl2 PE=1 SV=1
contig_7dpi0011115	4.97289	RBM24_DANRE RNA-binding protein 24 OS=Danio rerio OX=7955 GN=rbm24 PE=2 SV=1
contig_7dpi0011051	1.65483	POMT2_DANRE Protein O-mannosyl-transferase 2 OS=Danio rerio OX=7955 GN=pomt2 PE=1 SV=1
contig_7dpi0008816	0.527115	HPF1_DANRE Histone PARylation factor 1 OS=Danio rerio OX=7955 GN=hpf1 PE=2 SV=2
contig_7dpi0027203	3.95978	PO5F1_DANRE POU domain, class 5, transcription factor 1 OS=Danio rerio OX=7955 GN=pou5f1 PE=2 SV=1
contig_7dpi0206249	0.700897	S29A4_DANRE Equilibrative nucleoside transporter 4 OS=Danio rerio OX=7955 GN=slc29a4 PE=2 SV=1
contig_7dpi0005976	2.03428	COA7_DANRE Cytochrome c oxidase assembly factor 7 OS=Danio rerio OX=7955 GN=coa7 PE=2 SV=1
contig_7dpi0011727	7.26259e-47	HCE2_ORYLA High choriolytic enzyme 2 OS=Oryzias latipes OX=8090 GN=hceb PE=2 SV=1
contig_7dpi0010210	9.5408e-22	MMP21_DANRE Matrix metallopeptidase-21 OS=Danio rerio OX=7955 GN=mmp21 PE=2 SV=2
contig_7dpi0014168	3.06546e-153	CDK1_CARAU Cyclin-dependent kinase 1 OS=Carassius auratus OX=7957 GN=cdk1 PE=2 SV=1
contig_7dpi0001185	5.537	SMS2_ONCMY Somatostatin-2 OS=Oncorhynchus mykiss OX=8022 GN=sst2 PE=3 SV=1
contig_7dpi0000907	2.18545e-92	SEP15_ONCMY Selenoprotein F OS=Oncorhynchus mykiss OX=8022 GN=selenof PE=2 SV=2
contig_7dpi0129466	2.35747	HME1A_DANRE Homeobox protein engrailed-1a OS=Danio rerio OX=7955 GN=eng1a PE=2 SV=1
contig_7dpi0026512	7.67523	TPL2A_DANRE Tumor necrosis factor, alpha-induced protein 8-like protein 2 A OS=Danio rerio OX=7955 GN=tnfaip8l2a PE=2 SV=1
contig_7dpi0005141	1.54388	RFP4A_DANRE Rab11 family-interacting protein 4A OS=Danio rerio OX=7955 GN=rab11fip4a PE=2 SV=1
contig_7dpi0037420	0.842753	TLL1_DANRE Dorsal-ventral patterning tolloid-like protein 1 OS=Danio rerio OX=7955 GN=tll1 PE=2 SV=1
contig_7dpi0082470	2.49521	JMY_DANRE Junction-mediating and -regulatory protein OS=Danio rerio OX=7955 GN=jmy PE=2 SV=1
contig_7dpi0002240	2.01043e-24	PSB9_SALSA Proteasome subunit beta type-9 OS=Salmo salar OX=8030 GN=psmb9-a PE=2 SV=1
contig_7dpi0047515	2.86692	TT39C_DANRE Tetratricopeptide repeat protein 39C OS=Danio rerio OX=7955 GN=ttc39c PE=2 SV=1
contig_7dpi0012550	2.10017	GRB1L_DANRE GREB1-like protein OS=Danio rerio OX=7955 GN=greb1l PE=2 SV=2
contig_7dpi0016905	0.0387328	RAG1_ONCMY V(D)J recombination-activating protein 1 OS=Oncorhynchus mykiss OX=8022 GN=rag1 PE=3 SV=1
contig_7dpi0016231	0.433546	XKR4_TETNG XK-related protein 4 OS=Tetraodon nigroviridis OX=99883 GN=xkr4 PE=2 SV=1
contig_7dpi0030791	1.17106	AGRV1_DANRE Adhesion G-protein coupled receptor V1 OS=Danio rerio OX=7955 GN=adgrv1 PE=2 SV=1
contig_7dpi0003440	0.575688	ZN143_DANRE Zinc finger protein 143 OS=Danio rerio OX=7955 GN=znf143 PE=2 SV=2
contig_7dpi0054918	6.33917	PABPA_DANRE Polyadenylate-binding protein 1A OS=Danio rerio OX=7955 GN=pabpc1a PE=1 SV=1
contig_7dpi0012951	1.67712	ARX_DANRE Aristaless-related homeobox protein OS=Danio rerio OX=7955 GN=arx PE=2 SV=1
contig_7dpi0000313	0.0074818	G6PD_TAKRU Glucose-6-phosphate 1-dehydrogenase OS=Takifugu rubripes OX=31033 GN=g6pd PE=3 SV=1
contig_7dpi0022328	0.599781	K1C13_ONCMY Keratin, type I cytoskeletal 13 OS=Oncorhynchus mykiss OX=8022 GN=krt13 PE=2 SV=1
contig_7dpi0002837	1.7186	FXRD2_DANRE FAD-dependent oxidoreductase domain-containing protein 2 OS=Danio rerio OX=7955 GN=foxred2 PE=2 SV=1
contig_7dpi0004146	2.29296	FEM1A_DANRE Protein fem-1 homolog A OS=Danio rerio OX=7955 GN=fem1a PE=2 SV=1
contig_7dpi0028774		not available
contig_7dpi0005572	7.13163e-19	SC61G_GADMO Protein transport protein Sec61 subunit gamma OS=Gadus morhua OX=8049 GN=sec61g PE=3 SV=1
contig_7dpi0019019	1.00956	ZN148_DANRE Zinc finger protein 148 OS=Danio rerio OX=7955 GN=znf148 PE=2 SV=2
contig_7dpi0027842	0.530259	CAPAM_DANRE mRNA (2'-O-methyladenosine-N(6)-)-methyltransferase OS=Danio rerio OX=7955 GN=pcif1 PE=1 SV=1
contig_7dpi0008675	1.96088	MED29_DANRE Mediator of RNA polymerase II transcription subunit 29 OS=Danio rerio OX=7955 GN=med29 PE=2 SV=1
contig_7dpi0035995	0.561134	ERO1A_DANRE ERO1-like protein alpha OS=Danio rerio OX=7955 GN=ero1a PE=2 SV=1
contig_7dpi0014349	3.63666	KBTBC_DANRE Kelch repeat and BTB domain-containing protein 12 OS=Danio rerio OX=7955 GN=kbtbd12 PE=2 SV=1
contig_7dpi0037676	4.4226	MFD4B_DANRE Major facilitator superfamily domain-containing protein 4B OS=Danio rerio OX=7955 GN=mfsd4b PE=2 SV=1
contig_7dpi0048778	4.39917e-06	PSB9_ONCMY Proteasome subunit beta type-9 OS=Oncorhynchus mykiss OX=8022 GN=psmb9 PE=2 SV=1
contig_7dpi0017807	1.99593	TIE2_DANRE Tyrosine-protein kinase receptor Tie-2 OS=Danio rerio OX=7955 GN=tie2 PE=2 SV=1
contig_7dpi0055522	0.215067	TT39A_DANRE Tetratricopeptide repeat protein 39A OS=Danio rerio OX=7955 GN=ttc39a PE=2 SV=1
contig_7dpi0011329	0.928553	CSF11_TAKRU Macrophage colony-stimulating factor 1 receptor 1 OS=Takifugu rubripes OX=31033 GN=csf1r1 PE=3 SV=1
contig_7dpi0010582	1.61733e-59	ARF3_TAKRU ADP-ribosylation factor 3 OS=Takifugu rubripes OX=31033 GN=arf3 PE=3 SV=2
contig_7dpi0002235	0.780803	NATT2_THANI Natterin-2 OS=Thalassophryne nattereri OX=289382 PE=1 SV=1
contig_7dpi0043666	2.74792	RT35_DANRE 28S ribosomal protein S35, mitochondrial OS=Danio rerio OX=7955 GN=mrps35 PE=2 SV=1
contig_7dpi0050791	4.38346e-11	ISP2_OSMMO Type-2 ice-structuring protein OS=Osmerus mordax OX=8014 PE=1 SV=1
contig_7dpi0006585	0	TRFE1_SALSA Serotransferrin-1 OS=Salmo salar OX=8030 GN=tf1 PE=1 SV=1
contig_7dpi0376025	0.126463	TBAT_ONCMY Tubulin alpha chain, testis-specific OS=Oncorhynchus mykiss OX=8022 PE=2 SV=1
contig_7dpi0021124	0.633237	Z687A_DANRE Zinc finger protein 687a OS=Danio rerio OX=7955 GN=znf687a PE=2 SV=1
contig_7dpi0010982	2.68606	PI42C_DANRE Phosphatidylinositol 5-phosphate 4-kinase type-2 gamma OS=Danio rerio OX=7955 GN=pip4k2c PE=2 SV=1
contig_7dpi0001936	0	TBAT_ONCMY Tubulin alpha chain, testis-specific OS=Oncorhynchus mykiss OX=8022 PE=2 SV=1
contig_7dpi0055588	0.587283	PCX4_DANRE Pecanex-like protein 4 OS=Danio rerio OX=7955 GN=pcnx4 PE=2 SV=1
contig_7dpi0015780	1.56876e-59	CATA_DANRE Catalase OS=Danio rerio OX=7955 GN=cat PE=2 SV=1
contig_7dpi0026489	3.07338	NMD3_DANRE 60S ribosomal export protein NMD3 OS=Danio rerio OX=7955 GN=nmd3 PE=2 SV=1
contig_7dpi0318981	0.625892	RFIP3_DANRE Rab11 family-interacting protein 3 OS=Danio rerio OX=7955 GN=rab11fip3 PE=3 SV=1
contig_7dpi0014289	9.71037	SCNA_ELEEL Sodium channel protein OS=Electrophorus electricus OX=8005 PE=1 SV=1
contig_7dpi0042889	1.16448	R213B_DANRE E3 ubiquitin-protein ligase rnf213-beta OS=Danio rerio OX=7955 GN=rnf213b PE=3 SV=1
contig_7dpi0005118	1.44116	ORA1_DANRE Olfactory receptor class A-like protein 1 OS=Danio rerio OX=7955 GN=ora1 PE=2 SV=1
contig_7dpi0005367		not available
contig_7dpi0013990	0.354342	ANGE2_DANRE Protein angel homolog 2 OS=Danio rerio OX=7955 GN=angel2 PE=2 SV=1
contig_7dpi0027898	0.180776	CP11A_ONCMY Cholesterol side-chain cleavage enzyme, mitochondrial OS=Oncorhynchus mykiss OX=8022 GN=cyp11a1 PE=2 SV=1
contig_7dpi0000147	6.26153e-95	CALM_ONCSP Calmodulin OS=Oncorhynchus sp. OX=8025 GN=calm PE=1 SV=2
contig_7dpi0018172	3.52089	CO041_DANRE Protein C15orf41 homolog OS=Danio rerio OX=7955 GN=zgc:154061 PE=2 SV=1
contig_7dpi0002949	4.8467e-34	CWC15_DANRE Protein CWC15 homolog OS=Danio rerio OX=7955 GN=cwc15 PE=2 SV=1
contig_7dpi0034842	3.10292	TSN31_DANRE Tetraspanin-31 OS=Danio rerio OX=7955 GN=tspan31 PE=2 SV=2
contig_7dpi0013539	8.33949	MTMR2_DANRE Myotubularin-related protein 2 OS=Danio rerio OX=7955 GN=mtmr2 PE=2 SV=2
contig_7dpi0003862	4.19014	WN10A_DANRE Protein Wnt-10a OS=Danio rerio OX=7955 GN=wnt10a PE=1 SV=1
contig_7dpi0011083	8.03215e-18	OSTF1_MONAL Osteoclast-stimulating factor 1 OS=Monopterus albus OX=43700 GN=ostf1 PE=2 SV=1
contig_7dpi0040775	0.190887	CDHR1_DANRE Cadherin-related family member 1 OS=Danio rerio OX=7955 GN=cdhr1 PE=2 SV=1
contig_7dpi0017994	3.24222	PKHH1_DANRE Pleckstrin homology domain-containing family H member 1 OS=Danio rerio OX=7955 GN=plekhh1 PE=2 SV=1
contig_7dpi0044117	2.83468	KAD1_CYPCA Adenylate kinase isoenzyme 1 OS=Cyprinus carpio OX=7962 GN=ak1 PE=1 SV=2
contig_7dpi0001886	5.54908e-85	HMGT_ONCMY High mobility group-T protein OS=Oncorhynchus mykiss OX=8022 PE=2 SV=2
contig_7dpi0032192	0.101077	ESR22_CARAU Estrogen receptor beta-2 OS=Carassius auratus OX=7957 GN=esr2b PE=2 SV=1
contig_7dpi0007288	0.478352	R213B_DANRE E3 ubiquitin-protein ligase rnf213-beta OS=Danio rerio OX=7955 GN=rnf213b PE=3 SV=1
contig_7dpi0015066	3.22512	R213A_DANRE E3 ubiquitin-protein ligase rnf213-alpha OS=Danio rerio OX=7955 GN=rnf213a PE=3 SV=1
contig_7dpi0014094	0.080324	LCE_ORYLA Low choriolytic enzyme OS=Oryzias latipes OX=8090 GN=lce PE=1 SV=1
contig_7dpi0012040	1.51086e-11	RBM24_DANRE RNA-binding protein 24 OS=Danio rerio OX=7955 GN=rbm24 PE=2 SV=1
contig_7dpi0007792	7.09396	TRM2B_DANRE tRNA (uracil(54)-C(5))-methyltransferase homolog-B OS=Danio rerio OX=7955 GN=trmt2b PE=2 SV=2
contig_7dpi0039816	1.05948	HDA9B_DANRE Histone deacetylase 9-B OS=Danio rerio OX=7955 GN=hdac9b PE=2 SV=1
contig_7dpi0006051	0.775838	PKHA7_DANRE Pleckstrin homology domain-containing family A member 7 OS=Danio rerio OX=7955 GN=plekha7 PE=2 SV=2
contig_7dpi0022273	0.157939	TIKI1_DANRE Metalloprotease TIKI1 OS=Danio rerio OX=7955 GN=trabd2a PE=2 SV=2
contig_7dpi0018569	0.865851	CF206_DANRE Cilia- and flagella-associated protein 206 OS=Danio rerio OX=7955 GN=cfap206 PE=2 SV=1
contig_7dpi0024809	8.65136	VGFR4_DANRE Vascular endothelial growth factor receptor kdr-like OS=Danio rerio OX=7955 GN=kdrl PE=1 SV=1
contig_7dpi0004569	7.05496	ARR3_ONCMY Arrestin red cell isoform 3 OS=Oncorhynchus mykiss OX=8022 PE=2 SV=1
contig_7dpi0002067	1.65066	CYC_DANRE Cytochrome c OS=Danio rerio OX=7955 GN=cyc PE=3 SV=3
contig_7dpi0007060	0.1458	SOX3_DANRE Transcription factor Sox-3 OS=Danio rerio OX=7955 GN=sox3 PE=1 SV=1
contig_7dpi0037434	0.115062	PTC1_DANRE Protein patched homolog 1 OS=Danio rerio OX=7955 GN=ptch1 PE=2 SV=1
contig_7dpi0082501	0.745003	TEN3_DANRE Teneurin-3 OS=Danio rerio OX=7955 GN=tenm3 PE=2 SV=2
contig_7dpi0006484	0.284403	DUSTY_PIMPR Dual serine/threonine and tyrosine protein kinase OS=Pimephales promelas OX=90988 GN=dstyk PE=2 SV=1
contig_7dpi0531497	0.172939	SND1_DANRE Staphylococcal nuclease domain-containing protein 1 OS=Danio rerio OX=7955 GN=snd1 PE=2 SV=1
contig_7dpi0012733	1.64126	SMY2B_DANRE N-lysine methyltransferase SMYD2-B OS=Danio rerio OX=7955 GN=smyd2b PE=2 SV=2
contig_7dpi0071304	0.174816	FGGY_DANRE FGGY carbohydrate kinase domain-containing protein OS=Danio rerio OX=7955 GN=fggy PE=2 SV=2
contig_7dpi0005082	1.78648	OFD1_DANRE Oral-facial-digital syndrome 1 protein homolog OS=Danio rerio OX=7955 GN=ofd1 PE=2 SV=1
contig_7dpi0040748	3.59191	SOMA_HYPMO Somatotropin OS=Hypophthalmichthys molitrix OX=13095 GN=gh PE=2 SV=1
contig_7dpi0036204	2.60969	INS_ANGRO Insulin OS=Anguilla rostrata OX=7938 GN=ins PE=1 SV=1
contig_7dpi0017909	0.0933585	HEAT1_DANRE HEAT repeat-containing protein 1 OS=Danio rerio OX=7955 GN=heatr1 PE=2 SV=1
contig_7dpi0071159	1.0434	GPR85_DANRE Probable G protein-coupled receptor 85 OS=Danio rerio OX=7955 GN=gpr85 PE=2 SV=1
contig_7dpi0015967	6.42867	MMS22_DANRE Protein MMS22-like OS=Danio rerio OX=7955 GN=mms22l PE=2 SV=1
contig_7dpi0027288	4.60679	S238B_DANRE Mitochondrial glycine transporter B OS=Danio rerio OX=7955 GN=slc25a38b PE=2 SV=2
contig_7dpi0094455	3.61167	INS2_KATPE Insulin-2 OS=Katsuwonus pelamis OX=8226 PE=1 SV=1
contig_7dpi0084410	6.74289	AGR2_DANRE Anterior gradient protein 2 homolog OS=Danio rerio OX=7955 GN=agr2 PE=2 SV=1
contig_7dpi0082574		not available
contig_7dpi0002270	8.60447	TGT_DANRE Queuine tRNA-ribosyltransferase catalytic subunit 1 OS=Danio rerio OX=7955 GN=qtrt1 PE=2 SV=1
contig_7dpi0011047	0.456376	BICL2_DANRE BICD family-like cargo adapter 2 OS=Danio rerio OX=7955 GN=bicdl2 PE=2 SV=1
contig_7dpi0063026	1.08423	CMTR2_DANRE Cap-specific mRNA (nucleoside-2'-O-)-methyltransferase 2 OS=Danio rerio OX=7955 GN=cmtr2 PE=2 SV=1
contig_7dpi0007177	0.228874	JADE3_DANRE Protein Jade-3 OS=Danio rerio OX=7955 GN=jade3 PE=2 SV=1
contig_7dpi0016672	2.4909	CAM1B_DANRE Calmodulin-regulated spectrin-associated protein 1-B OS=Danio rerio OX=7955 GN=camsap1b PE=3 SV=1
contig_7dpi0005077	0.0755282	WAC_DANRE WW domain-containing adapter protein with coiled-coil OS=Danio rerio OX=7955 GN=waca PE=2 SV=1
contig_7dpi0056553	0.450606	MTFR1_DANRE Mitochondrial fission regulator 1 OS=Danio rerio OX=7955 GN=mtfr1 PE=2 SV=1
contig_7dpi0004203	0.577637	NAA20_DANRE N-alpha-acetyltransferase 20 OS=Danio rerio OX=7955 GN=naa20 PE=2 SV=1
contig_7dpi0024995	6.31802e-06	NAA60_DANRE N-alpha-acetyltransferase 60 OS=Danio rerio OX=7955 GN=naa60 PE=2 SV=1
contig_7dpi0004560	0.07027	MYSS_CYPCA Myosin heavy chain, fast skeletal muscle OS=Cyprinus carpio OX=7962 PE=2 SV=2
contig_7dpi0005900	2.19044e-156	PSA2_CARAU Proteasome subunit alpha type-2 OS=Carassius auratus OX=7957 GN=psma2 PE=2 SV=3
contig_7dpi0008773	1.05326	Z385B_DANRE Zinc finger protein 385B OS=Danio rerio OX=7955 GN=znf385b PE=2 SV=1
contig_7dpi0004635	3.42689	MTX3_DANRE Metaxin-3 OS=Danio rerio OX=7955 GN=mtx3 PE=2 SV=2
contig_7dpi0030045	1.16251e-06	MTB_SALSA Metallothionein B OS=Salmo salar OX=8030 GN=mtb PE=3 SV=1
contig_7dpi0043133	3.06803	CXE1_DANRE Gap junction epsilon-1 protein OS=Danio rerio OX=7955 GN=cx23 PE=2 SV=1
contig_7dpi0058106	1.25969	PIM2_DANRE Serine/threonine-protein kinase pim-2 OS=Danio rerio OX=7955 GN=pim2 PE=2 SV=2
contig_7dpi0031604	1.86788	SPDLY_DANRE Protein Spindly OS=Danio rerio OX=7955 GN=spdl1 PE=2 SV=1
contig_7dpi0017539	0.669054	XPOT_DANRE Exportin-T OS=Danio rerio OX=7955 GN=xpot PE=3 SV=1
contig_7dpi0020409	0.564576	SERP3_DANRE Probable serpin E3 OS=Danio rerio OX=7955 GN=serpine3 PE=3 SV=1
contig_7dpi0001297	1.44507e-16	PSB3_ONCMY Proteasome subunit beta type-3 OS=Oncorhynchus mykiss OX=8022 GN=psmb3 PE=2 SV=1
contig_7dpi0000551	1.0582e-119	VRK1_DANRE Serine/threonine-protein kinase VRK1 OS=Danio rerio OX=7955 GN=vrk1 PE=2 SV=1
contig_7dpi0016808	0.327431	SSUH2_DANRE Protein SSUH2 homolog OS=Danio rerio OX=7955 GN=ssuh2 PE=2 SV=2
contig_7dpi0002551	3.43204e-06	PSA2_CARAU Proteasome subunit alpha type-2 OS=Carassius auratus OX=7957 GN=psma2 PE=2 SV=3
contig_7dpi0003227	1.07387e-108	5NT3_DANRE Cytosolic 5'-nucleotidase 3 OS=Danio rerio OX=7955 GN=nt5c3 PE=2 SV=2
contig_7dpi0007026	0.803723	ST1S1_DANRE Cytosolic sulfotransferase 1 OS=Danio rerio OX=7955 GN=sult1st1 PE=1 SV=1
contig_7dpi0004677	0.428588	CSN4_DANRE COP9 signalosome complex subunit 4 OS=Danio rerio OX=7955 GN=cops4 PE=2 SV=1
contig_7dpi0016385	9.61773e-49	MC25A_DANRE MICOS complex subunit mic25a OS=Danio rerio OX=7955 GN=chchd6a PE=2 SV=1
contig_7dpi0000137	3.12507e-07	RFOX1_DANRE RNA binding protein fox-1 homolog 1 OS=Danio rerio OX=7955 GN=rbfox1 PE=2 SV=1
contig_7dpi0001187	0.528625	ETV4_DANRE ETS translocation variant 4 OS=Danio rerio OX=7955 GN=etv4 PE=1 SV=2
contig_7dpi0009370	8.99554	IPRI_DANRE Inositol 1,4,5-trisphosphate receptor-interacting protein OS=Danio rerio OX=7955 GN=itprip PE=2 SV=1
contig_7dpi0016128	0.000154985	GPX8_TETNG Probable glutathione peroxidase 8 OS=Tetraodon nigroviridis OX=99883 GN=gpx8 PE=3 SV=1
contig_7dpi0010215	1.30523	STB1B_DANRE Histone-lysine N-methyltransferase SETDB1-B OS=Danio rerio OX=7955 GN=setdb1b PE=2 SV=2
contig_7dpi0016168	0.251197	SPE39_DANRE Spermatogenesis-defective protein 39 homolog OS=Danio rerio OX=7955 GN=vipas39 PE=2 SV=1
contig_7dpi0034029	3.2702e-18	IF4A3_SALSA Eukaryotic initiation factor 4A-III OS=Salmo salar OX=8030 GN=eif4a3 PE=2 SV=1
contig_7dpi0002008		not available
contig_7dpi0027076	3.60399e-06	LHPP_DANRE Phospholysine phosphohistidine inorganic pyrophosphate phosphatase OS=Danio rerio OX=7955 GN=lhpp PE=2 SV=1
contig_7dpi0006553	8.09179e-20	H32_DANRE Histone H3.2 OS=Danio rerio OX=7955 GN=zgc:113984 PE=2 SV=3
contig_7dpi0001266	0.269281	HD_TAKRU Huntingtin OS=Takifugu rubripes OX=31033 GN=htt PE=3 SV=1
contig_7dpi0006232	2.27685	CP2K6_DANRE Cytochrome P450 2K6 OS=Danio rerio OX=7955 GN=cyp2k6 PE=1 SV=1
contig_7dpi0021956	2.84597	ZYG11_DANRE Protein zyg-11 homolog OS=Danio rerio OX=7955 GN=zyg11 PE=2 SV=1
contig_7dpi0009657	0.634782	CTL5B_DANRE Choline transporter-like protein 5-B (Fragment) OS=Danio rerio OX=7955 GN=slc44a5b PE=3 SV=1
contig_7dpi0132644	4.29325	NAA35_DANRE N-alpha-acetyltransferase 35, NatC auxiliary subunit OS=Danio rerio OX=7955 GN=naa35 PE=2 SV=1
contig_7dpi0032487	1.50748	SPS1_DANRE Selenide, water dikinase 1 OS=Danio rerio OX=7955 GN=sephs1 PE=1 SV=2
contig_7dpi0006334	4.69477	NMD3_DANRE 60S ribosomal export protein NMD3 OS=Danio rerio OX=7955 GN=nmd3 PE=2 SV=1
contig_7dpi0023533	1.0101e-06	RFOX1_DANRE RNA binding protein fox-1 homolog 1 OS=Danio rerio OX=7955 GN=rbfox1 PE=2 SV=1
contig_7dpi0028838	0.539391	BTBBA_DANRE Ankyrin repeat and BTB/POZ domain-containing protein BTBD11-A OS=Danio rerio OX=7955 GN=btbd11a PE=3 SV=2
contig_7dpi0021169	0.226797	HXC9A_TAKRU Homeobox protein Hox-C9a OS=Takifugu rubripes OX=31033 GN=hoxc9a PE=3 SV=2
contig_7dpi0014405	1.02763e-21	TRY3_SALSA Trypsin-3 (Fragment) OS=Salmo salar OX=8030 PE=1 SV=1
contig_7dpi0029162	5.53974e-13	SC61G_GADMO Protein transport protein Sec61 subunit gamma OS=Gadus morhua OX=8049 GN=sec61g PE=3 SV=1
contig_7dpi0010691	4.52175e-05	SART3_DANRE Squamous cell carcinoma antigen recognized by T-cells 3 OS=Danio rerio OX=7955 GN=sart3 PE=2 SV=1
contig_7dpi0018738	3.19114	GLCEB_DANRE D-glucuronyl C5-epimerase B OS=Danio rerio OX=7955 GN=glceb PE=1 SV=1
contig_7dpi0009573	7.97528	ADRO_SALFO NADPH:adrenodoxin oxidoreductase, mitochondrial OS=Salvelinus fontinalis OX=8038 GN=fdxr PE=2 SV=1
contig_7dpi0015202	1.47269	COX1_FORLA Cytochrome c oxidase subunit 1 OS=Formosania lacustris OX=7980 GN=mt-co1 PE=3 SV=1
contig_7dpi0006470	6.52753	DHDH_DANRE Trans-1,2-dihydrobenzene-1,2-diol dehydrogenase OS=Danio rerio OX=7955 GN=dhdh PE=2 SV=2
contig_7dpi0024578	2.40311	VPS18_DANRE Vacuolar protein sorting-associated protein 18 homolog OS=Danio rerio OX=7955 GN=vps18 PE=2 SV=2
contig_7dpi0004670	6.33125	FEN1_ANOFI Flap endonuclease 1 OS=Anoplopoma fimbria OX=229290 GN=fen1 PE=2 SV=1
contig_7dpi0006043	6.44588e-64	RHOAC_DANRE Rho-related GTP-binding protein RhoA-C OS=Danio rerio OX=7955 GN=rhoac PE=1 SV=1
contig_7dpi0000402	1.46268e-12	CALM_OREMO Calmodulin OS=Oreochromis mossambicus OX=8127 GN=calm PE=2 SV=3
contig_7dpi0039066	0.977225	TEN4_DANRE Teneurin-4 OS=Danio rerio OX=7955 GN=tenm4 PE=2 SV=1
contig_7dpi0013370	0.0278313	SART3_DANRE Squamous cell carcinoma antigen recognized by T-cells 3 OS=Danio rerio OX=7955 GN=sart3 PE=2 SV=1
contig_7dpi0032818	1.59215	PXL2C_TAKRU Peroxiredoxin-like 2C OS=Takifugu rubripes OX=31033 GN=prxl2c PE=3 SV=1
contig_7dpi0015687	9.14935e-82	H2AZ_ONCMY Histone H2A.Z OS=Oncorhynchus mykiss OX=8022 GN=h2afz PE=1 SV=4
contig_7dpi0038619	1.19103	GCNFB_DANRE Nuclear receptor subfamily 6 group A member 1-B OS=Danio rerio OX=7955 GN=nr6a1b PE=2 SV=1
contig_7dpi0168553	0.300331	GLRX3_DANRE Glutaredoxin 3 OS=Danio rerio OX=7955 GN=glrx3 PE=2 SV=1
contig_7dpi0038149	0.795527	TTLL3_DANRE Tubulin monoglycylase TTLL3 OS=Danio rerio OX=7955 GN=ttll3 PE=2 SV=1
contig_7dpi0022390	7.38784	UBC9_PAGMA SUMO-conjugating enzyme UBC9 OS=Pagrus major OX=143350 GN=ube2i PE=2 SV=1
contig_7dpi0053368	6.50119	BOP1_DANRE Ribosome biogenesis protein bop1 OS=Danio rerio OX=7955 GN=bop1 PE=2 SV=1
contig_7dpi0008913	3.29617	SF3B3_DANRE Splicing factor 3B subunit 3 OS=Danio rerio OX=7955 GN=sf3b3 PE=2 SV=1
contig_7dpi0024469	9.62845	OLF3B_DANRE Olfactomedin-like protein 3B OS=Danio rerio OX=7955 GN=olfml3b PE=2 SV=1
contig_7dpi0081816	0.670678	SPCS_DANRE O-phosphoseryl-tRNA(Sec) selenium transferase OS=Danio rerio OX=7955 GN=sepsecs PE=2 SV=1
contig_7dpi0027261	5.17394	ZWILC_DANRE Protein zwilch homolog OS=Danio rerio OX=7955 GN=zwilch PE=2 SV=1
contig_7dpi0027456	4.05674	LYSM4_DANRE LysM and putative peptidoglycan-binding domain-containing protein 4 OS=Danio rerio OX=7955 GN=lysmd4 PE=2 SV=2
contig_7dpi0062557	5.00381	AT2B2_OREMO Plasma membrane calcium-transporting ATPase 2 (Fragment) OS=Oreochromis mossambicus OX=8127 GN=atp2b2 PE=2 SV=1
contig_7dpi0023414	1.82524	NU5M_SALSA NADH-ubiquinone oxidoreductase chain 5 OS=Salmo salar OX=8030 GN=MT-ND5 PE=3 SV=1
contig_7dpi0008796	2.47081	GST82_DICLA Glutathione S-transferase 8.2 (Fragments) OS=Dicentrarchus labrax OX=13489 PE=1 SV=1
contig_7dpi0028782		not available
contig_7dpi0003350	9.87052	MED12_DANRE Mediator of RNA polymerase II transcription subunit 12 OS=Danio rerio OX=7955 GN=med12 PE=2 SV=1
contig_7dpi0000872		not available
contig_7dpi0017109	8.38584e-26	LDHBA_DANRE L-lactate dehydrogenase B-A chain OS=Danio rerio OX=7955 GN=ldhba PE=2 SV=4
contig_7dpi0028511	0.377522	NU3M_PAROL NADH-ubiquinone oxidoreductase chain 3 OS=Paralichthys olivaceus OX=8255 GN=MT-ND3 PE=3 SV=2
contig_7dpi0007541	0.139925	TMUB1_DANRE Transmembrane and ubiquitin-like domain-containing protein 1 OS=Danio rerio OX=7955 GN=tmub1 PE=2 SV=1
contig_7dpi0026140	4.97283	STXA_SYNVE Neoverrucotoxin subunit alpha OS=Synanceia verrucosa OX=51996 PE=1 SV=1
contig_7dpi0007495	1.45493	T41AA_DANRE Transmembrane protein 41A-A OS=Danio rerio OX=7955 GN=tmem41aa PE=2 SV=1
contig_7dpi0023217		not available
contig_7dpi0018887	2.93254	PGFRA_TAKRU Platelet-derived growth factor receptor alpha OS=Takifugu rubripes OX=31033 GN=pdgfra PE=3 SV=1
contig_7dpi0013215	2.21278	ALBU1_SALSA Serum albumin 1 OS=Salmo salar OX=8030 GN=alb1 PE=2 SV=1
contig_7dpi0263321	3.88294	VGFR2_DANRE Vascular endothelial growth factor receptor 2 OS=Danio rerio OX=7955 GN=kdr PE=1 SV=2
contig_7dpi0024990	0.118409	TLK2_DANRE Serine/threonine-protein kinase tousled-like 2 OS=Danio rerio OX=7955 GN=tlk2 PE=2 SV=2
contig_7dpi0001689	0.0409521	RNF8_DANRE E3 ubiquitin-protein ligase rnf8 OS=Danio rerio OX=7955 GN=rnf8 PE=2 SV=1
contig_7dpi0008074		not available
contig_7dpi0009745	5.98272e-36	TM258_DANRE Transmembrane protein 258 OS=Danio rerio OX=7955 GN=tmem258 PE=3 SV=1
contig_7dpi0009854	1.9003	M10B1_DANRE Putative helicase mov-10-B.1 OS=Danio rerio OX=7955 GN=mov10b.1 PE=2 SV=2
contig_7dpi0002819		not available
contig_7dpi0019011	1.64427	CHSTA_DANRE Carbohydrate sulfotransferase 10 OS=Danio rerio OX=7955 GN=chst10 PE=2 SV=1
contig_7dpi0017016	3.70022	NIP7_TETNG 60S ribosome subunit biogenesis protein NIP7 homolog OS=Tetraodon nigroviridis OX=99883 GN=nip7 PE=3 SV=1
contig_7dpi0685471	0.649342	WDR4_DANRE tRNA (guanine-N(7)-)-methyltransferase non-catalytic subunit wdr4 OS=Danio rerio OX=7955 GN=wdr4 PE=2 SV=2
contig_7dpi0011665	1.37644e-19	CPSF5_DANRE Cleavage and polyadenylation specificity factor subunit 5 OS=Danio rerio OX=7955 GN=nudt21 PE=2 SV=1
contig_7dpi0104376	0.297866	COR1C_DANRE Coronin-1C-A OS=Danio rerio OX=7955 GN=coro1ca PE=2 SV=1
contig_7dpi0018308	7.36073e-59	CH10_ORYLA 10 kDa heat shock protein, mitochondrial OS=Oryzias latipes OX=8090 GN=hspe1 PE=3 SV=1
contig_7dpi0053759		not available
contig_7dpi0027693	1.61022e-86	H2AZ_ONCMY Histone H2A.Z OS=Oncorhynchus mykiss OX=8022 GN=h2afz PE=1 SV=4
contig_7dpi0007367	1.53685	HBAC_OPHSE Hemoglobin cathodic subunit alpha OS=Ophisurus serpens OX=1234705 PE=1 SV=1
contig_7dpi0009642	0.769296	TBX6_DANRE T-box transcription factor TBX6 OS=Danio rerio OX=7955 GN=tbx6 PE=2 SV=2
contig_7dpi0022086	1.25026e-67	NMT2_DANRE Glycylpeptide N-tetradecanoyltransferase 2 OS=Danio rerio OX=7955 GN=nmt2 PE=2 SV=2
contig_7dpi0001284	4.05889	CYFP1_DANRE Cytoplasmic FMR1-interacting protein 1 homolog OS=Danio rerio OX=7955 GN=cyfip1 PE=2 SV=1
contig_7dpi0086837	0.633962	B2MG_LABIN Beta-2-microglobulin OS=Labeobarbus intermedius OX=40831 GN=b2m PE=3 SV=1
contig_7dpi0082689	0.346157	M10B1_DANRE Putative helicase mov-10-B.1 OS=Danio rerio OX=7955 GN=mov10b.1 PE=2 SV=2
contig_7dpi0026724	1.05703e-46	HMOX_TAKRU Heme oxygenase OS=Takifugu rubripes OX=31033 GN=hmox PE=3 SV=1
contig_7dpi0011310	3.69623e-66	TPISB_DANRE Triosephosphate isomerase B OS=Danio rerio OX=7955 GN=tpi1b PE=2 SV=1
contig_7dpi0017326	4.90302	MX1_ICTPU Interferon-induced GTP-binding protein Mx1 OS=Ictalurus punctatus OX=7998 GN=mx1 PE=2 SV=1
contig_7dpi0009283	1.35007e-32	LLPH_DANRE Protein LLP homolog OS=Danio rerio OX=7955 GN=llph PE=2 SV=1
contig_7dpi0011100	7.6371	FJX1_XIPMA Four-jointed box protein 1 OS=Xiphophorus maculatus OX=8083 GN=fjx1 PE=2 SV=1
contig_7dpi0003022	6.38045e-44	G3P_DANRE Glyceraldehyde-3-phosphate dehydrogenase OS=Danio rerio OX=7955 GN=gapdh PE=2 SV=2
contig_7dpi0036082	2.07314	ERI2_DANRE ERI1 exoribonuclease 2 OS=Danio rerio OX=7955 GN=eri2 PE=2 SV=1
contig_7dpi0404901	3.12176e-05	BT3L4_DANRE Transcription factor BTF3 homolog 4 OS=Danio rerio OX=7955 GN=btf3l4 PE=2 SV=1
contig_7dpi0126282	1.01252	EIF3L_DANRE Eukaryotic translation initiation factor 3 subunit L OS=Danio rerio OX=7955 GN=eif3l PE=2 SV=1
contig_7dpi0041604	4.28674e-07	CREL2_DANRE Cysteine-rich with EGF-like domain protein 2 OS=Danio rerio OX=7955 GN=creld2 PE=2 SV=2
contig_7dpi0042598	1.03425	ABH2B_DANRE Monoacylglycerol lipase ABHD2 OS=Danio rerio OX=7955 GN=abhd2b PE=2 SV=1
contig_7dpi0017063	2.74856e-06	CXAR_DANRE Coxsackievirus and adenovirus receptor homolog OS=Danio rerio OX=7955 GN=cxadr PE=2 SV=1
contig_7dpi0004004	1.31986	SHP2B_DANRE Phosphatidylinositol 3,4,5-trisphosphate 5-phosphatase 2B OS=Danio rerio OX=7955 GN=inppl1b PE=2 SV=1
contig_7dpi0026189	1.3877	SC4AA_TETNG Sodium channel protein type 4 subunit alpha A OS=Tetraodon nigroviridis OX=99883 GN=scn4aa PE=3 SV=2
contig_7dpi0000561	1.96275e-06	CHRD1_DANRE Cysteine and histidine-rich domain-containing protein 1 OS=Danio rerio OX=7955 GN=chordc1 PE=2 SV=1
contig_7dpi0002413		not available
contig_7dpi0052578	0.108184	RCOR2_DANRE REST corepressor 2 OS=Danio rerio OX=7955 GN=rcor2 PE=2 SV=1
contig_7dpi0039296		not available
contig_7dpi0000982	5.9772	GARL3_DANRE GTPase-activating Rap/Ran-GAP domain-like protein 3 OS=Danio rerio OX=7955 GN=garnl3 PE=3 SV=1
contig_7dpi0027665	0.0537194	TGFA1_DANRE Transforming growth factor-beta receptor-associated protein 1 homolog OS=Danio rerio OX=7955 GN=tgfbrap1 PE=2 SV=1
contig_7dpi0032247	3.40875	SSRA_ONCMY Translocon-associated protein subunit alpha OS=Oncorhynchus mykiss OX=8022 GN=ssr1 PE=2 SV=1
contig_7dpi0016822	7.80648	INT11_DANRE Integrator complex subunit 11 OS=Danio rerio OX=7955 GN=cpsf3l PE=2 SV=1
contig_7dpi0071021	0.5588	B3G5B_DANRE Lactosylceramide 1,3-N-acetyl-beta-D-glucosaminyltransferase B OS=Danio rerio OX=7955 GN=b3gnt5b PE=2 SV=1
contig_7dpi0026343	2.24845e-05	PK1L1_ORYLA Polycystic kidney disease 1 like 1 OS=Oryzias latipes OX=8090 GN=pkd1l1 PE=1 SV=2
contig_7dpi0015251	4.67532	NIPLB_DANRE Nipped-B-like protein B OS=Danio rerio OX=7955 GN=nipblb PE=2 SV=1
contig_7dpi0001677	1.21612e-18	NDK6_DANRE Nucleoside diphosphate kinase 6 OS=Danio rerio OX=7955 GN=nme6 PE=2 SV=1
contig_7dpi0004779	8.0805e-33	HDAC3_TETNG Histone deacetylase 3 OS=Tetraodon nigroviridis OX=99883 GN=hdac3 PE=3 SV=1
contig_7dpi0000346	4.11821e-30	H2AV_DANRE Histone H2A.V OS=Danio rerio OX=7955 GN=h2afv PE=2 SV=3
contig_7dpi0001278	5.26322e-64	STK3_DANRE Serine/threonine-protein kinase 3 OS=Danio rerio OX=7955 GN=stk3 PE=2 SV=1
contig_7dpi0014629	6.68108	NGLY1_DANRE Peptide-N(4)-(N-acetyl-beta-glucosaminyl)asparagine amidase OS=Danio rerio OX=7955 GN=ngly1 PE=2 SV=1
contig_7dpi0009468	0.403339	HD_TAKRU Huntingtin OS=Takifugu rubripes OX=31033 GN=htt PE=3 SV=1
contig_7dpi0023245	9.53983	CENPM_DANRE Centromere protein M OS=Danio rerio OX=7955 GN=cenpm PE=2 SV=1
contig_7dpi0027990	5.622	CO3_ONCMY Complement C3 (Fragment) OS=Oncorhynchus mykiss OX=8022 GN=c3 PE=1 SV=1
contig_7dpi0069322		not available
contig_7dpi0007480	3.15164	TIKI1_DANRE Metalloprotease TIKI1 OS=Danio rerio OX=7955 GN=trabd2a PE=2 SV=2
contig_7dpi0003306	0.0586146	FCHO2_DANRE F-BAR domain only protein 2 OS=Danio rerio OX=7955 GN=fcho2 PE=2 SV=1
contig_7dpi0001913	1.03793e-53	NDKB_MERME Nucleoside diphosphate kinase B (Fragments) OS=Merluccius merluccius OX=8063 GN=nme2 PE=1 SV=1
contig_7dpi0004335	0.832267	PTAR1_DANRE Protein prenyltransferase alpha subunit repeat-containing protein 1 OS=Danio rerio OX=7955 GN=ptar1 PE=2 SV=1
contig_7dpi0009951	0	ALDOA_SALSA Fructose-bisphosphate aldolase A OS=Salmo salar OX=8030 PE=1 SV=1
contig_7dpi0007396	1.48968	CE290_DANRE Centrosomal protein of 290 kDa OS=Danio rerio OX=7955 GN=cep290 PE=2 SV=1
contig_7dpi0018807	2.90478	CYBC1_DANRE Cytochrome b-245 chaperone 1 homolog OS=Danio rerio OX=7955 GN=cybc1 PE=2 SV=1
contig_7dpi0001956	0.813487	T151B_DANRE Transmembrane protein 151B OS=Danio rerio OX=7955 GN=tmem151b PE=2 SV=1
contig_7dpi0018938	0.00151869	UCP2_DANRE Mitochondrial uncoupling protein 2 OS=Danio rerio OX=7955 GN=ucp2 PE=2 SV=1
contig_7dpi0000312	1.39319	DRC4_DANRE Dynein regulatory complex subunit 4 OS=Danio rerio OX=7955 GN=gas8 PE=2 SV=1
contig_7dpi0072129	2.99119e-07	COX6B_THUOB Cytochrome c oxidase subunit 6B (Fragments) OS=Thunnus obesus OX=8241 PE=1 SV=2
contig_7dpi0001155	2.16108	HS90B_DANRE Heat shock protein HSP 90-beta OS=Danio rerio OX=7955 GN=hsp90ab1 PE=1 SV=2
contig_7dpi0003236	7.42347e-134	CCNB1_CARAU G2/mitotic-specific cyclin-B1 OS=Carassius auratus OX=7957 GN=ccnb1 PE=2 SV=1
contig_7dpi0007649	0.0339711	ACHN3_CARAU Neuronal acetylcholine receptor subunit non-alpha-3 OS=Carassius auratus OX=7957 PE=2 SV=1
contig_7dpi0071936	2.53426	RFX2_DANRE DNA-binding protein RFX2 OS=Danio rerio OX=7955 GN=rfx2 PE=2 SV=1
contig_7dpi0009586	4.9162	HXA1A_TAKRU Homeobox protein Hox-A1a OS=Takifugu rubripes OX=31033 GN=hoxa1a PE=3 SV=1
contig_7dpi0008067	2.45539	EFNMT_DANRE eEF1A lysine and N-terminal methyltransferase OS=Danio rerio OX=7955 GN=eef1aknmt PE=2 SV=1
contig_7dpi0023876		not available
contig_7dpi0492994	2.45809	UBE2Z_DANRE Ubiquitin-conjugating enzyme E2 Z OS=Danio rerio OX=7955 GN=ube2z PE=2 SV=2
contig_7dpi0018702	0.588583	HEM0_DANRE 5-aminolevulinate synthase, erythroid-specific, mitochondrial OS=Danio rerio OX=7955 GN=alas2 PE=2 SV=1
contig_7dpi0022130		not available
contig_7dpi0028016	0.46624	PSA2_CARAU Proteasome subunit alpha type-2 OS=Carassius auratus OX=7957 GN=psma2 PE=2 SV=3
contig_7dpi0004860	1.3626e-39	UB2V2_DANRE Ubiquitin-conjugating enzyme E2 variant 2 OS=Danio rerio OX=7955 GN=ube2v2 PE=2 SV=1
contig_7dpi0031112	0.941042	CPPED_DANRE Serine/threonine-protein phosphatase CPPED1 OS=Danio rerio OX=7955 GN=cpped1 PE=2 SV=1
contig_7dpi0004625	9.90395e-57	SPCS2_DANRE Probable signal peptidase complex subunit 2 OS=Danio rerio OX=7955 GN=spcs2 PE=2 SV=1
contig_7dpi0012138	4.47245	SOX8_TETNG Transcription factor Sox-8 OS=Tetraodon nigroviridis OX=99883 GN=sox8 PE=2 SV=2
contig_7dpi0001484	3.91247	DI2BA_DANRE Disco-interacting protein 2 homolog B-A OS=Danio rerio OX=7955 GN=dip2ba PE=2 SV=1
contig_7dpi0004510	9.83516	VP26B_DANRE Vacuolar protein sorting-associated protein 26B OS=Danio rerio OX=7955 GN=vps26b PE=2 SV=1
contig_7dpi0018067	3.24568	TKN1_CARAU Protachykinin OS=Carassius auratus OX=7957 PE=1 SV=2
contig_7dpi0013104	0.000793449	ABCB8_DANRE ATP-binding cassette sub-family B member 8, mitochondrial OS=Danio rerio OX=7955 GN=abcb8 PE=2 SV=1
contig_7dpi0062053	8.30838e-08	ISK1_ANGAN Probable pancreatic secretory proteinase inhibitor OS=Anguilla anguilla OX=7936 PE=1 SV=1
contig_7dpi0003066	1.30401e-16	SPAG1_DANRE Sperm-associated antigen 1A OS=Danio rerio OX=7955 GN=spag1a PE=2 SV=1
contig_7dpi0033413	1.6472	STB5L_DANRE Syntaxin-binding protein 5-like OS=Danio rerio OX=7955 GN=stxbp5l PE=3 SV=1
contig_7dpi0097516	0.295746	NAA60_DANRE N-alpha-acetyltransferase 60 OS=Danio rerio OX=7955 GN=naa60 PE=2 SV=1
contig_7dpi0000134	0	AP2MA_DANRE AP-2 complex subunit mu-A OS=Danio rerio OX=7955 GN=ap2m1a PE=2 SV=1
contig_7dpi0014166	9.1346e-16	CDK1_CARAU Cyclin-dependent kinase 1 OS=Carassius auratus OX=7957 GN=cdk1 PE=2 SV=1
contig_7dpi0034436	1.2497	JAK1_CYPCA Tyrosine-protein kinase JAK1 OS=Cyprinus carpio OX=7962 GN=jak1 PE=2 SV=1
contig_7dpi0005368	8.1349	RIR2_DANRE Ribonucleoside-diphosphate reductase subunit M2 OS=Danio rerio OX=7955 GN=rrm2 PE=1 SV=1
contig_7dpi0009224	1.79462	HEM0_OPSTA 5-aminolevulinate synthase, erythroid-specific, mitochondrial OS=Opsanus tau OX=8068 GN=alas2 PE=2 SV=1
contig_7dpi0023197	1.21724	ADA2A_DANRE Alpha-2A adrenergic receptor OS=Danio rerio OX=7955 GN=adra2a PE=3 SV=1
contig_7dpi0019761		not available
contig_7dpi0019860	2.73746	ARI1_DANRE E3 ubiquitin-protein ligase arih1 OS=Danio rerio OX=7955 GN=arih1 PE=2 SV=1
contig_7dpi0042172	0.174926	FGFR4_DANRE Fibroblast growth factor receptor 4 OS=Danio rerio OX=7955 GN=fgfr4 PE=1 SV=1
contig_7dpi0002588	9.75219	WASC5_DANRE WASH complex subunit 5 OS=Danio rerio OX=7955 GN=washc5 PE=2 SV=1
contig_7dpi0075189	2.18793	IKKA_DANRE Inhibitor of nuclear factor kappa-B kinase subunit alpha OS=Danio rerio OX=7955 GN=chuk PE=1 SV=1
contig_7dpi0530658	4.2087e-09	RL7A_TAKRU 60S ribosomal protein L7a OS=Takifugu rubripes OX=31033 GN=rpl7a PE=3 SV=3
contig_7dpi0029405	0.4248	HXC3A_DANRE Homeobox protein Hox-C3a OS=Danio rerio OX=7955 GN=hoxc3a PE=2 SV=1
contig_7dpi0018008		not available
contig_7dpi0019859	0.234688	TRFE_PAROL Serotransferrin OS=Paralichthys olivaceus OX=8255 GN=tf PE=2 SV=1
contig_7dpi0004512	0.749511	ATP9B_DANRE Probable phospholipid-transporting ATPase IIB OS=Danio rerio OX=7955 GN=atp9b PE=3 SV=1
contig_7dpi0024266	1.02422	GNPTA_DANRE N-acetylglucosamine-1-phosphotransferase subunits alpha/beta OS=Danio rerio OX=7955 GN=gnptab PE=1 SV=1
contig_7dpi0002782	2.23442e-33	FRIM_SALSA Ferritin, middle subunit OS=Salmo salar OX=8030 PE=2 SV=1
contig_7dpi0000938	0	PPB_GADMO Alkaline phosphatase OS=Gadus morhua OX=8049 PE=1 SV=1
contig_7dpi0000379	1.39741	ANPRB_ANGJA Atrial natriuretic peptide receptor 2 OS=Anguilla japonica OX=7937 GN=npr2 PE=2 SV=1
contig_7dpi0048817	0.723914	ATG3_DANRE Ubiquitin-like-conjugating enzyme ATG3 OS=Danio rerio OX=7955 GN=atg3 PE=2 SV=1
contig_7dpi0009443	0.195209	LST8_DANRE Target of rapamycin complex subunit lst8 OS=Danio rerio OX=7955 GN=mlst8 PE=2 SV=1
contig_7dpi0010267	2.06716e-14	SNX30_DANRE Sorting nexin-30 OS=Danio rerio OX=7955 GN=snx30 PE=2 SV=1
contig_7dpi0208262	2.00457	CTL4_DANRE Choline transporter-like protein 4 OS=Danio rerio OX=7955 GN=slc44a4 PE=2 SV=1
contig_7dpi0160591	0.000794472	RARGA_DANRE Retinoic acid receptor gamma-A OS=Danio rerio OX=7955 GN=rarga PE=1 SV=2
contig_7dpi0022326	2.1145	KITA_DANRE Mast/stem cell growth factor receptor kita OS=Danio rerio OX=7955 GN=kita PE=2 SV=2
contig_7dpi0006503	2.06865	FGR1A_DANRE Fibroblast growth factor receptor 1-A OS=Danio rerio OX=7955 GN=fgfr1a PE=1 SV=2
contig_7dpi0030096	0.789596	MTS1A_DANRE Microtubule-associated tumor suppressor 1 homolog A OS=Danio rerio OX=7955 GN=mtus1a PE=2 SV=1
contig_7dpi0012463	1.22744	PHR_CARAU Deoxyribodipyrimidine photo-lyase OS=Carassius auratus OX=7957 GN=phr PE=2 SV=1
contig_7dpi0037810	0.00291839	RL10_DANRE 60S ribosomal protein L10 OS=Danio rerio OX=7955 GN=rpl10 PE=2 SV=1
contig_7dpi0003882	0.410414	SSRA_ONCMY Translocon-associated protein subunit alpha OS=Oncorhynchus mykiss OX=8022 GN=ssr1 PE=2 SV=1
contig_7dpi0029262	2.54985	RIPR2_DANRE Rho family-interacting cell polarization regulator 2 OS=Danio rerio OX=7955 GN=ripor2 PE=2 SV=1
contig_7dpi0009182	0.314306	STK10_DANRE Serine/threonine-protein kinase 10 OS=Danio rerio OX=7955 GN=stk10 PE=2 SV=1
contig_7dpi0003151	3.53248	NAT8L_DANRE N-acetylaspartate synthetase OS=Danio rerio OX=7955 GN=nat8l PE=2 SV=1
contig_7dpi0003041	9.37091e-36	CPSF6_DANRE Cleavage and polyadenylation specificity factor subunit 6 OS=Danio rerio OX=7955 GN=cpsf6 PE=2 SV=1
contig_7dpi0000745	0.0162761	OPSP_ICTPU Parapinopsin OS=Ictalurus punctatus OX=7998 PE=2 SV=1
contig_7dpi0091174	2.20704	2ABD_DANRE Serine/threonine-protein phosphatase 2A 55 kDa regulatory subunit B delta isoform OS=Danio rerio OX=7955 GN=ppp2r2d PE=2 SV=1
contig_7dpi0007423	1.49245	TRFE_PAROL Serotransferrin OS=Paralichthys olivaceus OX=8255 GN=tf PE=2 SV=1
contig_7dpi0055221	1.58428	S35A5_DANRE Probable UDP-sugar transporter protein SLC35A5 OS=Danio rerio OX=7955 GN=slc35a5 PE=2 SV=1
contig_7dpi0039060	0.00168203	PARN_DANRE Poly(A)-specific ribonuclease PARN OS=Danio rerio OX=7955 GN=parn PE=1 SV=2
contig_7dpi0283252		not available
contig_7dpi0005217	9.61354	GLE1_DANRE Nucleoporin GLE1 OS=Danio rerio OX=7955 GN=gle1 PE=2 SV=2
contig_7dpi0003302	4.1405	PREP_DANRE Presequence protease, mitochondrial OS=Danio rerio OX=7955 GN=pitrm1 PE=2 SV=1
contig_7dpi0062751	3.84025	COR1C_DANRE Coronin-1C-A OS=Danio rerio OX=7955 GN=coro1ca PE=2 SV=1
contig_7dpi0102139	0.852633	REST_DANRE RE1-silencing transcription factor OS=Danio rerio OX=7955 GN=rest PE=2 SV=1
contig_7dpi0001369		not available
contig_7dpi0055664	2.88288	NXN_DANRE Nucleoredoxin OS=Danio rerio OX=7955 GN=nxn PE=2 SV=1
contig_7dpi0000103	0.112665	MY9AA_DANRE Unconventional myosin-IXAa OS=Danio rerio OX=7955 GN=myo9aa PE=3 SV=1
contig_7dpi0000859	6.55368e-11	LECG_THANI Galactose-specific lectin nattectin OS=Thalassophryne nattereri OX=289382 PE=1 SV=1
contig_7dpi0029702	4.14579e-37	CWC27_DANRE Spliceosome-associated protein CWC27 homolog OS=Danio rerio OX=7955 GN=cwc27 PE=2 SV=1
contig_7dpi0063348	0.842386	TRFE_ORYLA Serotransferrin OS=Oryzias latipes OX=8090 GN=tf PE=3 SV=1
contig_7dpi0053669	4.37196	BTBBA_DANRE Ankyrin repeat and BTB/POZ domain-containing protein BTBD11-A OS=Danio rerio OX=7955 GN=btbd11a PE=3 SV=2
contig_7dpi0017706	1.22255	WDR91_DANRE WD repeat-containing protein 91 OS=Danio rerio OX=7955 GN=wdr91 PE=1 SV=2
contig_7dpi0060718	1.52866e-18	RBM8A_SALSA RNA-binding protein 8A OS=Salmo salar OX=8030 GN=rbm8a PE=2 SV=1
contig_7dpi0016737		not available
contig_7dpi0053338		not available
contig_7dpi0031567	3.86515	KITA_DANRE Mast/stem cell growth factor receptor kita OS=Danio rerio OX=7955 GN=kita PE=2 SV=2
contig_7dpi0005767	9.25861e-37	COX41_THUOB Cytochrome c oxidase subunit 4 isoform 1, mitochondrial OS=Thunnus obesus OX=8241 PE=2 SV=1
contig_7dpi0008096	0.321464	PTPRU_DANRE Receptor-type tyrosine-protein phosphatase U OS=Danio rerio OX=7955 GN=ptpru PE=2 SV=1
contig_7dpi0001762	2.45233	TBX1_DANRE T-box transcription factor TBX1 OS=Danio rerio OX=7955 GN=tbx1 PE=2 SV=1
contig_7dpi0018542	0.506183	RP65B_DANRE All-trans-retinyl ester 13-cis isomerohydrolase OS=Danio rerio OX=7955 GN=rpe65b PE=1 SV=1
contig_7dpi0006882	3.71306e-28	S2539_DANRE Solute carrier family 25 member 39 OS=Danio rerio OX=7955 GN=slc25a39 PE=2 SV=1
contig_7dpi0001294		not available
contig_7dpi0030587	1.6858	LMBRL_DANRE Limb region 1 homolog-like protein OS=Danio rerio OX=7955 GN=lmbr1l PE=2 SV=1
contig_7dpi0009493	0	NUF2_DANRE Kinetochore protein Nuf2 OS=Danio rerio OX=7955 GN=nuf2 PE=2 SV=1
contig_7dpi0023440	0.570407	PTPRU_DANRE Receptor-type tyrosine-protein phosphatase U OS=Danio rerio OX=7955 GN=ptpru PE=2 SV=1
contig_7dpi0032140		not available
contig_7dpi0025496	7.19322e-45	BT3L4_DANRE Transcription factor BTF3 homolog 4 OS=Danio rerio OX=7955 GN=btf3l4 PE=2 SV=1
contig_7dpi0252867	0.196726	SETB2_DANRE Histone-lysine N-methyltransferase SETDB2 OS=Danio rerio OX=7955 GN=setdb2 PE=2 SV=2
contig_7dpi0015270	3.12709	AGRA3_DANRE Adhesion G protein-coupled receptor A3 OS=Danio rerio OX=7955 GN=adgra3 PE=1 SV=1
contig_7dpi0013432	1.98518	HIF1A_ONCMY Hypoxia-inducible factor 1-alpha OS=Oncorhynchus mykiss OX=8022 GN=hif1a PE=2 SV=1
contig_7dpi0003437	1.33791	T132E_DANRE Transmembrane protein 132E OS=Danio rerio OX=7955 GN=tmem132e PE=2 SV=1
contig_7dpi0088383	4.01858	RNPC3_DANRE RNA-binding region-containing protein 3 OS=Danio rerio OX=7955 GN=rnpc3 PE=2 SV=1
contig_7dpi0002194	8.47926	CHFR_DANRE E3 ubiquitin-protein ligase CHFR OS=Danio rerio OX=7955 GN=chfr PE=2 SV=1
contig_7dpi0007873	3.68616e-28	KIF22_DANRE Kinesin-like protein KIF22 OS=Danio rerio OX=7955 GN=kif22 PE=2 SV=1
contig_7dpi0000430	7.97511e-73	EF1A_DANRE Elongation factor 1-alpha OS=Danio rerio OX=7955 GN=eef1a PE=2 SV=1
contig_7dpi0015107	7.51973e-05	ISP2_BRASG Type-2 ice-structuring protein OS=Brachyopsis segaliensis OX=1633465 PE=1 SV=1
contig_7dpi0014169	9.92148e-33	NFI1L_DANRE NEDD4 family-interacting protein 1-like OS=Danio rerio OX=7955 GN=ndfip1l PE=2 SV=1
contig_7dpi0001974	0	ALDOA_SALSA Fructose-bisphosphate aldolase A OS=Salmo salar OX=8030 PE=1 SV=1
contig_7dpi0005297	9.41847e-58	PU60B_DANRE Poly(U)-binding-splicing factor PUF60-B OS=Danio rerio OX=7955 GN=puf60b PE=2 SV=2
contig_7dpi0010378	0.000412421	TRI33_DANRE E3 ubiquitin-protein ligase TRIM33 OS=Danio rerio OX=7955 GN=trim33 PE=2 SV=1
contig_7dpi0004791	1.37819e-33	HDAC3_TETNG Histone deacetylase 3 OS=Tetraodon nigroviridis OX=99883 GN=hdac3 PE=3 SV=1
contig_7dpi0037915	0.333116	LYRM1_SALSA LYR motif-containing protein 1 OS=Salmo salar OX=8030 GN=lyrm1 PE=2 SV=1
contig_7dpi0016334	0.00435422	MYPT1_DANRE Protein phosphatase 1 regulatory subunit 12A OS=Danio rerio OX=7955 GN=ppp1r12a PE=2 SV=2
contig_7dpi0024906	0.510593	MED21_DANRE Mediator of RNA polymerase II transcription subunit 21 OS=Danio rerio OX=7955 GN=med21 PE=2 SV=1
contig_7dpi0006876	0.479002	CISY_DANRE Citrate synthase, mitochondrial OS=Danio rerio OX=7955 GN=cs PE=2 SV=1
contig_7dpi0055830	0.054481	DLLD_DANRE Delta-like protein D OS=Danio rerio OX=7955 GN=dld PE=1 SV=2
contig_7dpi0015985	4.97648	ELAV4_DANRE ELAV-like protein 4 OS=Danio rerio OX=7955 GN=elavl4 PE=1 SV=2
contig_7dpi0020364	0	WDR82_DANRE WD repeat-containing protein 82 OS=Danio rerio OX=7955 GN=wdr82 PE=2 SV=1
contig_7dpi0005311	1.48218	S2548_DANRE Solute carrier family 25 member 48 OS=Danio rerio OX=7955 GN=slc25a48 PE=2 SV=1
contig_7dpi0021219	0.017703	IFT20_DANRE Intraflagellar transport protein 20 homolog OS=Danio rerio OX=7955 GN=ift20 PE=2 SV=1
contig_7dpi0038997	3.25897	NAT8L_DANRE N-acetylaspartate synthetase OS=Danio rerio OX=7955 GN=nat8l PE=2 SV=1
contig_7dpi0043409	0.227393	TTY2L_DANRE Protein tweety homolog 2-like OS=Danio rerio OX=7955 GN=ttyh2l PE=2 SV=1
contig_7dpi0002804	5.3831e-58	TBA_ONCKE Tubulin alpha chain OS=Oncorhynchus keta OX=8018 PE=2 SV=2
contig_7dpi0002441	0.00284297	TLE3B_DANRE Transducin-like enhancer protein 3-B OS=Danio rerio OX=7955 GN=tle3b PE=1 SV=2
contig_7dpi0032945	0.0589611	FEN1B_DANRE Probable flap endonuclease 1 homolog OS=Danio rerio OX=7955 GN=si:dkeyp-13a3.3 PE=2 SV=1
contig_7dpi0017803	1.91305	ESRP1_DANRE Epithelial splicing regulatory protein 1 OS=Danio rerio OX=7955 GN=esrp1 PE=2 SV=1
contig_7dpi0106726	0.156685	SOMA_ANGJA Somatotropin-1 OS=Anguilla japonica OX=7937 GN=gh1 PE=1 SV=2
contig_7dpi0079255	4.32387	PNCB_DANRE Nicotinate phosphoribosyltransferase OS=Danio rerio OX=7955 GN=naprt PE=2 SV=2
contig_7dpi0024239	0.842108	NIPLA_DANRE Nipped-B-like protein A OS=Danio rerio OX=7955 GN=nipbla PE=2 SV=1
contig_7dpi0010090	3.73974	CRA1B_DANRE Collagen alpha-1(XXVII) chain B OS=Danio rerio OX=7955 GN=col27a1b PE=2 SV=1
contig_7dpi0029028	0.10884	MPRGB_DANRE Membrane progestin receptor gamma-B OS=Danio rerio OX=7955 GN=paqr5b PE=2 SV=1
contig_7dpi0008288	2.6039e-08	HELZ_DANRE Probable helicase with zinc finger domain OS=Danio rerio OX=7955 GN=helz PE=2 SV=1
contig_7dpi0061959	0.393065	SNP47_DANRE Synaptosomal-associated protein 47 OS=Danio rerio OX=7955 GN=snap47 PE=2 SV=1
contig_7dpi0007271	8.94131	NBEL2_DANRE Neurobeachin-like protein 2 OS=Danio rerio OX=7955 GN=nbeal2 PE=1 SV=1
contig_7dpi0043833	0.319378	RL34_ICTPU 60S ribosomal protein L34 OS=Ictalurus punctatus OX=7998 GN=rpl34 PE=3 SV=3
contig_7dpi0019340	0.508389	ZCH18_DANRE Zinc finger CCCH domain-containing protein 18 OS=Danio rerio OX=7955 GN=zc3h18 PE=1 SV=1
contig_7dpi0016320	0.365505	MBB1A_DANRE Myb-binding protein 1A-like protein OS=Danio rerio OX=7955 GN=mybbp1a PE=1 SV=1
contig_7dpi0039045	0.152533	PI4KB_DANRE Phosphatidylinositol 4-kinase beta OS=Danio rerio OX=7955 GN=pi4kb PE=2 SV=2
contig_7dpi0058045		not available
contig_7dpi0015467	5.32434	UB2V2_DANRE Ubiquitin-conjugating enzyme E2 variant 2 OS=Danio rerio OX=7955 GN=ube2v2 PE=2 SV=1
contig_7dpi0006520	1.75398e-62	TERA_DANRE Transitional endoplasmic reticulum ATPase OS=Danio rerio OX=7955 GN=vcp PE=1 SV=1
contig_7dpi0024650	0.777094	EDC4_DANRE Enhancer of mRNA-decapping protein 4 OS=Danio rerio OX=7955 GN=edc4 PE=3 SV=1
contig_7dpi0006986	0.405415	SOSSC_SALSA SOSS complex subunit C OS=Salmo salar OX=8030 GN=inip PE=3 SV=1
contig_7dpi0014381	1.02247e-23	PI15A_DANRE Peptidase inhibitor 15-A OS=Danio rerio OX=7955 GN=pi15a PE=3 SV=2
contig_7dpi0008971	1.76224e-16	TDX_ONCMY Peroxiredoxin OS=Oncorhynchus mykiss OX=8022 PE=2 SV=1
contig_7dpi0015398	1.02017	CNTN5_DANRE Contactin-5 OS=Danio rerio OX=7955 GN=cntn5 PE=2 SV=1
contig_7dpi0001898	3.88998	OMM64_ONCMY Otolith matrix protein OMM-64 OS=Oncorhynchus mykiss OX=8022 GN=GSONMT00017137001 PE=1 SV=1
contig_7dpi0138403	1.90059	TRIO_DANRE Triple functional domain protein OS=Danio rerio OX=7955 GN=trio PE=3 SV=1
contig_7dpi0026155		not available
contig_7dpi0012768	3.32748	ESR2_MICUN Estrogen receptor beta OS=Micropogonias undulatus OX=29154 GN=esr2 PE=2 SV=1
contig_7dpi0065176	1.51682	GSE1_DANRE Genetic suppressor element 1 OS=Danio rerio OX=7955 GN=gse1 PE=4 SV=1
contig_7dpi0046441	3.24581	COL11_DANRE Collectin-11 OS=Danio rerio OX=7955 GN=colec11 PE=2 SV=1
contig_7dpi0012882		not available
contig_7dpi0028934	3.71968	BRAT1_DANRE BRCA1-associated ATM activator 1 OS=Danio rerio OX=7955 GN=brat1 PE=2 SV=1
contig_7dpi0017730	0.333447	WDR91_DANRE WD repeat-containing protein 91 OS=Danio rerio OX=7955 GN=wdr91 PE=1 SV=2
contig_7dpi0038792	3.4068e-64	SUMO3_DANRE Small ubiquitin-related modifier 3 OS=Danio rerio OX=7955 GN=sumo3 PE=3 SV=1
contig_7dpi0070107	0.168406	CP089_DANRE UPF0764 protein C16orf89 homolog OS=Danio rerio OX=7955 PE=2 SV=2
contig_7dpi0045942	0.219174	PCAT2_DANRE Lysophosphatidylcholine acyltransferase 2 OS=Danio rerio OX=7955 GN=lpcat2 PE=2 SV=1
contig_7dpi0035782	0.295996	CNO10_DANRE CCR4-NOT transcription complex subunit 10 OS=Danio rerio OX=7955 GN=cnot10 PE=2 SV=1
contig_7dpi0039709	2.75305	PDXD1_DANRE Pyridoxal-dependent decarboxylase domain-containing protein 1 OS=Danio rerio OX=7955 GN=pdxdc1 PE=2 SV=1
contig_7dpi0002860	0.47422	S1PR1_DANRE Sphingosine 1-phosphate receptor 1 OS=Danio rerio OX=7955 GN=s1pr1 PE=2 SV=2
contig_7dpi0007962	4.68067e-31	ALBU1_SALSA Serum albumin 1 OS=Salmo salar OX=8030 GN=alb1 PE=2 SV=1
contig_7dpi0029336	4.66003	CTIP_DANRE DNA endonuclease RBBP8 OS=Danio rerio OX=7955 GN=rbbp8 PE=2 SV=1
contig_7dpi0005134	6.51099	KL40A_DANRE Kelch-like protein 40a OS=Danio rerio OX=7955 GN=klhl40a PE=2 SV=2
contig_7dpi0087620		not available
contig_7dpi0012327	4.89328	PPB_GADMO Alkaline phosphatase OS=Gadus morhua OX=8049 PE=1 SV=1
contig_7dpi0019567	2.78967e-11	TERA_DANRE Transitional endoplasmic reticulum ATPase OS=Danio rerio OX=7955 GN=vcp PE=1 SV=1
contig_7dpi0056982	0.822558	NARF_DANRE Nuclear prelamin A recognition factor OS=Danio rerio OX=7955 GN=narf PE=2 SV=1
contig_7dpi0040689	2.21347	NU6M_CARAU NADH-ubiquinone oxidoreductase chain 6 OS=Carassius auratus OX=7957 GN=MT-ND6 PE=3 SV=1
contig_7dpi0030254	4.36751	DCR1C_DANRE Protein artemis OS=Danio rerio OX=7955 GN=dclre1c PE=2 SV=1
contig_7dpi0111936	0.933219	S39AE_DANRE Zinc transporter ZIP14 OS=Danio rerio OX=7955 GN=slc39a14 PE=2 SV=1
contig_7dpi0006519	4.40614e-59	TERA_DANRE Transitional endoplasmic reticulum ATPase OS=Danio rerio OX=7955 GN=vcp PE=1 SV=1
contig_7dpi0026110	1.00254	PURB_DANRE Transcriptional activator protein Pur-beta OS=Danio rerio OX=7955 GN=purb PE=2 SV=3
contig_7dpi0020648	5.06563e-160	A1AT_CYPCA Alpha-1-antitrypsin homolog OS=Cyprinus carpio OX=7962 PE=2 SV=1
contig_7dpi0008946	7.84948e-36	NOP10_DANRE H/ACA ribonucleoprotein complex subunit 3 OS=Danio rerio OX=7955 GN=nop10 PE=3 SV=1
contig_7dpi0064351	0.18726	ESR2_ICTPU Estrogen receptor beta OS=Ictalurus punctatus OX=7998 GN=esr2 PE=2 SV=1
contig_7dpi0092795	9.70117	MY9AA_DANRE Unconventional myosin-IXAa OS=Danio rerio OX=7955 GN=myo9aa PE=3 SV=1
contig_7dpi0034633	3.17589	SC4AB_TAKRU Sodium channel protein type 4 subunit alpha B OS=Takifugu rubripes OX=31033 GN=scn4ab PE=3 SV=1
contig_7dpi0052423	0.415966	RFP4A_DANRE Rab11 family-interacting protein 4A OS=Danio rerio OX=7955 GN=rab11fip4a PE=2 SV=1
contig_7dpi0001660	9.49856	ATP8_DICLA ATP synthase protein 8 OS=Dicentrarchus labrax OX=13489 GN=mt-atp8 PE=3 SV=1
contig_7dpi0000420	4.05236e-66	PLXA3_DANRE Plexin A3 OS=Danio rerio OX=7955 GN=plxna3 PE=2 SV=2
contig_7dpi0055429	0.592043	KPB2_TAKRU Phosphorylase b kinase regulatory subunit alpha, liver isoform OS=Takifugu rubripes OX=31033 GN=phka2 PE=3 SV=1
contig_7dpi0018659	2.85016	GMPAA_DANRE Mannose-1-phosphate guanyltransferase alpha-A OS=Danio rerio OX=7955 GN=gmppaa PE=2 SV=1
contig_7dpi0009321	0.907116	IFNG1_CARAU Interferon gamma 1 OS=Carassius auratus OX=7957 GN=ifng1 PE=1 SV=1
contig_7dpi0527282	0.148977	AMBP_PLEPL Protein AMBP (Fragment) OS=Pleuronectes platessa OX=8262 PE=2 SV=1
contig_7dpi0016416	1.68203e-23	PSB1A_CARAU Proteasome subunit beta type-1-A OS=Carassius auratus OX=7957 GN=psmb1-A PE=2 SV=1
contig_7dpi0002670	8.73991e-81	OLA1_DANRE Obg-like ATPase 1 OS=Danio rerio OX=7955 GN=ola1 PE=2 SV=1
contig_7dpi0016723	1.14655e-40	TBA_ONCKE Tubulin alpha chain OS=Oncorhynchus keta OX=8018 PE=2 SV=2
contig_7dpi0034007	2.34742	STIL_DANRE SCL-interrupting locus protein homolog OS=Danio rerio OX=7955 GN=stil PE=1 SV=2
contig_7dpi0008375	0.164939	TYRO3_DANRE Tyrosine-protein kinase receptor TYRO3 OS=Danio rerio OX=7955 GN=tyro3 PE=2 SV=1
contig_7dpi0026452	0.689868	PK1L1_ORYLA Polycystic kidney disease 1 like 1 OS=Oryzias latipes OX=8090 GN=pkd1l1 PE=1 SV=2
contig_7dpi0032604	9.7552	HTR5A_DANRE HEAT repeat-containing protein 5A OS=Danio rerio OX=7955 GN=heatr5a PE=2 SV=1
contig_7dpi0006000	3.75866	NAA35_DANRE N-alpha-acetyltransferase 35, NatC auxiliary subunit OS=Danio rerio OX=7955 GN=naa35 PE=2 SV=1
contig_7dpi0015895	1.05258	DRXIB_SALSA Draxin-B OS=Salmo salar OX=8030 GN=draxin-B PE=2 SV=1
contig_7dpi0015130	0.681047	PTHD1_DANRE Patched domain-containing protein 1 OS=Danio rerio OX=7955 GN=ptchd1 PE=3 SV=1
contig_7dpi0007578	1.68752e-51	TERA_DANRE Transitional endoplasmic reticulum ATPase OS=Danio rerio OX=7955 GN=vcp PE=1 SV=1
contig_7dpi0032557	1.02899	CBPC2_DANRE Cytosolic carboxypeptidase 2 OS=Danio rerio OX=7955 GN=zte25 PE=2 SV=1
contig_7dpi0044118	0.305057	POPD1_DANRE Blood vessel epicardial substance OS=Danio rerio OX=7955 GN=bves PE=1 SV=1
contig_7dpi0072404	0.274384	EXD1_DANRE piRNA biogenesis protein EXD1 OS=Danio rerio OX=7955 GN=exd1 PE=2 SV=1
contig_7dpi0010426	1.305	RBM44_DANRE RNA-binding protein 44 OS=Danio rerio OX=7955 GN=rbm44 PE=3 SV=1
contig_7dpi0011171	6.95946	PTER_TETNG Phosphotriesterase-related protein OS=Tetraodon nigroviridis OX=99883 GN=pter PE=3 SV=1
contig_7dpi0048449	0.861201	MNAR1_DANRE Major intrinsically disordered Notch2-binding receptor 1 OS=Danio rerio OX=7955 GN=minar1 PE=2 SV=3
contig_7dpi0008572	1.51126	SMY2A_DANRE N-lysine methyltransferase SMYD2-A OS=Danio rerio OX=7955 GN=smyd2a PE=2 SV=1
contig_7dpi0003799	7.29925	ABCB8_DANRE ATP-binding cassette sub-family B member 8, mitochondrial OS=Danio rerio OX=7955 GN=abcb8 PE=2 SV=1
contig_7dpi0008940	6.00491	LDHBB_DANRE L-lactate dehydrogenase B-B chain OS=Danio rerio OX=7955 GN=ldhbb PE=2 SV=1
contig_7dpi0013132	0.653034	KDISB_DANRE Kinase D-interacting substrate of 220 kDa B OS=Danio rerio OX=7955 GN=kidins220b PE=1 SV=3
contig_7dpi0007582	2.37443	LYSC_TAKRU Lysozyme C OS=Takifugu rubripes OX=31033 PE=2 SV=1
contig_7dpi0008634	1.38841	GON3_ONCTS Progonadoliberin-3 (Fragment) OS=Oncorhynchus tshawytscha OX=74940 GN=gnrh3 PE=3 SV=1
contig_7dpi0016647	0.777928	RFA1_DANRE Replication protein A 70 kDa DNA-binding subunit OS=Danio rerio OX=7955 GN=rpa1 PE=1 SV=1
contig_7dpi0009206	0.386229	PIWL2_DANRE Piwi-like protein 2 OS=Danio rerio OX=7955 GN=piwil2 PE=1 SV=2
contig_7dpi0011207		not available
contig_7dpi0001029	0.142887	SRRM4_DANRE Serine/arginine repetitive matrix protein 4 OS=Danio rerio OX=7955 GN=srrm4 PE=2 SV=1
contig_7dpi0619143	0.733196	S40A1_DANRE Solute carrier family 40 member 1 OS=Danio rerio OX=7955 GN=slc40a1 PE=2 SV=2
contig_7dpi0003235	9.51105e-138	CCNB1_ANGJA G2/mitotic-specific cyclin-B1 OS=Anguilla japonica OX=7937 GN=ccnb1 PE=2 SV=1
contig_7dpi0007521	1.80457	PK1L1_ORYLA Polycystic kidney disease 1 like 1 OS=Oryzias latipes OX=8090 GN=pkd1l1 PE=1 SV=2
contig_7dpi0076714	1.11605	DMT1Y_ORYLA Doublesex- and mab-3-related transcription factor 1Y OS=Oryzias latipes OX=8090 GN=dmrt1y PE=2 SV=1
contig_7dpi0022836	3.60883e-79	TXD17_EPICO Thioredoxin domain-containing protein 17 OS=Epinephelus coioides OX=94232 PE=2 SV=1
contig_7dpi0013407	0.342755	TBX6L_DANRE T-box transcription factor TBX6L OS=Danio rerio OX=7955 GN=tbx6l PE=2 SV=1
contig_7dpi0018663	3.1757	CATA_DANRE Catalase OS=Danio rerio OX=7955 GN=cat PE=2 SV=1
contig_7dpi0007201	0.426984	MYCB2_DANRE E3 ubiquitin-protein ligase MYCBP2 OS=Danio rerio OX=7955 GN=mycbp2 PE=2 SV=1
contig_7dpi0019985	1.05591	SAC2_DANRE Phosphatidylinositide phosphatase SAC2 OS=Danio rerio OX=7955 GN=inpp5f PE=3 SV=1
contig_7dpi0006329	0.560213	FUT10_DANRE Alpha-(1,3)-fucosyltransferase 10 OS=Danio rerio OX=7955 GN=fut10 PE=2 SV=3
contig_7dpi0078847	2.45527	PK1L1_ORYLA Polycystic kidney disease 1 like 1 OS=Oryzias latipes OX=8090 GN=pkd1l1 PE=1 SV=2
contig_7dpi0018890	0	ILF2_DANRE Interleukin enhancer-binding factor 2 homolog OS=Danio rerio OX=7955 GN=ilf2 PE=2 SV=1
contig_7dpi0023537	4.86027	NEUAB_DANRE N-acylneuraminate cytidylyltransferase B OS=Danio rerio OX=7955 GN=cmasb PE=1 SV=1
contig_7dpi0028980	0.827076	FBLN1_DANRE Fibulin-1 OS=Danio rerio OX=7955 GN=fbln1 PE=2 SV=1
contig_7dpi0004627	1.36129e-09	PLD3A_DANRE 1-phosphatidylinositol 4,5-bisphosphate phosphodiesterase delta-3-A OS=Danio rerio OX=7955 GN=plcd3a PE=2 SV=1
contig_7dpi0042952	1.68612	LRFN1_DANRE Leucine-rich repeat and fibronectin type III domain-containing protein 1 OS=Danio rerio OX=7955 GN=lrfn1 PE=2 SV=1
contig_7dpi0048262	2.72991	MT12B_DANRE Monocarboxylate transporter 12-B OS=Danio rerio OX=7955 GN=slc16a12b PE=2 SV=1
contig_7dpi0033113	1.3004	MAD3_DANRE Max dimerization protein 3 OS=Danio rerio OX=7955 GN=mxd3 PE=2 SV=1
contig_7dpi0000051	2.52437e-39	UB2V2_DANRE Ubiquitin-conjugating enzyme E2 variant 2 OS=Danio rerio OX=7955 GN=ube2v2 PE=2 SV=1
contig_7dpi0030820	0.128809	ACTX_TAKRU Actin, alpha anomalous OS=Takifugu rubripes OX=31033 PE=2 SV=1
contig_7dpi0010075	1.0291	VWA8_DANRE von Willebrand factor A domain-containing protein 8 OS=Danio rerio OX=7955 GN=si:dkey-18l1.1 PE=3 SV=1
contig_7dpi0003362	0.0152834	HV05_CARAU Ig heavy chain V region 5A OS=Carassius auratus OX=7957 PE=4 SV=1
contig_7dpi0130622		not available
contig_7dpi0000748	2.03118e-12	PEF1_DANRE Peflin OS=Danio rerio OX=7955 GN=pef1 PE=2 SV=1
contig_7dpi0014696	1.62144e-68	SPP24_SALSA Secreted phosphoprotein 24 OS=Salmo salar OX=8030 GN=spp2 PE=2 SV=1
contig_7dpi0002500	1.18056	SOMA_CYPCA Somatotropin OS=Cyprinus carpio OX=7962 GN=gh PE=1 SV=2
contig_7dpi0015146	1.36351e-19	SRS1A_DANRE Serine/arginine-rich splicing factor 1A OS=Danio rerio OX=7955 GN=srsf1a PE=2 SV=2
contig_7dpi0032386	6.07171	GRB1L_DANRE GREB1-like protein OS=Danio rerio OX=7955 GN=greb1l PE=2 SV=2
contig_7dpi0027809	0.288282	GNB5A_DANRE Guanine nucleotide-binding protein subunit beta-5a OS=Danio rerio OX=7955 GN=gnb5a PE=2 SV=1
contig_7dpi0030495	1.94959e-39	CHM1B_DANRE Charged multivesicular body protein 1b OS=Danio rerio OX=7955 GN=chmp1b PE=2 SV=1
contig_7dpi0021985	0.517215	DPYL3_DANRE Dihydropyrimidinase-related protein 3 OS=Danio rerio OX=7955 GN=dpysl3 PE=2 SV=1
contig_7dpi0002117	1.74891	CTL5B_DANRE Choline transporter-like protein 5-B (Fragment) OS=Danio rerio OX=7955 GN=slc44a5b PE=3 SV=1
contig_7dpi0007671	0.0180576	LAMB4_DANRE Laminin subunit beta-4 OS=Danio rerio OX=7955 GN=lamb4 PE=2 SV=1
contig_7dpi0023409	3.8856	MBOA7_DANRE Lysophospholipid acyltransferase 7 OS=Danio rerio OX=7955 GN=mboat7 PE=2 SV=1
contig_7dpi0010069	0.732973	K1109_DANRE Transmembrane protein KIAA1109 homolog OS=Danio rerio OX=7955 GN=si:ch211-233a24.2 PE=3 SV=1
contig_7dpi0004081	4.53952	ZWILC_DANRE Protein zwilch homolog OS=Danio rerio OX=7955 GN=zwilch PE=2 SV=1
contig_7dpi0052027	0.53427	CTL2_DANRE Choline transporter-like protein 2 OS=Danio rerio OX=7955 GN=slc44a2 PE=2 SV=1
contig_7dpi0044954	1.30194	RM41_DANRE 39S ribosomal protein L41, mitochondrial OS=Danio rerio OX=7955 GN=mrpl41 PE=2 SV=1
contig_7dpi0088175	0.258709	PLD6_DANRE Mitochondrial cardiolipin hydrolase OS=Danio rerio OX=7955 GN=pld6 PE=2 SV=2
contig_7dpi0008892		not available
contig_7dpi0158559	1.04923	NU4M_SALSA NADH-ubiquinone oxidoreductase chain 4 OS=Salmo salar OX=8030 GN=MT-ND4 PE=3 SV=1
contig_7dpi0024778	3.29531e-16	PCAT2_DANRE Lysophosphatidylcholine acyltransferase 2 OS=Danio rerio OX=7955 GN=lpcat2 PE=2 SV=1
contig_7dpi0012554	0.00980798	C19L1_DANRE CWF19-like protein 1 OS=Danio rerio OX=7955 GN=cwf19l1 PE=2 SV=1
contig_7dpi0368625	1.07e-19	HBA_SALSA Hemoglobin subunit alpha OS=Salmo salar OX=8030 GN=hba PE=2 SV=2
contig_7dpi0172545	0.498572	OPA1_DANRE Dynamin-like 120 kDa protein, mitochondrial OS=Danio rerio OX=7955 GN=opa1 PE=2 SV=1
contig_7dpi0023630	0.131765	PHLA2_SALSA Pleckstrin homology-like domain family A member 2 OS=Salmo salar OX=8030 GN=phlda2 PE=2 SV=1
contig_7dpi0009903	3.10964	RIR2_DANRE Ribonucleoside-diphosphate reductase subunit M2 OS=Danio rerio OX=7955 GN=rrm2 PE=1 SV=1
contig_7dpi0070025	1.12946	C85CB_DANRE Coiled-coil domain-containing protein 85C-B OS=Danio rerio OX=7955 GN=ccdc85cb PE=2 SV=1
contig_7dpi0025271	0.845788	HACE1_DANRE E3 ubiquitin-protein ligase HACE1 OS=Danio rerio OX=7955 GN=hace1 PE=3 SV=2
contig_7dpi0004521	0.97831	OPA1_DANRE Dynamin-like 120 kDa protein, mitochondrial OS=Danio rerio OX=7955 GN=opa1 PE=2 SV=1
contig_7dpi0011767		not available
contig_7dpi0028097	3.13451	TY3H_ANGAN Tyrosine 3-monooxygenase OS=Anguilla anguilla OX=7936 GN=th PE=2 SV=1
contig_7dpi0011300	7.3053e-12	NEUFC_DANRE Neuferricin OS=Danio rerio OX=7955 GN=cyb5d2 PE=3 SV=1
contig_7dpi0006847	0.375051	RBMX_DANRE RNA-binding motif protein, X chromosome OS=Danio rerio OX=7955 GN=rbmx PE=2 SV=1
contig_7dpi0026751	1.92759	GLUC2_ONCMY Glucagon-2 OS=Oncorhynchus mykiss OX=8022 GN=gcg2 PE=2 SV=1
contig_7dpi0019071	0.577082	ESRP1_DANRE Epithelial splicing regulatory protein 1 OS=Danio rerio OX=7955 GN=esrp1 PE=2 SV=1
contig_7dpi0048179	2.81205	TPM1_DANRE Tropomyosin alpha-1 chain OS=Danio rerio OX=7955 GN=tpma PE=2 SV=1
contig_7dpi0022713	3.73046	MEI4_DANRE Meiosis-specific protein MEI4 OS=Danio rerio OX=7955 GN=mei4 PE=2 SV=1
contig_7dpi0008127	1.2627	ORML3_DANRE ORM1-like protein 3 OS=Danio rerio OX=7955 GN=ormdl3 PE=2 SV=1
contig_7dpi0028702	0.0677046	ABRX1_DANRE BRCA1-A complex subunit Abraxas 1 OS=Danio rerio OX=7955 GN=abraxas1 PE=2 SV=1
contig_7dpi0016756	2.3909	CMTR1_DANRE Cap-specific mRNA (nucleoside-2'-O-)-methyltransferase 1 OS=Danio rerio OX=7955 GN=cmtr1 PE=2 SV=1
contig_7dpi0091752	0.885934	WASC5_DANRE WASH complex subunit 5 OS=Danio rerio OX=7955 GN=washc5 PE=2 SV=1
contig_7dpi0000253	0.488061	IBP2A_DANRE Insulin-like growth factor-binding protein 2-A OS=Danio rerio OX=7955 GN=igfbp2a PE=1 SV=1
contig_7dpi0014771		not available
contig_7dpi0012918	0.00019051	PU60B_DANRE Poly(U)-binding-splicing factor PUF60-B OS=Danio rerio OX=7955 GN=puf60b PE=2 SV=2
contig_7dpi0045009	5.21486e-17	PSA2_CARAU Proteasome subunit alpha type-2 OS=Carassius auratus OX=7957 GN=psma2 PE=2 SV=3
contig_7dpi0037972	1.53491	DISP1_DANRE Protein dispatched homolog 1 OS=Danio rerio OX=7955 GN=disp1 PE=2 SV=1
contig_7dpi0038319	0.966728	GINM1_DANRE Glycoprotein integral membrane protein 1 OS=Danio rerio OX=7955 GN=ginm1 PE=2 SV=1
contig_7dpi0067930	0.870221	AF1L1_DANRE Actin filament-associated protein 1-like 1 OS=Danio rerio OX=7955 GN=afap1l1 PE=2 SV=1
contig_7dpi0049421		not available
contig_7dpi0008549	1.92179	NOL10_DANRE Nucleolar protein 10 OS=Danio rerio OX=7955 GN=nol10 PE=2 SV=1
contig_7dpi0041393	3.87736	VGFR4_DANRE Vascular endothelial growth factor receptor kdr-like OS=Danio rerio OX=7955 GN=kdrl PE=1 SV=1
contig_7dpi0005994	1.07262e-06	THIO_ICTPU Thioredoxin OS=Ictalurus punctatus OX=7998 GN=txn PE=3 SV=1
contig_7dpi0019612	3.01237	SVOPL_DANRE Putative transporter SVOPL OS=Danio rerio OX=7955 GN=svopl PE=2 SV=1
contig_7dpi0041983	0.749561	ALKMO_DANRE Alkylglycerol monooxygenase OS=Danio rerio OX=7955 GN=agmo PE=2 SV=1
contig_7dpi0043995	1.06276	HXC8A_TAKRU Homeobox protein Hox-C8a OS=Takifugu rubripes OX=31033 GN=hoxc8a PE=3 SV=1
contig_7dpi0011809	3.32112	PACC1_DANRE Proton-activated chloride channel OS=Danio rerio OX=7955 GN=pacc1 PE=2 SV=1
contig_7dpi0035873	7.95365	ASI1B_DANRE Acid-sensing ion channel 1B OS=Danio rerio OX=7955 GN=asic1b PE=2 SV=1
contig_7dpi0020124	4.33744	NU3M_DANRE NADH-ubiquinone oxidoreductase chain 3 OS=Danio rerio OX=7955 GN=mt-nd3 PE=3 SV=1
contig_7dpi0033668	0.89646	ERH_DANRE Enhancer of rudimentary homolog OS=Danio rerio OX=7955 GN=erh PE=3 SV=1
contig_7dpi0044102	0	CSN5_DANRE COP9 signalosome complex subunit 5 OS=Danio rerio OX=7955 GN=cops5 PE=2 SV=1
contig_7dpi0005922	0.149838	FEV_DANRE Protein FEV OS=Danio rerio OX=7955 GN=fev PE=2 SV=1
contig_7dpi0080044	0.1923	SYYC_DANRE Tyrosine--tRNA ligase, cytoplasmic OS=Danio rerio OX=7955 GN=yars PE=2 SV=2
contig_7dpi0070406	1.05528	NU4LM_SALSA NADH-ubiquinone oxidoreductase chain 4L OS=Salmo salar OX=8030 GN=MT-ND4L PE=3 SV=1
contig_7dpi0013993	0	HEMO_DANRE Hemopexin OS=Danio rerio OX=7955 GN=hpx PE=2 SV=2
contig_7dpi0027205	0.411868	GON3_RUTRU Progonadoliberin-3 OS=Rutilus rutilus OX=48668 GN=gnrh3 PE=3 SV=2
contig_7dpi0004983	3.43322	TPPC2_DANRE Trafficking protein particle complex subunit 2 OS=Danio rerio OX=7955 GN=trappc2 PE=2 SV=1
contig_7dpi0007134		not available
contig_7dpi0268141	2.34155	AGRA3_DANRE Adhesion G protein-coupled receptor A3 OS=Danio rerio OX=7955 GN=adgra3 PE=1 SV=1
contig_7dpi0005395	4.88625e-23	KIF7_DANRE Kinesin-like protein kif7 OS=Danio rerio OX=7955 GN=kif7 PE=1 SV=1
contig_7dpi0020688	0.609662	NR3BB_DANRE Neurexin-3b-beta OS=Danio rerio OX=7955 GN=nrxn3b PE=2 SV=1
contig_7dpi0020565	0.265791	CACO1_DANRE Calcium-binding and coiled-coil domain-containing protein 1 OS=Danio rerio OX=7955 GN=calcoco1 PE=3 SV=1
contig_7dpi0004737	2.10916	FOXA2_ORYLA Hepatocyte nuclear factor 3-beta OS=Oryzias latipes OX=8090 GN=foxa2 PE=2 SV=1
contig_7dpi0006973	2.41599e-34	EF1A_ORYLA Elongation factor 1-alpha OS=Oryzias latipes OX=8090 GN=eef1a PE=2 SV=1
contig_7dpi0003595	2.09815e-28	RHOAA_DANRE Rho-related GTP-binding protein RhoA-A OS=Danio rerio OX=7955 GN=rhoaa PE=1 SV=1
contig_7dpi0007963	3.18941e-31	ALBU2_SALSA Serum albumin 2 OS=Salmo salar OX=8030 GN=alb2 PE=2 SV=1
contig_7dpi0008693	2.41176e-22	CHM4B_DANRE Charged multivesicular body protein 4b OS=Danio rerio OX=7955 GN=chmp4b PE=2 SV=1
contig_7dpi0007450	1.10079	PHR_CARAU Deoxyribodipyrimidine photo-lyase OS=Carassius auratus OX=7957 GN=phr PE=2 SV=1
contig_7dpi0003194	0.958742	BNCR_ORYLA Protein Bouncer OS=Oryzias latipes OX=8090 GN=bncr PE=2 SV=1
contig_7dpi0013254	1.68404	TBB1_GADMO Tubulin beta-1 chain OS=Gadus morhua OX=8049 PE=2 SV=1
contig_7dpi0077615		not available
contig_7dpi0055406	0.0167917	GILT_CARAU Gamma-interferon-inducible lysosomal thiol reductase OS=Carassius auratus OX=7957 GN=ifi30 PE=1 SV=1
contig_7dpi0003632	1.00904	EIF3A_DANRE Eukaryotic translation initiation factor 3 subunit A OS=Danio rerio OX=7955 GN=eif3a PE=2 SV=1
contig_7dpi0016513	0.874975	HSDL1_DANRE Inactive hydroxysteroid dehydrogenase-like protein 1 OS=Danio rerio OX=7955 GN=hsdl1 PE=2 SV=1
contig_7dpi0026723	9.41147e-54	HMOX_TAKRU Heme oxygenase OS=Takifugu rubripes OX=31033 GN=hmox PE=3 SV=1
contig_7dpi0042368		not available
contig_7dpi0041271	0.296129	CAC1S_CYPCA Dihydropyridine-sensitive L-type skeletal muscle calcium channel subunit alpha-1 OS=Cyprinus carpio OX=7962 PE=2 SV=1
contig_7dpi0053413	0.185826	KCMF1_DANRE E3 ubiquitin-protein ligase KCMF1 OS=Danio rerio OX=7955 GN=kcmf1 PE=2 SV=1
contig_7dpi0019029	5.91488e-36	TM258_DANRE Transmembrane protein 258 OS=Danio rerio OX=7955 GN=tmem258 PE=3 SV=1
contig_7dpi0005335	7.02932e-15	TPISB_DANRE Triosephosphate isomerase B OS=Danio rerio OX=7955 GN=tpi1b PE=2 SV=1
contig_7dpi0006454	5.90865	WDCP_DANRE WD repeat and coiled-coil-containing protein OS=Danio rerio OX=7955 GN=wdcp PE=2 SV=2
contig_7dpi0010513	0.163976	SCRIB_DANRE Protein scribble homolog OS=Danio rerio OX=7955 GN=scrib PE=1 SV=1
contig_7dpi0557197	0.442808	TRI33_DANRE E3 ubiquitin-protein ligase TRIM33 OS=Danio rerio OX=7955 GN=trim33 PE=2 SV=1
contig_7dpi0098345	0.228168	POPD2_DANRE Popeye domain-containing 2 OS=Danio rerio OX=7955 GN=popdc2 PE=2 SV=1
contig_7dpi0002394	1.60636e-15	MTHSD_DANRE Methenyltetrahydrofolate synthase domain-containing protein OS=Danio rerio OX=7955 GN=mthfsd PE=2 SV=1
contig_7dpi0025674	1.24454	DLG2_DANRE Disks large homolog 2 OS=Danio rerio OX=7955 GN=dlg2 PE=2 SV=1
contig_7dpi0023526	8.83672e-90	IMA6_DANRE Importin subunit alpha-6 OS=Danio rerio OX=7955 GN=kpna5 PE=2 SV=2
contig_7dpi0021909	9.96115	STB1B_DANRE Histone-lysine N-methyltransferase SETDB1-B OS=Danio rerio OX=7955 GN=setdb1b PE=2 SV=2
contig_7dpi0015187	1.6274e-48	I2B2B_DANRE Interferon regulatory factor 2-binding protein 2-B OS=Danio rerio OX=7955 GN=irf2bp2b PE=2 SV=1
contig_7dpi0178872	3.84634	ELOV5_TACFU Elongation of very long chain fatty acids protein 5 OS=Tachysurus fulvidraco OX=1234273 GN=ELOVL5 PE=2 SV=1
contig_7dpi0061338	1.5815	HBB_THUTH Hemoglobin subunit beta OS=Thunnus thynnus OX=8237 GN=hbb PE=1 SV=1
contig_7dpi0011015	0.0429868	DOK7_TAKRU Protein Dok-7 OS=Takifugu rubripes OX=31033 GN=dok7 PE=2 SV=1
contig_7dpi0062947	0.305786	G3P_DANRE Glyceraldehyde-3-phosphate dehydrogenase OS=Danio rerio OX=7955 GN=gapdh PE=2 SV=2
contig_7dpi0003229	1.23171	OPSD_GOBNI Rhodopsin OS=Gobius niger OX=85417 GN=rho PE=2 SV=1
contig_7dpi0024724	4.47747	G6PD_TAKRU Glucose-6-phosphate 1-dehydrogenase OS=Takifugu rubripes OX=31033 GN=g6pd PE=3 SV=1
contig_7dpi0032039	0.402194	PIWL1_DANRE Piwi-like protein 1 OS=Danio rerio OX=7955 GN=piwil1 PE=1 SV=1
contig_7dpi0028127	1.42654	HMX3_DANRE Homeobox protein HMX3 OS=Danio rerio OX=7955 GN=hmx3 PE=2 SV=1
contig_7dpi0011586	2.19278	MCA2B_DANRE Protein-methionine sulfoxide oxidase mical2b OS=Danio rerio OX=7955 GN=mical2b PE=2 SV=2
contig_7dpi0024794	0.0166254	S35A5_DANRE Probable UDP-sugar transporter protein SLC35A5 OS=Danio rerio OX=7955 GN=slc35a5 PE=2 SV=1
contig_7dpi0007811		not available
contig_7dpi0004042	0.317563	NOGG2_DANRE Noggin-2 OS=Danio rerio OX=7955 GN=nog2 PE=2 SV=1
contig_7dpi0039844	9.57873	SORT1_DANRE Sortilin OS=Danio rerio OX=7955 GN=sort1 PE=2 SV=1
contig_7dpi0026371	0.173506	DPCD_DANRE Protein DPCD OS=Danio rerio OX=7955 GN=dpcd PE=2 SV=1
contig_7dpi0017825	5.99171	NR1BA_DANRE Neurexin-1b OS=Danio rerio OX=7955 GN=nrxn1b PE=2 SV=1
contig_7dpi0024252	7.74574	SBP1_DANRE Methanethiol oxidase OS=Danio rerio OX=7955 GN=selenbp1 PE=2 SV=1
contig_7dpi0019766	1.516	RCN1_TAKRU Reticulocalbin-1 OS=Takifugu rubripes OX=31033 GN=rcn1 PE=3 SV=1
contig_7dpi0001740	2.87879	UBR3_DANRE E3 ubiquitin-protein ligase ubr3 OS=Danio rerio OX=7955 GN=ubr3 PE=2 SV=2
[truncated: 7,095 more rows]

## Sheet: Skin_Cluster1
Cluster 1	Lowest E-value	Description
[truncated: 6,827 more rows]

## Sheet: Skin_Cluster2
Cluster 2	Lowest E-value	Description (E-value)
[truncated: 15,998 more rows]

## Sheet: Skin_Cluster3
Cluster 3	Lowest E-value	Description (E-value)
[truncated: 14,892 more rows]
